# Supplementary material for: Chlamydia pneumoniae Interferes with Macrophage Differentiation and Cell Cycle Regulation to Promote Its Replication
Source: Hindawi journal article supplement (doi:10.1155/2022/9854449), 2022-04-11
Supplement: f1 [file 9854449.f1.zip]

Archive with 4 entries (4 files):
- Supplementary_figure_1_and_2.docx
- Supplementary_Table_1 (1).docx
- Supplementary_table_2.xlsx
- Supplementary_Table_3_revised.docx
