# Supplementary material for: Chlamydia pneumoniae Interferes with Macrophage Differentiation and Cell Cycle Regulation to Promote Its Replication
Source: Hindawi journal article supplement (doi:10.1155/2022/9854449), 2022-04-11
Supplement: f1 [file 9854449.f1.zip › Supplementary_Table_1 (1).docx]

Supplementary Table 1. Primers used in RT-PCR analysis.

| Gene | Primers | Reference |
| --- | --- | --- |
| MCM2 | **F:** 5’-AATTTCGTCCTGGGTCCTTT -3’  **R:** 5’- CACTTTGCCTGGACTCTCCT -3’ | Das et al. 2013 |
| MCM3 | **F:** 5’- CTTTCCCTCCAGCTCTGTCTA -3’  **R:** 5’- TCACCAGGCTTCGCTTTATC -3’ | Das et al. 2013 |
| MCM4 | **F:** 5’- TTCTTTGACCGTTACCCTGA -3’  **R:** 5’- ACACTTGGCACTGGAAGAAG -3’ | Das et al. 2013 |
| MCM5 | **F:** 5’- AGCATTCGTAGCCTGAAGTCG -3’  **R:** 5’- CGGCACTGGATAGAGATGCG -3’ | Wang et al. 2018 |
| MCM6 | **F:** 5’- AAGCACGTGGAGGAGTTCAG -3’  **R:** 5’- CGCACGTCCATCTTATCAAA -3’ | Das et al. 2013 |
| MCM7 | **F:** 5’- GCTGATTGCCGTACAAGAG -3’  **R:** 5’- AGCAGGGTACTGGTTCTG -3’ | Li et al. 2016 |
| CDK6 | **F:** 5’- TGCACAGTGTCACGAACAGA -3’  **R:** 5’- ACCTCGGAGAAGCTGAAACA -3’ | Zhu et al. 2016 |
| GAPDH | **F:** 5’- CATCACTGCCACCCAGAAGCTGTGGA -3’  **R:** 5’- TACTCCTTGGAGGCCATGTAGGCCATG -3’ | Virok et al. 2003 |

The absence of cross-recognition in *C. pneumoniae* for the primers used to analyze human cDNA was confirmed using NCBI Primer-BLAST (Johnson et al. 2008).
