# Supplementary material for: Chlamydia pneumoniae Interferes with Macrophage Differentiation and Cell Cycle Regulation to Promote Its Replication
Source: Hindawi journal article supplement (doi:10.1155/2022/9854449), 2022-04-11
Supplement: f1 [file 9854449.f1.zip › Supplementary_table_2.xlsx]

## Sheet: proteinGroups_P15158-P15173
Protein Ids	Majority protein IDs	Peptide counts (all)	Peptide counts (razor+unique)	Peptide counts (unique)	Protein names	Gene names	Fasta headers	Number of proteins	Peptides	Razor + unique peptides	Unique peptides	Peptides 1	Peptides 10	Peptides 11	Peptides 12	Peptides 2	Peptides 3	Peptides 4	Peptides 5	Peptides 6	Peptides 7	Peptides 8	Peptides 9	Razor + unique peptides 1	Razor + unique peptides 10	Razor + unique peptides 11	Razor + unique peptides 12	Razor + unique peptides 2	Razor + unique peptides 3	Razor + unique peptides 4	Razor + unique peptides 5	Razor + unique peptides 6	Razor + unique peptides 7	Razor + unique peptides 8	Razor + unique peptides 9	Unique peptides 1	Unique peptides 10	Unique peptides 11	Unique peptides 12	Unique peptides 2	Unique peptides 3	Unique peptides 4	Unique peptides 5	Unique peptides 6	Unique peptides 7	Unique peptides 8	Unique peptides 9	Sequence coverage [%]	Unique + razor sequence coverage [%]
P0DPI2;A0A0B4J2D5	P0DPI2;A0A0B4J2D5	11;11	11;11	11;11			;	2	11	11	11	8	9	9	10	10	9	9	10	9	10	9	8	8	9	9	10	10	9	9	10	9	10	9	8	8	9	9	10	10	9	9	10	9	10	9	8	60.1	60.1
A0AV96	A0AV96	2	2	2	RNA-binding protein 47	RBM47		1	2	2	2	1	2	1	2	1	1	1	2	2	1	1	1	1	2	1	2	1	1	1	2	2	1	1	1	1	2	1	2	1	1	1	2	2	1	1	1	2021-04-05	2021-04-05
A0AVT1	A0AVT1	5	5	5	Ubiquitin-like modifier-activating enzyme 6	UBA6		1	5	5	5	3	4	4	4	4	4	5	5	5	5	5	3	3	4	4	4	4	4	5	5	5	5	5	3	3	4	4	4	4	4	5	5	5	5	5	3	2021-07-07	2021-07-07
A0FGR8	A0FGR8	11	11	11	Extended synaptotagmin-2	ESYT2		1	11	11	11	6	8	7	8	8	7	6	8	6	9	6	10	6	8	7	8	8	7	6	8	6	9	6	10	6	8	7	8	8	7	6	8	6	9	6	10	2021-07-17	2021-07-17
A0MZ66	A0MZ66	5	5	5	Shootin-1	KIAA1598		1	5	5	5	2	3	5	5	5	4	4	5	5	5	5	5	2	3	5	5	5	4	4	5	5	5	5	5	2	3	5	5	5	4	4	5	5	5	5	5	2021-09-08	2021-09-08
A1L0T0	A1L0T0	5	5	5	Acetolactate synthase-like protein	ILVBL		1	5	5	5	4	3	2	3	5	5	3	4	2	5	4	4	4	3	2	3	5	5	3	4	2	5	4	4	4	3	2	3	5	5	3	4	2	5	4	4	2021-04-14	2021-04-14
A1X283;Q5TCZ1	A1X283;Q5TCZ1	2;1	2;1	2;1	SH3 and PX domain-containing protein 2B;SH3 and PX domain-containing protein 2A	SH3PXD2B;SH3PXD2A	;	2	2	2	2	2	2	2	1	2	2	2	2	2	1	2	2	2	2	2	1	2	2	2	2	2	1	2	2	2	2	2	1	2	2	2	2	2	1	2	2	2021-02-03	2021-02-03
A2RRP1	A2RRP1	3	3	3	Neuroblastoma-amplified sequence	NBAS		1	3	3	3	1	2	2	2	1	1	1	2	0	1	2	1	1	2	2	2	1	1	1	2	0	1	2	1	1	2	2	2	1	1	1	2	0	1	2	1	2021-05-01	2021-05-01
A2RUS2	A2RUS2	5	5	5	DENN domain-containing protein 3	DENND3		1	5	5	5	5	4	4	4	5	5	4	4	5	4	3	4	5	4	4	4	5	5	4	4	5	4	3	4	5	4	4	4	5	5	4	4	5	4	3	4	2021-01-07	2021-01-07
A4D1P6	A4D1P6	3	3	3	WD repeat-containing protein 91	WDR91		1	3	3	3	2	3	2	3	3	3	3	3	2	2	3	3	2	3	2	3	3	3	3	3	2	2	3	3	2	3	2	3	3	3	3	3	2	2	3	3	2021-08-04	2021-08-04
A5D8V7	A5D8V7	1	1	1	Coiled-coil domain-containing protein 151	CCDC151		1	1	1	1	0	1	1	1	1	1	1	1	1	1	1	1	0	1	1	1	1	1	1	1	1	1	1	1	0	1	1	1	1	1	1	1	1	1	1	1	2021-07-01	2021-07-01
A5PLN9	A5PLN9	1	1	1	Trafficking protein particle complex subunit 13	TRAPPC13		1	1	1	1	0	0	1	1	0	1	0	1	1	0	1	1	0	0	1	1	0	1	0	1	1	0	1	1	0	0	1	1	0	1	0	1	1	0	1	1	5	5
A5YKK6	A5YKK6	3	3	3	CCR4-NOT transcription complex subunit 1	CNOT1		1	3	3	3	0	1	1	2	1	2	1	2	1	0	3	1	0	1	1	2	1	2	1	2	1	0	3	1	0	1	1	2	1	2	1	2	1	0	3	1	2021-03-01	2021-03-01
A6NC86	A6NC86	2	2	2	phospholipase A2 inhibitor and Ly6/PLAUR domain-containing protein	PINLYP		1	2	2	2	2	1	2	1	2	2	2	2	1	1	1	1	2	1	2	1	2	2	2	2	1	1	1	1	2	1	2	1	2	2	2	2	1	1	1	1	2021-02-15	2021-02-15
A6NC98	A6NC98	4	4	4	Coiled-coil domain-containing protein 88B	CCDC88B		1	4	4	4	2	3	3	3	1	1	2	2	1	2	3	2	2	3	3	3	1	1	2	2	1	2	3	2	2	3	3	3	1	1	2	2	1	2	3	2	2021-05-03	2021-05-03
A6NDG6	A6NDG6	5	5	5	Phosphoglycolate phosphatase	PGP		1	5	5	5	4	4	4	4	4	4	4	4	5	4	4	5	4	4	4	4	4	4	4	4	5	4	4	5	4	4	4	4	4	4	4	4	5	4	4	5	2021-05-21	2021-05-21
A6NHR9	A6NHR9	5	5	5	Structural maintenance of chromosomes flexible hinge domain-containing protein 1	SMCHD1		1	5	5	5	3	3	3	4	2	4	2	2	3	3	2	5	3	3	3	4	2	4	2	2	3	3	2	5	3	3	3	4	2	4	2	2	3	3	2	5	2021-04-03	2021-04-03
P14598;A6NI72;A8MVU1	P14598;A6NI72;A8MVU1	10;10;8	10;10;8	10;10;8	Neutrophil cytosol factor 1;Putative neutrophil cytosol factor 1B;Putative neutrophil cytosol factor 1C	NCF1;NCF1B;NCF1C	;;	3	10	10	10	6	3	4	4	8	7	6	10	6	3	3	3	6	3	4	4	8	7	6	10	6	3	3	3	6	3	4	4	8	7	6	10	6	3	3	3	32.3	32.3
Q7Z3J3;A6NKT7	Q7Z3J3;A6NKT7	5;5	1;1	1;1	RanBP2-like and GRIP domain-containing protein 4;RanBP2-like and GRIP domain-containing protein 3	RGPD4;RGPD3	;	2	5	1	1	3	5	4	5	5	5	3	5	4	4	5	5	0	1	1	1	1	1	0	1	1	1	1	1	0	1	1	1	1	1	0	1	1	1	1	1	2021-09-03	0.7
Q9NQA3;C4AMC7;Q6VEQ5;A8K0Z3;A8MWX3	Q9NQA3;C4AMC7;Q6VEQ5;A8K0Z3;A8MWX3	1;1;1;1;1	1;1;1;1;1	1;1;1;1;1	WAS protein family homolog 6;Putative WAS protein family homolog 3;WAS protein family homolog 2;WAS protein family homolog 1;Putative WAS protein family homolog 4	WASH6P;WASH3P;WASH2P;WASH1;WASH4P	;;;;	5	1	1	1	1	1	1	1	1	1	1	1	1	1	1	1	1	1	1	1	1	1	1	1	1	1	1	1	1	1	1	1	1	1	1	1	1	1	1	1	2021-09-02	2021-09-02
P62308;A8MWD9	P62308;A8MWD9	2;2	2;2	2;2	Small nuclear ribonucleoprotein G;Putative small nuclear ribonucleoprotein G-like protein 15	SNRPG;SNRPGP15	;	2	2	2	2	2	2	2	2	2	2	2	2	2	2	1	2	2	2	2	2	2	2	2	2	2	2	1	2	2	2	2	2	2	2	2	2	2	2	1	2	2021-03-26	2021-03-26
B0I1T2	B0I1T2	6	6	6	Unconventional myosin-Ig;Minor histocompatibility antigen HA-2	MYO1G		1	6	6	6	5	4	4	5	4	3	3	4	4	3	6	3	5	4	4	5	4	3	3	4	4	3	6	3	5	4	4	5	4	3	3	4	4	3	6	3	2021-08-08	2021-08-08
CON__ENSEMBL:ENSBTAP00000007350;CON__P01030	CON__ENSEMBL:ENSBTAP00000007350;CON__P01030	6;5	6;5	6;5			;	2	6	6	6	3	4	4	5	4	5	4	4	4	6	3	5	3	4	4	5	4	5	4	4	4	6	3	5	3	4	4	5	4	5	4	4	4	6	3	5	2021-07-05	2021-07-05
CON__ENSEMBL:ENSBTAP00000024146	CON__ENSEMBL:ENSBTAP00000024146	10	10	10				1	10	10	10	6	6	5	7	6	9	4	3	6	7	6	7	6	6	5	7	6	9	4	3	6	7	6	7	6	6	5	7	6	9	4	3	6	7	6	7	2021-07-11	2021-07-11
CON__P00735	CON__P00735	1	1	1				1	1	1	1	1	1	0	1	1	1	1	1	1	1	1	1	1	1	0	1	1	1	1	1	1	1	1	1	1	1	0	1	1	1	1	1	1	1	1	1	2021-06-04	2021-06-04
CON__P00761	CON__P00761	8	8	8				1	8	8	8	8	8	7	8	8	8	8	8	8	8	8	7	8	8	7	8	8	8	8	8	8	8	8	7	8	8	7	8	8	8	8	8	8	8	8	7	2021-08-26	2021-08-26
CON__P00978	CON__P00978	2	2	2				1	2	2	2	1	0	1	1	1	2	1	0	0	1	0	0	1	0	1	1	1	2	1	0	0	1	0	0	1	0	1	1	1	2	1	0	0	1	0	0	2021-07-07	2021-07-07
CON__P01045-1;CON__Q2KJ62;CON__P01044-1	CON__P01045-1;CON__Q2KJ62;CON__P01044-1	1;1;1	1;1;1	1;1;1			;;	3	1	1	1	1	0	1	0	1	1	0	1	1	1	1	1	1	0	1	0	1	1	0	1	1	1	1	1	1	0	1	0	1	1	0	1	1	1	1	1	2021-01-03	2021-01-03
CON__P01966;P69905	CON__P01966	6;2	6;2	6;2				2	6	6	6	6	6	6	6	6	6	5	6	6	6	6	6	6	6	6	6	6	6	5	6	6	6	6	6	6	6	6	6	6	6	5	6	6	6	6	6	52.8	52.8
CON__P02769	CON__P02769	64	64	60				1	64	64	60	58	57	55	59	55	56	53	54	54	59	57	56	58	57	55	59	55	56	53	54	54	59	57	56	54	54	51	55	51	52	49	51	50	55	53	52	80.6	80.6
CON__P02777	CON__P02777	6	6	6				1	6	6	6	6	2	5	4	5	4	5	4	6	5	4	5	6	2	5	4	5	4	5	4	6	5	4	5	6	2	5	4	5	4	5	4	6	5	4	5	2021-06-19	2021-06-19
CON__P06868	CON__P06868	12	12	12				1	12	12	12	8	10	11	11	8	9	4	6	8	7	8	8	8	10	11	11	8	9	4	6	8	7	8	8	8	10	11	11	8	9	4	6	8	7	8	8	2021-06-21	2021-06-21
CON__P12763;P02765	CON__P12763	18;3	18;3	18;3				2	18	18	18	17	16	17	16	14	14	16	15	15	18	16	16	17	16	17	16	14	14	16	15	15	18	16	16	17	16	17	16	14	14	16	15	15	18	16	16	40.7	40.7
CON__P17690	CON__P17690	7	7	7				1	7	7	7	7	7	7	6	6	5	5	4	6	6	6	6	7	7	7	6	6	5	5	4	6	6	6	6	7	7	7	6	6	5	5	4	6	6	6	6	2021-04-30	2021-04-30
CON__P34955	CON__P34955	9	9	9				1	9	9	9	8	9	5	7	7	8	9	8	8	9	9	8	8	9	5	7	7	8	9	8	8	9	9	8	8	9	5	7	7	8	9	8	8	9	9	8	2021-04-26	2021-04-26
CON__Q8BGZ7;CON__P50446;CON__Q922U2;CON__Q5XQN5;CON__P04264;P04264	CON__Q8BGZ7;CON__P50446;CON__Q922U2;CON__Q5XQN5;CON__P04264;P04264	2;2;2;2;1;1	1;1;1;1;1;1	1;1;1;1;1;1	Keratin, type II cytoskeletal 1	KRT1	;;;;;	6	2	1	1	1	2	1	1	1	1	2	1	1	2	2	1	0	1	0	0	0	0	1	0	0	1	1	0	0	1	0	0	0	0	1	0	0	1	1	0	2021-04-03	2021-02-02
CON__P50448	CON__P50448	1	1	1				1	1	1	1	1	1	1	1	1	1	1	1	1	1	1	1	1	1	1	1	1	1	1	1	1	1	1	1	1	1	1	1	1	1	1	1	1	1	1	1	2021-04-03	2021-04-03
CON__Q29443;CON__Q0IIK2;P02788	CON__Q29443;CON__Q0IIK2	21;21;2	21;21;2	21;21;2			;	3	21	21	21	18	17	16	16	17	21	12	17	18	20	17	17	18	17	16	16	17	21	12	17	18	20	17	17	18	17	16	16	17	21	12	17	18	20	17	17	34	34
CON__Q2KJF1	CON__Q2KJF1	1	1	1				1	1	1	1	0	1	1	1	1	1	1	1	1	1	1	1	0	1	1	1	1	1	1	1	1	1	1	1	0	1	1	1	1	1	1	1	1	1	1	1	2021-06-02	2021-06-02
CON__Q2UVX4	CON__Q2UVX4	1	1	1				1	1	1	1	1	1	0	0	0	1	1	1	1	0	0	1	1	1	0	0	0	1	1	1	1	0	0	1	1	1	0	0	0	1	1	1	1	0	0	1	1	1
CON__Q3MHN5;CON__ENSEMBL:ENSBTAP00000018229	CON__Q3MHN5;CON__ENSEMBL:ENSBTAP00000018229	4;2	4;2	4;2			;	2	4	4	4	4	3	3	3	4	4	4	3	3	3	3	3	4	3	3	3	4	4	4	3	3	3	3	3	4	3	3	3	4	4	4	3	3	3	3	3	2021-04-12	2021-04-12
CON__Q3SX09;CON__P02070;P69892;P69891;P68871;P02100;P02042	CON__Q3SX09;CON__P02070	7;4;1;1;1;1;1	7;4;1;1;1;1;1	7;4;1;1;1;1;1			;	7	7	7	7	4	6	6	7	4	5	6	6	5	5	5	5	4	6	6	7	4	5	6	6	5	5	5	5	4	6	6	7	4	5	6	6	5	5	5	5	36.3	36.3
CON__Q3SX28;P07951	CON__Q3SX28;P07951	14;14	4;4	4;4	Tropomyosin beta chain	TPM2	;	2	14	4	4	8	12	10	11	10	10	12	12	10	12	11	8	1	2	2	2	1	1	2	2	2	3	1	1	1	2	2	2	1	1	2	2	2	3	1	1	32.4	2021-08-15
CON__Q3SZ57	CON__Q3SZ57	2	2	2				1	2	2	2	1	1	0	1	1	2	1	1	1	1	1	1	1	1	0	1	1	2	1	1	1	1	1	1	1	1	0	1	1	2	1	1	1	1	1	1	2021-07-05	2021-07-05
CON__Q3SZH5	CON__Q3SZH5	1	1	1				1	1	1	1	1	1	1	1	1	1	1	1	1	1	1	1	1	1	1	1	1	1	1	1	1	1	1	1	1	1	1	1	1	1	1	1	1	1	1	1	2021-03-03	2021-03-03
CON__Q3SZR3	CON__Q3SZR3	2	2	2				1	2	2	2	1	0	1	2	1	2	0	2	2	2	1	1	1	0	1	2	1	2	0	2	2	2	1	1	1	0	1	2	1	2	0	2	2	2	1	1	2021-08-16	2021-08-16
CON__Q3SZV7	CON__Q3SZV7	1	1	1				1	1	1	1	0	0	0	0	0	1	0	0	0	0	0	0	0	0	0	0	0	1	0	0	0	0	0	0	0	0	0	0	0	1	0	0	0	0	0	0	2	2
CON__Q3T052	CON__Q3T052	2	2	2				1	2	2	2	2	2	2	2	2	2	2	2	2	2	2	2	2	2	2	2	2	2	2	2	2	2	2	2	2	2	2	2	2	2	2	2	2	2	2	2	2021-06-03	2021-06-03
CON__Q3ZBD7	CON__Q3ZBD7	3	1	1				1	3	1	1	3	3	3	3	3	3	3	3	3	3	3	3	1	1	1	1	1	1	1	1	1	1	1	1	1	1	1	1	1	1	1	1	1	1	1	1	9	2021-08-04
CON__Q3ZBS7;P04004	CON__Q3ZBS7	7;2	7;2	7;2				2	7	7	7	5	7	6	7	7	7	6	7	6	6	6	6	5	7	6	7	7	7	6	7	6	6	6	6	5	7	6	7	7	7	6	7	6	6	6	6	2021-03-15	2021-03-15
CON__Q58D62	CON__Q58D62	1	1	1				1	1	1	1	0	1	1	1	1	1	1	0	1	1	1	1	0	1	1	1	1	1	1	0	1	1	1	1	0	1	1	1	1	1	1	0	1	1	1	1	2021-03-08	2021-03-08
CON__Q9TRI1;P19823	CON__Q9TRI1;P19823	2;1	2;1	2;1	Inter-alpha-trypsin inhibitor heavy chain H2	ITIH2	;	2	2	2	2	2	2	2	2	2	2	2	2	2	2	2	2	2	2	2	2	2	2	2	2	2	2	2	2	2	2	2	2	2	2	2	2	2	2	2	2	2021-07-03	2021-07-03
Q13765;E9PAV3;Q9BZK3	Q13765;E9PAV3	5;5;2	5;5;2	5;5;2	Nascent polypeptide-associated complex subunit alpha;Nascent polypeptide-associated complex subunit alpha, muscle-specific form	NACA	;	3	5	5	5	4	4	4	2	4	4	5	4	5	4	4	2	4	4	4	2	4	4	5	4	5	4	4	2	4	4	4	2	4	4	5	4	5	4	4	2	2021-08-28	2021-08-28
WP_010883370.1;HPPMICFE_00005	WP_010883370.1;HPPMICFE_00005	2;2	2;2	2;2			;	2	2	2	2	1	1	1	2	0	1	0	2	1	2	1	1	1	1	1	2	0	1	0	2	1	2	1	1	1	1	1	2	0	1	0	2	1	2	1	1	2021-08-06	2021-08-06
WP_010882865.1;HPPMICFE_00796	WP_010882865.1;HPPMICFE_00796	1;1	1;1	1;1			;	2	1	1	1	1	1	1	1	1	1	1	1	1	1	1	1	1	1	1	1	1	1	1	1	1	1	1	1	1	1	1	1	1	1	1	1	1	1	1	1	2021-07-01	2021-07-01
L0R6Q1	L0R6Q1	1	1	1		SLC35A4		1	1	1	1	0	1	1	1	1	1	1	1	1	1	1	1	0	1	1	1	1	1	1	1	1	1	1	1	0	1	1	1	1	1	1	1	1	1	1	1	2021-07-09	2021-07-09
O00115	O00115	5	5	5	Deoxyribonuclease-2-alpha	DNASE2		1	5	5	5	2	4	4	3	3	4	3	4	3	4	4	3	2	4	4	3	3	4	3	4	3	4	4	3	2	4	4	3	3	4	3	4	3	4	4	3	2021-08-15	2021-08-15
O00116	O00116	11	11	11	Alkyldihydroxyacetonephosphate synthase, peroxisomal	AGPS		1	11	11	11	7	10	7	10	10	10	7	10	9	10	10	9	7	10	7	10	10	10	7	10	9	10	10	9	7	10	7	10	10	10	7	10	9	10	10	9	2021-08-25	2021-08-25
O00139	O00139	4	4	4	Kinesin-like protein KIF2A	KIF2A		1	4	4	4	3	3	4	3	3	3	3	3	3	3	4	4	3	3	4	3	3	3	3	3	3	3	4	4	3	3	4	3	3	3	3	3	3	3	4	4	2021-02-07	2021-02-07
O00148	O00148	15	4	4	ATP-dependent RNA helicase DDX39A	DDX39A		1	15	4	4	14	14	14	14	15	13	14	14	14	12	13	12	4	4	4	4	4	3	3	3	4	3	4	3	4	4	4	4	4	3	3	3	4	3	4	3	42.9	2021-08-17
O00151	O00151	7	7	7	PDZ and LIM domain protein 1	PDLIM1		1	7	7	7	3	5	5	6	5	6	1	4	5	6	6	5	3	5	5	6	5	6	1	4	5	6	6	5	3	5	5	6	5	6	1	4	5	6	6	5	43.8	43.8
O00154	O00154	1	1	1	Cytosolic acyl coenzyme A thioester hydrolase	ACOT7		1	1	1	1	1	1	1	1	1	1	1	1	1	1	1	1	1	1	1	1	1	1	1	1	1	1	1	1	1	1	1	1	1	1	1	1	1	1	1	1	2021-09-02	2021-09-02
O00159	O00159	3	3	3	Unconventional myosin-Ic	MYO1C		1	3	3	3	3	2	2	3	2	3	3	3	3	3	2	3	3	2	2	3	2	3	3	3	3	3	2	3	3	2	2	3	2	3	3	3	3	3	2	3	4	4
O00160	O00160	28	28	24	Unconventional myosin-If	MYO1F		1	28	28	24	23	24	21	26	27	26	21	26	25	27	26	27	23	24	21	26	27	26	21	26	25	27	26	27	19	20	18	22	23	22	17	22	21	23	22	23	2021-03-27	2021-03-27
O00161	O00161	3	3	3	Synaptosomal-associated protein 23	SNAP23		1	3	3	3	2	2	3	3	3	3	2	3	3	2	2	3	2	2	3	3	3	3	2	3	3	2	2	3	2	2	3	3	3	3	2	3	3	2	2	3	19	19
O00170	O00170	6	6	6	AH receptor-interacting protein	AIP		1	6	6	6	5	5	4	6	6	5	4	5	5	5	5	6	5	5	4	6	6	5	4	5	5	5	5	6	5	5	4	6	6	5	4	5	5	5	5	6	2021-09-23	2021-09-23
O00178	O00178	3	3	3	GTP-binding protein 1	GTPBP1		1	3	3	3	3	2	3	2	3	3	3	3	3	3	2	2	3	2	3	2	3	3	3	3	3	3	2	2	3	2	3	2	3	3	3	3	3	3	2	2	2021-08-05	2021-08-05
O00182;Q6DKI2;Q3B8N2	O00182	7;3;3	7;3;3	7;3;3	Galectin-9	LGALS9		3	7	7	7	7	7	7	7	7	7	7	7	7	7	7	7	7	7	7	7	7	7	7	7	7	7	7	7	7	7	7	7	7	7	7	7	7	7	7	7	2021-02-24	2021-02-24
O00186	O00186	8	8	8	Syntaxin-binding protein 3	STXBP3		1	8	8	8	6	8	6	6	6	6	4	7	7	7	7	7	6	8	6	6	6	6	4	7	7	7	7	7	6	8	6	6	6	6	4	7	7	7	7	7	2021-09-17	2021-09-17
O00193	O00193	1	1	1	Small acidic protein	SMAP		1	1	1	1	1	1	0	1	1	1	0	1	1	1	1	1	1	1	0	1	1	1	0	1	1	1	1	1	1	1	0	1	1	1	0	1	1	1	1	1	2021-06-12	2021-06-12
O00203;Q13367	O00203	4;1	4;1	4;1	AP-3 complex subunit beta-1	AP3B1		2	4	4	4	3	4	4	3	3	3	3	3	4	3	4	3	3	4	4	3	3	3	3	3	4	3	4	3	3	4	4	3	3	3	3	3	4	3	4	3	2021-01-05	2021-01-05
O00217	O00217	2	2	2	NADH dehydrogenase [ubiquinone] iron-sulfur protein 8, mitochondrial	NDUFS8		1	2	2	2	1	2	1	2	0	0	1	1	0	1	1	1	1	2	1	2	0	0	1	1	0	1	1	1	1	2	1	2	0	0	1	1	0	1	1	1	2021-09-12	2021-09-12
O00231	O00231	16	16	16	26S proteasome non-ATPase regulatory subunit 11	PSMD11		1	16	16	16	12	14	12	14	14	13	15	14	14	14	16	13	12	14	12	14	14	13	15	14	14	14	16	13	12	14	12	14	14	13	15	14	14	14	16	13	39.6	39.6
O00232	O00232	7	7	7	26S proteasome non-ATPase regulatory subunit 12	PSMD12		1	7	7	7	5	5	6	5	7	7	3	5	5	7	5	6	5	5	6	5	7	7	3	5	5	7	5	6	5	5	6	5	7	7	3	5	5	7	5	6	2021-08-20	2021-08-20
O00233	O00233	3	3	3	26S proteasome non-ATPase regulatory subunit 9	PSMD9		1	3	3	3	2	3	2	3	2	2	2	3	3	3	3	3	2	3	2	3	2	2	2	3	3	3	3	3	2	3	2	3	2	2	2	3	3	3	3	3	13	13
O00244	O00244	2	2	2	Copper transport protein ATOX1	ATOX1		1	2	2	2	2	2	2	2	2	2	2	2	2	2	2	2	2	2	2	2	2	2	2	2	2	2	2	2	2	2	2	2	2	2	2	2	2	2	2	2	2021-05-26	2021-05-26
O00264	O00264	3	3	3	Membrane-associated progesterone receptor component 1	PGRMC1		1	3	3	3	1	3	1	1	2	2	1	1	2	3	2	1	1	3	1	1	2	2	1	1	2	3	2	1	1	3	1	1	2	2	1	1	2	3	2	1	2021-08-11	2021-08-11
O00267	O00267	4	4	4	Transcription elongation factor SPT5	SUPT5H		1	4	4	4	4	4	2	3	4	4	3	4	3	4	4	4	4	4	2	3	4	4	3	4	3	4	4	4	4	4	2	3	4	4	3	4	3	4	4	4	7	7
O00273	O00273	2	2	2	DNA fragmentation factor subunit alpha	DFFA		1	2	2	2	2	1	1	1	2	1	0	2	2	2	2	1	2	1	1	1	2	1	0	2	2	2	2	1	2	1	1	1	2	1	0	2	2	2	2	1	2021-01-09	2021-01-09
O00299	O00299	22	22	22	Chloride intracellular channel protein 1	CLIC1		1	22	22	22	22	22	20	22	22	22	22	22	22	22	22	22	22	22	20	22	22	22	22	22	22	22	22	22	22	22	20	22	22	22	22	22	22	22	22	22	75.1	75.1
O00303	O00303	8	8	8	Eukaryotic translation initiation factor 3 subunit F	EIF3F		1	8	8	8	6	7	6	7	7	7	7	7	6	7	7	6	6	7	6	7	7	7	7	7	6	7	7	6	6	7	6	7	7	7	7	7	6	7	7	6	2021-05-27	2021-05-27
O00329	O00329	2	2	2	Phosphatidylinositol 4,5-bisphosphate 3-kinase catalytic subunit delta isoform	PIK3CD		1	2	2	2	2	2	1	2	2	2	2	2	2	2	2	2	2	2	1	2	2	2	2	2	2	2	2	2	2	2	1	2	2	2	2	2	2	2	2	2	2021-06-04	2021-06-04
O00330	O00330	5	5	5	Pyruvate dehydrogenase protein X component, mitochondrial	PDHX		1	5	5	5	3	5	4	4	4	3	2	4	3	4	5	4	3	5	4	4	4	3	2	4	3	4	5	4	3	5	4	4	4	3	2	4	3	4	5	4	2021-02-13	2021-02-13
O00410	O00410	2	2	2	Importin-5	IPO5		1	2	2	2	1	2	0	1	1	0	1	2	1	1	1	1	1	2	0	1	1	0	1	2	1	1	1	1	1	2	0	1	1	0	1	2	1	1	1	1	2021-09-03	2021-09-03
O00422	O00422	3	3	3	Histone deacetylase complex subunit SAP18	SAP18		1	3	3	3	2	2	2	3	3	3	1	1	2	2	3	1	2	2	2	3	3	3	1	1	2	2	3	1	2	2	2	3	3	3	1	1	2	2	3	1	2021-06-17	2021-06-17
O00425	O00425	1	1	1	Insulin-like growth factor 2 mRNA-binding protein 3	IGF2BP3		1	1	1	1	1	1	1	1	1	1	1	1	1	1	1	1	1	1	1	1	1	1	1	1	1	1	1	1	1	1	1	1	1	1	1	1	1	1	1	1	2021-04-02	2021-04-02
O00429	O00429	11	11	11	Dynamin-1-like protein	DNM1L		1	11	11	11	9	10	6	10	10	10	9	11	10	10	11	8	9	10	6	10	10	10	9	11	10	10	11	8	9	10	6	10	10	10	9	11	10	10	11	8	22	22
O00442	O00442	5	5	5	RNA 3-terminal phosphate cyclase	RTCA		1	5	5	5	5	4	5	4	4	5	5	4	4	5	5	4	5	4	5	4	4	5	5	4	4	5	5	4	5	4	5	4	4	5	5	4	4	5	5	4	2021-09-18	2021-09-18
O00483	O00483	2	2	2	Cytochrome c oxidase subunit NDUFA4	NDUFA4		1	2	2	2	2	2	2	2	2	2	2	2	2	2	2	2	2	2	2	2	2	2	2	2	2	2	2	2	2	2	2	2	2	2	2	2	2	2	2	2	2021-08-19	2021-08-19
O00487	O00487	5	5	5	26S proteasome non-ATPase regulatory subunit 14	PSMD14		1	5	5	5	4	4	4	4	4	5	3	4	5	4	4	5	4	4	4	4	4	5	3	4	5	4	4	5	4	4	4	4	4	5	3	4	5	4	4	5	2021-01-27	2021-01-27
O00499	O00499	3	3	3	Myc box-dependent-interacting protein 1	BIN1		1	3	3	3	2	3	2	3	2	2	2	3	3	3	3	2	2	3	2	3	2	2	2	3	3	3	3	2	2	3	2	3	2	2	2	3	3	3	3	2	2021-08-08	2021-08-08
O00505	O00505	6	6	4	Importin subunit alpha-4	KPNA3		1	6	6	4	6	6	4	5	6	6	4	6	5	6	6	6	6	6	4	5	6	6	4	6	5	6	6	6	4	4	2	4	4	4	2	4	3	4	4	4	2021-06-18	2021-06-18
O00541	O00541	3	3	3	Pescadillo homolog	PES1		1	3	3	3	2	2	2	2	2	3	2	3	3	3	3	3	2	2	2	2	2	3	2	3	3	3	3	3	2	2	2	2	2	3	2	3	3	3	3	3	2021-05-07	2021-05-07
O00560	O00560	9	9	9	Syntenin-1	SDCBP		1	9	9	9	8	9	7	9	7	9	6	8	8	8	7	6	8	9	7	9	7	9	6	8	8	8	7	6	8	9	7	9	7	9	6	8	8	8	7	6	34.2	34.2
O00567	O00567	7	7	7	Nucleolar protein 56	NOP56		1	7	7	7	3	4	5	6	4	5	2	4	3	5	6	4	3	4	5	6	4	5	2	4	3	5	6	4	3	4	5	6	4	5	2	4	3	5	6	4	2021-02-16	2021-02-16
O00571;Q9NQI0	O00571	29;2	28;2	8;0	ATP-dependent RNA helicase DDX3X	DDX3X		2	29	28	8	24	25	22	24	23	24	22	24	24	25	23	24	23	24	21	23	22	23	21	23	23	24	22	23	6	8	6	6	6	6	5	5	7	5	6	7	45.6	44
O00584	O00584	8	8	8	Ribonuclease T2	RNASET2		1	8	8	8	7	7	6	7	6	7	6	7	7	7	8	8	7	7	6	7	6	7	6	7	7	7	8	8	7	7	6	7	6	7	6	7	7	7	8	8	38.3	38.3
O00625	O00625	1	1	1	Pirin	PIR		1	1	1	1	1	1	0	1	1	0	0	1	1	1	1	0	1	1	0	1	1	0	0	1	1	1	1	0	1	1	0	1	1	0	0	1	1	1	1	0	2021-01-04	2021-01-04
O00629	O00629	3	1	1	Importin subunit alpha-3	KPNA4		1	3	1	1	3	3	3	2	3	3	3	3	3	3	3	3	1	1	1	1	1	1	1	1	1	1	1	1	1	1	1	1	1	1	1	1	1	1	1	1	5	2021-09-01
O00743	O00743	3	3	3	Serine/threonine-protein phosphatase 6 catalytic subunit;Serine/threonine-protein phosphatase 6 catalytic subunit, N-terminally processed	PPP6C		1	3	3	3	2	3	2	3	2	2	2	1	2	3	3	2	2	3	2	3	2	2	2	1	2	3	3	2	2	3	2	3	2	2	2	1	2	3	3	2	2021-04-15	2021-04-15
O00754	O00754	25	25	25	Lysosomal alpha-mannosidase;Lysosomal alpha-mannosidase A peptide;Lysosomal alpha-mannosidase B peptide;Lysosomal alpha-mannosidase C peptide;Lysosomal alpha-mannosidase D peptide;Lysosomal alpha-mannosidase E peptide	MAN2B1		1	25	25	25	20	21	21	23	18	23	23	21	22	20	19	17	20	21	21	23	18	23	23	21	22	20	19	17	20	21	21	23	18	23	23	21	22	20	19	17	32.3	32.3
O00764	O00764	8	8	8	Pyridoxal kinase	PDXK		1	8	8	8	7	7	4	6	6	7	6	6	7	6	7	7	7	7	4	6	6	7	6	6	7	6	7	7	7	7	4	6	6	7	6	6	7	6	7	7	2021-09-26	2021-09-26
O14523	O14523	2	2	2	C2 domain-containing protein 2-like	C2CD2L		1	2	2	2	1	2	2	2	1	1	1	2	1	1	2	0	1	2	2	2	1	1	1	2	1	1	2	0	1	2	2	2	1	1	1	2	1	1	2	0	2021-01-05	2021-01-05
O14530	O14530	3	3	3	Thioredoxin domain-containing protein 9	TXNDC9		1	3	3	3	1	3	1	3	3	1	0	1	2	2	1	0	1	3	1	3	3	1	0	1	2	2	1	0	1	3	1	3	3	1	0	1	2	2	1	0	2021-02-10	2021-02-10
O14548	O14548	2	2	2	Cytochrome c oxidase subunit 7A-related protein, mitochondrial	COX7A2L		1	2	2	2	1	2	2	2	2	2	1	2	2	2	2	2	1	2	2	2	2	2	1	2	2	2	2	2	1	2	2	2	2	2	1	2	2	2	2	2	40.4	40.4
O14578	O14578	2	2	2	Citron Rho-interacting kinase	CIT		1	2	2	2	1	1	1	1	1	1	1	1	1	1	2	1	1	1	1	1	1	1	1	1	1	1	2	1	1	1	1	1	1	1	1	1	1	1	2	1	2021-01-01	2021-01-01
O14579	O14579	6	6	6	Coatomer subunit epsilon	COPE		1	6	6	6	6	5	6	6	6	6	5	6	6	6	6	6	6	5	6	6	6	6	5	6	6	6	6	6	6	5	6	6	6	6	5	6	6	6	6	6	30.2	30.2
P47813;O14602	P47813;O14602	2;2	2;2	2;2	Eukaryotic translation initiation factor 1A, X-chromosomal;Eukaryotic translation initiation factor 1A, Y-chromosomal	EIF1AX;EIF1AY	;	2	2	2	2	2	2	2	2	2	2	2	2	2	2	2	2	2	2	2	2	2	2	2	2	2	2	2	2	2	2	2	2	2	2	2	2	2	2	2	2	2021-02-22	2021-02-22
O14617	O14617	7	7	7	AP-3 complex subunit delta-1	AP3D1		1	7	7	7	3	6	4	4	3	4	2	5	6	6	5	6	3	6	4	4	3	4	2	5	6	6	5	6	3	6	4	4	3	4	2	5	6	6	5	6	2021-03-11	2021-03-11
O14618	O14618	3	3	3	Copper chaperone for superoxide dismutase	CCS		1	3	3	3	2	2	2	2	2	1	0	2	1	1	1	3	2	2	2	2	2	1	0	2	1	1	1	3	2	2	2	2	2	1	0	2	1	1	1	3	2021-08-20	2021-08-20
O14662	O14662	2	2	2	Syntaxin-16	STX16		1	2	2	2	1	0	2	0	1	1	0	1	2	1	1	1	1	0	2	0	1	1	0	1	2	1	1	1	1	0	2	0	1	1	0	1	2	1	1	1	2021-01-03	2021-01-03
O14672	O14672	4	4	4	Disintegrin and metalloproteinase domain-containing protein 10	ADAM10		1	4	4	4	4	4	3	4	4	4	3	4	3	3	4	3	4	4	3	4	4	4	3	4	3	3	4	3	4	4	3	4	4	4	3	4	3	3	4	3	2021-01-07	2021-01-07
O14737	O14737	7	7	7	Programmed cell death protein 5	PDCD5		1	7	7	7	6	5	5	6	6	7	6	6	6	5	5	6	6	5	5	6	6	7	6	6	6	5	5	6	6	5	5	6	6	7	6	6	6	5	5	6	56	56
O14744	O14744	6	6	6	Protein arginine N-methyltransferase 5;Protein arginine N-methyltransferase 5, N-terminally processed	PRMT5		1	6	6	6	3	5	5	5	6	6	4	6	5	6	6	4	3	5	5	5	6	6	4	6	5	6	6	4	3	5	5	5	6	6	4	6	5	6	6	4	2021-09-14	2021-09-14
O14773	O14773	11	11	11	Tripeptidyl-peptidase 1	TPP1		1	11	11	11	9	9	8	9	10	10	10	10	10	10	9	9	9	9	8	9	10	10	10	10	10	10	9	9	9	9	8	9	10	10	10	10	10	10	9	9	34.6	34.6
O14776	O14776	5	5	5	Transcription elongation regulator 1	TCERG1		1	5	5	5	3	3	4	3	2	3	1	4	2	4	3	5	3	3	4	3	2	3	1	4	2	4	3	5	3	3	4	3	2	3	1	4	2	4	3	5	2021-01-05	2021-01-05
O14786	O14786	6	6	6	Neuropilin-1	NRP1		1	6	6	6	4	5	1	2	6	5	5	6	6	5	4	4	4	5	1	2	6	5	5	6	6	5	4	4	4	5	1	2	6	5	5	6	6	5	4	4	2021-01-11	2021-01-11
O14818;Q8TAA3	O14818	12;5	12;5	12;5	Proteasome subunit alpha type-7	PSMA7		2	12	12	12	9	11	8	10	11	12	10	11	11	12	11	10	9	11	8	10	11	12	10	11	11	12	11	10	9	11	8	10	11	12	10	11	11	12	11	10	58.9	58.9
O14828	O14828	7	7	7	Secretory carrier-associated membrane protein 3	SCAMP3		1	7	7	7	6	6	6	7	6	6	5	6	6	7	7	6	6	6	6	7	6	6	5	6	6	7	7	6	6	6	6	7	6	6	5	6	6	7	7	6	2021-07-29	2021-07-29
O14841	O14841	6	6	6	5-oxoprolinase	OPLAH		1	6	6	6	3	3	3	2	4	3	3	5	4	4	4	3	3	3	3	2	4	3	3	5	4	4	4	3	3	3	3	2	4	3	3	5	4	4	4	3	2021-02-08	2021-02-08
O14920;O15111	O14920	3;1	3;1	3;1	Inhibitor of nuclear factor kappa-B kinase subunit beta	IKBKB		2	3	3	3	1	1	2	3	3	3	3	1	3	2	3	2	1	1	2	3	3	3	3	1	3	2	3	2	1	1	2	3	3	3	3	1	3	2	3	2	2021-07-03	2021-07-03
O14929	O14929	3	3	3	Histone acetyltransferase type B catalytic subunit	HAT1		1	3	3	3	1	2	1	3	2	1	2	2	2	3	2	2	1	2	1	3	2	1	2	2	2	3	2	2	1	2	1	3	2	1	2	2	2	3	2	2	2021-05-11	2021-05-11
O14949	O14949	4	4	4	Cytochrome b-c1 complex subunit 8	UQCRQ		1	4	4	4	4	4	3	4	3	4	2	3	3	4	3	3	4	4	3	4	3	4	2	3	3	4	3	3	4	4	3	4	3	4	2	3	3	4	3	3	39	39
P19105;O14950	P19105;O14950	6;6	6;6	4;4	Myosin regulatory light chain 12A;Myosin regulatory light chain 12B	MYL12A;MYL12B	;	2	6	6	4	4	5	5	6	5	6	5	6	4	6	4	3	4	5	5	6	5	6	5	6	4	6	4	3	3	3	3	4	3	4	3	4	3	4	2	2	39.2	39.2
O14964	O14964	1	1	1	Hepatocyte growth factor-regulated tyrosine kinase substrate	HGS		1	1	1	1	1	1	1	1	1	1	1	1	1	1	1	1	1	1	1	1	1	1	1	1	1	1	1	1	1	1	1	1	1	1	1	1	1	1	1	1	2021-05-01	2021-05-01
O14972	O14972	2	2	2	Down syndrome critical region protein 3	DSCR3		1	2	2	2	0	1	1	0	0	1	0	1	1	1	1	0	0	1	1	0	0	1	0	1	1	1	1	0	0	1	1	0	0	1	0	1	1	1	1	0	2021-01-08	2021-01-08
O14976	O14976	5	5	5	Cyclin-G-associated kinase	GAK		1	5	5	5	4	4	2	4	3	2	3	5	4	5	5	3	4	4	2	4	3	2	3	5	4	5	5	3	4	4	2	4	3	2	3	5	4	5	5	3	2021-09-06	2021-09-06
O14979	O14979	8	7	7	Heterogeneous nuclear ribonucleoprotein D-like	HNRNPDL		1	8	7	7	8	8	6	7	7	7	6	7	4	7	7	7	7	7	5	6	6	6	5	6	3	6	6	6	7	7	5	6	6	6	5	6	3	6	6	6	2021-02-20	2021-03-18
O14980	O14980	10	10	10	Exportin-1	XPO1		1	10	10	10	8	8	8	9	8	8	6	8	8	10	10	9	8	8	8	9	8	8	6	8	8	10	10	9	8	8	8	9	8	8	6	8	8	10	10	9	2021-06-14	2021-06-14
O15027	O15027	7	7	7	Protein transport protein Sec16A	SEC16A		1	7	7	7	6	5	5	6	7	5	5	6	6	5	5	6	6	5	5	6	7	5	5	6	6	5	5	6	6	5	5	6	7	5	5	6	6	5	5	6	2021-07-05	2021-07-05
O15031	O15031	12	12	12	Plexin-B2	PLXNB2		1	12	12	12	7	10	9	10	11	9	7	9	10	10	10	9	7	10	9	10	11	9	7	9	10	10	10	9	7	10	9	10	11	9	7	9	10	10	10	9	2021-07-09	2021-07-09
O15042	O15042	4	4	4	U2 snRNP-associated SURP motif-containing protein	U2SURP		1	4	4	4	3	4	2	2	4	3	1	2	3	3	4	4	3	4	2	2	4	3	1	2	3	3	4	4	3	4	2	2	4	3	1	2	3	3	4	4	2021-01-06	2021-01-06
O15067	O15067	2	2	2	Phosphoribosylformylglycinamidine synthase	PFAS		1	2	2	2	2	2	1	1	1	2	1	2	2	2	2	2	2	2	1	1	1	2	1	2	2	2	2	2	2	2	1	1	1	2	1	2	2	2	2	2	2021-07-03	2021-07-03
O15116	O15116	1	1	1	U6 snRNA-associated Sm-like protein LSm1	LSM1		1	1	1	1	1	1	1	1	1	1	1	1	1	1	1	1	1	1	1	1	1	1	1	1	1	1	1	1	1	1	1	1	1	1	1	1	1	1	1	1	12	12
O15118	O15118	6	6	6	Niemann-Pick C1 protein	NPC1		1	6	6	6	2	4	5	5	3	5	3	3	4	3	4	3	2	4	5	5	3	5	3	3	4	3	4	3	2	4	5	5	3	5	3	3	4	3	4	3	2021-06-05	2021-06-05
O15126	O15126	3	3	3	Secretory carrier-associated membrane protein 1	SCAMP1		1	3	3	3	2	3	3	3	3	3	1	3	2	3	3	3	2	3	3	3	3	3	1	3	2	3	3	3	2	3	3	3	3	3	1	3	2	3	3	3	2021-08-14	2021-08-14
O15127	O15127	3	3	3	Secretory carrier-associated membrane protein 2	SCAMP2		1	3	3	3	3	3	3	3	3	3	3	3	3	3	3	3	3	3	3	3	3	3	3	3	3	3	3	3	3	3	3	3	3	3	3	3	3	3	3	3	2021-07-13	2021-07-13
O15143	O15143	16	16	15	Actin-related protein 2/3 complex subunit 1B	ARPC1B		1	16	16	15	14	14	12	14	14	14	14	15	14	14	15	15	14	14	12	14	14	14	14	15	14	14	15	15	14	13	12	13	14	13	14	14	14	13	14	14	50.3	50.3
O15144	O15144	20	20	20	Actin-related protein 2/3 complex subunit 2	ARPC2		1	20	20	20	14	19	12	17	16	16	14	17	15	18	18	16	14	19	12	17	16	16	14	17	15	18	18	16	14	19	12	17	16	16	14	17	15	18	18	16	66.3	66.3
O15145	O15145	14	14	14	Actin-related protein 2/3 complex subunit 3	ARPC3		1	14	14	14	13	11	11	14	13	12	12	14	13	14	13	13	13	11	11	14	13	12	12	14	13	14	13	13	13	11	11	14	13	12	12	14	13	14	13	13	70.8	70.8
O15160	O15160	2	2	2	DNA-directed RNA polymerases I and III subunit RPAC1	POLR1C		1	2	2	2	2	2	2	2	2	2	2	2	2	2	2	2	2	2	2	2	2	2	2	2	2	2	2	2	2	2	2	2	2	2	2	2	2	2	2	2	2021-02-09	2021-02-09
O15173	O15173	3	3	3	Membrane-associated progesterone receptor component 2	PGRMC2		1	3	3	3	1	3	3	2	1	2	2	1	1	3	2	2	1	3	3	2	1	2	2	1	1	3	2	2	1	3	3	2	1	2	2	1	1	3	2	2	2021-04-18	2021-04-18
P84022;Q15796;O15198;Q99717;Q15797	P84022;Q15796;O15198;Q99717;Q15797	2;2;2;1;1	2;2;2;1;1	2;2;2;1;1	Mothers against decapentaplegic homolog 3;Mothers against decapentaplegic homolog 2;Mothers against decapentaplegic homolog 9;Mothers against decapentaplegic homolog 5;Mothers against decapentaplegic homolog 1	SMAD3;SMAD2;SMAD9;SMAD5;SMAD1	;;;;	5	2	2	2	1	1	2	2	1	0	0	2	1	1	1	2	1	1	2	2	1	0	0	2	1	1	1	2	1	1	2	2	1	0	0	2	1	1	1	2	2021-06-05	2021-06-05
O15212	O15212	7	7	7	Prefoldin subunit 6	PFDN6		1	7	7	7	6	6	5	7	7	7	4	6	6	7	7	7	6	6	5	7	7	7	4	6	6	7	7	7	6	6	5	7	7	7	4	6	6	7	7	7	48.8	48.8
O15254	O15254	5	5	5	Peroxisomal acyl-coenzyme A oxidase 3	ACOX3		1	5	5	5	2	3	4	4	3	4	2	4	4	4	2	3	2	3	4	4	3	4	2	4	4	4	2	3	2	3	4	4	3	4	2	4	4	4	2	3	2021-06-10	2021-06-10
O15269	O15269	2	2	2	Serine palmitoyltransferase 1	SPTLC1		1	2	2	2	2	1	2	1	1	1	1	1	1	1	1	1	2	1	2	1	1	1	1	1	1	1	1	1	2	1	2	1	1	1	1	1	1	1	1	1	2021-09-05	2021-09-05
O15294	O15294	4	4	4	UDP-N-acetylglucosamine--peptide N-acetylglucosaminyltransferase 110 kDa subunit	OGT		1	4	4	4	2	2	2	4	4	3	1	4	3	4	3	2	2	2	2	4	4	3	1	4	3	4	3	2	2	2	2	4	4	3	1	4	3	4	3	2	2021-01-05	2021-01-05
O15305	O15305	1	1	1	Phosphomannomutase 2	PMM2		1	1	1	1	1	1	1	1	1	0	0	0	0	1	1	0	1	1	1	1	1	0	0	0	0	1	1	0	1	1	1	1	1	0	0	0	0	1	1	0	2021-01-08	2021-01-08
O15320;Q96PC5;Q8IX94;Q86UF2;P0CG41;A4FU28;A4D2H0	O15320;Q96PC5	3;3;1;1;1;1;1	3;3;1;1;1;1;1	3;3;1;1;1;1;1	cTAGE family member 5;Melanoma inhibitory activity protein 2	CTAGE5;MIA2	;	7	3	3	3	1	1	2	2	2	1	0	2	3	0	0	2	1	1	2	2	2	1	0	2	3	0	0	2	1	1	2	2	2	1	0	2	3	0	0	2	2021-07-05	2021-07-05
O15321	O15321	1	1	1	Transmembrane 9 superfamily member 1	TM9SF1		1	1	1	1	0	0	1	1	0	0	1	1	0	1	0	0	0	0	1	1	0	0	1	1	0	1	0	0	0	0	1	1	0	0	1	1	0	1	0	0	2021-08-01	2021-08-01
O15347	O15347	5	5	5	High mobility group protein B3	HMGB3		1	5	5	5	5	3	4	4	5	5	5	5	5	3	4	4	5	3	4	4	5	5	5	5	5	3	4	4	5	3	4	4	5	5	5	5	5	3	4	4	2021-05-23	2021-05-23
O15355	O15355	11	11	11	Protein phosphatase 1G	PPM1G		1	11	11	11	7	8	10	9	10	10	7	10	11	10	9	10	7	8	10	9	10	10	7	10	11	10	9	10	7	8	10	9	10	10	7	10	11	10	9	10	2021-04-26	2021-04-26
O15357	O15357	9	8	8	Phosphatidylinositol 3,4,5-trisphosphate 5-phosphatase 2	INPPL1		1	9	8	8	7	6	6	6	4	6	3	8	8	7	4	6	6	5	5	5	3	5	3	7	7	6	3	5	6	5	5	5	3	5	3	7	7	6	3	5	2021-02-09	2021-02-09
O15371	O15371	10	10	10	Eukaryotic translation initiation factor 3 subunit D	EIF3D		1	10	10	10	9	8	9	10	8	9	7	9	8	9	10	9	9	8	9	10	8	9	7	9	8	9	10	9	9	8	9	10	8	9	7	9	8	9	10	9	2021-08-26	2021-08-26
O15372	O15372	4	4	4	Eukaryotic translation initiation factor 3 subunit H	EIF3H		1	4	4	4	3	3	3	3	3	4	3	4	3	3	2	4	3	3	3	3	3	4	3	4	3	3	2	4	3	3	3	3	3	4	3	4	3	3	2	4	2021-08-14	2021-08-14
O15381	O15381	2	2	2	Nuclear valosin-containing protein-like	NVL		1	2	2	2	2	2	2	1	0	1	2	2	2	2	1	1	2	2	2	1	0	1	2	2	2	2	1	1	2	2	2	1	0	1	2	2	2	2	1	1	2021-03-04	2021-03-04
O15382	O15382	2	2	2	Branched-chain-amino-acid aminotransferase, mitochondrial	BCAT2		1	2	2	2	1	2	0	2	1	1	1	2	1	1	2	1	1	2	0	2	1	1	1	2	1	1	2	1	1	2	0	2	1	1	1	2	1	1	2	1	11	11
O15400	O15400	6	6	6	Syntaxin-7	STX7		1	6	6	6	3	5	4	5	3	5	2	4	3	3	4	4	3	5	4	5	3	5	2	4	3	3	4	4	3	5	4	5	3	5	2	4	3	3	4	4	34.5	34.5
O15427	O15427	4	4	4	Monocarboxylate transporter 4	SLC16A3		1	4	4	4	3	2	2	0	3	3	3	2	3	3	4	3	3	2	2	0	3	3	3	2	3	3	4	3	3	2	2	0	3	3	3	2	3	3	4	3	2021-08-08	2021-08-08
O15511	O15511	7	7	7	Actin-related protein 2/3 complex subunit 5	ARPC5		1	7	7	7	7	6	6	6	6	7	6	7	7	6	7	6	7	6	6	6	6	7	6	7	7	6	7	6	7	6	6	6	6	7	6	7	7	6	7	6	67.5	67.5
O15523	O15523	26	5	5	ATP-dependent RNA helicase DDX3Y	DDX3Y		1	26	5	5	22	21	20	22	22	23	21	24	21	24	21	22	4	4	4	4	5	5	4	5	4	4	4	5	4	4	4	4	5	5	4	5	4	4	4	5	44.5	2021-08-11
O15533	O15533	4	4	4	Tapasin	TAPBP		1	4	4	4	4	3	4	3	4	4	4	4	4	3	3	4	4	3	4	3	4	4	4	4	4	3	3	4	4	3	4	3	4	4	4	4	4	3	3	4	2021-05-12	2021-05-12
O43143	O43143	18	18	18	Pre-mRNA-splicing factor ATP-dependent RNA helicase DHX15	DHX15		1	18	18	18	14	17	13	15	15	13	14	15	14	17	16	17	14	17	13	15	15	13	14	15	14	17	16	17	14	17	13	15	15	13	14	15	14	17	16	17	2021-08-28	2021-08-28
O43169	O43169	2	2	2	Cytochrome b5 type B	CYB5B		1	2	2	2	2	2	1	2	2	2	1	1	2	2	1	2	2	2	1	2	2	2	1	1	2	2	1	2	2	2	1	2	2	2	1	1	2	2	1	2	32.2	32.2
O43172	O43172	6	6	6	U4/U6 small nuclear ribonucleoprotein Prp4	PRPF4		1	6	6	6	5	6	5	6	5	6	2	4	4	6	5	3	5	6	5	6	5	6	2	4	4	6	5	3	5	6	5	6	5	6	2	4	4	6	5	3	2021-01-15	2021-01-15
O43175	O43175	15	15	15	D-3-phosphoglycerate dehydrogenase	PHGDH		1	15	15	15	12	13	15	15	15	15	10	15	13	15	15	15	12	13	15	15	15	15	10	15	13	15	15	15	12	13	15	15	15	15	10	15	13	15	15	15	34.5	34.5
O43237	O43237	4	4	4	Cytoplasmic dynein 1 light intermediate chain 2	DYNC1LI2		1	4	4	4	0	3	2	4	4	3	0	3	2	4	3	3	0	3	2	4	4	3	0	3	2	4	3	3	0	3	2	4	4	3	0	3	2	4	3	3	13	13
O43242	O43242	15	15	15	26S proteasome non-ATPase regulatory subunit 3	PSMD3		1	15	15	15	13	13	11	13	13	14	13	12	11	13	13	14	13	13	11	13	13	14	13	12	11	13	13	14	13	13	11	13	13	14	13	12	11	13	13	14	32	32
O43252	O43252	3	3	3	Bifunctional 3-phosphoadenosine 5-phosphosulfate synthase 1;Sulfate adenylyltransferase;Adenylyl-sulfate kinase	PAPSS1		1	3	3	3	2	2	0	2	2	1	2	3	3	2	2	2	2	2	0	2	2	1	2	3	3	2	2	2	2	2	0	2	2	1	2	3	3	2	2	2	2021-03-08	2021-03-08
O43264	O43264	2	2	2	Centromere/kinetochore protein zw10 homolog	ZW10		1	2	2	2	2	2	2	1	2	2	1	2	2	2	2	2	2	2	2	1	2	2	1	2	2	2	2	2	2	2	2	1	2	2	1	2	2	2	2	2	2021-06-03	2021-06-03
O43290	O43290	4	4	4	U4/U6.U5 tri-snRNP-associated protein 1	SART1		1	4	4	4	3	3	4	4	4	3	1	4	4	4	3	4	3	3	4	4	4	3	1	4	4	4	3	4	3	3	4	4	4	3	1	4	4	4	3	4	2021-04-06	2021-04-06
O43318	O43318	1	1	1	Mitogen-activated protein kinase kinase kinase 7	MAP3K7		1	1	1	1	1	1	1	1	1	1	1	1	1	1	1	1	1	1	1	1	1	1	1	1	1	1	1	1	1	1	1	1	1	1	1	1	1	1	1	1	2021-08-02	2021-08-02
O43324	O43324	1	1	1	Eukaryotic translation elongation factor 1 epsilon-1	EEF1E1		1	1	1	1	1	0	1	1	1	1	1	1	1	1	1	1	1	0	1	1	1	1	1	1	1	1	1	1	1	0	1	1	1	1	1	1	1	1	1	1	2021-03-06	2021-03-06
O43390	O43390	16	10	10	Heterogeneous nuclear ribonucleoprotein R	HNRNPR		1	16	10	10	12	14	14	16	14	16	14	14	13	16	14	13	6	8	8	10	8	10	8	8	7	10	8	7	6	8	8	10	8	10	8	8	7	10	8	7	30	2021-04-22
O43395	O43395	2	2	2	U4/U6 small nuclear ribonucleoprotein Prp3	PRPF3		1	2	2	2	1	2	2	2	1	2	1	2	1	1	1	2	1	2	2	2	1	2	1	2	1	1	1	2	1	2	2	2	1	2	1	2	1	1	1	2	4	4
O43396	O43396	8	8	8	Thioredoxin-like protein 1	TXNL1		1	8	8	8	7	7	6	7	8	8	6	8	8	8	8	7	7	7	6	7	8	8	6	8	8	8	8	7	7	7	6	7	8	8	6	8	8	8	8	7	41.2	41.2
O43399	O43399	6	6	6	Tumor protein D54	TPD52L2		1	6	6	6	4	4	4	5	6	6	4	5	4	5	5	5	4	4	4	5	6	6	4	5	4	5	5	5	4	4	4	5	6	6	4	5	4	5	5	5	49.5	49.5
O43447	O43447	5	5	5	Peptidyl-prolyl cis-trans isomerase H	PPIH		1	5	5	5	4	4	5	5	4	4	4	5	5	5	5	5	4	4	5	5	4	4	4	5	5	5	5	5	4	4	5	5	4	4	4	5	5	5	5	5	26	26
O43488;Q8NHP1	O43488	4;1	4;1	4;1	Aflatoxin B1 aldehyde reductase member 2	AKR7A2		2	4	4	4	4	4	4	4	4	4	2	3	3	4	4	4	4	4	4	4	4	4	2	3	3	4	4	4	4	4	4	4	4	4	2	3	3	4	4	4	2021-09-18	2021-09-18
O43491	O43491	15	15	15	Band 4.1-like protein 2	EPB41L2		1	15	15	15	12	12	12	10	13	15	12	14	13	13	12	13	12	12	12	10	13	15	12	14	13	13	12	13	12	12	12	10	13	15	12	14	13	13	12	13	2021-03-20	2021-03-20
O43493	O43493	3	3	3	Trans-Golgi network integral membrane protein 2	TGOLN2		1	3	3	3	1	2	3	2	2	3	3	2	3	2	2	2	1	2	3	2	2	3	3	2	3	2	2	2	1	2	3	2	2	3	3	2	3	2	2	2	2021-08-09	2021-08-09
O43504	O43504	2	2	2	Ragulator complex protein LAMTOR5	LAMTOR5		1	2	2	2	2	2	1	2	2	2	1	2	2	2	2	2	2	2	1	2	2	2	1	2	2	2	2	2	2	2	1	2	2	2	1	2	2	2	2	2	59.3	59.3
O43566	O43566	1	1	1	Regulator of G-protein signaling 14	RGS14		1	1	1	1	1	1	1	1	1	1	1	1	1	1	1	1	1	1	1	1	1	1	1	1	1	1	1	1	1	1	1	1	1	1	1	1	1	1	1	1	3	3
O43567	O43567	1	1	1	E3 ubiquitin-protein ligase RNF13	RNF13		1	1	1	1	1	1	1	1	1	1	1	1	0	1	1	0	1	1	1	1	1	1	1	1	0	1	1	0	1	1	1	1	1	1	1	1	0	1	1	0	2021-03-06	2021-03-06
O43583	O43583	1	1	1	Density-regulated protein	DENR		1	1	1	1	1	0	1	1	1	1	1	1	1	1	0	1	1	0	1	1	1	1	1	1	1	1	0	1	1	0	1	1	1	1	1	1	1	1	0	1	2021-06-08	2021-06-08
O43598	O43598	3	3	3	2-deoxynucleoside 5-phosphate N-hydrolase 1	DNPH1		1	3	3	3	2	2	2	2	3	3	2	3	2	3	3	2	2	2	2	2	3	3	2	3	2	3	3	2	2	2	2	2	3	3	2	3	2	3	3	2	2021-07-28	2021-07-28
O43615	O43615	5	5	5	Mitochondrial import inner membrane translocase subunit TIM44	TIMM44		1	5	5	5	2	2	2	3	3	3	3	2	3	2	3	1	2	2	2	3	3	3	3	2	3	2	3	1	2	2	2	3	3	3	3	2	3	2	3	1	2021-02-14	2021-02-14
O43617	O43617	2	2	2	Trafficking protein particle complex subunit 3	TRAPPC3		1	2	2	2	1	1	2	1	1	1	1	1	2	1	2	1	1	1	2	1	1	1	1	1	2	1	2	1	1	1	2	1	1	1	1	1	2	1	2	1	2021-06-10	2021-06-10
O43633	O43633	3	3	3	Charged multivesicular body protein 2a	CHMP2A		1	3	3	3	2	2	2	3	3	2	0	2	1	3	3	2	2	2	2	3	3	2	0	2	1	3	3	2	2	2	2	3	3	2	0	2	1	3	3	2	2021-05-09	2021-05-09
O43660	O43660	2	2	2	Pleiotropic regulator 1	PLRG1		1	2	2	2	0	1	2	1	0	1	0	1	0	1	1	0	0	1	2	1	0	1	0	1	0	1	1	0	0	1	2	1	0	1	0	1	0	1	1	0	2021-09-08	2021-09-08
O43665	O43665	3	3	3	Regulator of G-protein signaling 10	RGS10		1	3	3	3	3	3	3	3	3	3	1	3	3	3	3	2	3	3	3	3	3	3	1	3	3	3	3	2	3	3	3	3	3	3	1	3	3	3	3	2	2021-07-23	2021-07-23
O43670	O43670	2	2	2	BUB3-interacting and GLEBS motif-containing protein ZNF207	ZNF207		1	2	2	2	2	2	2	1	2	2	2	1	2	2	1	2	2	2	2	1	2	2	2	1	2	2	1	2	2	2	2	1	2	2	2	1	2	2	1	2	2021-09-02	2021-09-02
O43674	O43674	2	2	2	NADH dehydrogenase [ubiquinone] 1 beta subcomplex subunit 5, mitochondrial	NDUFB5		1	2	2	2	2	1	2	2	1	2	0	1	2	2	2	1	2	1	2	2	1	2	0	1	2	2	2	1	2	1	2	2	1	2	0	1	2	2	2	1	19	19
O43676	O43676	2	2	2	NADH dehydrogenase [ubiquinone] 1 beta subcomplex subunit 3	NDUFB3		1	2	2	2	1	1	2	1	2	2	2	2	2	2	2	2	1	1	2	1	2	2	2	2	2	2	2	2	1	1	2	1	2	2	2	2	2	2	2	2	2021-02-12	2021-02-12
O43678	O43678	3	3	3	NADH dehydrogenase [ubiquinone] 1 alpha subcomplex subunit 2	NDUFA2		1	3	3	3	3	3	3	2	3	3	3	3	3	3	3	3	3	3	3	2	3	3	3	3	3	3	3	3	3	3	3	2	3	3	3	3	3	3	3	3	2021-02-21	2021-02-21
O43681	O43681	6	6	6	ATPase ASNA1	ASNA1		1	6	6	6	3	4	2	4	5	2	3	6	4	5	3	5	3	4	2	4	5	2	3	6	4	5	3	5	3	4	2	4	5	2	3	6	4	5	3	5	2021-04-26	2021-04-26
O43684	O43684	6	6	6	Mitotic checkpoint protein BUB3	BUB3		1	6	6	6	3	3	5	5	3	5	1	5	4	3	5	5	3	3	5	5	3	5	1	5	4	3	5	5	3	3	5	5	3	5	1	5	4	3	5	5	2021-03-22	2021-03-22
O43707;Q9H254	O43707	53;1	53;1	34;1	Alpha-actinin-4	ACTN4		2	53	53	34	41	45	42	47	40	44	39	46	46	45	51	44	41	45	42	47	40	44	39	46	46	45	51	44	27	28	27	30	26	27	25	29	28	28	33	27	64.2	64.2
O43716	O43716	2	2	2	Glutamyl-tRNA(Gln) amidotransferase subunit C, mitochondrial	GATC		1	2	2	2	2	2	2	2	2	2	2	2	2	2	2	2	2	2	2	2	2	2	2	2	2	2	2	2	2	2	2	2	2	2	2	2	2	2	2	2	2021-07-14	2021-07-14
O43747	O43747	4	4	4	AP-1 complex subunit gamma-1	AP1G1		1	4	4	4	3	4	4	3	2	4	3	3	3	4	3	3	3	4	4	3	2	4	3	3	3	4	3	3	3	4	4	3	2	4	3	3	3	4	3	3	2021-05-07	2021-05-07
O43765	O43765	9	9	9	Small glutamine-rich tetratricopeptide repeat-containing protein alpha	SGTA		1	9	9	9	7	8	7	8	8	8	4	9	7	8	8	8	7	8	7	8	8	8	4	9	7	8	8	8	7	8	7	8	8	8	4	9	7	8	8	8	31.9	31.9
O43768;P56211	O43768	3;1	3;1	3;1	Alpha-endosulfine	ENSA		2	3	3	3	2	2	3	3	3	3	2	3	2	3	3	2	2	2	3	3	3	3	2	3	2	3	3	2	2	2	3	3	3	3	2	3	2	3	3	2	46.3	46.3
O43776	O43776	9	9	9	Asparagine--tRNA ligase, cytoplasmic	NARS		1	9	9	9	6	8	6	9	8	8	7	8	8	7	8	8	6	8	6	9	8	8	7	8	8	7	8	8	6	8	6	9	8	8	7	8	8	7	8	8	2021-09-25	2021-09-25
O43805	O43805	1	1	1	Sjoegren syndrome nuclear autoantigen 1	SSNA1		1	1	1	1	1	1	1	1	1	1	1	1	1	1	1	1	1	1	1	1	1	1	1	1	1	1	1	1	1	1	1	1	1	1	1	1	1	1	1	1	2021-08-11	2021-08-11
O43809	O43809	8	8	8	Cleavage and polyadenylation specificity factor subunit 5	NUDT21		1	8	8	8	7	6	6	8	7	7	6	8	7	6	7	7	7	6	6	8	7	7	6	8	7	6	7	7	7	6	6	8	7	7	6	8	7	6	7	7	33	33
O43815	O43815	3	3	3	Striatin	STRN		1	3	3	3	1	1	3	1	2	2	1	2	2	1	3	2	1	1	3	1	2	2	1	2	2	1	3	2	1	1	3	1	2	2	1	2	2	1	3	2	2021-09-05	2021-09-05
O43837	O43837	7	7	7	Isocitrate dehydrogenase [NAD] subunit beta, mitochondrial	IDH3B		1	7	7	7	6	6	4	6	7	6	4	6	6	5	6	5	6	6	4	6	7	6	4	6	6	5	6	5	6	6	4	6	7	6	4	6	6	5	6	5	2021-05-27	2021-05-27
O43847	O43847	4	4	4	Nardilysin	NRD1		1	4	4	4	4	3	4	3	4	4	3	3	3	3	4	4	4	3	4	3	4	4	3	3	3	3	4	4	4	3	4	3	4	4	3	3	3	3	4	4	5	5
O43852	O43852	5	5	5	Calumenin	CALU		1	5	5	5	4	4	4	5	4	5	4	4	4	3	5	3	4	4	4	5	4	5	4	4	4	3	5	3	4	4	4	5	4	5	4	4	4	3	5	3	2021-04-25	2021-04-25
O43914	O43914	2	2	2	TYRO protein tyrosine kinase-binding protein	TYROBP		1	2	2	2	2	2	2	2	2	2	2	2	2	2	2	2	2	2	2	2	2	2	2	2	2	2	2	2	2	2	2	2	2	2	2	2	2	2	2	2	2021-05-26	2021-05-26
O43920	O43920	1	1	1	NADH dehydrogenase [ubiquinone] iron-sulfur protein 5	NDUFS5		1	1	1	1	1	1	0	0	1	1	1	0	1	0	1	1	1	1	0	0	1	1	1	0	1	0	1	1	1	1	0	0	1	1	1	0	1	0	1	1	2021-03-11	2021-03-11
O60216	O60216	3	3	3	Double-strand-break repair protein rad21 homolog	RAD21		1	3	3	3	2	2	1	2	1	2	1	2	0	2	1	1	2	2	1	2	1	2	1	2	0	2	1	1	2	2	1	2	1	2	1	2	0	2	1	1	2021-09-08	2021-09-08
O60220	O60220	4	4	4	Mitochondrial import inner membrane translocase subunit Tim8 A	TIMM8A		1	4	4	4	2	3	3	3	3	4	2	2	3	3	4	4	2	3	3	3	3	4	2	2	3	3	4	4	2	3	3	3	3	4	2	2	3	3	4	4	58.8	58.8
O60234	O60234	10	10	7	Glia maturation factor gamma	GMFG		1	10	10	7	10	8	10	9	8	10	8	10	9	9	9	9	10	8	10	9	8	10	8	10	9	9	9	9	7	6	7	6	6	7	6	7	6	6	6	6	81.7	81.7
O60256	O60256	2	2	1	Phosphoribosyl pyrophosphate synthase-associated protein 2	PRPSAP2		1	2	2	1	2	1	0	0	0	2	0	1	1	0	1	2	2	1	0	0	0	2	0	1	1	0	1	2	1	1	0	0	0	1	0	1	1	0	1	1	2021-04-08	2021-04-08
O60264	O60264	7	7	7	SWI/SNF-related matrix-associated actin-dependent regulator of chromatin subfamily A member 5	SMARCA5		1	7	7	7	3	4	5	5	5	6	4	3	5	6	5	4	3	4	5	5	5	6	4	3	5	6	5	4	3	4	5	5	5	6	4	3	5	6	5	4	8	8
O60271;Q9UPT6	O60271	6;1	6;1	6;1	C-Jun-amino-terminal kinase-interacting protein 4	SPAG9		2	6	6	6	3	2	4	6	6	4	3	6	4	4	4	6	3	2	4	6	6	4	3	6	4	4	4	6	3	2	4	6	6	4	3	6	4	4	4	6	2021-01-07	2021-01-07
O60306	O60306	1	1	1	Intron-binding protein aquarius	AQR		1	1	1	1	1	1	1	1	1	1	1	1	1	1	1	1	1	1	1	1	1	1	1	1	1	1	1	1	1	1	1	1	1	1	1	1	1	1	1	1	0.9	0.9
O60313	O60313	11	11	11	Dynamin-like 120 kDa protein, mitochondrial;Dynamin-like 120 kDa protein, form S1	OPA1		1	11	11	11	7	10	11	10	11	9	5	10	11	11	11	10	7	10	11	10	11	9	5	10	11	11	11	10	7	10	11	10	11	9	5	10	11	11	11	10	2021-03-15	2021-03-15
O60341	O60341	1	1	1	Lysine-specific histone demethylase 1A	KDM1A		1	1	1	1	1	1	1	1	1	1	1	1	1	1	1	1	1	1	1	1	1	1	1	1	1	1	1	1	1	1	1	1	1	1	1	1	1	1	1	1	2021-08-01	2021-08-01
O60476	O60476	1	1	1	Mannosyl-oligosaccharide 1,2-alpha-mannosidase IB	MAN1A2		1	1	1	1	1	1	1	1	1	1	1	1	1	1	1	1	1	1	1	1	1	1	1	1	1	1	1	1	1	1	1	1	1	1	1	1	1	1	1	1	2021-07-02	2021-07-02
O60488	O60488	16	16	15	Long-chain-fatty-acid--CoA ligase 4	ACSL4		1	16	16	15	12	13	9	14	12	14	14	14	14	12	14	10	12	13	9	14	12	14	14	14	14	12	14	10	11	12	8	13	11	13	13	13	13	11	13	9	32.6	32.6
O60493	O60493	5	5	5	Sorting nexin-3	SNX3		1	5	5	5	4	5	5	5	4	5	4	5	5	5	5	5	4	5	5	5	4	5	4	5	5	5	5	5	4	5	5	5	4	5	4	5	5	5	5	5	2021-09-25	2021-09-25
O60496	O60496	4	4	4	Docking protein 2	DOK2		1	4	4	4	3	3	3	4	2	2	1	2	2	3	3	2	3	3	3	4	2	2	1	2	2	3	3	2	3	3	3	4	2	2	1	2	2	3	3	2	2021-03-13	2021-03-13
O60502	O60502	3	3	3	Protein O-GlcNAcase	MGEA5		1	3	3	3	1	1	2	3	3	2	0	2	3	2	2	3	1	1	2	3	3	2	0	2	3	2	2	3	1	1	2	3	3	2	0	2	3	2	2	3	2021-09-05	2021-09-05
O60506	O60506	17	17	11	Heterogeneous nuclear ribonucleoprotein Q	SYNCRIP		1	17	17	11	14	17	13	14	14	15	13	15	14	16	16	16	14	17	13	14	14	15	13	15	14	16	16	16	8	11	7	8	8	9	7	9	8	10	10	10	33.9	33.9
O60508	O60508	1	1	1	Pre-mRNA-processing factor 17	CDC40		1	1	1	1	1	1	1	1	1	1	1	1	1	1	1	1	1	1	1	1	1	1	1	1	1	1	1	1	1	1	1	1	1	1	1	1	1	1	1	1	2021-04-02	2021-04-02
O60568	O60568	18	18	18	Procollagen-lysine,2-oxoglutarate 5-dioxygenase 3	PLOD3		1	18	18	18	16	15	14	14	15	16	12	13	13	14	12	11	16	15	14	14	15	16	12	13	13	14	12	11	16	15	14	14	15	16	12	13	13	14	12	11	32.1	32.1
O60603	O60603	2	2	2	Toll-like receptor 2	TLR2		1	2	2	2	2	2	1	2	2	2	2	2	2	2	1	2	2	2	1	2	2	2	2	2	2	2	1	2	2	2	1	2	2	2	2	2	2	2	1	2	2021-08-04	2021-08-04
O60610	O60610	26	26	26	Protein diaphanous homolog 1	DIAPH1		1	26	26	26	17	20	13	20	22	18	16	20	20	19	23	19	17	20	13	20	22	18	16	20	20	19	23	19	17	20	13	20	22	18	16	20	20	19	23	19	2021-09-25	2021-09-25
O60613	O60613	5	5	5	15 kDa selenoprotein	2015-09-01		1	5	5	5	5	5	4	5	4	5	5	5	5	4	5	5	5	5	4	5	4	5	5	5	5	4	5	5	5	5	4	5	4	5	5	5	5	4	5	5	2021-09-27	2021-09-27
O60664	O60664	18	18	18	Perilipin-3	PLIN3		1	18	18	18	17	17	13	16	17	16	13	17	16	17	15	15	17	17	13	16	17	16	13	17	16	17	15	15	17	17	13	16	17	16	13	17	16	17	15	15	58.8	58.8
O60684;O15131;P52294	O60684;O15131;P52294	2;1;1	2;1;1	2;1;1	Importin subunit alpha-7;Importin subunit alpha-6;Importin subunit alpha-5;Importin subunit alpha-5, N-terminally processed	KPNA6;KPNA5;KPNA1	;;	3	2	2	2	2	2	0	1	2	2	1	1	1	2	2	2	2	2	0	1	2	2	1	1	1	2	2	2	2	2	0	1	2	2	1	1	1	2	2	2	2021-06-08	2021-06-08
O60701	O60701	4	4	4	UDP-glucose 6-dehydrogenase	UGDH		1	4	4	4	2	2	3	3	3	3	2	3	3	3	2	1	2	2	3	3	3	3	2	3	3	3	2	1	2	2	3	3	3	3	2	3	3	3	2	1	2021-03-12	2021-03-12
O60711	O60711	3	3	3	Leupaxin	LPXN		1	3	3	3	2	3	2	2	3	2	2	3	3	2	3	2	2	3	2	2	3	2	2	3	3	2	3	2	2	3	2	2	3	2	2	3	3	2	3	2	2021-03-15	2021-03-15
O60716	O60716	4	4	4	Catenin delta-1	CTNND1		1	4	4	4	2	3	3	3	4	3	2	2	4	1	3	2	2	3	3	3	4	3	2	2	4	1	3	2	2	3	3	3	4	3	2	2	4	1	3	2	2021-09-05	2021-09-05
O60749	O60749	9	9	9	Sorting nexin-2	SNX2		1	9	9	9	5	8	8	8	7	7	7	8	7	8	8	8	5	8	8	8	7	7	7	8	7	8	8	8	5	8	8	8	7	7	7	8	7	8	8	8	2021-04-20	2021-04-20
O60762	O60762	3	3	3	Dolichol-phosphate mannosyltransferase subunit 1	DPM1		1	3	3	3	3	2	1	2	3	3	3	3	2	2	1	2	3	2	1	2	3	3	3	3	2	2	1	2	3	2	1	2	3	3	3	3	2	2	1	2	2021-05-13	2021-05-13
O60763	O60763	16	16	16	General vesicular transport factor p115	USO1		1	16	16	16	14	15	14	15	15	15	13	14	15	15	15	15	14	15	14	15	15	15	13	14	15	15	15	15	14	15	14	15	15	15	13	14	15	15	15	15	2021-09-28	2021-09-28
O60783	O60783	1	1	1	28S ribosomal protein S14, mitochondrial	MRPS14		1	1	1	1	1	1	1	1	1	1	0	1	1	1	1	1	1	1	1	1	1	1	0	1	1	1	1	1	1	1	1	1	1	1	0	1	1	1	1	1	2021-07-11	2021-07-11
O60784	O60784	9	9	9	Target of Myb protein 1	TOM1		1	9	9	9	9	8	6	9	7	9	6	9	9	8	9	8	9	8	6	9	7	9	6	9	9	8	9	8	9	8	6	9	7	9	6	9	9	8	9	8	2021-07-28	2021-07-28
Q99879;Q99877;Q93079;Q5QNW6;P62807;P58876;P57053;O60814;Q99880;Q96A08	Q99879;Q99877;Q93079;Q5QNW6;P62807;P58876;P57053;O60814;Q99880	11;11;11;11;11;11;11;11;10;4	11;11;11;11;11;11;11;11;10;4	4;4;4;4;4;4;4;4;4;0	Histone H2B type 1-M;Histone H2B type 1-N;Histone H2B type 1-H;Histone H2B type 2-F;Histone H2B type 1-C/E/F/G/I;Histone H2B type 1-D;Histone H2B type F-S;Histone H2B type 1-K;Histone H2B type 1-L	HIST1H2BM;HIST1H2BN;HIST1H2BH;HIST2H2BF;HIST1H2BC;HIST1H2BD;H2BFS;HIST1H2BK;HIST1H2BL	;;;;;;;;	10	11	11	4	10	11	9	11	11	11	10	11	10	10	11	11	10	11	9	11	11	11	10	11	10	10	11	11	4	4	3	4	4	4	4	4	3	4	4	4	55.6	55.6
O60826	O60826	7	7	7	Coiled-coil domain-containing protein 22	CCDC22		1	7	7	7	3	5	4	6	6	7	4	7	4	6	6	6	3	5	4	6	6	7	4	7	4	6	6	6	3	5	4	6	6	7	4	7	4	6	6	6	2021-08-18	2021-08-18
O60832	O60832	11	11	11	H/ACA ribonucleoprotein complex subunit 4	DKC1		1	11	11	11	8	8	7	8	7	9	7	7	8	10	8	8	8	8	7	8	7	9	7	7	8	10	8	8	8	8	7	8	7	9	7	7	8	10	8	8	2021-01-25	2021-01-25
O60841	O60841	4	4	4	Eukaryotic translation initiation factor 5B	EIF5B		1	4	4	4	4	4	4	4	4	3	4	4	4	4	4	4	4	4	4	4	4	3	4	4	4	4	4	4	4	4	4	4	4	3	4	4	4	4	4	4	2021-02-07	2021-02-07
O60869	O60869	4	4	4	Endothelial differentiation-related factor 1	EDF1		1	4	4	4	1	4	4	4	4	4	3	3	4	4	4	4	1	4	4	4	4	4	3	3	4	4	4	4	1	4	4	4	4	4	3	3	4	4	4	4	2021-07-25	2021-07-25
O60879	O60879	4	4	4	Protein diaphanous homolog 2	DIAPH2		1	4	4	4	4	4	3	4	3	4	3	3	4	3	4	3	4	4	3	4	3	4	3	3	4	3	4	3	4	4	3	4	3	4	3	3	4	3	4	3	2021-07-04	2021-07-04
O60884	O60884	3	3	3	DnaJ homolog subfamily A member 2	DNAJA2		1	3	3	3	3	3	2	2	3	3	3	3	3	3	3	3	3	3	2	2	3	3	3	3	3	3	3	3	3	3	2	2	3	3	3	3	3	3	3	3	2021-09-12	2021-09-12
O60925	O60925	2	2	2	Prefoldin subunit 1	PFDN1		1	2	2	2	2	2	1	2	2	2	1	2	1	2	2	2	2	2	1	2	2	2	1	2	1	2	2	2	2	2	1	2	2	2	1	2	1	2	2	2	2021-07-28	2021-07-28
O75044;Q7Z6B7;P0DMP2;P0DJJ0	O75044;Q7Z6B7	3;2;1;1	3;2;1;1	3;2;1;1	SLIT-ROBO Rho GTPase-activating protein 2;SLIT-ROBO Rho GTPase-activating protein 1	SRGAP2;SRGAP1	;	4	3	3	3	1	0	1	1	1	1	1	2	0	2	1	2	1	0	1	1	1	1	1	2	0	2	1	2	1	0	1	1	1	1	1	2	0	2	1	2	2021-01-03	2021-01-03
O75064	O75064	2	2	2	DENN domain-containing protein 4B	DENND4B		1	2	2	2	2	1	2	1	2	2	1	2	2	1	1	1	2	1	2	1	2	2	1	2	2	1	1	1	2	1	2	1	2	2	1	2	2	1	1	1	2021-04-02	2021-04-02
O75083	O75083	35	35	35	WD repeat-containing protein 1	WDR1		1	35	35	35	28	30	34	32	30	33	31	33	34	33	34	34	28	30	34	32	30	33	31	33	34	33	34	34	28	30	34	32	30	33	31	33	34	33	34	34	70.1	70.1
O75122;Q7Z460	O75122;Q7Z460	2;2	2;2	2;2	CLIP-associating protein 2;CLIP-associating protein 1	CLASP2;CLASP1	;	2	2	2	2	0	1	2	1	1	1	1	1	1	1	1	1	0	1	2	1	1	1	1	1	1	1	1	1	0	1	2	1	1	1	1	1	1	1	1	1	2021-03-02	2021-03-02
O75131;Q8IYJ1;Q96A23;O95741;Q86YQ8;Q9HCH3;Q9UBL6	O75131	7;1;1;1;1;1;1	7;1;1;1;1;1;1	6;0;0;0;0;0;0	Copine-3	CPNE3		7	7	7	6	5	7	5	6	7	5	6	6	7	7	6	6	5	7	5	6	7	5	6	6	7	7	6	6	4	6	4	5	6	4	5	5	6	6	5	5	2021-02-18	2021-02-18
O75150	O75150	4	4	4	E3 ubiquitin-protein ligase BRE1B	RNF40		1	4	4	4	3	3	3	3	4	4	3	4	2	2	4	4	3	3	3	3	4	4	3	4	2	2	4	4	3	3	3	3	4	4	3	4	2	2	4	4	2021-01-06	2021-01-06
O75152;A0A1B0GTU1	O75152	3;1	3;1	3;1	Zinc finger CCCH domain-containing protein 11A	ZC3H11A		2	3	3	3	1	2	3	2	2	3	0	2	2	2	2	2	1	2	3	2	2	3	0	2	2	2	2	2	1	2	3	2	2	3	0	2	2	2	2	2	2021-08-06	2021-08-06
O75165	O75165	8	8	8	DnaJ homolog subfamily C member 13	DNAJC13		1	8	8	8	7	5	6	6	6	6	4	7	7	6	5	6	7	5	6	6	6	6	4	7	7	6	5	6	7	5	6	6	6	6	4	7	7	6	5	6	2021-05-05	2021-05-05
O75170	O75170	4	4	4	Serine/threonine-protein phosphatase 6 regulatory subunit 2	PPP6R2		1	4	4	4	2	3	3	2	3	3	4	4	4	3	4	3	2	3	3	2	3	3	4	4	4	3	4	3	2	3	3	2	3	3	4	4	4	3	4	3	2021-02-05	2021-02-05
Q8IWZ3;O75179	Q8IWZ3;O75179	2;2	2;2	2;2	Ankyrin repeat and KH domain-containing protein 1;Ankyrin repeat domain-containing protein 17	ANKHD1;ANKRD17	;	2	2	2	2	0	0	2	1	1	2	1	2	1	0	1	2	0	0	2	1	1	2	1	2	1	0	1	2	0	0	2	1	1	2	1	2	1	0	1	2	2021-05-01	2021-05-01
O75208	O75208	2	2	2	Ubiquinone biosynthesis protein COQ9, mitochondrial	COQ9		1	2	2	2	2	1	1	1	1	1	0	1	1	1	1	2	2	1	1	1	1	1	0	1	1	1	1	2	2	1	1	1	1	1	0	1	1	1	1	2	2021-03-12	2021-03-12
O75223	O75223	2	2	2	Gamma-glutamylcyclotransferase	GGCT		1	2	2	2	1	1	1	1	2	2	1	0	0	1	2	2	1	1	1	1	2	2	1	0	0	1	2	2	1	1	1	1	2	2	1	0	0	1	2	2	2021-06-10	2021-06-10
O75251	O75251	1	1	1	NADH dehydrogenase [ubiquinone] iron-sulfur protein 7, mitochondrial	NDUFS7		1	1	1	1	1	1	1	1	1	0	1	1	0	1	0	0	1	1	1	1	1	0	1	1	0	1	0	0	1	1	1	1	1	0	1	1	0	1	0	0	2021-06-06	2021-06-06
O75306	O75306	6	6	6	NADH dehydrogenase [ubiquinone] iron-sulfur protein 2, mitochondrial	NDUFS2		1	6	6	6	5	4	4	4	3	5	3	4	3	6	6	3	5	4	4	4	3	5	3	4	3	6	6	3	5	4	4	4	3	5	3	4	3	6	6	3	2021-06-18	2021-06-18
O75312	O75312	4	4	4	Zinc finger protein ZPR1	ZPR1		1	4	4	4	3	4	4	4	2	4	2	3	4	3	2	4	3	4	4	4	2	4	2	3	4	3	2	4	3	4	4	4	2	4	2	3	4	3	2	4	2021-08-07	2021-08-07
O75323	O75323	7	7	7	Protein NipSnap homolog 2	GBAS		1	7	7	7	6	4	4	5	6	6	3	7	5	7	6	2	6	4	4	5	6	6	3	7	5	7	6	2	6	4	4	5	6	6	3	7	5	7	6	2	32.5	32.5
O75340	O75340	2	2	2	Programmed cell death protein 6	PDCD6		1	2	2	2	1	2	2	1	2	1	2	2	2	1	1	2	1	2	2	1	2	1	2	2	2	1	1	2	1	2	2	1	2	1	2	2	2	1	1	2	23	23
O75347	O75347	7	7	7	Tubulin-specific chaperone A	TBCA		1	7	7	7	6	6	6	6	5	6	6	7	6	7	6	6	6	6	6	6	5	6	6	7	6	7	6	6	6	6	6	6	5	6	6	7	6	7	6	6	56.5	56.5
O75348;O95670	O75348	7;2	7;2	7;2	V-type proton ATPase subunit G 1	ATP6V1G1		2	7	7	7	7	4	6	6	7	5	6	6	6	7	4	5	7	4	6	6	7	5	6	6	6	7	4	5	7	4	6	6	7	5	6	6	6	7	4	5	68.6	68.6
O75351	O75351	6	6	6	Vacuolar protein sorting-associated protein 4B	VPS4B		1	6	6	6	4	4	4	5	5	4	4	4	5	4	6	4	4	4	4	5	5	4	4	4	5	4	6	4	4	4	4	5	5	4	4	4	5	4	6	4	2021-04-19	2021-04-19
O75352	O75352	2	2	2	Mannose-P-dolichol utilization defect 1 protein	MPDU1		1	2	2	2	1	2	2	1	2	2	1	2	1	2	2	1	1	2	2	1	2	2	1	2	1	2	2	1	1	2	2	1	2	2	1	2	1	2	2	1	2021-01-08	2021-01-08
O75367;Q9P0M6	O75367	18;2	18;2	18;2	Core histone macro-H2A.1	H2AFY		2	18	18	18	18	18	16	17	17	17	16	16	17	17	18	18	18	18	16	17	17	17	16	16	17	17	18	18	18	18	16	17	17	17	16	16	17	17	18	18	53	53
O75368	O75368	8	8	8	SH3 domain-binding glutamic acid-rich-like protein	SH3BGRL		1	8	8	8	4	6	7	5	6	8	5	6	7	6	7	6	4	6	7	5	6	8	5	6	7	6	7	6	4	6	7	5	6	8	5	6	7	6	7	6	68.4	68.4
O75369;Q14315;P21333	O75369	14;3;2	14;3;2	14;3;2	Filamin-B	FLNB		3	14	14	14	5	8	11	10	11	12	4	8	8	12	10	8	5	8	11	10	11	12	4	8	8	12	10	8	5	8	11	10	11	12	4	8	8	12	10	8	2021-08-06	2021-08-06
O75376	O75376	2	2	2	Nuclear receptor corepressor 1	NCOR1		1	2	2	2	1	2	2	1	2	2	1	1	1	2	2	2	1	2	2	1	2	2	1	1	1	2	2	2	1	2	2	1	2	2	1	1	1	2	2	2	2021-01-01	2021-01-01
O75380	O75380	5	5	5	NADH dehydrogenase [ubiquinone] iron-sulfur protein 6, mitochondrial	NDUFS6		1	5	5	5	3	3	2	4	3	3	2	4	3	4	3	4	3	3	2	4	3	3	2	4	3	4	3	4	3	3	2	4	3	3	2	4	3	4	3	4	61.3	61.3
O75381	O75381	2	2	2	Peroxisomal membrane protein PEX14	PEX14		1	2	2	2	0	1	1	1	2	2	0	1	1	2	1	1	0	1	1	1	2	2	0	1	1	2	1	1	0	1	1	1	2	2	0	1	1	2	1	1	2021-08-09	2021-08-09
O75390	O75390	13	13	13	Citrate synthase, mitochondrial	CS		1	13	13	13	12	13	10	11	12	11	10	13	12	11	12	11	12	13	10	11	12	11	10	13	12	11	12	11	12	13	10	11	12	11	10	13	12	11	12	11	2021-05-31	2021-05-31
O75396	O75396	13	13	13	Vesicle-trafficking protein SEC22b	SEC22B		1	13	13	13	9	11	10	11	12	10	11	11	9	10	10	9	9	11	10	11	12	10	11	11	9	10	10	9	9	11	10	11	12	10	11	11	9	10	10	9	52.1	52.1
O75400	O75400	3	3	3	Pre-mRNA-processing factor 40 homolog A	PRPF40A		1	3	3	3	2	1	3	1	2	2	2	3	1	1	1	3	2	1	3	1	2	2	2	3	1	1	1	3	2	1	3	1	2	2	2	3	1	1	1	3	2021-07-03	2021-07-03
O75410	O75410	3	3	3	Transforming acidic coiled-coil-containing protein 1	TACC1		1	3	3	3	2	2	2	3	3	2	1	3	2	2	2	2	2	2	2	3	3	2	1	3	2	2	2	2	2	2	2	3	3	2	1	3	2	2	2	2	2021-01-06	2021-01-06
O75427	O75427	8	8	8	Leucine-rich repeat and calponin homology domain-containing protein 4	LRCH4		1	8	8	8	5	5	5	6	7	6	5	6	5	6	5	5	5	5	5	6	7	6	5	6	5	6	5	5	5	5	5	6	7	6	5	6	5	6	5	5	2021-02-19	2021-02-19
O75436	O75436	2	2	2	Vacuolar protein sorting-associated protein 26A	VPS26A		1	2	2	2	2	2	2	2	2	2	2	2	2	2	2	2	2	2	2	2	2	2	2	2	2	2	2	2	2	2	2	2	2	2	2	2	2	2	2	2	8	8
O75438	O75438	1	1	1	NADH dehydrogenase [ubiquinone] 1 beta subcomplex subunit 1	NDUFB1		1	1	1	1	1	1	1	1	1	1	1	1	1	1	1	1	1	1	1	1	1	1	1	1	1	1	1	1	1	1	1	1	1	1	1	1	1	1	1	1	19	19
O75439	O75439	11	10	10	Mitochondrial-processing peptidase subunit beta	PMPCB		1	11	10	10	10	11	9	9	10	9	9	11	9	8	9	8	9	10	8	8	9	8	8	10	8	7	8	7	9	10	8	8	9	8	8	10	8	7	8	7	2021-07-30	29.2
O75477	O75477	4	1	1	Erlin-1	ERLIN1		1	4	1	1	4	4	4	4	4	4	3	4	4	4	3	4	1	1	1	1	1	1	0	1	1	1	1	1	1	1	1	1	1	1	0	1	1	1	1	1	2021-05-16	2021-01-06
O75489	O75489	8	8	8	NADH dehydrogenase [ubiquinone] iron-sulfur protein 3, mitochondrial	NDUFS3		1	8	8	8	5	4	8	6	6	7	5	8	4	4	5	5	5	4	8	6	6	7	5	8	4	4	5	5	5	4	8	6	6	7	5	8	4	4	5	5	2021-07-30	2021-07-30
O75494;Q8WXF0	O75494	3;1	3;1	3;1	Serine/arginine-rich splicing factor 10	SRSF10		2	3	3	3	2	2	1	2	3	1	2	2	3	3	2	3	2	2	1	2	3	1	2	2	3	3	2	3	2	2	1	2	3	1	2	2	3	3	2	3	2021-09-14	2021-09-14
O75531	O75531	7	7	7	Barrier-to-autointegration factor;Barrier-to-autointegration factor, N-terminally processed	BANF1		1	7	7	7	7	6	5	7	6	6	7	6	7	6	7	6	7	6	5	7	6	6	7	6	7	6	7	6	7	6	5	7	6	6	7	6	7	6	7	6	57.3	57.3
O75533	O75533	20	20	20	Splicing factor 3B subunit 1	SF3B1		1	20	20	20	13	16	16	17	18	17	10	16	15	16	18	15	13	16	16	17	18	17	10	16	15	16	18	15	13	16	16	17	18	17	10	16	15	16	18	15	2021-04-23	2021-04-23
O75534	O75534	4	4	4	Cold shock domain-containing protein E1	CSDE1		1	4	4	4	3	2	3	4	4	3	2	3	4	3	4	3	3	2	3	4	4	3	2	3	4	3	4	3	3	2	3	4	4	3	2	3	4	3	4	3	2021-06-05	2021-06-05
O75569	O75569	2	2	2	Interferon-inducible double-stranded RNA-dependent protein kinase activator A	PRKRA		1	2	2	2	1	2	1	1	1	1	0	1	1	2	2	1	1	2	1	1	1	1	0	1	1	2	2	1	1	2	1	1	1	1	0	1	1	2	2	1	2021-09-10	2021-09-10
O75607	O75607	2	2	2	Nucleoplasmin-3	NPM3		1	2	2	2	2	2	2	2	2	2	2	2	2	2	2	2	2	2	2	2	2	2	2	2	2	2	2	2	2	2	2	2	2	2	2	2	2	2	2	2	2021-04-17	2021-04-17
O75608	O75608	10	10	10	Acyl-protein thioesterase 1	LYPLA1		1	10	10	10	9	9	8	9	10	10	9	10	8	9	10	9	9	9	8	9	10	10	9	10	8	9	10	9	9	9	8	9	10	10	9	10	8	9	10	9	66.5	66.5
O75629	O75629	1	1	1	Protein CREG1	CREG1		1	1	1	1	1	1	1	1	1	1	1	1	1	1	1	1	1	1	1	1	1	1	1	1	1	1	1	1	1	1	1	1	1	1	1	1	1	1	1	1	2021-05-09	2021-05-09
O75643	O75643	26	26	26	U5 small nuclear ribonucleoprotein 200 kDa helicase	SNRNP200		1	26	26	26	21	20	17	20	21	22	20	20	20	19	20	22	21	20	17	20	21	22	20	20	20	19	20	22	21	20	17	20	21	22	20	20	20	19	20	22	2021-09-17	2021-09-17
O75663	O75663	4	4	4	TIP41-like protein	TIPRL		1	4	4	4	2	3	2	3	3	2	0	2	3	3	3	3	2	3	2	3	3	2	0	2	3	3	3	3	2	3	2	3	3	2	0	2	3	3	3	3	2021-06-24	2021-06-24
O75688;P35813	O75688;P35813	2;1	2;1	2;1	Protein phosphatase 1B;Protein phosphatase 1A	PPM1B;PPM1A	;	2	2	2	2	2	2	2	2	2	2	2	2	2	2	2	2	2	2	2	2	2	2	2	2	2	2	2	2	2	2	2	2	2	2	2	2	2	2	2	2	2021-02-05	2021-02-05
O75694	O75694	9	9	9	Nuclear pore complex protein Nup155	NUP155		1	9	9	9	5	7	6	5	5	8	5	8	6	7	7	5	5	7	6	5	5	8	5	8	6	7	7	5	5	7	6	5	5	8	5	8	6	7	7	5	2021-01-11	2021-01-11
O75695	O75695	4	4	4	Protein XRP2	RP2		1	4	4	4	4	4	4	4	4	4	3	4	4	4	4	4	4	4	4	4	4	4	3	4	4	4	4	4	4	4	4	4	4	4	3	4	4	4	4	4	2021-06-12	2021-06-12
O75718	O75718	3	3	3	Cartilage-associated protein	CRTAP		1	3	3	3	3	3	3	3	3	3	2	3	3	3	3	3	3	3	3	3	3	3	2	3	3	3	3	3	3	3	3	3	3	3	2	3	3	3	3	3	2021-07-10	2021-07-10
O75746	O75746	6	6	4	Calcium-binding mitochondrial carrier protein Aralar1	SLC25A12		1	6	6	4	4	5	5	5	6	4	4	4	4	5	5	5	4	5	5	5	6	4	4	4	4	5	5	5	2	3	3	3	4	2	2	2	2	3	3	3	2021-02-12	2021-02-12
O75787	O75787	3	3	3	Renin receptor	ATP6AP2		1	3	3	3	2	1	3	2	3	2	1	2	1	1	1	2	2	1	3	2	3	2	1	2	1	1	1	2	2	1	3	2	3	2	1	2	1	1	1	2	2021-01-13	2021-01-13
O75792	O75792	2	2	2	Ribonuclease H2 subunit A	RNASEH2A		1	2	2	2	1	1	1	2	1	2	1	0	1	2	1	2	1	1	1	2	1	2	1	0	1	2	1	2	1	1	1	2	1	2	1	0	1	2	1	2	10	10
O75821	O75821	6	6	6	Eukaryotic translation initiation factor 3 subunit G	EIF3G		1	6	6	6	6	4	3	6	5	5	4	6	6	5	4	5	6	4	3	6	5	5	4	6	6	5	4	5	6	4	3	6	5	5	4	6	6	5	4	5	2021-06-30	2021-06-30
O75822	O75822	3	3	3	Eukaryotic translation initiation factor 3 subunit J	EIF3J		1	3	3	3	2	3	3	3	3	3	2	3	3	3	3	3	2	3	3	3	3	3	2	3	3	3	3	3	2	3	3	3	3	3	2	3	3	3	3	3	2021-08-19	2021-08-19
O75828	O75828	3	1	1	Carbonyl reductase [NADPH] 3	CBR3		1	3	1	1	3	3	3	3	3	3	3	3	3	3	3	3	1	1	1	1	1	1	1	1	1	1	1	1	1	1	1	1	1	1	1	1	1	1	1	1	2021-04-13	2021-09-02
O75832	O75832	1	1	1	26S proteasome non-ATPase regulatory subunit 10	PSMD10		1	1	1	1	1	1	1	1	1	1	1	1	1	1	1	1	1	1	1	1	1	1	1	1	1	1	1	1	1	1	1	1	1	1	1	1	1	1	1	1	2021-06-10	2021-06-10
O75844	O75844	15	15	15	CAAX prenyl protease 1 homolog	ZMPSTE24		1	15	15	15	13	11	13	14	13	13	12	14	14	13	13	13	13	11	13	14	13	13	12	14	14	13	13	13	13	11	13	14	13	13	12	14	14	13	13	13	28	28
O75874	O75874	11	10	10	Isocitrate dehydrogenase [NADP] cytoplasmic	IDH1		1	11	10	10	8	10	11	10	10	11	9	10	10	11	10	9	8	10	10	9	9	10	8	9	9	10	9	9	8	10	10	9	9	10	8	9	9	10	9	9	32.6	2021-04-30
O75886;Q92783	O75886	3;1	3;1	3;1	Signal transducing adapter molecule 2	STAM2		2	3	3	3	1	2	2	3	2	1	1	3	2	2	3	2	1	2	2	3	2	1	1	3	2	2	3	2	1	2	2	3	2	1	1	3	2	2	3	2	2021-03-06	2021-03-06
O75896	O75896	1	1	1	Tumor suppressor candidate 2	TUSC2		1	1	1	1	1	1	1	1	1	1	1	0	1	1	1	1	1	1	1	1	1	1	1	0	1	1	1	1	1	1	1	1	1	1	1	0	1	1	1	1	2021-09-10	2021-09-10
O75907	O75907	1	1	1	Diacylglycerol O-acyltransferase 1	DGAT1		1	1	1	1	0	1	1	1	1	1	1	1	1	1	1	1	0	1	1	1	1	1	1	1	1	1	1	1	0	1	1	1	1	1	1	1	1	1	1	1	2021-09-03	2021-09-03
O75915	O75915	4	4	4	PRA1 family protein 3	ARL6IP5		1	4	4	4	3	4	4	4	4	3	2	4	3	4	4	3	3	4	4	4	4	3	2	4	3	4	4	3	3	4	4	4	4	3	2	4	3	4	4	3	2021-03-21	2021-03-21
O75923	O75923	7	6	6	Dysferlin	DYSF		1	7	6	6	5	5	3	4	5	5	1	2	3	7	7	5	4	4	3	3	4	4	1	2	3	6	6	5	4	4	3	3	4	4	1	2	3	6	6	5	2021-02-06	2021-05-05
O75934	O75934	3	3	3	Pre-mRNA-splicing factor SPF27	BCAS2		1	3	3	3	3	3	2	3	3	3	2	3	3	3	3	2	3	3	2	3	3	3	2	3	3	3	3	2	3	3	2	3	3	3	2	3	3	3	3	2	2021-08-21	2021-08-21
O75935	O75935	2	2	2	Dynactin subunit 3	DCTN3		1	2	2	2	1	1	1	1	1	2	1	2	1	1	2	2	1	1	1	1	1	2	1	2	1	1	2	2	1	1	1	1	1	2	1	2	1	1	2	2	2021-01-15	2021-01-15
O75937	O75937	3	3	3	DnaJ homolog subfamily C member 8	DNAJC8		1	3	3	3	2	2	3	3	2	2	1	2	2	2	2	2	2	2	3	3	2	2	1	2	2	2	2	2	2	2	3	3	2	2	1	2	2	2	2	2	17	17
O75947	O75947	13	13	13	ATP synthase subunit d, mitochondrial	ATP5H		1	13	13	13	9	12	10	13	13	13	11	12	12	11	13	12	9	12	10	13	13	13	11	12	12	11	13	12	9	12	10	13	13	13	11	12	12	11	13	12	80.1	80.1
O75955	O75955	4	4	4	Flotillin-1	FLOT1		1	4	4	4	2	3	3	2	3	2	3	2	3	3	2	1	2	3	3	2	3	2	3	2	3	3	2	1	2	3	3	2	3	2	3	2	3	3	2	1	2021-01-10	2021-01-10
O75964	O75964	6	6	6	ATP synthase subunit g, mitochondrial	ATP5L		1	6	6	6	2	4	4	4	5	5	5	4	4	3	5	2	2	4	4	4	5	5	5	4	4	3	5	2	2	4	4	4	5	5	5	4	4	3	5	2	58.3	58.3
O75976	O75976	1	1	1	Carboxypeptidase D	CPD		1	1	1	1	0	1	1	1	1	0	0	0	0	0	1	0	0	1	1	1	1	0	0	0	0	0	1	0	0	1	1	1	1	0	0	0	0	0	1	0	2021-05-02	2021-05-02
O75995	O75995	2	2	2	SAM and SH3 domain-containing protein 3	SASH3		1	2	2	2	1	2	2	2	2	1	2	2	2	2	2	2	1	2	2	2	2	1	2	2	2	2	2	2	1	2	2	2	2	1	2	2	2	2	2	2	2021-07-13	2021-07-13
O76003	O76003	1	1	1	Glutaredoxin-3	GLRX3		1	1	1	1	1	1	0	1	1	1	1	1	1	1	1	1	1	1	0	1	1	1	1	1	1	1	1	1	1	1	0	1	1	1	1	1	1	1	1	1	2021-06-06	2021-06-06
O76021	O76021	7	7	7	Ribosomal L1 domain-containing protein 1	RSL1D1		1	7	7	7	7	6	5	5	7	6	4	6	7	6	5	6	7	6	5	5	7	6	4	6	7	6	5	6	7	6	5	5	7	6	4	6	7	6	5	6	2021-07-22	2021-07-22
O76031	O76031	7	7	7	ATP-dependent Clp protease ATP-binding subunit clpX-like, mitochondrial	CLPX		1	7	7	7	5	5	4	5	5	7	3	6	5	4	7	6	5	5	4	5	5	7	3	6	5	4	7	6	5	5	4	5	5	7	3	6	5	4	7	6	2021-05-14	2021-05-14
O76094	O76094	9	9	9	Signal recognition particle subunit SRP72	SRP72		1	9	9	9	6	8	5	6	7	6	4	6	7	6	5	4	6	8	5	6	7	6	4	6	7	6	5	4	6	8	5	6	7	6	4	6	7	6	5	4	2021-05-19	2021-05-19
O94766	O94766	3	3	3	Galactosylgalactosylxylosylprotein 3-beta-glucuronosyltransferase 3	B3GAT3		1	3	3	3	3	3	3	3	3	3	3	3	3	3	3	3	3	3	3	3	3	3	3	3	3	3	3	3	3	3	3	3	3	3	3	3	3	3	3	3	2021-09-14	2021-09-14
O94768	O94768	1	1	1	Serine/threonine-protein kinase 17B	STK17B		1	1	1	1	1	1	1	1	1	1	1	1	1	1	1	1	1	1	1	1	1	1	1	1	1	1	1	1	1	1	1	1	1	1	1	1	1	1	1	1	2021-08-03	2021-08-03
O94776	O94776	6	6	6	Metastasis-associated protein MTA2	MTA2		1	6	6	6	3	4	4	4	4	6	1	3	2	3	5	5	3	4	4	4	4	6	1	3	2	3	5	5	3	4	4	4	4	6	1	3	2	3	5	5	2021-06-13	2021-06-13
O94804;Q9H2G2	O94804	18;1	18;1	18;1	Serine/threonine-protein kinase 10	STK10		2	18	18	18	14	16	15	16	14	15	16	18	17	16	16	16	14	16	15	16	14	15	16	18	17	16	16	16	14	16	15	16	14	15	16	18	17	16	16	16	2021-09-19	2021-09-19
O94823	O94823	2	2	2	Probable phospholipid-transporting ATPase VB	ATP10B		1	2	2	2	1	1	0	1	1	0	1	1	1	1	1	1	1	1	0	1	1	0	1	1	1	1	1	1	1	1	0	1	1	0	1	1	1	1	1	1	2021-08-01	2021-08-01
O94826	O94826	8	8	8	Mitochondrial import receptor subunit TOM70	TOMM70A		1	8	8	8	6	7	5	8	5	7	4	7	7	8	7	8	6	7	5	8	5	7	4	7	7	8	7	8	6	7	5	8	5	7	4	7	7	8	7	8	2021-09-21	2021-09-21
O94874	O94874	8	8	8	E3 UFM1-protein ligase 1	UFL1		1	8	8	8	7	5	6	7	8	6	5	6	8	6	7	7	7	5	6	7	8	6	5	6	8	6	7	7	7	5	6	7	8	6	5	6	8	6	7	7	2021-06-12	2021-06-12
O94888	O94888	2	2	2	UBX domain-containing protein 7	UBXN7		1	2	2	2	1	1	2	1	1	2	1	1	2	1	2	1	1	1	2	1	1	2	1	1	2	1	2	1	1	1	2	1	1	2	1	1	2	1	2	1	2021-01-06	2021-01-06
O94903	O94903	7	7	7	Proline synthase co-transcribed bacterial homolog protein	PROSC		1	7	7	7	4	4	4	5	4	3	4	4	4	6	4	1	4	4	4	5	4	3	4	4	4	6	4	1	4	4	4	5	4	3	4	4	4	6	4	1	32.7	32.7
O94905	O94905	15	15	12	Erlin-2	ERLIN2		1	15	15	12	14	13	14	11	13	13	12	13	12	13	12	11	14	13	14	11	13	13	12	13	12	13	12	11	11	10	11	8	10	10	9	10	9	10	10	8	50.1	50.1
O94906	O94906	4	4	4	Pre-mRNA-processing factor 6	PRPF6		1	4	4	4	2	3	4	2	3	3	0	2	3	4	4	2	2	3	4	2	3	3	0	2	3	4	4	2	2	3	4	2	3	3	0	2	3	4	4	2	2021-01-05	2021-01-05
O94925	O94925	10	10	10	Glutaminase kidney isoform, mitochondrial	GLS		1	10	10	10	7	8	8	8	8	8	7	8	6	6	8	8	7	8	8	8	8	8	7	8	6	6	8	8	7	8	8	8	8	8	7	8	6	6	8	8	2021-02-24	2021-02-24
O94973	O94973	8	4	4	AP-2 complex subunit alpha-2	AP2A2		1	8	4	4	5	6	3	7	8	6	7	6	8	7	7	5	2	3	0	4	4	2	3	3	4	3	3	2	2	3	0	4	4	2	3	3	4	3	3	2	15	2021-08-09
O94979	O94979	4	4	4	Protein transport protein Sec31A	SEC31A		1	4	4	4	4	3	3	2	3	3	4	3	2	2	3	3	4	3	3	2	3	3	4	3	2	2	3	3	4	3	3	2	3	3	4	3	2	2	3	3	2021-09-04	2021-09-04
O95059	O95059	1	1	1	Ribonuclease P protein subunit p14	RPP14		1	1	1	1	0	1	1	0	0	0	1	0	1	1	1	1	0	1	1	0	0	0	1	0	1	1	1	1	0	1	1	0	0	0	1	0	1	1	1	1	2021-09-12	2021-09-12
O95071	O95071	3	3	3	E3 ubiquitin-protein ligase UBR5	UBR5		1	3	3	3	1	1	1	0	1	1	1	1	1	1	3	1	1	1	1	0	1	1	1	1	1	1	3	1	1	1	1	0	1	1	1	1	1	1	3	1	2021-02-01	2021-02-01
O95139	O95139	2	2	2	NADH dehydrogenase [ubiquinone] 1 beta subcomplex subunit 6	NDUFB6		1	2	2	2	2	2	2	2	2	1	1	2	2	1	2	1	2	2	2	2	2	1	1	2	2	1	2	1	2	2	2	2	2	1	1	2	2	1	2	1	2021-03-27	2021-03-27
O95140	O95140	2	2	2	Mitofusin-2	MFN2		1	2	2	2	0	0	1	1	0	1	0	1	1	2	2	1	0	0	1	1	0	1	0	1	1	2	2	1	0	0	1	1	0	1	0	1	1	2	2	1	2021-02-04	2021-02-04
O95167	O95167	1	1	1	NADH dehydrogenase [ubiquinone] 1 alpha subcomplex subunit 3	NDUFA3		1	1	1	1	1	1	1	1	1	1	0	1	1	1	1	1	1	1	1	1	1	1	0	1	1	1	1	1	1	1	1	1	1	1	0	1	1	1	1	1	41.7	41.7
O95168	O95168	2	2	2	NADH dehydrogenase [ubiquinone] 1 beta subcomplex subunit 4	NDUFB4		1	2	2	2	0	1	1	1	0	0	0	1	1	0	2	1	0	1	1	1	0	0	0	1	1	0	2	1	0	1	1	1	0	0	0	1	1	0	2	1	24	24
O95182	O95182	4	4	4	NADH dehydrogenase [ubiquinone] 1 alpha subcomplex subunit 7	NDUFA7		1	4	4	4	2	4	3	4	4	3	3	4	3	3	4	4	2	4	3	4	4	3	3	4	3	3	4	4	2	4	3	4	4	3	3	4	3	3	4	4	33.6	33.6
O95197	O95197	1	1	1	Reticulon-3	RTN3		1	1	1	1	0	0	0	0	0	0	0	0	0	0	0	1	0	0	0	0	0	0	0	0	0	0	0	1	0	0	0	0	0	0	0	0	0	0	0	1	2021-08-03	2021-08-03
O95202	O95202	14	14	14	LETM1 and EF-hand domain-containing protein 1, mitochondrial	LETM1		1	14	14	14	10	12	13	12	13	13	11	13	12	12	11	11	10	12	13	12	13	13	11	13	12	12	11	11	10	12	13	12	13	13	11	13	12	12	11	11	2021-05-24	2021-05-24
O95232	O95232	1	1	1	Luc7-like protein 3	LUC7L3		1	1	1	1	0	0	1	1	1	1	1	0	1	0	1	1	0	0	1	1	1	1	1	0	1	0	1	1	0	0	1	1	1	1	1	0	1	0	1	1	2021-07-03	2021-07-03
O95249	O95249	1	1	1	Golgi SNAP receptor complex member 1	GOSR1		1	1	1	1	1	1	1	1	1	1	1	1	1	1	1	1	1	1	1	1	1	1	1	1	1	1	1	1	1	1	1	1	1	1	1	1	1	1	1	1	2021-02-05	2021-02-05
O95292	O95292	4	3	3	Vesicle-associated membrane protein-associated protein B/C	VAPB		1	4	3	3	3	4	3	3	3	4	3	4	2	4	4	4	3	3	3	3	3	3	2	3	2	3	3	3	3	3	3	3	3	3	2	3	2	3	3	3	2021-09-16	2021-09-11
O95299	O95299	9	9	9	NADH dehydrogenase [ubiquinone] 1 alpha subcomplex subunit 10, mitochondrial	NDUFA10		1	9	9	9	6	7	5	6	5	7	5	7	6	5	6	5	6	7	5	6	5	7	5	7	6	5	6	5	6	7	5	6	5	7	5	7	6	5	6	5	36.1	36.1
O95319	O95319	9	9	7	CUGBP Elav-like family member 2	CELF2		1	9	9	7	7	8	7	7	9	8	8	9	7	9	9	9	7	8	7	7	9	8	8	9	7	9	9	9	5	6	5	5	7	6	6	7	5	7	7	7	2021-03-19	2021-03-19
O95336	O95336	15	15	15	6-phosphogluconolactonase	PGLS		1	15	15	15	13	15	12	15	14	14	15	14	15	14	15	14	13	15	12	15	14	14	15	14	15	14	15	14	13	15	12	15	14	14	15	14	15	14	15	14	88.4	88.4
O95352	O95352	10	10	10	Ubiquitin-like modifier-activating enzyme ATG7	ATG7		1	10	10	10	8	7	4	6	8	9	7	7	7	9	6	6	8	7	4	6	8	9	7	7	7	9	6	6	8	7	4	6	8	9	7	7	7	9	6	6	2021-09-22	2021-09-22
O95365	O95365	1	1	1	Zinc finger and BTB domain-containing protein 7A	ZBTB7A		1	1	1	1	1	1	1	0	1	1	0	0	0	1	1	0	1	1	1	0	1	1	0	0	0	1	1	0	1	1	1	0	1	1	0	0	0	1	1	0	2021-06-02	2021-06-02
O95372	O95372	2	2	2	Acyl-protein thioesterase 2	LYPLA2		1	2	2	2	2	1	2	2	2	2	2	2	2	2	2	2	2	1	2	2	2	2	2	2	2	2	2	2	2	1	2	2	2	2	2	2	2	2	2	2	2021-03-11	2021-03-11
O95373	O95373	8	8	8	Importin-7	IPO7		1	8	8	8	4	6	8	7	7	7	3	7	6	4	6	6	4	6	8	7	7	7	3	7	6	4	6	6	4	6	8	7	7	7	3	7	6	4	6	6	2021-01-08	2021-01-08
O95379	O95379	1	1	1	Tumor necrosis factor alpha-induced protein 8	TNFAIP8		1	1	1	1	1	1	0	0	1	1	1	1	1	1	1	0	1	1	0	0	1	1	1	1	1	1	1	0	1	1	0	0	1	1	1	1	1	1	1	0	2021-01-10	2021-01-10
O95433	O95433	4	4	4	Activator of 90 kDa heat shock protein ATPase homolog 1	AHSA1		1	4	4	4	1	3	2	3	4	4	3	3	3	3	4	3	1	3	2	3	4	4	3	3	3	3	4	3	1	3	2	3	4	4	3	3	3	3	4	3	2021-05-19	2021-05-19
O95456	O95456	1	1	1	Proteasome assembly chaperone 1	PSMG1		1	1	1	1	0	1	1	1	1	0	0	1	0	1	1	1	0	1	1	1	1	0	0	1	0	1	1	1	0	1	1	1	1	0	0	1	0	1	1	1	2021-05-03	2021-05-03
O95466	O95466	14	14	12	Formin-like protein 1	FMNL1		1	14	14	12	12	12	10	12	13	12	12	13	13	12	11	11	12	12	10	12	13	12	12	13	13	12	11	11	10	10	9	10	11	10	10	11	11	10	9	10	2021-02-12	2021-02-12
O95479	O95479	9	9	9	GDH/6PGL endoplasmic bifunctional protein;Glucose 1-dehydrogenase;6-phosphogluconolactonase	H6PD		1	9	9	9	6	7	6	7	8	8	6	8	6	7	6	6	6	7	6	7	8	8	6	8	6	7	6	6	6	7	6	7	8	8	6	8	6	7	6	6	2021-01-20	2021-01-20
O95486	O95486	1	1	1	Protein transport protein Sec24A	SEC24A		1	1	1	1	1	0	0	1	1	1	1	1	1	1	1	1	1	0	0	1	1	1	1	1	1	1	1	1	1	0	0	1	1	1	1	1	1	1	1	1	2021-07-01	2021-07-01
O95487	O95487	3	3	3	Protein transport protein Sec24B	SEC24B		1	3	3	3	2	2	2	3	3	3	2	3	2	2	2	3	2	2	2	3	3	3	2	3	2	2	2	3	2	2	2	3	3	3	2	3	2	2	2	3	2021-08-03	2021-08-03
O95563	O95563	2	2	2	Mitochondrial pyruvate carrier 2	MPC2		1	2	2	2	1	1	2	1	1	1	1	1	1	2	2	2	1	1	2	1	1	1	1	1	1	2	2	2	1	1	2	1	1	1	1	1	1	2	2	2	2021-03-17	2021-03-17
O95571	O95571	11	11	11	Persulfide dioxygenase ETHE1, mitochondrial	ETHE1		1	11	11	11	9	10	8	8	8	8	7	9	9	9	10	9	9	10	8	8	8	8	7	9	9	9	10	9	9	10	8	8	8	8	7	9	9	9	10	9	60.6	60.6
O95573	O95573	8	7	7	Long-chain-fatty-acid--CoA ligase 3	ACSL3		1	8	7	7	7	5	7	8	5	6	6	6	5	5	6	5	6	4	6	7	4	5	5	5	4	4	5	4	6	4	6	7	4	5	5	5	4	4	5	4	2021-09-17	2021-06-15
O95613	O95613	2	2	2	Pericentrin	PCNT		1	2	2	2	0	0	0	2	1	1	1	1	1	1	2	0	0	0	0	2	1	1	1	1	1	1	2	0	0	0	0	2	1	1	1	1	1	1	2	0	0.6	0.6
O95630	O95630	3	3	3	STAM-binding protein	STAMBP		1	3	3	3	2	2	3	3	3	1	2	2	1	2	2	2	2	2	3	3	3	1	2	2	1	2	2	2	2	2	3	3	3	1	2	2	1	2	2	2	2021-09-09	2021-09-09
O95747	O95747	2	2	2	Serine/threonine-protein kinase OSR1	OXSR1		1	2	2	2	0	1	2	1	1	2	1	1	1	0	2	1	0	1	2	1	1	2	1	1	1	0	2	1	0	1	2	1	1	2	1	1	1	0	2	1	2021-04-04	2021-04-04
O95758	O95758	6	3	3	Polypyrimidine tract-binding protein 3	PTBP3		1	6	3	3	4	5	6	5	5	5	6	5	6	5	6	6	1	2	3	2	2	2	3	2	3	2	3	3	1	2	3	2	2	2	3	2	3	2	3	3	2021-09-12	2021-02-09
O95777	O95777	4	4	4	U6 snRNA-associated Sm-like protein LSm8	LSM8		1	4	4	4	3	3	3	2	2	3	2	4	3	3	4	2	3	3	3	2	2	3	2	4	3	3	4	2	3	3	3	2	2	3	2	4	3	3	4	2	56.2	56.2
O95782	O95782	14	14	10	AP-2 complex subunit alpha-1	AP2A1		1	14	14	10	12	11	11	11	13	13	12	12	12	12	13	12	12	11	11	11	13	13	12	12	12	12	13	12	9	8	8	8	9	9	8	9	8	8	9	9	2021-03-19	2021-03-19
O95807	O95807	1	1	1	Transmembrane protein 50A	TMEM50A		1	1	1	1	1	1	0	1	1	1	1	1	1	1	1	1	1	1	0	1	1	1	1	1	1	1	1	1	1	1	0	1	1	1	1	1	1	1	1	1	2021-01-05	2021-01-05
O95816	O95816	5	5	5	BAG family molecular chaperone regulator 2	BAG2		1	5	5	5	5	5	4	5	4	4	5	5	4	4	5	5	5	5	4	5	4	4	5	5	4	4	5	5	5	5	4	5	4	4	5	5	4	4	5	5	2021-03-30	2021-03-30
O95817	O95817	1	1	1	BAG family molecular chaperone regulator 3	BAG3		1	1	1	1	0	1	1	1	1	1	0	1	1	1	0	1	0	1	1	1	1	1	0	1	1	1	0	1	0	1	1	1	1	1	0	1	1	1	0	1	2021-05-04	2021-05-04
O95819;Q8N4C8;Q9UKE5	O95819;Q8N4C8;Q9UKE5	3;2;2	3;2;2	3;2;2	Mitogen-activated protein kinase kinase kinase kinase 4;Misshapen-like kinase 1;TRAF2 and NCK-interacting protein kinase	MAP4K4;MINK1;TNIK	;;	3	3	3	3	2	3	3	3	2	2	1	2	3	3	1	3	2	3	3	3	2	2	1	2	3	3	1	3	2	3	3	3	2	2	1	2	3	3	1	3	2021-08-03	2021-08-03
O95825	O95825	2	2	2	Quinone oxidoreductase-like protein 1	CRYZL1		1	2	2	2	1	2	1	2	0	2	2	2	2	2	2	2	1	2	1	2	0	2	2	2	2	2	2	2	1	2	1	2	0	2	2	2	2	2	2	2	2021-03-12	2021-03-12
O95831	O95831	16	16	16	Apoptosis-inducing factor 1, mitochondrial	AIFM1		1	16	16	16	10	12	12	12	11	13	13	12	11	13	12	11	10	12	12	12	11	13	13	12	11	13	12	11	10	12	12	12	11	13	13	12	11	13	12	11	36.7	36.7
O95834	O95834	3	3	3	Echinoderm microtubule-associated protein-like 2	EML2		1	3	3	3	2	2	2	3	3	3	3	2	3	2	2	2	2	2	2	3	3	3	3	2	3	2	2	2	2	2	2	3	3	3	3	2	3	2	2	2	2021-07-07	2021-07-07
O95848	O95848	1	1	1	Uridine diphosphate glucose pyrophosphatase	NUDT14		1	1	1	1	0	0	0	0	0	1	0	0	0	1	1	1	0	0	0	0	0	1	0	0	0	1	1	1	0	0	0	0	0	1	0	0	0	1	1	1	2021-08-15	2021-08-15
O95861	O95861	5	5	5	3(2),5-bisphosphate nucleotidase 1	BPNT1		1	5	5	5	4	3	4	4	3	4	1	5	4	4	5	3	4	3	4	4	3	4	1	5	4	4	5	3	4	3	4	4	3	4	1	5	4	4	5	3	2021-05-19	2021-05-19
O95870	O95870	2	2	2	Abhydrolase domain-containing protein 16A	ABHD16A		1	2	2	2	2	1	2	2	2	2	1	2	2	2	2	2	2	1	2	2	2	2	1	2	2	2	2	2	2	1	2	2	2	2	1	2	2	2	2	2	2021-08-03	2021-08-03
O95881	O95881	7	7	7	Thioredoxin domain-containing protein 12	TXNDC12		1	7	7	7	5	6	4	7	7	6	4	7	7	7	6	5	5	6	4	7	7	6	4	7	7	7	6	5	5	6	4	7	7	6	4	7	7	7	6	5	56.4	56.4
O95926	O95926	1	1	1	Pre-mRNA-splicing factor SYF2	SYF2		1	1	1	1	0	0	0	0	0	1	1	1	0	0	1	0	0	0	0	0	0	1	1	1	0	0	1	0	0	0	0	0	0	1	1	1	0	0	1	0	2021-09-11	2021-09-11
O95983	O95983	2	2	2	Methyl-CpG-binding domain protein 3	MBD3		1	2	2	2	1	1	2	2	2	2	0	2	1	2	1	2	1	1	2	2	2	2	0	2	1	2	1	2	1	1	2	2	2	2	0	2	1	2	1	2	2021-05-05	2021-05-05
O96000	O96000	7	7	7	NADH dehydrogenase [ubiquinone] 1 beta subcomplex subunit 10	NDUFB10		1	7	7	7	7	6	7	6	6	7	5	6	6	5	6	6	7	6	7	6	6	7	5	6	6	5	6	6	7	6	7	6	6	7	5	6	6	5	6	6	46.5	46.5
O96008	O96008	1	1	1	Mitochondrial import receptor subunit TOM40 homolog	TOMM40		1	1	1	1	0	1	0	1	1	1	0	1	1	1	1	1	0	1	0	1	1	1	0	1	1	1	1	1	0	1	0	1	1	1	0	1	1	1	1	1	2021-04-09	2021-04-09
O96011	O96011	4	4	4	Peroxisomal membrane protein 11B	PEX11B		1	4	4	4	3	4	3	4	3	3	3	3	3	4	4	3	3	4	3	4	3	3	3	3	3	4	4	3	3	4	3	4	3	3	3	3	3	4	4	3	2021-08-17	2021-08-17
O96019	O96019	4	4	4	Actin-like protein 6A	ACTL6A		1	4	4	4	2	3	3	3	3	2	2	3	3	4	3	4	2	3	3	3	3	2	2	3	3	4	3	4	2	3	3	3	3	2	2	3	3	4	3	4	2021-08-19	2021-08-19
P00338	P00338	23	23	21	L-lactate dehydrogenase A chain	LDHA		1	23	23	21	22	22	22	23	22	22	22	23	22	22	22	23	22	22	22	23	22	22	22	23	22	22	22	23	20	20	20	21	20	20	20	21	20	20	20	21	66.3	66.3
P00367	P00367	30	30	12	Glutamate dehydrogenase 1, mitochondrial	GLUD1		1	30	30	12	28	29	27	28	28	27	27	29	27	28	27	28	28	29	27	28	28	27	27	29	27	28	27	28	11	12	11	11	10	11	10	12	11	11	11	11	63.1	63.1
P00374	P00374	1	1	1	Dihydrofolate reductase	DHFR		1	1	1	1	0	1	1	1	1	1	0	0	1	1	1	1	0	1	1	1	1	1	0	0	1	1	1	1	0	1	1	1	1	1	0	0	1	1	1	1	2021-06-08	2021-06-08
P00387	P00387	9	9	9	NADH-cytochrome b5 reductase 3;NADH-cytochrome b5 reductase 3 membrane-bound form;NADH-cytochrome b5 reductase 3 soluble form	CYB5R3		1	9	9	9	9	9	8	8	9	9	8	8	7	9	9	8	9	9	8	8	9	9	8	8	7	9	9	8	9	9	8	8	9	9	8	8	7	9	9	8	43.2	43.2
P00390	P00390	13	13	13	Glutathione reductase, mitochondrial	GSR		1	13	13	13	12	13	11	12	13	12	11	12	11	12	11	11	12	13	11	12	13	12	11	12	11	12	11	11	12	13	11	12	13	12	11	12	11	12	11	11	35.1	35.1
P00403	P00403	6	6	6	Cytochrome c oxidase subunit 2	MT-CO2		1	6	6	6	5	6	4	6	5	5	4	4	4	5	6	4	5	6	4	6	5	5	4	4	4	5	6	4	5	6	4	6	5	5	4	4	4	5	6	4	41	41
P00441	P00441	8	8	8	Superoxide dismutase [Cu-Zn]	SOD1		1	8	8	8	8	8	8	8	8	8	8	8	8	7	8	8	8	8	8	8	8	8	8	8	8	7	8	8	8	8	8	8	8	8	8	8	8	7	8	8	82.5	82.5
P00491	P00491	17	17	17	Purine nucleoside phosphorylase	PNP		1	17	17	17	10	12	11	14	13	14	16	16	16	15	15	15	10	12	11	14	13	14	16	16	16	15	15	15	10	12	11	14	13	14	16	16	16	15	15	15	66.8	66.8
P00492	P00492	3	3	3	Hypoxanthine-guanine phosphoribosyltransferase	HPRT1		1	3	3	3	2	3	1	2	1	1	3	3	2	1	2	2	2	3	1	2	1	1	3	3	2	1	2	2	2	3	1	2	1	1	3	3	2	1	2	2	2021-05-16	2021-05-16
P00505	P00505	8	8	8	Aspartate aminotransferase, mitochondrial	GOT2		1	8	8	8	6	8	6	7	4	5	6	5	5	5	8	5	6	8	6	7	4	5	6	5	5	5	8	5	6	8	6	7	4	5	6	5	5	5	8	5	2021-03-25	2021-03-25
P00558;P07205	P00558	37;6	37;6	37;6	Phosphoglycerate kinase 1	PGK1		2	37	37	37	33	36	35	37	35	35	33	36	35	35	37	35	33	36	35	37	35	35	33	36	35	35	37	35	33	36	35	37	35	35	33	36	35	35	37	35	83.5	83.5
P00568;Q9Y6K8	P00568	11;1	11;1	11;1	Adenylate kinase isoenzyme 1	AK1		2	11	11	11	10	10	11	10	10	9	8	10	9	10	9	10	10	10	11	10	10	9	8	10	9	10	9	10	10	10	11	10	10	9	8	10	9	10	9	10	58.8	58.8
P00846	P00846	1	1	1	ATP synthase subunit a	MT-ATP6		1	1	1	1	1	1	1	1	1	1	1	1	1	1	1	1	1	1	1	1	1	1	1	1	1	1	1	1	1	1	1	1	1	1	1	1	1	1	1	1	2021-04-04	2021-04-04
P00918	P00918	22	22	22	Carbonic anhydrase 2	CA2		1	22	22	22	21	21	22	22	21	20	19	20	20	21	22	20	21	21	22	22	21	20	19	20	20	21	22	20	21	21	22	22	21	20	19	20	20	21	22	20	76.5	76.5
P00966	P00966	5	5	5	Argininosuccinate synthase	ASS1		1	5	5	5	4	4	2	5	5	4	3	3	4	4	4	3	4	4	2	5	5	4	3	3	4	4	4	3	4	4	2	5	5	4	3	3	4	4	4	3	2021-01-14	2021-01-14
P01019	P01019	2	2	2	Angiotensinogen;Angiotensin-1;Angiotensin-2;Angiotensin-3;Angiotensin-4;Angiotensin 1-9;Angiotensin 1-7;Angiotensin 1-5;Angiotensin 1-4	AGT		1	2	2	2	0	2	1	2	1	1	2	0	1	2	2	0	0	2	1	2	1	1	2	0	1	2	2	0	0	2	1	2	1	1	2	0	1	2	2	0	2021-02-08	2021-02-08
P01023	P01023	2	2	2	Alpha-2-macroglobulin	A2M		1	2	2	2	2	2	1	2	2	2	2	2	2	2	2	2	2	2	1	2	2	2	2	2	2	2	2	2	2	2	1	2	2	2	2	2	2	2	2	2	2021-03-02	2021-03-02
P01024	P01024	1	1	1	Complement C3;Complement C3 beta chain;C3-beta-c;Complement C3 alpha chain;C3a anaphylatoxin;Acylation stimulating protein;Complement C3b alpha chain;Complement C3c alpha chain fragment 1;Complement C3dg fragment;Complement C3g fragment;Complement C3d fragment;Complement C3f fragment;Complement C3c alpha chain fragment 2	C3		1	1	1	1	1	1	1	0	1	1	1	1	1	0	1	0	1	1	1	0	1	1	1	1	1	0	1	0	1	1	1	0	1	1	1	1	1	0	1	0	1	1
P01034	P01034	2	2	2	Cystatin-C	CST3		1	2	2	2	2	2	2	2	2	2	2	1	2	2	2	2	2	2	2	2	2	2	2	1	2	2	2	2	2	2	2	2	2	2	2	1	2	2	2	2	2021-02-19	2021-02-19
P01111;P01116;P01112	P01111;P01116;P01112	4;3;3	4;3;3	4;3;3	GTPase NRas;GTPase KRas;GTPase KRas, N-terminally processed;GTPase HRas;GTPase HRas, N-terminally processed	NRAS;KRAS;HRAS	;;	3	4	4	4	4	4	4	4	4	4	4	3	3	3	4	4	4	4	4	4	4	4	4	3	3	3	4	4	4	4	4	4	4	4	4	3	3	3	4	4	33.3	33.3
P01137	P01137	1	1	1	Transforming growth factor beta-1;Latency-associated peptide	TGFB1		1	1	1	1	1	1	1	1	1	1	1	1	1	1	1	1	1	1	1	1	1	1	1	1	1	1	1	1	1	1	1	1	1	1	1	1	1	1	1	1	2021-07-08	2021-07-08
P01584	P01584	2	2	2	Interleukin-1 beta	IL1B		1	2	2	2	2	0	0	0	2	2	2	1	2	0	0	0	2	0	0	0	2	2	2	1	2	0	0	0	2	0	0	0	2	2	2	1	2	0	0	0	2021-08-10	2021-08-10
P01892;P30459;P10314;P30512;P16189	P01892;P30459;P10314	14;8;8;6;6	14;8;8;6;6	1;0;0;0;0	HLA class I histocompatibility antigen, A-2 alpha chain;HLA class I histocompatibility antigen, A-74 alpha chain;HLA class I histocompatibility antigen, A-32 alpha chain	HLA-A	;;	5	14	14	1	13	14	14	14	14	13	12	14	14	13	13	14	13	14	14	14	14	13	12	14	14	13	13	14	0	1	1	1	1	1	1	1	1	1	1	1	57	57
P02545	P02545	64	64	62	Prelamin-A/C;Lamin-A/C	LMNA		1	64	64	62	54	55	54	58	56	54	55	59	57	57	54	56	54	55	54	58	56	54	55	59	57	57	54	56	53	54	52	56	54	53	53	57	56	55	52	54	76.1	76.1
P02652	P02652	3	3	3	Apolipoprotein A-II;Proapolipoprotein A-II;Truncated apolipoprotein A-II	APOA2		1	3	3	3	2	1	2	3	2	2	2	1	3	2	1	3	2	1	2	3	2	2	2	1	3	2	1	3	2	1	2	3	2	2	2	1	3	2	1	3	43	43
P02686	P02686	2	2	2	Myelin basic protein	MBP		1	2	2	2	2	2	2	2	2	2	2	2	2	2	2	2	2	2	2	2	2	2	2	2	2	2	2	2	2	2	2	2	2	2	2	2	2	2	2	2	2021-09-07	2021-09-07
P02786	P02786	8	8	8	Transferrin receptor protein 1;Transferrin receptor protein 1, serum form	TFRC		1	8	8	8	6	7	6	5	7	6	5	5	6	5	6	4	6	7	6	5	7	6	5	5	6	5	6	4	6	7	6	5	7	6	5	5	6	5	6	4	2021-08-12	2021-08-12
P02792	P02792	2	2	2	Ferritin light chain	FTL		1	2	2	2	2	1	2	1	1	2	1	2	1	2	2	2	2	1	2	1	1	2	1	2	1	2	2	2	2	1	2	1	1	2	1	2	1	2	2	2	2021-07-17	2021-07-17
P80297;P02795;P13640;CON__P67983;Q8N339;P04732;P80294;P04731	P80297;P02795;P13640;CON__P67983;Q8N339;P04732	3;3;3;2;2;2;1;1	3;3;3;2;2;2;1;1	3;3;3;2;2;2;1;1	Metallothionein-1X;Metallothionein-2;Metallothionein-1G;Metallothionein-1M;Metallothionein-1E	MT1X;MT2A;MT1G;MT1M;MT1E	;;;;;	8	3	3	3	1	3	3	3	2	2	1	2	2	3	3	3	1	3	3	3	2	2	1	2	2	3	3	3	1	3	3	3	2	2	1	2	2	3	3	3	34.4	34.4
P03928	P03928	2	2	2	ATP synthase protein 8	MT-ATP8		1	2	2	2	1	1	1	2	2	2	0	2	2	2	1	2	1	1	1	2	2	2	0	2	2	2	1	2	1	1	1	2	2	2	0	2	2	2	1	2	2021-04-29	2021-04-29
P04040	P04040	26	26	26	Catalase	CAT		1	26	26	26	16	23	17	22	20	21	18	21	23	23	25	18	16	23	17	22	20	21	18	21	23	23	25	18	16	23	17	22	20	21	18	21	23	23	25	18	64.7	64.7
P04062	P04062	10	10	10	Glucosylceramidase	GBA		1	10	10	10	10	7	4	6	9	9	7	7	8	7	7	9	10	7	4	6	9	9	7	7	8	7	7	9	10	7	4	6	9	9	7	7	8	7	7	9	33.2	33.2
P04066	P04066	4	4	4	Tissue alpha-L-fucosidase	FUCA1		1	4	4	4	4	4	4	4	3	4	4	4	4	3	4	3	4	4	4	4	3	4	4	4	4	3	4	3	4	4	4	4	3	4	4	4	4	3	4	3	2021-08-08	2021-08-08
P04075;P05062	P04075	43;1	43;1	37;0	Fructose-bisphosphate aldolase A	ALDOA		2	43	43	37	38	41	40	41	40	41	39	41	42	37	41	39	38	41	40	41	40	41	39	41	42	37	41	39	34	36	34	35	35	37	34	35	36	33	36	35	93.7	93.7
P04080	P04080	5	5	5	Cystatin-B	CSTB		1	5	5	5	3	5	5	5	5	5	5	5	5	5	5	5	3	5	5	5	5	5	5	5	5	5	5	5	3	5	5	5	5	5	5	5	5	5	5	5	77.6	77.6
P04083	P04083	19	19	19	Annexin A1	ANXA1		1	19	19	19	15	18	18	19	18	18	16	19	18	18	18	18	15	18	18	19	18	18	16	19	18	18	18	18	15	18	18	19	18	18	16	19	18	18	18	18	60.4	60.4
P04150	P04150	2	2	2	Glucocorticoid receptor	NR3C1		1	2	2	2	2	2	2	2	2	2	1	2	2	2	2	2	2	2	2	2	2	2	1	2	2	2	2	2	2	2	2	2	2	2	1	2	2	2	2	2	2021-06-02	2021-06-02
P04179	P04179	2	2	2	Superoxide dismutase [Mn], mitochondrial	SOD2		1	2	2	2	2	2	1	2	2	2	2	2	2	1	2	2	2	2	1	2	2	2	2	2	2	1	2	2	2	2	1	2	2	2	2	2	2	1	2	2	2021-06-12	2021-06-12
P04181	P04181	7	7	7	Ornithine aminotransferase, mitochondrial;Ornithine aminotransferase, hepatic form;Ornithine aminotransferase, renal form	OAT		1	7	7	7	5	5	4	5	7	6	5	5	4	6	4	3	5	5	4	5	7	6	5	5	4	6	4	3	5	5	4	5	7	6	5	5	4	6	4	3	33	33
P04183	P04183	2	2	2	Thymidine kinase, cytosolic	TK1		1	2	2	2	0	1	2	0	0	0	0	1	1	1	1	1	0	1	2	0	0	0	0	1	1	1	1	1	0	1	2	0	0	0	0	1	1	1	1	1	2021-09-17	2021-09-17
P04233	P04233	1	1	1	HLA class II histocompatibility antigen gamma chain	CD74		1	1	1	1	1	1	1	1	1	1	1	1	1	1	1	1	1	1	1	1	1	1	1	1	1	1	1	1	1	1	1	1	1	1	1	1	1	1	1	1	2021-07-05	2021-07-05
P04406;WP_010883262.1;HPPMICFE_00364;O14556	P04406	27;1;1;1	27;1;1;1	27;1;1;1	Glyceraldehyde-3-phosphate dehydrogenase	GAPDH		4	27	27	27	23	27	21	24	24	25	25	25	26	23	27	24	23	27	21	24	24	25	25	25	26	23	27	24	23	27	21	24	24	25	25	25	26	23	27	24	84.5	84.5
P04424	P04424	3	3	3	Argininosuccinate lyase	ASL		1	3	3	3	1	3	3	3	1	2	2	2	2	1	2	3	1	3	3	3	1	2	2	2	2	1	2	3	1	3	3	3	1	2	2	2	2	1	2	3	2021-01-10	2021-01-10
P04632	P04632	6	6	6	Calpain small subunit 1	CAPNS1		1	6	6	6	4	5	4	6	4	5	5	5	5	5	5	4	4	5	4	6	4	5	5	5	5	5	5	4	4	5	4	6	4	5	5	5	5	5	5	4	35.1	35.1
P04792	P04792	14	14	14	Heat shock protein beta-1	HSPB1		1	14	14	14	13	14	13	14	14	14	14	14	14	14	14	14	13	14	13	14	14	14	14	14	14	14	14	14	13	14	13	14	14	14	14	14	14	14	14	14	86.8	86.8
P04839	P04839	10	10	10	Cytochrome b-245 heavy chain	CYBB		1	10	10	10	10	10	7	9	9	10	10	10	10	10	10	9	10	10	7	9	9	10	10	10	10	10	10	9	10	10	7	9	9	10	10	10	10	10	10	9	2021-01-22	2021-01-22
P04843	P04843	38	38	38	Dolichyl-diphosphooligosaccharide--protein glycosyltransferase subunit 1	RPN1		1	38	38	38	35	33	33	37	35	35	33	37	35	36	34	35	35	33	33	37	35	35	33	37	35	36	34	35	35	33	33	37	35	35	33	37	35	36	34	35	67.1	67.1
P04844	P04844	16	16	16	Dolichyl-diphosphooligosaccharide--protein glycosyltransferase subunit 2	RPN2		1	16	16	16	14	14	13	15	15	15	14	14	15	15	15	16	14	14	13	15	15	15	14	14	15	15	15	16	14	14	13	15	15	15	14	14	15	15	15	16	43.6	43.6
P04899;P63096;P09471;P11488;P19087;A8MTJ3;P38405	P04899	25;11;4;2;2;2;2	25;11;4;2;2;2;2	17;3;0;0;0;0;0	Guanine nucleotide-binding protein G(i) subunit alpha-2	GNAI2		7	25	25	17	19	20	18	21	20	22	22	22	22	21	21	16	19	20	18	21	20	22	22	22	22	21	21	16	13	14	12	15	13	15	15	16	16	15	15	10	71.3	71.3
Q93077;Q7L7L0;P04908;Q96QV6	Q93077;Q7L7L0;P04908	7;7;7;3	3;3;3;0	2;2;2;0	Histone H2A type 1-C;Histone H2A type 3;Histone H2A type 1-B/E	HIST1H2AC;HIST3H2A;HIST1H2AB	;;	4	7	3	2	7	7	7	7	7	7	7	7	7	7	7	7	3	3	3	3	3	3	3	3	3	3	3	3	2	2	2	2	2	2	2	2	2	2	2	2	57.7	36.2
P05023;P13637;P50993;Q13733;P54707;P20648	P05023	31;14;12;6;2;1	31;14;12;6;2;1	31;14;12;6;2;1	Sodium/potassium-transporting ATPase subunit alpha-1	ATP1A1		6	31	31	31	28	29	25	31	30	29	28	27	28	29	30	29	28	29	25	31	30	29	28	27	28	29	30	29	28	29	25	31	30	29	28	27	28	29	30	29	36.9	36.9
P05091	P05091	8	8	8	Aldehyde dehydrogenase, mitochondrial	ALDH2		1	8	8	8	5	6	6	5	8	8	4	8	7	8	6	7	5	6	6	5	8	8	4	8	7	8	6	7	5	6	6	5	8	8	4	8	7	8	6	7	2021-05-25	2021-05-25
P05107	P05107	40	40	40	Integrin beta-2	ITGB2		1	40	40	40	37	39	37	40	36	38	36	39	38	36	39	34	37	39	37	40	36	38	36	39	38	36	39	34	37	39	37	40	36	38	36	39	38	36	39	34	53.3	53.3
P05109	P05109	5	5	5	Protein S100-A8;Protein S100-A8, N-terminally processed	S100A8		1	5	5	5	3	2	2	3	4	4	5	4	5	1	2	2	3	2	2	3	4	4	5	4	5	1	2	2	3	2	2	3	4	4	5	4	5	1	2	2	36.6	36.6
P05114	P05114	2	2	2	Non-histone chromosomal protein HMG-14	HMGN1		1	2	2	2	0	1	1	2	1	1	1	1	1	1	1	1	0	1	1	2	1	1	1	1	1	1	1	1	0	1	1	2	1	1	1	1	1	1	1	1	14	14
P05141;Q9H0C2	P05141	19;3	19;3	9;0	ADP/ATP translocase 2;ADP/ATP translocase 2, N-terminally processed	SLC25A5		2	19	19	9	16	19	18	18	17	18	18	19	18	17	19	16	16	19	18	18	17	18	18	19	18	17	19	16	8	9	9	8	9	8	8	9	9	8	9	7	43.3	43.3
P05165	P05165	3	3	3	Propionyl-CoA carboxylase alpha chain, mitochondrial	PCCA		1	3	3	3	1	2	3	1	3	3	3	2	2	2	3	3	1	2	3	1	3	3	3	2	2	2	3	3	1	2	3	1	3	3	3	2	2	2	3	3	6	6
P05166	P05166	2	2	2	Propionyl-CoA carboxylase beta chain, mitochondrial	PCCB		1	2	2	2	1	2	2	2	0	2	0	2	1	2	2	2	1	2	2	2	0	2	0	2	1	2	2	2	1	2	2	2	0	2	0	2	1	2	2	2	2021-08-04	2021-08-04
P05198	P05198	13	13	13	Eukaryotic translation initiation factor 2 subunit 1	EIF2S1		1	13	13	13	11	12	12	12	13	12	11	11	12	12	12	11	11	12	12	12	13	12	11	11	12	12	12	11	11	12	12	12	13	12	11	11	12	12	12	11	47.6	47.6
P05204;Q15651	P05204;Q15651	1;1	1;1	1;1	Non-histone chromosomal protein HMG-17;High mobility group nucleosome-binding domain-containing protein 3	HMGN2;HMGN3	;	2	1	1	1	1	1	1	1	0	1	1	1	1	1	1	1	1	1	1	1	0	1	1	1	1	1	1	1	1	1	1	1	0	1	1	1	1	1	1	1	2021-04-14	2021-04-14
P05362	P05362	7	7	7	Intercellular adhesion molecule 1	ICAM1		1	7	7	7	6	5	4	4	7	7	6	7	7	5	5	4	6	5	4	4	7	7	6	7	7	5	5	4	6	5	4	4	7	7	6	7	7	5	5	4	2021-04-18	2021-04-18
P05386	P05386	5	5	5	60S acidic ribosomal protein P1	RPLP1		1	5	5	5	4	5	4	3	4	4	4	5	5	4	4	5	4	5	4	3	4	4	4	5	5	4	4	5	4	5	4	3	4	4	4	5	5	4	4	5	84.2	84.2
P05387	P05387	10	10	10	60S acidic ribosomal protein P2	RPLP2		1	10	10	10	8	9	8	10	8	8	9	9	8	8	10	9	8	9	8	10	8	8	9	9	8	8	10	9	8	9	8	10	8	8	9	9	8	8	10	9	78.3	78.3
P05388;Q8NHW5	P05388;Q8NHW5	15;10	15;10	15;10	60S acidic ribosomal protein P0;60S acidic ribosomal protein P0-like	RPLP0;RPLP0P6	;	2	15	15	15	15	14	12	14	14	15	15	15	15	15	15	14	15	14	12	14	14	15	15	15	15	15	15	14	15	14	12	14	14	15	15	15	15	15	15	14	43.2	43.2
P05455	P05455	17	17	17	Lupus La protein	SSB		1	17	17	17	12	14	12	14	15	14	15	15	15	14	15	14	12	14	12	14	15	14	15	15	15	14	15	14	12	14	12	14	15	14	15	15	15	14	15	14	41.7	41.7
P05556	P05556	18	18	18	Integrin beta-1	ITGB1		1	18	18	18	14	12	11	13	15	16	13	16	14	13	13	15	14	12	11	13	15	16	13	16	14	13	13	15	14	12	11	13	15	16	13	16	14	13	13	15	2021-09-28	2021-09-28
P06132	P06132	6	6	6	Uroporphyrinogen decarboxylase	UROD		1	6	6	6	6	5	5	6	6	6	4	6	6	6	6	6	6	5	5	6	6	6	4	6	6	6	6	6	6	5	5	6	6	6	4	6	6	6	6	6	27	27
P06280	P06280	8	8	8	Alpha-galactosidase A	GLA		1	8	8	8	8	6	6	7	7	7	7	7	6	8	7	6	8	6	6	7	7	7	7	7	6	8	7	6	8	6	6	7	7	7	7	7	6	8	7	6	2021-07-21	2021-07-21
P06396;CON__Q3SX14	P06396;CON__Q3SX14	46;23	46;23	46;23	Gelsolin	GSN	;	2	46	46	46	35	44	41	43	40	41	38	46	43	43	45	38	35	44	41	43	40	41	38	46	43	43	45	38	35	44	41	43	40	41	38	46	43	43	45	38	64.3	64.3
P06400	P06400	2	2	2	Retinoblastoma-associated protein	RB1		1	2	2	2	0	0	1	1	1	0	0	0	0	2	1	1	0	0	1	1	1	0	0	0	0	2	1	1	0	0	1	1	1	0	0	0	0	2	1	1	2021-04-02	2021-04-02
P06454	P06454	7	7	7	Prothymosin alpha;Prothymosin alpha, N-terminally processed;Thymosin alpha-1	PTMA		1	7	7	7	6	7	7	7	7	7	5	7	7	7	7	7	6	7	7	7	7	7	5	7	7	7	7	7	6	7	7	7	7	7	5	7	7	7	7	7	2021-06-30	2021-06-30
P06493;P11802;P50750;Q96Q40;O94921;Q07002;Q00536;Q9NYV4;Q14004	P06493	4;1;1;1;1;1;1;1;1	3;0;0;0;0;0;0;0;0	3;0;0;0;0;0;0;0;0	Cyclin-dependent kinase 1	CDK1		9	4	3	3	3	4	4	4	3	3	3	2	3	4	4	3	2	3	3	3	2	2	2	1	2	3	3	2	2	3	3	3	2	2	2	1	2	3	3	2	2021-05-18	2021-08-15
P06576	P06576	33	33	33	ATP synthase subunit beta, mitochondrial	ATP5B		1	33	33	33	32	33	29	33	32	33	31	32	33	32	30	32	32	33	29	33	32	33	31	32	33	32	30	32	32	33	29	33	32	33	31	32	33	32	30	32	75.4	75.4
P06702	P06702	7	7	7	Protein S100-A9	S100A9		1	7	7	7	5	4	4	4	6	6	6	7	7	2	4	3	5	4	4	4	6	6	6	7	7	2	4	3	5	4	4	4	6	6	6	7	7	2	4	3	78.1	78.1
P06703	P06703	6	6	6	Protein S100-A6	S100A6		1	6	6	6	6	6	5	5	6	6	6	6	5	6	5	5	6	6	5	5	6	6	6	6	5	6	5	5	6	6	5	5	6	6	6	6	5	6	5	5	56.7	56.7
P06730;A6NMX2	P06730	4;1	4;1	4;1	Eukaryotic translation initiation factor 4E	EIF4E		2	4	4	4	3	4	4	4	3	4	3	4	3	4	4	3	3	4	4	4	3	4	3	4	3	4	4	3	3	4	4	4	3	4	3	4	3	4	4	3	2021-09-12	2021-09-12
P06733;P13929	P06733	43;4	43;4	39;0	Alpha-enolase	ENO1		2	43	43	39	37	41	39	41	40	38	40	41	36	40	43	40	37	41	39	41	40	38	40	41	36	40	43	40	33	37	35	37	36	34	36	37	32	36	39	36	81.1	81.1
P06737;P11217	P06737	27;4	27;4	23;0	Glycogen phosphorylase, liver form	PYGL		2	27	27	23	16	21	22	25	22	21	20	20	22	24	23	20	16	21	22	25	22	21	20	20	22	24	23	20	13	18	18	21	18	17	16	16	19	20	19	16	33.2	33.2
P06744;Q8N196	P06744	14;1	14;1	12;1	Glucose-6-phosphate isomerase	GPI		2	14	14	12	14	13	14	13	14	14	12	14	14	13	13	14	14	13	14	13	14	14	12	14	14	13	13	14	12	11	12	11	12	12	10	12	12	11	11	12	36.7	36.7
P06748	P06748	20	20	20	Nucleophosmin	NPM1		1	20	20	20	18	20	18	20	19	18	17	19	19	18	20	19	18	20	18	20	19	18	17	19	19	18	20	19	18	20	18	20	19	18	17	19	19	18	20	19	57.5	57.5
P06753	P06753	19	10	10	Tropomyosin alpha-3 chain	TPM3		1	19	10	10	15	17	16	18	18	17	17	18	18	18	19	17	8	8	8	9	9	8	8	9	9	9	10	9	8	8	8	9	9	8	8	9	9	9	10	9	43.9	2021-06-24
P06756	P06756	3	3	3	Integrin alpha-V;Integrin alpha-V heavy chain;Integrin alpha-V light chain	ITGAV		1	3	3	3	3	3	3	3	3	3	2	3	3	3	2	3	3	3	3	3	3	3	2	3	3	3	2	3	3	3	3	3	3	3	2	3	3	3	2	3	2021-03-03	2021-03-03
P06858	P06858	2	2	2	Lipoprotein lipase	LPL		1	2	2	2	0	0	2	1	1	1	0	1	0	2	1	0	0	0	2	1	1	1	0	1	0	2	1	0	0	0	2	1	1	1	0	1	0	2	1	0	2021-07-05	2021-07-05
P06865	P06865	10	10	10	Beta-hexosaminidase subunit alpha	HEXA		1	10	10	10	8	7	8	9	6	7	7	8	7	7	8	8	8	7	8	9	6	7	7	8	7	7	8	8	8	7	8	9	6	7	7	8	7	7	8	8	2021-02-24	2021-02-24
Q16778;P33778;P23527;P06899;Q8N257;Q6DRA6;Q6DN03	Q16778;P33778;P23527;P06899;Q8N257	11;11;11;11;7;4;4	4;4;4;4;3;4;4	4;4;4;4;3;4;4	Histone H2B type 2-E;Histone H2B type 1-B;Histone H2B type 1-O;Histone H2B type 1-J;Histone H2B type 3-B	HIST2H2BE;HIST1H2BB;HIST1H2BO;HIST1H2BJ;HIST3H2BB	;;;;	7	11	4	4	10	11	10	11	11	11	10	11	11	10	10	11	4	4	4	4	4	4	4	4	4	4	3	4	4	4	4	4	4	4	4	4	4	4	3	4	55.6	2021-09-11
P07099	P07099	6	6	6	Epoxide hydrolase 1	EPHX1		1	6	6	6	4	5	5	6	4	6	5	5	6	5	5	5	4	5	5	6	4	6	5	5	6	5	5	5	4	5	5	6	4	6	5	5	6	5	5	5	2021-03-14	2021-03-14
P07108	P07108	6	6	6	Acyl-CoA-binding protein	DBI		1	6	6	6	4	4	4	5	5	5	5	5	5	5	6	5	4	4	4	5	5	5	5	5	5	5	6	5	4	4	4	5	5	5	5	5	5	5	6	5	78.2	78.2
P07195;Q6ZMR3;P07864	P07195	22;1;1	20;0;0	20;0;0	L-lactate dehydrogenase B chain	LDHB		3	22	20	20	21	22	19	21	22	22	22	22	22	21	21	22	19	20	17	19	20	20	20	20	20	19	19	20	19	20	17	19	20	20	20	20	20	19	19	20	59.9	52.4
P07203	P07203	12	12	12	Glutathione peroxidase 1	GPX1		1	12	12	12	9	11	10	11	10	11	8	10	11	11	11	10	9	11	10	11	10	11	8	10	11	11	11	10	9	11	10	11	10	11	8	10	11	11	11	10	70	70
P07237	P07237	41	41	41	Protein disulfide-isomerase	P4HB		1	41	41	41	36	38	34	38	38	36	39	38	37	36	40	35	36	38	34	38	38	36	39	38	37	36	40	35	36	38	34	38	38	36	39	38	37	36	40	35	72.2	72.2
P07305	P07305	8	8	8	Histone H1.0;Histone H1.0, N-terminally processed	H1F0		1	8	8	8	8	7	7	6	8	7	7	7	7	6	7	8	8	7	7	6	8	7	7	7	7	6	7	8	8	7	7	6	8	7	7	7	7	6	7	8	2021-04-30	2021-04-30
P07333	P07333	5	5	5	Macrophage colony-stimulating factor 1 receptor	CSF1R		1	5	5	5	4	3	4	5	5	5	4	5	5	5	4	4	4	3	4	5	5	5	4	5	5	5	4	4	4	3	4	5	5	5	4	5	5	5	4	4	2021-01-08	2021-01-08
P07339	P07339	30	30	30	Cathepsin D;Cathepsin D light chain;Cathepsin D heavy chain	CTSD		1	30	30	30	25	24	23	27	26	27	25	27	27	24	23	24	25	24	23	27	26	27	25	27	27	24	23	24	25	24	23	27	26	27	25	27	27	24	23	24	67.2	67.2
P07355;A6NMY6	P07355;A6NMY6	35;23	35;23	35;23	Annexin A2;Putative annexin A2-like protein	ANXA2;ANXA2P2	;	2	35	35	35	30	32	30	32	28	30	31	31	31	31	34	30	30	32	30	32	28	30	31	31	31	31	34	30	30	32	30	32	28	30	31	31	31	31	34	30	81.4	81.4
P07384	P07384	13	13	13	Calpain-1 catalytic subunit	CAPN1		1	13	13	13	10	12	11	13	13	12	13	13	13	13	13	12	10	12	11	13	13	12	13	13	13	13	13	12	10	12	11	13	13	12	13	13	13	13	13	12	2021-01-24	2021-01-24
P07437;A6NNZ2;CON__ENSEMBL:ENSBTAP00000025008;Q9H4B7	P07437	29;9;5;5	5;0;0;0	4;0;0;0	Tubulin beta chain	TUBB		4	29	5	4	25	26	23	28	26	25	26	27	27	27	26	27	4	4	4	5	4	4	5	4	4	5	4	5	3	3	3	4	3	3	4	3	3	4	3	4	61	2021-04-16
P07602	P07602	21	21	21	Prosaposin;Saposin-A;Saposin-B-Val;Saposin-B;Saposin-C;Saposin-D	PSAP		1	21	21	21	18	20	19	17	19	18	18	19	18	17	18	15	18	20	19	17	19	18	18	19	18	17	18	15	18	20	19	17	19	18	18	19	18	17	18	15	44.8	44.8
P07686	P07686	17	17	17	Beta-hexosaminidase subunit beta;Beta-hexosaminidase subunit beta chain B;Beta-hexosaminidase subunit beta chain A	HEXB		1	17	17	17	13	16	15	16	15	16	14	17	16	16	15	16	13	16	15	16	15	16	14	17	16	16	15	16	13	16	15	16	15	16	14	17	16	16	15	16	2021-03-31	2021-03-31
P07711	P07711	6	6	6	Cathepsin L1;Cathepsin L1 heavy chain;Cathepsin L1 light chain	CTSL		1	6	6	6	6	5	5	5	5	5	5	5	6	5	5	4	6	5	5	5	5	5	5	5	6	5	5	4	6	5	5	5	5	5	5	5	6	5	5	4	2021-08-28	2021-08-28
P07737;CON__P02584	P07737	17;5	17;5	17;5	Profilin-1	PFN1		2	17	17	17	15	15	15	16	14	15	13	15	16	15	16	14	15	15	15	16	14	15	13	15	16	15	16	14	15	15	15	16	14	15	13	15	16	15	16	14	79.3	79.3
P07741	P07741	11	11	11	Adenine phosphoribosyltransferase	APRT		1	11	11	11	9	10	7	8	8	10	9	10	10	10	10	10	9	10	7	8	8	10	9	10	10	10	10	10	9	10	7	8	8	10	9	10	10	10	10	10	71.1	71.1
P07814	P07814	50	50	50	Bifunctional glutamate/proline--tRNA ligase;Glutamate--tRNA ligase;Proline--tRNA ligase	EPRS		1	50	50	50	38	44	39	43	44	43	41	45	43	47	46	46	38	44	39	43	44	43	41	45	43	47	46	46	38	44	39	43	44	43	41	45	43	47	46	46	43.6	43.6
P07858	P07858	14	14	14	Cathepsin B;Cathepsin B light chain;Cathepsin B heavy chain	CTSB		1	14	14	14	13	14	14	14	13	13	13	14	14	13	13	12	13	14	14	14	13	13	13	14	14	13	13	12	13	14	14	14	13	13	13	14	14	13	13	12	41.6	41.6
P07900;Q14568;Q58FG0	P07900	54;8;5	35;2;2	35;2;2	Heat shock protein HSP 90-alpha	HSP90AA1		3	54	35	35	47	49	46	49	48	49	46	50	50	49	52	46	33	32	30	32	32	32	31	33	32	32	33	30	33	32	30	32	32	32	31	33	32	32	33	30	57.9	41.7
P07910;B2RXH8	P07910;B2RXH8	17;9	17;9	8;0	Heterogeneous nuclear ribonucleoproteins C1/C2;Heterogeneous nuclear ribonucleoprotein C-like 2	HNRNPC;HNRNPCL2	;	2	17	17	8	14	13	15	14	15	15	14	15	14	16	15	15	14	13	15	14	15	15	14	15	14	16	15	15	7	7	7	7	7	7	7	7	7	8	8	7	52.9	52.9
P07919;A0A096LP55	P07919	3;1	3;1	3;1	Cytochrome b-c1 complex subunit 6, mitochondrial	UQCRH		2	3	3	3	3	3	3	3	3	3	2	3	3	3	3	3	3	3	3	3	3	3	2	3	3	3	3	3	3	3	3	3	3	3	2	3	3	3	3	3	38.5	38.5
P12931;P07947;P06241	P12931;P07947;P06241	3;3;2	2;2;1	1;1;0	Proto-oncogene tyrosine-protein kinase Src;Tyrosine-protein kinase Yes;Tyrosine-protein kinase Fyn	SRC;YES1;FYN	;;	3	3	2	1	3	2	2	2	2	3	3	3	2	2	2	2	2	1	1	1	1	2	2	2	1	1	1	1	1	0	0	0	0	1	1	1	0	0	0	0	2021-08-05	2021-03-04
P07948	P07948	9	9	7	Tyrosine-protein kinase Lyn	LYN		1	9	9	7	7	8	7	7	8	7	8	7	7	8	7	8	7	8	7	7	8	7	8	7	7	8	7	8	5	6	5	5	6	5	6	5	5	6	5	6	2021-01-20	2021-01-20
P07954	P07954	9	9	9	Fumarate hydratase, mitochondrial	FH		1	9	9	9	9	8	7	9	7	9	8	9	8	9	8	9	9	8	7	9	7	9	8	9	8	9	8	9	9	8	7	9	7	9	8	9	8	9	8	9	2021-06-27	2021-06-27
P08133	P08133	36	36	36	Annexin A6	ANXA6		1	36	36	36	29	32	28	31	31	30	32	30	33	32	32	31	29	32	28	31	31	30	32	30	33	32	32	31	29	32	28	31	31	30	32	30	33	32	32	31	57.7	57.7
P08134;P62745	P08134	11;1	3;0	3;0	Rho-related GTP-binding protein RhoC	RHOC		2	11	3	3	9	11	10	11	11	11	10	11	10	10	11	10	1	3	3	3	3	3	2	3	3	2	3	3	1	3	3	3	3	3	2	3	3	2	3	3	56.5	2021-07-18
P08195	P08195	12	12	12	4F2 cell-surface antigen heavy chain	SLC3A2		1	12	12	12	10	9	9	10	9	10	9	10	12	10	11	10	10	9	9	10	9	10	9	10	12	10	11	10	10	9	9	10	9	10	9	10	12	10	11	10	2021-06-27	2021-06-27
P08236	P08236	7	7	7	Beta-glucuronidase	GUSB		1	7	7	7	5	6	5	5	5	5	4	5	7	6	7	5	5	6	5	5	5	5	4	5	7	6	7	5	5	6	5	5	5	5	4	5	7	6	7	5	2021-01-06	2021-01-06
P08237	P08237	2	1	1	ATP-dependent 6-phosphofructokinase, muscle type	PFKM		1	2	1	1	1	2	2	1	1	2	0	1	2	2	1	2	1	1	1	0	1	1	0	0	1	1	0	1	1	1	1	0	1	1	0	0	1	1	0	1	2021-03-03	2021-02-02
P08238;Q58FF7;Q58FG1	P08238	61;26;1	61;26;1	36;13;0	Heat shock protein HSP 90-beta	HSP90AB1		3	61	61	36	52	54	50	56	58	58	52	58	60	58	57	57	52	54	50	56	58	58	52	58	60	58	57	57	33	33	28	34	36	35	32	35	36	35	33	35	67.5	67.5
P08240	P08240	11	11	11	Signal recognition particle receptor subunit alpha	SRPR		1	11	11	11	8	10	9	8	10	8	7	9	9	9	9	10	8	10	9	8	10	8	7	9	9	9	9	10	8	10	9	8	10	8	7	9	9	9	9	10	2021-09-19	2021-09-19
P08397	P08397	4	4	4	Porphobilinogen deaminase	HMBS		1	4	4	4	4	3	3	4	4	3	4	4	4	4	4	4	4	3	3	4	4	3	4	4	4	4	4	4	4	3	3	4	4	3	4	4	4	4	4	4	2021-09-19	2021-09-19
P08559;P29803	P08559	13;3	13;3	13;3	Pyruvate dehydrogenase E1 component subunit alpha, somatic form, mitochondrial	PDHA1		2	13	13	13	11	11	10	12	11	11	10	11	8	10	10	11	11	11	10	12	11	11	10	11	8	10	10	11	11	11	10	12	11	11	10	11	8	10	10	11	36.2	36.2
P08567	P08567	13	13	13	Pleckstrin	PLEK		1	13	13	13	13	12	7	12	13	12	10	13	12	12	13	11	13	12	7	12	13	12	10	13	12	12	13	11	13	12	7	12	13	12	10	13	12	12	13	11	45.4	45.4
P08571	P08571	12	12	12	Monocyte differentiation antigen CD14;Monocyte differentiation antigen CD14, urinary form;Monocyte differentiation antigen CD14, membrane-bound form	CD14		1	12	12	12	11	10	11	9	11	12	12	12	12	7	11	8	11	10	11	9	11	12	12	12	12	7	11	8	11	10	11	9	11	12	12	12	12	7	11	8	45.6	45.6
P08574	P08574	6	6	6	Cytochrome c1, heme protein, mitochondrial	CYC1		1	6	6	6	5	4	5	5	5	5	5	5	5	5	6	5	5	4	5	5	5	5	5	5	5	5	6	5	5	4	5	5	5	5	5	5	5	5	6	5	2021-05-22	2021-05-22
P08575	P08575	12	12	12	Receptor-type tyrosine-protein phosphatase C	PTPRC		1	12	12	12	10	12	12	10	11	10	10	11	11	12	12	10	10	12	12	10	11	10	10	11	11	12	12	10	10	12	12	10	11	10	10	11	11	12	12	10	2021-09-11	2021-09-11
P08621	P08621	8	8	8	U1 small nuclear ribonucleoprotein 70 kDa	SNRNP70		1	8	8	8	5	5	5	4	6	6	5	4	5	6	5	5	5	5	5	4	6	6	5	4	5	6	5	5	5	5	5	4	6	6	5	4	5	6	5	5	2021-02-19	2021-02-19
P08631	P08631	3	1	1	Tyrosine-protein kinase HCK	HCK		1	3	1	1	3	3	3	3	3	3	3	3	3	3	3	2	1	1	1	1	1	1	1	1	1	1	1	0	1	1	1	1	1	1	1	1	1	1	1	0	2021-05-05	2021-06-03
P08648	P08648	13	13	13	Integrin alpha-5;Integrin alpha-5 heavy chain;Integrin alpha-5 light chain	ITGA5		1	13	13	13	9	12	10	12	11	11	10	10	12	13	12	11	9	12	10	12	11	11	10	10	12	13	12	11	9	12	10	12	11	11	10	10	12	13	12	11	2021-03-18	2021-03-18
P08670;P41219;P17661;CON__Q9DCV7;CON__Q3KNV1;CON__P08729;CON__P05787;P08729;P05787;CON__Q9H552;CON__Q9NSB2;CON__Q6ISB0;Q16352;Q9NSB2;P07197;CON__H-INV:HIT000292931;CON__Q61726;CON__O43790;CON__Q6NT21;CON__P78385;CON__Q14533;CON__P07744;CON__Q8VED5;CON__Q5XKE5;CON__O95678;CON__P48668;CON__P04259;CON__P02538;CON__P13647;CON__P12035;CON__Q01546;P14136;O43790;P78385;Q14533;Q5XKE5;P07196;O95678;P48668…	P08670	72;6;6;3;3;3;3;3;3;2;2;2;2;2;2;1;1;1;1;1;1;1;1;1;1;1;1;1;1;1;1;1;1;1;1;1;1;1;1;1;1;1;1;1;1	72;6;6;3;3;3;3;3;3;2;2;2;2;2;2;1;1;1;1;1;1;1;1;1;1;1;1;1;1;1;1;1;1;1;1;1;1;1;1;1;1;1;1;1;1	71;6;6;2;2;2;2;2;2;2;1;1;2;1;2;0;0;0;0;0;0;0;0;0;0;0;0;0;0;0;0;0;0;0;0;0;1;0;0;0;0;0;0;0;1	Vimentin	VIM		45	72	72	71	66	70	61	68	64	67	67	69	68	65	67	64	66	70	61	68	64	67	67	69	68	65	67	64	65	69	60	67	63	66	66	68	67	64	66	63	92.5	92.5
P08708	P08708	6	6	6	40S ribosomal protein S17	RPS17		1	6	6	6	4	5	5	5	5	6	5	6	6	4	6	5	4	5	5	5	5	6	5	6	6	4	6	5	4	5	5	5	5	6	5	6	6	4	6	5	52.6	52.6
P08754	P08754	13	5	5	Guanine nucleotide-binding protein G(k) subunit alpha	GNAI3		1	13	5	5	11	10	11	10	12	12	12	11	10	10	11	10	5	4	5	4	5	5	5	5	4	4	5	4	5	4	5	4	5	5	5	5	4	4	5	4	41.2	2021-05-21
P08758	P08758	20	20	20	Annexin A5	ANXA5		1	20	20	20	16	17	17	18	18	19	18	20	17	17	20	15	16	17	17	18	18	19	18	20	17	17	20	15	16	17	17	18	18	19	18	20	17	17	20	15	68.4	68.4
P08865	P08865	17	17	17	40S ribosomal protein SA	RPSA		1	17	17	17	16	17	13	17	16	16	15	17	17	16	16	17	16	17	13	17	16	16	15	17	17	16	16	17	16	17	13	17	16	16	15	17	17	16	16	17	64.1	64.1
P08962	P08962	2	2	2	CD63 antigen	CD63		1	2	2	2	1	2	2	2	2	2	0	2	2	2	2	1	1	2	2	2	2	2	0	2	2	2	2	1	1	2	2	2	2	2	0	2	2	2	2	1	2021-06-12	2021-06-12
P09012	P09012	6	6	5	U1 small nuclear ribonucleoprotein A	SNRPA		1	6	6	5	5	6	5	4	4	6	6	5	6	6	6	6	5	6	5	4	4	6	6	5	6	6	6	6	4	5	4	3	3	5	5	4	5	5	5	5	2021-06-20	2021-06-20
P09104	P09104	5	1	1	Gamma-enolase	ENO2		1	5	1	1	5	4	4	4	4	5	4	4	4	4	5	4	1	0	0	0	0	1	0	0	0	0	1	0	1	0	0	0	0	1	0	0	0	0	1	0	2021-01-16	3
P09110	P09110	13	13	13	3-ketoacyl-CoA thiolase, peroxisomal	ACAA1		1	13	13	13	10	10	10	10	11	10	8	10	10	11	10	9	10	10	10	10	11	10	8	10	10	11	10	9	10	10	10	10	11	10	8	10	10	11	10	9	50.7	50.7
P09132	P09132	2	2	2	Signal recognition particle 19 kDa protein	SRP19		1	2	2	2	1	1	2	1	2	1	1	1	1	1	1	1	1	1	2	1	2	1	1	1	1	1	1	1	1	1	2	1	2	1	1	1	1	1	1	1	2021-08-27	2021-08-27
P09211	P09211	9	9	9	Glutathione S-transferase P	GSTP1		1	9	9	9	9	9	9	9	9	9	9	9	9	9	9	9	9	9	9	9	9	9	9	9	9	9	9	9	9	9	9	9	9	9	9	9	9	9	9	9	53.8	53.8
P09234	P09234	3	3	3	U1 small nuclear ribonucleoprotein C	SNRPC		1	3	3	3	3	3	3	3	3	3	3	3	3	3	3	2	3	3	3	3	3	3	3	3	3	3	3	2	3	3	3	3	3	3	3	3	3	3	3	2	2021-08-25	2021-08-25
P09382	P09382	16	16	16	Galectin-1	LGALS1		1	16	16	16	15	16	13	15	15	15	16	15	14	15	14	16	15	16	13	15	15	15	16	15	14	15	14	16	15	16	13	15	15	15	16	15	14	15	14	16	95.6	95.6
P09417	P09417	2	2	2	Dihydropteridine reductase	QDPR		1	2	2	2	1	1	2	2	2	1	1	1	2	2	2	1	1	1	2	2	2	1	1	1	2	2	2	1	1	1	2	2	2	1	1	1	2	2	2	1	2021-03-12	2021-03-12
P09429;B2RPK0	P09429	11;5	11;5	8;3	High mobility group protein B1	HMGB1		2	11	11	8	10	10	10	10	11	11	11	11	10	10	11	10	10	10	10	10	11	11	11	11	10	10	11	10	7	7	8	8	8	8	8	8	7	8	8	8	50.7	50.7
P09493	P09493	9	1	1	Tropomyosin alpha-1 chain	TPM1		1	9	1	1	7	8	7	8	8	9	8	8	8	8	8	7	1	0	0	0	0	1	0	0	0	0	0	0	1	0	0	0	0	1	0	0	0	0	0	0	2021-01-21	2021-09-04
P09496	P09496	4	4	4	Clathrin light chain A	CLTA		1	4	4	4	3	3	4	3	3	4	3	4	3	3	3	3	3	3	4	3	3	4	3	4	3	3	3	3	3	3	4	3	3	4	3	4	3	3	3	3	2021-01-14	2021-01-14
P09497	P09497	7	7	7	Clathrin light chain B	CLTB		1	7	7	7	6	7	7	7	6	7	5	7	7	7	6	7	6	7	7	7	6	7	5	7	7	7	6	7	6	7	7	7	6	7	5	7	7	7	6	7	2021-05-20	2021-05-20
P09525	P09525	22	22	22	Annexin A4	ANXA4		1	22	22	22	16	22	19	20	18	17	18	19	18	21	19	17	16	22	19	20	18	17	18	19	18	21	19	17	16	22	19	20	18	17	18	19	18	21	19	17	65.2	65.2
P09543	P09543	8	8	8	2,3-cyclic-nucleotide 3-phosphodiesterase	CNP		1	8	8	8	6	6	6	6	4	5	7	6	6	7	5	5	6	6	6	6	4	5	7	6	6	7	5	5	6	6	6	6	4	5	7	6	6	7	5	5	2021-01-31	2021-01-31
P09601	P09601	7	7	7	Heme oxygenase 1	HMOX1		1	7	7	7	5	3	5	4	5	6	6	5	4	3	5	4	5	3	5	4	5	6	6	5	4	3	5	4	5	3	5	4	5	6	6	5	4	3	5	4	33	33
P09622	P09622	14	14	14	Dihydrolipoyl dehydrogenase, mitochondrial	DLD		1	14	14	14	12	11	11	11	12	11	13	11	12	11	12	12	12	11	11	11	12	11	13	11	12	11	12	12	12	11	11	11	12	11	13	11	12	11	12	12	34.8	34.8
P09651;Q32P51	P09651;Q32P51	23;12	23;12	23;12	Heterogeneous nuclear ribonucleoprotein A1;Heterogeneous nuclear ribonucleoprotein A1, N-terminally processed;Heterogeneous nuclear ribonucleoprotein A1-like 2	HNRNPA1;HNRNPA1L2	;	2	23	23	23	22	22	22	23	22	23	20	23	22	23	23	21	22	22	22	23	22	23	20	23	22	23	23	21	22	22	22	23	22	23	20	23	22	23	23	21	53.8	53.8
P09661	P09661	8	8	8	U2 small nuclear ribonucleoprotein A	SNRPA1		1	8	8	8	8	6	7	7	7	6	6	6	6	7	7	7	8	6	7	7	7	6	6	6	6	7	7	7	8	6	7	7	7	6	6	6	6	7	7	7	38.4	38.4
P09668	P09668	2	2	2	Pro-cathepsin H;Cathepsin H mini chain;Cathepsin H;Cathepsin H heavy chain;Cathepsin H light chain	CTSH		1	2	2	2	2	2	2	2	2	2	2	2	2	2	2	2	2	2	2	2	2	2	2	2	2	2	2	2	2	2	2	2	2	2	2	2	2	2	2	2	2021-02-07	2021-02-07
P09669	P09669	3	3	3	Cytochrome c oxidase subunit 6C	COX6C		1	3	3	3	3	2	2	3	3	3	3	3	3	3	2	2	3	2	2	3	3	3	3	3	3	3	2	2	3	2	2	3	3	3	3	3	3	3	2	2	37.3	37.3
P09874	P09874	43	43	43	Poly [ADP-ribose] polymerase 1	PARP1		1	43	43	43	34	38	36	39	39	40	30	37	38	40	38	36	34	38	36	39	39	40	30	37	38	40	38	36	34	38	36	39	39	40	30	37	38	40	38	36	46.5	46.5
P09914	P09914	5	5	5	Interferon-induced protein with tetratricopeptide repeats 1	IFIT1		1	5	5	5	3	3	2	2	4	3	5	4	4	3	1	2	3	3	2	2	4	3	5	4	4	3	1	2	3	3	2	2	4	3	5	4	4	3	1	2	2021-06-12	2021-06-12
P09917	P09917	2	2	2	Arachidonate 5-lipoxygenase	ALOX5		1	2	2	2	1	1	2	1	2	2	2	2	1	2	1	1	1	1	2	1	2	2	2	2	1	2	1	1	1	1	2	1	2	2	2	2	1	2	1	1	2021-05-02	2021-05-02
P09960	P09960	18	18	18	Leukotriene A-4 hydrolase	LTA4H		1	18	18	18	15	17	16	17	17	17	16	17	18	17	16	15	15	17	16	17	17	17	16	17	18	17	16	15	15	17	16	17	17	17	16	17	18	17	16	15	42.1	42.1
P09972	P09972	9	3	3	Fructose-bisphosphate aldolase C	ALDOC		1	9	3	3	7	8	8	9	8	7	8	9	9	7	8	7	3	3	2	3	3	3	3	3	3	3	3	3	3	3	2	3	3	3	3	3	3	3	3	3	2021-01-23	2021-05-11
Q71UI9;P0C0S5	Q71UI9;P0C0S5	6;6	4;4	4;4	Histone H2A.V;Histone H2A.Z	H2AFV;H2AFZ	;	2	6	4	4	6	6	6	6	6	6	6	6	6	6	6	6	4	4	4	4	4	4	4	4	4	4	4	4	4	4	4	4	4	4	4	4	4	4	4	4	53.9	46.9
P0DMV9;P0DMV8	P0DMV9;P0DMV8	18;18	15;15	10;10	Heat shock 70 kDa protein 1B;Heat shock 70 kDa protein 1A	HSPA1B;HSPA1A	;	2	18	15	10	16	16	16	15	16	16	17	17	17	15	17	15	13	13	13	12	13	13	14	14	14	12	14	12	10	8	8	8	9	8	9	9	9	7	9	7	36	2021-05-31
P0DN76;Q01081;Q8WU68	P0DN76;Q01081;Q8WU68	5;5;3	5;5;3	5;5;3	Splicing factor U2AF 35 kDa subunit;Splicing factor U2AF 26 kDa subunit	U2AF1;U2AF1L4	;;	3	5	5	5	4	5	4	4	2	3	3	4	5	4	3	3	4	5	4	4	2	3	3	4	5	4	3	3	4	5	4	4	2	3	3	4	5	4	3	3	2021-02-24	2021-02-24
P0DN79;P35520	P0DN79;P35520	2;2	2;2	2;2	Cystathionine beta-synthase	CBS	;	2	2	2	2	2	2	2	2	2	2	2	2	2	2	2	2	2	2	2	2	2	2	2	2	2	2	2	2	2	2	2	2	2	2	2	2	2	2	2	2	2021-08-07	2021-08-07
P0DP25;P0DP24;P0DP23;P27482;P02585	P0DP25;P0DP24;P0DP23	4;4;4;1;1	4;4;4;1;1	4;4;4;1;1			;;	5	4	4	4	2	3	2	4	2	3	2	3	2	3	4	3	2	3	2	4	2	3	2	3	2	3	4	3	2	3	2	4	2	3	2	3	2	3	4	3	2021-08-24	2021-08-24
P10153	P10153	2	2	2	Non-secretory ribonuclease	RNASE2		1	2	2	2	1	2	2	2	1	1	1	2	2	1	2	2	1	2	2	2	1	1	1	2	2	1	2	2	1	2	2	2	1	1	1	2	2	1	2	2	23	23
P10155	P10155	9	9	9	60 kDa SS-A/Ro ribonucleoprotein	TROVE2		1	9	9	9	7	6	5	5	7	7	7	7	7	8	8	5	7	6	5	5	7	7	7	7	7	8	8	5	7	6	5	5	7	7	7	7	7	8	8	5	2021-08-23	2021-08-23
P10253	P10253	17	17	17	Lysosomal alpha-glucosidase;76 kDa lysosomal alpha-glucosidase;70 kDa lysosomal alpha-glucosidase	GAA		1	17	17	17	13	14	15	15	16	15	12	14	13	13	15	12	13	14	15	15	16	15	12	14	13	13	15	12	13	14	15	15	16	15	12	14	13	13	15	12	2021-09-22	2021-09-22
P10301	P10301	2	2	2	Ras-related protein R-Ras	RRAS		1	2	2	2	1	2	1	2	1	2	1	2	1	2	2	1	1	2	1	2	1	2	1	2	1	2	2	1	1	2	1	2	1	2	1	2	1	2	2	1	2021-04-06	2021-04-06
P10412;P16403;Q02539;P22492	P10412;P16403	15;11;7;4	15;11;7;4	3;0;0;0	Histone H1.4;Histone H1.2	HIST1H1E;HIST1H1C	;	4	15	15	3	11	13	11	13	11	12	10	11	11	13	14	11	11	13	11	13	11	12	10	11	11	13	14	11	2	3	2	2	2	3	2	2	2	3	2	2	38.8	38.8
P10451;CON__P31096	P10451	5;1	5;1	5;1	Osteopontin	SPP1		2	5	5	5	5	3	3	4	4	5	4	5	5	3	3	3	5	3	3	4	4	5	4	5	5	3	3	3	5	3	3	4	4	5	4	5	5	3	3	3	2021-09-22	2021-09-22
P10515	P10515	9	9	9	Dihydrolipoyllysine-residue acetyltransferase component of pyruvate dehydrogenase complex, mitochondrial	DLAT		1	9	9	9	7	8	6	7	8	8	8	7	8	7	8	8	7	8	6	7	8	8	8	7	8	7	8	8	7	8	6	7	8	8	8	7	8	7	8	8	2021-06-21	2021-06-21
P10599	P10599	8	8	8	Thioredoxin	TXN		1	8	8	8	6	8	8	8	8	7	8	8	8	8	8	8	6	8	8	8	8	7	8	8	8	8	8	8	6	8	8	8	8	7	8	8	8	8	8	8	65.7	65.7
P10606	P10606	5	5	5	Cytochrome c oxidase subunit 5B, mitochondrial	COX5B		1	5	5	5	5	5	5	5	5	5	5	5	5	5	5	5	5	5	5	5	5	5	5	5	5	5	5	5	5	5	5	5	5	5	5	5	5	5	5	5	30.2	30.2
P10619	P10619	4	4	4	Lysosomal protective protein;Lysosomal protective protein 32 kDa chain;Lysosomal protective protein 20 kDa chain	CTSA		1	4	4	4	4	4	2	4	4	2	2	4	3	3	4	2	4	4	2	4	4	2	2	4	3	3	4	2	4	4	2	4	4	2	2	4	3	3	4	2	2021-01-13	2021-01-13
P10644	P10644	6	6	6	cAMP-dependent protein kinase type I-alpha regulatory subunit;cAMP-dependent protein kinase type I-alpha regulatory subunit, N-terminally processed	PRKAR1A		1	6	6	6	4	5	6	6	6	5	5	6	5	5	5	6	4	5	6	6	6	5	5	6	5	5	5	6	4	5	6	6	6	5	5	6	5	5	5	6	2021-05-21	2021-05-21
P10768	P10768	8	8	8	S-formylglutathione hydrolase	ESD		1	8	8	8	7	7	6	8	8	8	8	8	8	7	7	8	7	7	6	8	8	8	8	8	8	7	7	8	7	7	6	8	8	8	8	8	8	7	7	8	45.4	45.4
P10809	P10809	55	55	55	60 kDa heat shock protein, mitochondrial	HSPD1		1	55	55	55	51	53	48	51	50	48	49	51	51	50	51	50	51	53	48	51	50	48	49	51	51	50	51	50	51	53	48	51	50	48	49	51	51	50	51	50	79.9	79.9
P11021	P11021	39	38	38	78 kDa glucose-regulated protein	HSPA5		1	39	38	38	36	36	37	38	36	37	35	37	36	35	37	35	35	35	36	37	35	36	34	36	35	34	36	34	35	35	36	37	35	36	34	36	35	34	36	34	50.3	50.3
P11142;P54652	P11142	46;12	46;12	40;6	Heat shock cognate 71 kDa protein	HSPA8		2	46	46	40	39	42	40	40	41	44	39	43	43	44	45	42	39	42	40	40	41	44	39	43	43	44	45	42	33	37	34	35	36	38	33	37	38	38	40	36	66.9	66.9
P11166	P11166	5	5	5	Solute carrier family 2, facilitated glucose transporter member 1	SLC2A1		1	5	5	5	3	5	3	5	4	4	3	1	3	5	2	3	3	5	3	5	4	4	3	1	3	5	2	3	3	5	3	5	4	4	3	1	3	5	2	3	2021-09-07	2021-09-07
P11172	P11172	5	5	5	Uridine 5-monophosphate synthase;Orotate phosphoribosyltransferase;Orotidine 5-phosphate decarboxylase	UMPS		1	5	5	5	4	4	5	4	4	4	4	4	4	4	4	5	4	4	5	4	4	4	4	4	4	4	4	5	4	4	5	4	4	4	4	4	4	4	4	5	2021-04-14	2021-04-14
P11177	P11177	11	11	11	Pyruvate dehydrogenase E1 component subunit beta, mitochondrial	PDHB		1	11	11	11	7	9	9	10	9	9	9	10	11	10	10	9	7	9	9	10	9	9	9	10	11	10	10	9	7	9	9	10	9	9	9	10	11	10	10	9	43.5	43.5
P11182	P11182	5	5	5	Lipoamide acyltransferase component of branched-chain alpha-keto acid dehydrogenase complex, mitochondrial	DBT		1	5	5	5	4	4	3	4	3	4	3	3	4	4	4	3	4	4	3	4	3	4	3	3	4	4	4	3	4	4	3	4	3	4	3	3	4	4	4	3	2021-08-15	2021-08-15
P11215	P11215	21	21	20	Integrin alpha-M	ITGAM		1	21	21	20	17	21	18	18	17	19	13	20	18	20	19	20	17	21	18	18	17	19	13	20	18	20	19	20	16	20	17	17	16	18	12	19	17	19	18	19	2021-01-24	2021-01-24
P11216	P11216	13	9	9	Glycogen phosphorylase, brain form	PYGB		1	13	9	9	11	11	11	11	12	12	11	12	11	12	13	12	8	8	7	7	8	8	7	8	8	8	9	8	8	8	7	7	8	8	7	8	8	8	9	8	2021-06-16	2021-09-11
P11233	P11233	7	7	3	Ras-related protein Ral-A	RALA		1	7	7	3	5	5	5	6	6	5	5	4	4	5	6	4	5	5	5	6	6	5	5	4	4	5	6	4	3	3	3	3	3	3	3	1	3	3	3	2	38.3	38.3
P11234	P11234	7	3	3	Ras-related protein Ral-B	RALB		1	7	3	3	5	5	5	6	6	5	5	6	4	5	6	5	3	3	3	3	3	3	3	3	3	3	3	3	3	3	3	3	3	3	3	3	3	3	3	3	43.2	2021-09-19
P11279	P11279	6	6	6	Lysosome-associated membrane glycoprotein 1	LAMP1		1	6	6	6	5	6	5	6	5	5	5	6	6	5	5	5	5	6	5	6	5	5	5	6	6	5	5	5	5	6	5	6	5	5	5	6	6	5	5	5	12	12
P11310	P11310	22	22	22	Medium-chain specific acyl-CoA dehydrogenase, mitochondrial	ACADM		1	22	22	22	18	21	19	22	18	20	18	19	19	20	20	20	18	21	19	22	18	20	18	19	19	20	20	20	18	21	19	22	18	20	18	19	19	20	20	20	51.5	51.5
P11387;Q969P6	P11387	8;1	8;1	8;1	DNA topoisomerase 1	TOP1		2	8	8	8	7	7	7	6	8	6	7	7	7	7	7	7	7	7	7	6	8	6	7	7	7	7	7	7	7	7	7	6	8	6	7	7	7	7	7	7	2021-05-14	2021-05-14
P11413	P11413	16	16	16	Glucose-6-phosphate 1-dehydrogenase	G6PD		1	16	16	16	14	13	15	12	14	14	14	15	16	13	15	14	14	13	15	12	14	14	14	15	16	13	15	14	14	13	15	12	14	14	14	15	16	13	15	14	36.1	36.1
P11441	P11441	2	2	2	Ubiquitin-like protein 4A	UBL4A		1	2	2	2	1	2	2	2	1	2	1	2	2	2	2	1	1	2	2	2	1	2	1	2	2	2	2	1	1	2	2	2	1	2	1	2	2	2	2	1	2021-06-16	2021-06-16
P11498	P11498	3	3	3	Pyruvate carboxylase, mitochondrial	PC		1	3	3	3	1	1	3	2	2	2	2	1	2	1	1	1	1	1	3	2	2	2	2	1	2	1	1	1	1	1	3	2	2	2	2	1	2	1	1	1	2021-06-05	2021-06-05
P11586	P11586	29	29	29	C-1-tetrahydrofolate synthase, cytoplasmic;Methylenetetrahydrofolate dehydrogenase;Methenyltetrahydrofolate cyclohydrolase;Formyltetrahydrofolate synthetase;C-1-tetrahydrofolate synthase, cytoplasmic, N-terminally processed	MTHFD1		1	29	29	29	25	28	25	27	28	29	26	28	29	27	27	25	25	28	25	27	28	29	26	28	29	27	27	25	25	28	25	27	28	29	26	28	29	27	27	25	37.3	37.3
P11717	P11717	36	36	36	Cation-independent mannose-6-phosphate receptor	IGF2R		1	36	36	36	29	28	30	29	32	33	24	32	30	29	31	30	29	28	30	29	32	33	24	32	30	29	31	30	29	28	30	29	32	33	24	32	30	29	31	30	2021-07-21	2021-07-21
P11766	P11766	4	4	4	Alcohol dehydrogenase class-3	ADH5		1	4	4	4	4	4	3	4	4	4	3	4	4	4	4	4	4	4	3	4	4	4	3	4	4	4	4	4	4	4	3	4	4	4	3	4	4	4	4	4	2021-05-19	2021-05-19
P11908	P11908	8	4	4	Ribose-phosphate pyrophosphokinase 2	PRPS2		1	8	4	4	7	7	6	7	5	5	5	7	6	8	7	7	3	4	2	4	3	3	2	4	3	4	3	4	3	4	2	4	3	3	2	4	3	4	3	4	40.9	2021-07-26
P11940;Q9H361;Q4VXU2;Q96DU9	P11940;Q9H361	18;9;4;1	12;7;3;1	11;6;2;1	Polyadenylate-binding protein 1;Polyadenylate-binding protein 3	PABPC1;PABPC3	;	4	18	12	11	16	13	14	15	17	17	13	18	16	16	14	14	10	8	10	12	11	12	9	12	10	11	10	8	9	7	9	11	10	11	8	11	9	10	9	7	2021-03-28	2021-04-18
P12004	P12004	4	4	4	Proliferating cell nuclear antigen	PCNA		1	4	4	4	3	4	3	3	3	3	3	3	3	3	3	1	3	4	3	3	3	3	3	3	3	3	3	1	3	4	3	3	3	3	3	3	3	3	3	1	2021-05-19	2021-05-19
P12081	P12081	14	14	11	Histidine--tRNA ligase, cytoplasmic	HARS		1	14	14	11	8	11	9	11	12	13	11	11	14	9	11	11	8	11	9	11	12	13	11	11	14	9	11	11	7	10	6	9	9	10	8	9	11	7	8	9	40.7	40.7
P12109	P12109	5	5	5	Collagen alpha-1(VI) chain	COL6A1		1	5	5	5	4	3	4	2	5	5	5	4	4	3	2	3	4	3	4	2	5	5	5	4	4	3	2	3	4	3	4	2	5	5	5	4	4	3	2	3	2021-02-09	2021-02-09
P12236;P12235	P12236;P12235	19;12	9;5	9;5	ADP/ATP translocase 3;ADP/ATP translocase 3, N-terminally processed;ADP/ATP translocase 1	SLC25A6;SLC25A4	;	2	19	9	9	15	17	14	17	13	18	16	16	12	17	19	17	7	7	5	7	5	8	6	6	3	8	9	8	7	7	5	7	5	8	6	6	3	8	9	8	56	2021-09-30
P12268	P12268	9	9	8	Inosine-5-monophosphate dehydrogenase 2	IMPDH2		1	9	9	8	7	8	7	8	7	7	7	7	7	7	7	9	7	8	7	8	7	7	7	7	7	7	7	9	6	7	6	7	6	6	6	6	6	6	6	8	2021-09-18	2021-09-18
P12270	P12270	29	29	29	Nucleoprotein TPR	TPR		1	29	29	29	21	23	22	24	24	26	18	22	17	22	21	25	21	23	22	24	24	26	18	22	17	22	21	25	21	23	22	24	24	26	18	22	17	22	21	25	2021-04-17	2021-04-17
P12277	P12277	4	4	4	Creatine kinase B-type	CKB		1	4	4	4	4	4	2	3	4	4	3	4	4	3	4	4	4	4	2	3	4	4	3	4	4	3	4	4	4	4	2	3	4	4	3	4	4	3	4	4	26	26
P12814;P35609;Q08043	P12814	51;12;10	32;2;1	32;2;1	Alpha-actinin-1	ACTN1		3	51	32	32	36	45	37	44	40	43	36	42	45	45	50	41	22	28	22	27	26	26	22	25	27	28	32	24	22	28	22	27	26	26	22	25	27	28	32	24	60.8	42.2
P12955	P12955	6	6	6	Xaa-Pro dipeptidase	PEPD		1	6	6	6	4	6	5	4	4	4	3	6	4	5	5	5	4	6	5	4	4	4	3	6	4	5	5	5	4	6	5	4	4	4	3	6	4	5	5	5	2021-01-20	2021-01-20
P12956	P12956	35	35	35	X-ray repair cross-complementing protein 6	XRCC6		1	35	35	35	31	35	31	33	31	32	28	33	31	32	33	33	31	35	31	33	31	32	28	33	31	32	33	33	31	35	31	33	31	32	28	33	31	32	33	33	50.7	50.7
P13010	P13010	30	30	30	X-ray repair cross-complementing protein 5	XRCC5		1	30	30	30	22	27	24	27	26	24	24	25	23	27	29	24	22	27	24	27	26	24	24	25	23	27	29	24	22	27	24	27	26	24	24	25	23	27	29	24	48.5	48.5
P13073	P13073	4	4	4	Cytochrome c oxidase subunit 4 isoform 1, mitochondrial	COX4I1		1	4	4	4	4	4	4	4	4	4	3	4	4	4	4	4	4	4	4	4	4	4	3	4	4	4	4	4	4	4	4	4	4	4	3	4	4	4	4	4	2021-03-24	2021-03-24
P13164;Q01629;Q01628	P13164;Q01629;Q01628	1;1;1	1;1;1	1;1;1	Interferon-induced transmembrane protein 1;Interferon-induced transmembrane protein 2;Interferon-induced transmembrane protein 3	IFITM1;IFITM2;IFITM3	;;	3	1	1	1	1	1	1	1	1	1	1	1	1	1	1	1	1	1	1	1	1	1	1	1	1	1	1	1	1	1	1	1	1	1	1	1	1	1	1	1	2021-08-12	2021-08-12
P13284	P13284	6	6	6	Gamma-interferon-inducible lysosomal thiol reductase	IFI30		1	6	6	6	5	4	5	5	5	6	5	6	6	5	6	4	5	4	5	5	5	6	5	6	6	5	6	4	5	4	5	5	5	6	5	6	6	5	6	4	40.4	40.4
P13473	P13473	2	2	2	Lysosome-associated membrane glycoprotein 2	LAMP2		1	2	2	2	2	2	2	2	2	2	2	2	2	2	2	2	2	2	2	2	2	2	2	2	2	2	2	2	2	2	2	2	2	2	2	2	2	2	2	2	2021-09-04	2021-09-04
P13489	P13489	33	33	33	Ribonuclease inhibitor	RNH1		1	33	33	33	29	32	25	32	32	31	30	31	32	33	32	29	29	32	25	32	32	31	30	31	32	33	32	29	29	32	25	32	32	31	30	31	32	33	32	29	85.9	85.9
P13498	P13498	3	3	3	Cytochrome b-245 light chain	CYBA		1	3	3	3	3	2	3	3	3	3	3	3	3	3	3	3	3	2	3	3	3	3	3	3	3	3	3	3	3	2	3	3	3	3	3	3	3	3	3	3	2021-07-28	2021-07-28
P13591	P13591	4	4	4	Neural cell adhesion molecule 1	NCAM1		1	4	4	4	4	2	3	1	4	3	2	4	2	3	3	3	4	2	3	1	4	3	2	4	2	3	3	3	4	2	3	1	4	3	2	4	2	3	3	3	2021-01-07	2021-01-07
P13612	P13612	3	3	3	Integrin alpha-4	ITGA4		1	3	3	3	3	2	3	2	2	3	3	2	2	2	3	2	3	2	3	2	2	3	3	2	2	2	3	2	3	2	3	2	2	3	3	2	2	2	3	2	2021-09-03	2021-09-03
P13639	P13639	48	48	47	Elongation factor 2	EEF2		1	48	48	47	41	44	42	44	44	46	44	44	44	47	47	45	41	44	42	44	44	46	44	44	44	47	47	45	40	43	41	43	43	45	43	43	43	46	46	44	61.9	61.9
P13667	P13667	30	30	30	Protein disulfide-isomerase A4	PDIA4		1	30	30	30	24	26	26	26	29	29	24	30	28	28	24	27	24	26	26	26	29	29	24	30	28	28	24	27	24	26	26	26	29	29	24	30	28	28	24	27	41.4	41.4
P13674	P13674	9	9	9	Prolyl 4-hydroxylase subunit alpha-1	P4HA1		1	9	9	9	7	6	9	8	9	9	7	9	8	9	8	8	7	6	9	8	9	9	7	9	8	9	8	8	7	6	9	8	9	9	7	9	8	9	8	8	2021-07-19	2021-07-19
P13693;Q9HAU6	P13693	6;1	6;1	6;1	Translationally-controlled tumor protein	TPT1		2	6	6	6	6	6	5	5	6	6	5	5	5	5	6	5	6	6	5	5	6	6	5	5	5	5	6	5	6	6	5	5	6	6	5	5	5	5	6	5	2021-07-29	2021-07-29
P13716	P13716	1	1	1	Delta-aminolevulinic acid dehydratase	ALAD		1	1	1	1	1	1	0	1	1	0	0	0	1	1	1	0	1	1	0	1	1	0	0	0	1	1	1	0	1	1	0	1	1	0	0	0	1	1	1	0	2021-02-05	2021-02-05
P13796;Q14651	P13796	46;2	46;2	39;1	Plastin-2	LCP1		2	46	46	39	39	42	34	43	39	41	39	46	39	42	44	38	39	42	34	43	39	41	39	46	39	42	44	38	33	35	28	36	33	35	32	39	33	35	37	32	71	71
P13797	P13797	10	3	3	Plastin-3	PLS3		1	10	3	3	9	10	8	10	9	9	10	10	9	10	10	9	3	3	2	3	3	3	3	3	3	3	3	3	3	3	2	3	3	3	3	3	3	3	3	3	2021-07-16	9
P13798	P13798	10	10	10	Acylamino-acid-releasing enzyme	APEH		1	10	10	10	5	4	7	9	7	5	6	6	5	8	7	6	5	4	7	9	7	5	6	6	5	8	7	6	5	4	7	9	7	5	6	6	5	8	7	6	2021-09-17	2021-09-17
P13804	P13804	17	17	17	Electron transfer flavoprotein subunit alpha, mitochondrial	ETFA		1	17	17	17	16	17	15	15	15	16	14	17	15	16	17	17	16	17	15	15	15	16	14	17	15	16	17	17	16	17	15	15	15	16	14	17	15	16	17	17	63.7	63.7
P13807	P13807	3	3	3	Glycogen [starch] synthase, muscle	GYS1		1	3	3	3	2	1	2	3	3	3	2	3	3	3	3	3	2	1	2	3	3	3	2	3	3	3	3	3	2	1	2	3	3	3	2	3	3	3	3	3	2021-01-08	2021-01-08
P13861;P31323	P13861	12;1	12;1	12;1	cAMP-dependent protein kinase type II-alpha regulatory subunit	PRKAR2A		2	12	12	12	10	9	10	11	11	11	11	12	11	11	11	11	10	9	10	11	11	11	11	12	11	11	11	11	10	9	10	11	11	11	11	12	11	11	11	11	39.9	39.9
P13995	P13995	3	3	3	Bifunctional methylenetetrahydrofolate dehydrogenase/cyclohydrolase, mitochondrial;NAD-dependent methylenetetrahydrofolate dehydrogenase;Methenyltetrahydrofolate cyclohydrolase	MTHFD2		1	3	3	3	2	2	2	1	2	3	2	2	1	2	2	1	2	2	2	1	2	3	2	2	1	2	2	1	2	2	2	1	2	3	2	2	1	2	2	1	2021-06-12	2021-06-12
P14174	P14174	2	2	2	Macrophage migration inhibitory factor	MIF		1	2	2	2	2	2	2	2	2	2	2	2	2	2	2	2	2	2	2	2	2	2	2	2	2	2	2	2	2	2	2	2	2	2	2	2	2	2	2	2	2021-04-17	2021-04-17
P14314	P14314	13	13	13	Glucosidase 2 subunit beta	PRKCSH		1	13	13	13	11	10	13	12	12	10	9	13	13	11	11	11	11	10	13	12	12	10	9	13	13	11	11	11	11	10	13	12	12	10	9	13	13	11	11	11	2021-04-24	2021-04-24
P14317	P14317	21	21	21	Hematopoietic lineage cell-specific protein	HCLS1		1	21	21	21	15	16	17	20	18	18	12	20	18	18	19	17	15	16	17	20	18	18	12	20	18	18	19	17	15	16	17	20	18	18	12	20	18	18	19	17	44.7	44.7
P14324	P14324	4	4	4	Farnesyl pyrophosphate synthase	FDPS		1	4	4	4	3	4	3	4	3	3	3	3	3	4	4	3	3	4	3	4	3	3	3	3	3	4	4	3	3	4	3	4	3	3	3	3	3	4	4	3	2021-02-11	2021-02-11
P14384	P14384	3	3	3	Carboxypeptidase M	CPM		1	3	3	3	1	1	1	2	3	2	1	3	3	2	1	2	1	1	1	2	3	2	1	3	3	2	1	2	1	1	1	2	3	2	1	3	3	2	1	2	2021-06-12	2021-06-12
P14406	P14406	3	3	3	Cytochrome c oxidase subunit 7A2, mitochondrial	COX7A2		1	3	3	3	3	3	3	3	3	3	3	3	3	3	3	3	3	3	3	3	3	3	3	3	3	3	3	3	3	3	3	3	3	3	3	3	3	3	3	3	2021-01-30	2021-01-30
P14550	P14550	16	16	16	Alcohol dehydrogenase [NADP(+)]	AKR1A1		1	16	16	16	14	13	13	13	15	13	12	13	11	14	15	13	14	13	13	13	15	13	12	13	11	14	15	13	14	13	13	13	15	13	12	13	11	14	15	13	74.2	74.2
P14618;P30613	P14618	49;2	49;2	49;2	Pyruvate kinase PKM	PKM		2	49	49	49	43	43	42	42	41	43	45	47	47	45	44	43	43	43	42	42	41	43	45	47	47	45	44	43	43	43	42	42	41	43	45	47	47	45	44	43	86.8	86.8
P14625;Q58FF3	P14625	53;4	51;4	51;4	Endoplasmin	HSP90B1		2	53	51	51	43	48	47	46	48	49	47	51	44	48	51	47	41	47	45	45	46	47	45	49	42	46	49	45	41	47	45	45	46	47	45	49	42	46	49	45	58.9	57.2
P14635	P14635	1	1	1	G2/mitotic-specific cyclin-B1	CCNB1		1	1	1	1	0	1	1	1	0	0	0	1	1	1	1	1	0	1	1	1	0	0	0	1	1	1	1	1	0	1	1	1	0	0	0	1	1	1	1	1	2021-09-03	2021-09-03
P14649	P14649	3	1	1	Myosin light chain 6B	MYL6B		1	3	1	1	2	2	3	2	2	3	2	2	2	2	2	2	0	0	1	0	0	1	0	0	0	0	0	0	0	0	1	0	0	1	0	0	0	0	0	0	2021-02-19	2021-07-07
P63162;P14678	P63162;P14678	3;3	3;3	3;3	Small nuclear ribonucleoprotein-associated protein N;Small nuclear ribonucleoprotein-associated proteins B and B	SNRPN;SNRPB	;	2	3	3	3	3	3	3	3	3	3	3	3	3	3	3	3	3	3	3	3	3	3	3	3	3	3	3	3	3	3	3	3	3	3	3	3	3	3	3	3	2021-08-13	2021-08-13
P14780	P14780	2	2	2	Matrix metalloproteinase-9;67 kDa matrix metalloproteinase-9;82 kDa matrix metalloproteinase-9	MMP9		1	2	2	2	0	0	0	0	2	2	1	2	2	0	1	0	0	0	0	0	2	2	1	2	2	0	1	0	0	0	0	0	2	2	1	2	2	0	1	0	2021-04-04	2021-04-04
P14854	P14854	5	5	5	Cytochrome c oxidase subunit 6B1	COX6B1		1	5	5	5	5	4	5	4	4	5	5	4	4	5	4	4	5	4	5	4	4	5	5	4	4	5	4	4	5	4	5	4	4	5	5	4	4	5	4	4	75.6	75.6
P14866	P14866	22	22	21	Heterogeneous nuclear ribonucleoprotein L	HNRNPL		1	22	22	21	17	20	18	19	19	18	14	21	18	21	21	19	17	20	18	19	19	18	14	21	18	21	21	19	17	20	18	19	19	18	14	20	18	21	21	19	53.3	53.3
P14868	P14868	10	10	10	Aspartate--tRNA ligase, cytoplasmic	DARS		1	10	10	10	8	6	8	8	8	7	6	6	8	9	8	9	8	6	8	8	8	7	6	6	8	9	8	9	8	6	8	8	8	7	6	6	8	9	8	9	2021-09-26	2021-09-26
P14927	P14927	9	9	9	Cytochrome b-c1 complex subunit 7	UQCRB		1	9	9	9	7	8	5	7	5	9	5	7	8	6	7	7	7	8	5	7	5	9	5	7	8	6	7	7	7	8	5	7	5	9	5	7	8	6	7	7	68.5	68.5
P15090;P02689	P15090	4;1	4;1	4;1	Fatty acid-binding protein, adipocyte	FABP4		2	4	4	4	3	4	4	4	3	3	3	2	3	3	4	4	3	4	4	4	3	3	3	2	3	3	4	4	3	4	4	4	3	3	3	2	3	3	4	4	2021-07-22	2021-07-22
P15121	P15121	2	2	2	Aldose reductase	AKR1B1		1	2	2	2	2	2	1	2	2	2	2	2	2	2	2	2	2	2	1	2	2	2	2	2	2	2	2	2	2	2	1	2	2	2	2	2	2	2	2	2	2021-04-10	2021-04-10
P15144	P15144	32	32	32	Aminopeptidase N	ANPEP		1	32	32	32	23	28	29	28	28	28	27	30	29	27	28	27	23	28	29	28	28	28	27	30	29	27	28	27	23	28	29	28	28	28	27	30	29	27	28	27	35.2	35.2
P15151	P15151	2	2	2	Poliovirus receptor	PVR		1	2	2	2	0	0	0	2	2	1	1	1	0	1	1	1	0	0	0	2	2	1	1	1	0	1	1	1	0	0	0	2	2	1	1	1	0	1	1	1	2021-08-05	2021-08-05
P15153;P17081;Q9H4E5	P15153	11;1;1	10;0;0	6;0;0	Ras-related C3 botulinum toxin substrate 2	RAC2		3	11	10	6	8	9	8	9	9	10	10	10	10	9	11	10	8	8	7	8	9	9	9	9	9	8	10	9	5	5	5	5	5	5	5	6	6	5	6	6	60.4	54.7
P15170;Q8IYD1	P15170	9;4	9;4	9;4	Eukaryotic peptide chain release factor GTP-binding subunit ERF3A	GSPT1		2	9	9	9	8	8	9	8	9	9	8	8	9	9	8	9	8	8	9	8	9	9	8	8	9	9	8	9	8	8	9	8	9	9	8	8	9	9	8	9	2021-05-26	2021-05-26
P15289	P15289	6	6	6	Arylsulfatase A;Arylsulfatase A component B;Arylsulfatase A component C	ARSA		1	6	6	6	2	5	5	4	3	3	3	3	3	3	4	3	2	5	5	4	3	3	3	3	3	3	4	3	2	5	5	4	3	3	3	3	3	3	4	3	2021-07-19	2021-07-19
P15309	P15309	6	6	6	Prostatic acid phosphatase;PAPf39	ACPP		1	6	6	6	2	5	4	5	5	5	4	5	6	6	6	4	2	5	4	5	5	5	4	5	6	6	6	4	2	5	4	5	5	5	4	5	6	6	6	4	2021-09-17	2021-09-17
P15311	P15311	30	20	19	Ezrin	EZR		1	30	20	19	24	26	23	29	24	28	22	26	24	27	26	29	15	16	15	19	14	18	12	16	15	17	16	19	15	15	14	18	14	18	12	15	15	16	15	18	52.4	38.4
P15374	P15374	1	1	1	Ubiquitin carboxyl-terminal hydrolase isozyme L3	UCHL3		1	1	1	1	1	1	1	1	1	1	0	1	1	1	1	1	1	1	1	1	1	1	0	1	1	1	1	1	1	1	1	1	1	1	0	1	1	1	1	1	2021-09-03	2021-09-03
P15498	P15498	6	6	6	Proto-oncogene vav	VAV1		1	6	6	6	2	4	4	4	4	3	4	4	5	4	3	4	2	4	4	4	4	3	4	4	5	4	3	4	2	4	4	4	4	3	4	4	5	4	3	4	2021-02-10	2021-02-10
P15531	P15531	6	2	2	Nucleoside diphosphate kinase A	NME1		1	6	2	2	5	5	4	5	5	4	5	5	4	4	6	4	2	2	1	2	2	1	1	1	1	1	2	1	2	2	1	2	2	1	1	1	1	1	2	1	52	2021-07-21
P15559	P15559	6	6	6	NAD(P)H dehydrogenase [quinone] 1	NQO1		1	6	6	6	6	6	5	6	6	6	6	6	5	6	6	6	6	6	5	6	6	6	6	6	5	6	6	6	6	6	5	6	6	6	6	6	5	6	6	6	2021-02-18	2021-02-18
P15586	P15586	12	12	12	N-acetylglucosamine-6-sulfatase	GNS		1	12	12	12	12	12	9	11	12	12	11	12	12	11	12	10	12	12	9	11	12	12	11	12	12	11	12	10	12	12	9	11	12	12	11	12	12	11	12	10	31.9	31.9
P15848	P15848	8	8	8	Arylsulfatase B	ARSB		1	8	8	8	7	6	6	5	7	7	6	7	7	7	5	6	7	6	6	5	7	7	6	7	7	7	5	6	7	6	6	5	7	7	6	7	7	7	5	6	2021-01-22	2021-01-22
P15880	P15880	8	8	8	40S ribosomal protein S2	RPS2		1	8	8	8	6	6	5	6	6	5	6	6	6	7	8	5	6	6	5	6	6	5	6	6	6	7	8	5	6	6	5	6	6	5	6	6	6	7	8	5	2021-07-30	2021-07-30
P15927	P15927	3	3	3	Replication protein A 32 kDa subunit	RPA2		1	3	3	3	1	3	0	2	2	3	3	3	3	3	2	3	1	3	0	2	2	3	3	3	3	3	2	3	1	3	0	2	2	3	3	3	3	3	2	3	2021-01-21	2021-01-21
P16070	P16070	7	7	7	CD44 antigen	CD44		1	7	7	7	6	4	5	6	6	7	4	7	7	6	6	5	6	4	5	6	6	7	4	7	7	6	6	5	6	4	5	6	6	7	4	7	7	6	6	5	2021-07-09	2021-07-09
P16104	P16104	6	2	2	Histone H2AX	H2AFX		1	6	2	2	5	6	6	6	6	6	5	6	6	6	5	6	1	2	2	2	2	2	1	2	2	2	1	2	1	2	2	2	2	2	1	2	2	2	1	2	42.7	2021-03-06
P16150	P16150	2	2	2	Leukosialin	SPN		1	2	2	2	1	2	2	2	2	2	1	2	2	2	2	2	1	2	2	2	2	2	1	2	2	2	2	2	1	2	2	2	2	2	1	2	2	2	2	2	2021-05-11	2021-05-11
P16152	P16152	11	11	9	Carbonyl reductase [NADPH] 1	CBR1		1	11	11	9	7	8	11	10	9	10	9	9	11	9	9	9	7	8	11	10	9	10	9	9	11	9	9	9	5	6	9	8	7	8	7	7	9	7	7	7	52.3	52.3
P16219	P16219	2	2	2	Short-chain specific acyl-CoA dehydrogenase, mitochondrial	ACADS		1	2	2	2	1	2	2	2	2	2	2	2	2	1	2	2	1	2	2	2	2	2	2	2	2	1	2	2	1	2	2	2	2	2	2	2	2	1	2	2	2021-09-04	2021-09-04
P16278	P16278	3	3	3	Beta-galactosidase	GLB1		1	3	3	3	3	3	3	3	3	3	3	2	3	3	3	3	3	3	3	3	3	3	3	2	3	3	3	3	3	3	3	3	3	3	3	2	3	3	3	3	2021-09-05	2021-09-05
P16284	P16284	20	20	20	Platelet endothelial cell adhesion molecule	PECAM1		1	20	20	20	14	15	12	15	15	15	10	11	10	14	15	13	14	15	12	15	15	15	10	11	10	14	15	13	14	15	12	15	15	15	10	11	10	14	15	13	34.1	34.1
P16401	P16401	14	10	10	Histone H1.5	HIST1H1B		1	14	10	10	12	13	14	13	13	14	12	13	13	12	14	13	9	10	10	9	9	10	9	10	10	9	10	9	9	10	10	9	9	10	9	10	10	9	10	9	37.2	2021-01-26
P16402	P16402	15	3	3	Histone H1.3	HIST1H1D		1	15	3	3	10	13	11	14	11	11	9	11	12	13	14	12	1	3	2	3	2	2	1	2	3	3	2	3	1	3	2	3	2	2	1	2	3	3	2	3	38.5	2021-05-09
P16435	P16435	15	15	15	NADPH--cytochrome P450 reductase	POR		1	15	15	15	12	10	10	11	14	15	12	14	11	12	12	12	12	10	10	11	14	15	12	14	11	12	12	12	12	10	10	11	14	15	12	14	11	12	12	12	2021-08-31	2021-08-31
P16615;O14983;Q93084	P16615	33;6;5	33;6;5	33;6;5	Sarcoplasmic/endoplasmic reticulum calcium ATPase 2	ATP2A2		3	33	33	33	22	24	23	29	27	30	25	26	27	28	27	26	22	24	23	29	27	30	25	26	27	28	27	26	22	24	23	29	27	30	25	26	27	28	27	26	36	36
P16671	P16671	4	4	4	Platelet glycoprotein 4	CD36		1	4	4	4	3	2	3	2	3	4	2	4	4	3	2	2	3	2	3	2	3	4	2	4	4	3	2	2	3	2	3	2	3	4	2	4	4	3	2	2	2021-03-09	2021-03-09
P16885	P16885	3	3	3	1-phosphatidylinositol 4,5-bisphosphate phosphodiesterase gamma-2	PLCG2		1	3	3	3	2	2	1	3	2	2	1	2	3	3	1	2	2	2	1	3	2	2	1	2	3	3	1	2	2	2	1	3	2	2	1	2	3	3	1	2	2021-08-03	2021-08-03
P16930	P16930	8	8	8	Fumarylacetoacetase	FAH		1	8	8	8	6	8	6	7	7	6	5	6	6	6	6	5	6	8	6	7	7	6	5	6	6	6	6	5	6	8	6	7	7	6	5	6	6	6	6	5	2021-02-27	2021-02-27
P16949	P16949	8	8	5	Stathmin	STMN1		1	8	8	5	6	8	7	7	8	7	6	7	8	7	8	7	6	8	7	7	8	7	6	7	8	7	8	7	3	5	5	5	5	5	4	5	5	5	5	4	49.7	49.7
P17050	P17050	8	8	8	Alpha-N-acetylgalactosaminidase	NAGA		1	8	8	8	7	7	5	6	6	7	5	7	7	7	8	6	7	7	5	6	6	7	5	7	7	7	8	6	7	7	5	6	6	7	5	7	7	7	8	6	2021-08-25	2021-08-25
P17066;P48741	P17066;P48741	8;4	1;1	1;1	Heat shock 70 kDa protein 6;Putative heat shock 70 kDa protein 7	HSPA6;HSPA7	;	2	8	1	1	7	7	8	7	7	8	8	8	7	8	7	8	1	1	1	1	1	1	1	1	1	1	1	1	1	1	1	1	1	1	1	1	1	1	1	1	2021-04-13	2021-07-01
P17096	P17096	5	5	5	High mobility group protein HMG-I/HMG-Y	HMGA1		1	5	5	5	3	4	4	4	3	3	2	3	3	4	4	4	3	4	4	4	3	3	2	3	3	4	4	4	3	4	4	4	3	3	2	3	3	4	4	4	56.1	56.1
P17152	P17152	1	1	1	Transmembrane protein 11, mitochondrial	TMEM11		1	1	1	1	1	1	1	1	1	1	1	1	1	1	1	1	1	1	1	1	1	1	1	1	1	1	1	1	1	1	1	1	1	1	1	1	1	1	1	1	2021-03-08	2021-03-08
P17174	P17174	6	6	6	Aspartate aminotransferase, cytoplasmic	GOT1		1	6	6	6	6	4	3	5	5	4	5	3	4	4	5	3	6	4	3	5	5	4	5	3	4	4	5	3	6	4	3	5	5	4	5	3	4	4	5	3	2021-07-23	2021-07-23
P17480	P17480	1	1	1	Nucleolar transcription factor 1	UBTF		1	1	1	1	0	0	0	0	0	0	0	0	0	1	0	0	0	0	0	0	0	0	0	0	0	1	0	0	0	0	0	0	0	0	0	0	0	1	0	0	2021-06-01	2021-06-01
P17655	P17655	10	10	10	Calpain-2 catalytic subunit	CAPN2		1	10	10	10	6	8	7	10	7	9	5	9	8	9	10	8	6	8	7	10	7	9	5	9	8	9	10	8	6	8	7	10	7	9	5	9	8	9	10	8	2021-07-25	2021-07-25
P17812	P17812	21	21	19	CTP synthase 1	CTPS1		1	21	21	19	18	18	16	18	17	17	14	17	18	19	18	18	18	18	16	18	17	17	14	17	18	19	18	18	16	16	14	16	15	15	12	15	16	17	16	16	46.7	46.7
P17813	P17813	5	5	5	Endoglin	ENG		1	5	5	5	3	4	3	4	5	5	4	4	3	5	3	2	3	4	3	4	5	5	4	4	3	5	3	2	3	4	3	4	5	5	4	4	3	5	3	2	2021-06-11	2021-06-11
P17844	P17844	29	20	20	Probable ATP-dependent RNA helicase DDX5	DDX5		1	29	20	20	24	26	24	26	27	27	23	25	25	28	27	24	16	17	16	18	19	19	15	17	17	19	18	16	16	17	16	18	19	19	15	17	17	19	18	16	52	42.7
P17858	P17858	15	13	13	ATP-dependent 6-phosphofructokinase, liver type	PFKL		1	15	13	13	10	14	12	13	11	13	9	15	12	13	14	13	10	12	10	11	10	11	9	13	10	11	12	11	10	12	10	11	10	11	9	13	10	11	12	11	2021-06-28	25
P17900	P17900	7	7	7	Ganglioside GM2 activator;Ganglioside GM2 activator isoform short	GM2A		1	7	7	7	6	7	6	7	6	6	5	7	5	6	6	5	6	7	6	7	6	6	5	7	5	6	6	5	6	7	6	7	6	6	5	7	5	6	6	5	33.7	33.7
P17931	P17931	4	4	4	Galectin-3	LGALS3		1	4	4	4	4	4	4	4	4	4	4	4	4	4	4	4	4	4	4	4	4	4	4	4	4	4	4	4	4	4	4	4	4	4	4	4	4	4	4	4	2021-04-20	2021-04-20
P17980	P17980	15	15	15	26S protease regulatory subunit 6A	PSMC3		1	15	15	15	10	12	12	13	12	13	12	12	14	12	13	12	10	12	12	13	12	13	12	12	14	12	13	12	10	12	12	13	12	13	12	12	14	12	13	12	45.6	45.6
P17987	P17987	28	28	28	T-complex protein 1 subunit alpha	TCP1		1	28	28	28	23	23	22	25	23	22	24	26	24	23	27	22	23	23	22	25	23	22	24	26	24	23	27	22	23	23	22	25	23	22	24	26	24	23	27	22	61.7	61.7
P18031	P18031	2	2	2	Tyrosine-protein phosphatase non-receptor type 1	PTPN1		1	2	2	2	2	1	1	1	2	2	2	1	1	1	1	1	2	1	1	1	2	2	2	1	1	1	1	1	2	1	1	1	2	2	2	1	1	1	1	1	2021-01-05	2021-01-05
P18084	P18084	6	6	6	Integrin beta-5	ITGB5		1	6	6	6	4	5	4	3	4	4	3	4	4	5	5	4	4	5	4	3	4	4	3	4	4	5	5	4	4	5	4	3	4	4	3	4	4	5	5	4	2021-05-12	2021-05-12
P18085	P18085	5	1	1	ADP-ribosylation factor 4	ARF4		1	5	1	1	4	3	2	5	4	4	4	5	5	5	5	3	1	1	1	1	1	1	1	1	1	1	1	1	1	1	1	1	1	1	1	1	1	1	1	1	35.6	2021-06-05
P18124	P18124	14	14	14	60S ribosomal protein L7	RPL7		1	14	14	14	12	14	13	13	13	14	12	13	14	14	13	14	12	14	13	13	13	14	12	13	14	14	13	14	12	14	13	13	13	14	12	13	14	14	13	14	41.5	41.5
P18206	P18206	21	21	21	Vinculin	VCL		1	21	21	21	16	17	14	19	17	16	19	16	16	19	19	16	16	17	14	19	17	16	19	16	16	19	19	16	16	17	14	19	17	16	19	16	16	19	19	16	2021-02-27	2021-02-27
P18440	P18440	1	1	1	Arylamine N-acetyltransferase 1	NAT1		1	1	1	1	1	1	1	1	1	1	1	1	1	1	1	1	1	1	1	1	1	1	1	1	1	1	1	1	1	1	1	1	1	1	1	1	1	1	1	1	2021-09-05	2021-09-05
P18583	P18583	5	5	5	Protein SON	SON		1	5	5	5	4	4	5	5	4	3	1	4	3	3	5	4	4	4	5	5	4	3	1	4	3	3	5	4	4	4	5	5	4	3	1	4	3	3	5	4	2021-02-04	2021-02-04
P18621	P18621	12	12	12	60S ribosomal protein L17	RPL17		1	12	12	12	11	11	11	12	11	12	10	12	11	12	11	11	11	11	11	12	11	12	10	12	11	12	11	11	11	11	11	12	11	12	10	12	11	12	11	11	54.3	54.3
P18669;P15259;Q8N0Y7	P18669	20;7;7	20;7;7	20;7;7	Phosphoglycerate mutase 1	PGAM1		3	20	20	20	16	18	17	19	17	17	19	18	17	18	20	17	16	18	17	19	17	17	19	18	17	18	20	17	16	18	17	19	17	17	19	18	17	18	20	17	78	78
P18754	P18754	9	9	9	Regulator of chromosome condensation	RCC1		1	9	9	9	6	8	7	6	6	6	2	6	6	7	6	5	6	8	7	6	6	6	2	6	6	7	6	5	6	8	7	6	6	6	2	6	6	7	6	5	38	38
P18859	P18859	3	3	3	ATP synthase-coupling factor 6, mitochondrial	ATP5J		1	3	3	3	3	3	3	3	3	3	3	3	3	3	3	3	3	3	3	3	3	3	3	3	3	3	3	3	3	3	3	3	3	3	3	3	3	3	3	3	35.2	35.2
P19338	P19338	33	33	33	Nucleolin	NCL		1	33	33	33	29	30	28	30	29	31	30	31	27	30	30	29	29	30	28	30	29	31	30	31	27	30	30	29	29	30	28	30	29	31	30	31	27	30	30	29	41.1	41.1
P19367;Q2TB90	P19367	20;2	20;2	20;2	Hexokinase-1	HK1		2	20	20	20	15	17	15	15	16	15	16	17	16	15	17	13	15	17	15	15	16	15	16	17	16	15	17	13	15	17	15	15	16	15	16	17	16	15	17	13	2021-08-26	2021-08-26
P19387	P19387	3	3	3	DNA-directed RNA polymerase II subunit RPB3	POLR2C		1	3	3	3	2	3	3	3	2	2	3	3	3	3	3	3	2	3	3	3	2	2	3	3	3	3	3	3	2	3	3	3	2	2	3	3	3	3	3	3	2021-05-17	2021-05-17
P19388	P19388	1	1	1	DNA-directed RNA polymerases I, II, and III subunit RPABC1	POLR2E		1	1	1	1	0	0	1	1	1	1	0	1	1	1	1	1	0	0	1	1	1	1	0	1	1	1	1	1	0	0	1	1	1	1	0	1	1	1	1	1	2021-07-06	2021-07-06
P19404	P19404	5	5	5	NADH dehydrogenase [ubiquinone] flavoprotein 2, mitochondrial	NDUFV2		1	5	5	5	3	4	4	3	4	4	4	4	4	5	5	3	3	4	4	3	4	4	4	4	4	5	5	3	3	4	4	3	4	4	4	4	4	5	5	3	2021-03-27	2021-03-27
P19440;A6NGU5;P36268;Q14390;B5MD39	P19440;A6NGU5;P36268	6;5;3;2;2	6;5;3;2;2	6;5;3;2;2	Gamma-glutamyltranspeptidase 1;Gamma-glutamyltranspeptidase 1 heavy chain;Gamma-glutamyltranspeptidase 1 light chain;Putative gamma-glutamyltranspeptidase 3;Putative gamma-glutamyltranspeptidase 3 heavy chain;Putative gamma-glutamyltranspeptidase 3 light chain;Inactive gamma-glutamyltranspeptidase 2	GGT1;GGT3P;GGT2	;;	5	6	6	6	2	6	6	6	4	2	1	4	6	4	3	6	2	6	6	6	4	2	1	4	6	4	3	6	2	6	6	6	4	2	1	4	6	4	3	6	2021-07-12	2021-07-12
P19474	P19474	5	5	5	E3 ubiquitin-protein ligase TRIM21	TRIM21		1	5	5	5	4	5	4	4	4	5	4	5	4	4	4	4	4	5	4	4	4	5	4	5	4	4	4	4	4	5	4	4	4	5	4	5	4	4	4	4	2021-04-15	2021-04-15
P19525	P19525	8	8	8	Interferon-induced, double-stranded RNA-activated protein kinase	EIF2AK2		1	8	8	8	5	5	5	7	7	7	5	8	6	5	6	5	5	5	5	7	7	7	5	8	6	5	6	5	5	5	5	7	7	7	5	8	6	5	6	5	2021-07-22	2021-07-22
P19623	P19623	5	5	5	Spermidine synthase	SRM		1	5	5	5	4	4	5	5	5	5	5	5	4	5	4	5	4	4	5	5	5	5	5	5	4	5	4	5	4	4	5	5	5	5	5	5	4	5	4	5	2021-08-23	2021-08-23
P19784	P19784	4	4	4	Casein kinase II subunit alpha	CSNK2A2		1	4	4	4	3	3	1	2	3	2	2	3	3	4	3	2	3	3	1	2	3	2	2	3	3	4	3	2	3	3	1	2	3	2	2	3	3	4	3	2	12	12
P19838	P19838	5	5	5	Nuclear factor NF-kappa-B p105 subunit;Nuclear factor NF-kappa-B p50 subunit	NFKB1		1	5	5	5	1	1	4	3	5	4	3	5	5	4	4	4	1	1	4	3	5	4	3	5	5	4	4	4	1	1	4	3	5	4	3	5	5	4	4	4	2021-01-09	2021-01-09
P19878	P19878	4	4	4	Neutrophil cytosol factor 2	NCF2		1	4	4	4	3	2	2	4	3	4	4	4	4	3	4	3	3	2	2	4	3	4	4	4	4	3	4	3	3	2	2	4	3	4	4	4	4	3	4	3	2021-09-09	2021-09-09
P19971	P19971	13	13	13	Thymidine phosphorylase	TYMP		1	13	13	13	9	6	8	9	10	11	10	11	10	9	10	8	9	6	8	9	10	11	10	11	10	9	10	8	9	6	8	9	10	11	10	11	10	9	10	8	46.5	46.5
P20020;Q16720;Q01814	P20020	6;1;1	6;1;1	3;0;0	Plasma membrane calcium-transporting ATPase 1	ATP2B1		3	6	6	3	3	3	5	4	5	6	3	5	6	2	1	3	3	3	5	4	5	6	3	5	6	2	1	3	1	1	3	2	3	3	1	3	3	1	0	2	2021-09-07	2021-09-07
P20042	P20042	6	6	6	Eukaryotic translation initiation factor 2 subunit 2	EIF2S2		1	6	6	6	5	4	5	4	5	5	5	5	5	5	4	4	5	4	5	4	5	5	5	5	5	5	4	4	5	4	5	4	5	5	5	5	5	5	4	4	18	18
P20073	P20073	8	8	8	Annexin A7	ANXA7		1	8	8	8	4	4	6	6	6	3	3	7	6	7	7	6	4	4	6	6	6	3	3	7	6	7	7	6	4	4	6	6	6	3	3	7	6	7	7	6	2021-02-24	2021-02-24
P20138	P20138	3	3	3	Myeloid cell surface antigen CD33	CD33		1	3	3	3	1	3	3	3	2	1	3	3	3	2	3	3	1	3	3	3	2	1	3	3	3	2	3	3	1	3	3	3	2	1	3	3	3	2	3	3	2021-06-12	2021-06-12
P20290	P20290	6	6	6	Transcription factor BTF3	BTF3		1	6	6	6	5	6	5	5	5	5	5	5	5	6	6	5	5	6	5	5	5	5	5	5	5	6	6	5	5	6	5	5	5	5	5	5	5	6	6	5	48.5	48.5
P20292	P20292	2	2	2	Arachidonate 5-lipoxygenase-activating protein	ALOX5AP		1	2	2	2	2	2	2	2	2	2	2	2	2	2	2	2	2	2	2	2	2	2	2	2	2	2	2	2	2	2	2	2	2	2	2	2	2	2	2	2	2021-07-26	2021-07-26
P20333	P20333	1	1	1	Tumor necrosis factor receptor superfamily member 1B;Tumor necrosis factor receptor superfamily member 1b, membrane form;Tumor necrosis factor-binding protein 2	TNFRSF1B		1	1	1	1	0	0	1	1	1	1	0	1	1	1	1	0	0	0	1	1	1	1	0	1	1	1	1	0	0	0	1	1	1	1	0	1	1	1	1	0	2021-05-06	2021-05-06
P20339	P20339	3	1	1	Ras-related protein Rab-5A	RAB5A		1	3	1	1	2	3	2	3	3	3	2	2	3	3	2	3	1	1	1	1	1	1	1	1	1	1	0	1	1	1	1	1	1	1	1	1	1	1	0	1	2021-03-16	2021-05-06
P20340;Q9NRW1;Q53S08	P20340;Q9NRW1	6;3;1	6;3;1	5;2;1	Ras-related protein Rab-6A;Ras-related protein Rab-6B	RAB6A;RAB6B	;	3	6	6	5	5	3	4	5	4	4	6	4	5	4	4	4	5	3	4	5	4	4	6	4	5	4	4	4	4	2	3	4	3	3	5	3	4	3	3	3	2021-04-27	2021-04-27
P20591	P20591	6	6	3	Interferon-induced GTP-binding protein Mx1;Interferon-induced GTP-binding protein Mx1, N-terminally processed	MX1		1	6	6	3	5	3	3	4	5	5	5	5	5	4	4	3	5	3	3	4	5	5	5	5	5	4	4	3	2	1	1	2	2	2	3	3	2	2	2	1	2021-03-15	2021-03-15
P20592	P20592	6	3	3	Interferon-induced GTP-binding protein Mx2	MX2		1	6	3	3	4	3	2	2	4	4	4	5	4	3	3	3	1	1	0	0	1	1	2	3	1	1	1	1	1	1	0	0	1	1	2	3	1	1	1	1	2021-03-12	2021-05-05
P20618	P20618	10	10	10	Proteasome subunit beta type-1	PSMB1		1	10	10	10	9	8	8	9	8	9	9	9	9	9	8	7	9	8	8	9	8	9	9	9	9	9	8	7	9	8	8	9	8	9	9	9	9	9	8	7	52.7	52.7
P20645	P20645	3	3	3	Cation-dependent mannose-6-phosphate receptor	M6PR		1	3	3	3	2	2	2	3	2	3	2	2	2	3	3	2	2	2	2	3	2	3	2	2	2	3	3	2	2	2	2	3	2	3	2	2	2	3	3	2	2021-08-14	2021-08-14
P20674	P20674	7	7	7	Cytochrome c oxidase subunit 5A, mitochondrial	COX5A		1	7	7	7	4	6	6	3	4	5	4	5	5	6	4	4	4	6	6	3	4	5	4	5	5	6	4	4	4	6	6	3	4	5	4	5	5	6	4	4	53.3	53.3
P20700	P20700	47	45	40	Lamin-B1	LMNB1		1	47	45	40	42	45	41	46	43	41	37	44	42	44	44	46	41	44	39	44	41	40	35	42	41	42	42	44	37	40	35	40	37	36	31	38	37	38	38	39	66	66
P20701	P20701	12	12	12	Integrin alpha-L	ITGAL		1	12	12	12	8	12	11	12	10	10	9	10	11	11	11	11	8	12	11	12	10	10	9	10	11	11	11	11	8	12	11	12	10	10	9	10	11	11	11	11	2021-01-17	2021-01-17
P20702;Q13349	P20702	13;2	12;1	12;1	Integrin alpha-X	ITGAX		2	13	12	12	10	13	11	12	8	12	7	11	12	11	10	11	9	12	10	11	7	11	6	10	11	10	9	10	9	12	10	11	7	11	6	10	11	10	9	10	2021-05-17	2021-05-16
P20810	P20810	10	10	10	Calpastatin	CAST		1	10	10	10	6	6	5	7	7	5	6	8	6	7	8	6	6	6	5	7	7	5	6	8	6	7	8	6	6	6	5	7	7	5	6	8	6	7	8	6	2021-08-29	2021-08-29
P20839	P20839	3	2	2	Inosine-5-monophosphate dehydrogenase 1	IMPDH1		1	3	2	2	1	3	2	3	2	3	2	3	3	3	3	3	0	2	1	2	1	2	1	2	2	2	2	2	0	2	1	2	1	2	1	2	2	2	2	2	2021-07-10	2021-01-09
P20933	P20933	1	1	1	N(4)-(beta-N-acetylglucosaminyl)-L-asparaginase;Glycosylasparaginase alpha chain;Glycosylasparaginase beta chain	AGA		1	1	1	1	1	0	1	1	1	1	1	1	0	1	1	1	1	0	1	1	1	1	1	1	0	1	1	1	1	0	1	1	1	1	1	1	0	1	1	1	2021-05-03	2021-05-03
P20936	P20936	5	5	5	Ras GTPase-activating protein 1	RASA1		1	5	5	5	5	4	3	2	4	3	3	4	4	4	4	4	5	4	3	2	4	3	3	4	4	4	4	4	5	4	3	2	4	3	3	4	4	4	4	4	2021-04-05	2021-04-05
P21266	P21266	5	5	4	Glutathione S-transferase Mu 3	GSTM3		1	5	5	4	2	3	3	5	3	3	2	3	3	4	4	3	2	3	3	5	3	3	2	3	3	4	4	3	1	3	3	4	2	2	1	3	3	4	3	3	2021-08-25	2021-08-25
P21281;P15313	P21281	23;7	23;7	23;7	V-type proton ATPase subunit B, brain isoform	ATP6V1B2		2	23	23	23	22	22	19	22	23	22	22	23	21	23	22	22	22	22	19	22	23	22	22	23	21	23	22	22	22	22	19	22	23	22	22	23	21	23	22	22	55	55
P21283	P21283	4	4	4	V-type proton ATPase subunit C 1	ATP6V1C1		1	4	4	4	4	3	2	3	4	3	3	3	3	3	3	4	4	3	2	3	4	3	3	3	3	3	3	4	4	3	2	3	4	3	3	3	3	3	3	4	2021-09-14	2021-09-14
P21291	P21291	3	3	3	Cysteine and glycine-rich protein 1	CSRP1		1	3	3	3	3	3	3	2	3	2	2	3	3	3	3	3	3	3	3	2	3	2	2	3	3	3	3	3	3	3	3	2	3	2	2	3	3	3	3	3	2021-04-25	2021-04-25
P21399	P21399	7	7	7	Cytoplasmic aconitate hydratase	ACO1		1	7	7	7	2	4	5	6	4	5	3	6	6	6	6	5	2	4	5	6	4	5	3	6	6	6	6	5	2	4	5	6	4	5	3	6	6	6	6	5	2021-03-14	2021-03-14
P21730	P21730	2	2	2	C5a anaphylatoxin chemotactic receptor 1	C5AR1		1	2	2	2	2	1	2	2	2	2	2	2	2	2	1	2	2	1	2	2	2	2	2	2	2	2	1	2	2	1	2	2	2	2	2	2	2	2	1	2	2021-04-05	2021-04-05
P21757	P21757	6	6	6	Macrophage scavenger receptor types I and II	MSR1		1	6	6	6	3	4	2	4	3	4	2	3	2	4	4	3	3	4	2	4	3	4	2	3	2	4	4	3	3	4	2	4	3	4	2	3	2	4	4	3	2021-04-20	2021-04-20
P21796	P21796	20	20	20	Voltage-dependent anion-selective channel protein 1	VDAC1		1	20	20	20	18	18	13	17	18	17	17	19	18	19	19	15	18	18	13	17	18	17	17	19	18	19	19	15	18	18	13	17	18	17	17	19	18	19	19	15	71.7	71.7
P21912	P21912	5	5	5	Succinate dehydrogenase [ubiquinone] iron-sulfur subunit, mitochondrial	SDHB		1	5	5	5	5	5	4	5	5	4	3	5	4	5	4	4	5	5	4	5	5	4	3	5	4	5	4	4	5	5	4	5	5	4	3	5	4	5	4	4	2021-06-13	2021-06-13
P21953	P21953	3	3	3	2-oxoisovalerate dehydrogenase subunit beta, mitochondrial	BCKDHB		1	3	3	3	2	3	3	3	2	1	2	3	2	3	3	3	2	3	3	3	2	1	2	3	2	3	3	3	2	3	3	3	2	1	2	3	2	3	3	3	2021-02-08	2021-02-08
P21964	P21964	22	22	22	Catechol O-methyltransferase	COMT		1	22	22	22	21	20	16	19	20	20	19	20	20	19	21	21	21	20	16	19	20	20	19	20	20	19	21	21	21	20	16	19	20	20	19	20	20	19	21	21	74.9	74.9
P21980	P21980	5	5	5	Protein-glutamine gamma-glutamyltransferase 2	TGM2		1	5	5	5	1	0	1	0	1	4	2	3	3	1	0	0	1	0	1	0	1	4	2	3	3	1	0	0	1	0	1	0	1	4	2	3	3	1	0	0	2021-03-08	2021-03-08
P22033	P22033	3	3	3	Methylmalonyl-CoA mutase, mitochondrial	MUT		1	3	3	3	1	2	3	3	2	0	0	2	1	2	2	1	1	2	3	3	2	0	0	2	1	2	2	1	1	2	3	3	2	0	0	2	1	2	2	1	2021-03-06	2021-03-06
P22059	P22059	4	4	4	Oxysterol-binding protein 1	OSBP		1	4	4	4	3	2	3	3	4	4	3	4	3	4	4	3	3	2	3	3	4	4	3	4	3	4	4	3	3	2	3	3	4	4	3	4	3	4	4	3	2021-04-07	2021-04-07
P22061	P22061	6	6	6	Protein-L-isoaspartate(D-aspartate) O-methyltransferase	PCMT1		1	6	6	6	5	5	4	6	6	6	5	6	6	5	5	5	5	5	4	6	6	6	5	6	6	5	5	5	5	5	4	6	6	6	5	6	6	5	5	5	51.5	51.5
P22087	P22087	8	8	7	rRNA 2-O-methyltransferase fibrillarin	FBL		1	8	8	7	7	7	6	5	8	6	6	7	6	7	7	7	7	7	6	5	8	6	6	7	6	7	7	7	6	6	5	4	7	5	5	6	5	6	6	6	37.1	37.1
P22090	P22090	9	4	2	40S ribosomal protein S4, Y isoform 1	RPS4Y1		1	9	4	2	7	8	7	8	7	6	7	7	7	7	8	8	3	3	4	4	3	2	3	3	3	3	4	3	1	1	2	2	1	1	1	1	1	2	2	1	40.3	2021-08-19
P22102	P22102	16	16	16	Trifunctional purine biosynthetic protein adenosine-3;Phosphoribosylamine--glycine ligase;Phosphoribosylformylglycinamidine cyclo-ligase;Phosphoribosylglycinamide formyltransferase	GART		1	16	16	16	16	15	15	14	16	16	16	16	15	14	15	15	16	15	15	14	16	16	16	16	15	14	15	15	16	15	15	14	16	16	16	16	15	14	15	15	2021-05-24	2021-05-24
P22234	P22234	17	17	17	Multifunctional protein ADE2;Phosphoribosylaminoimidazole-succinocarboxamide synthase;Phosphoribosylaminoimidazole carboxylase	PAICS		1	17	17	17	14	17	14	17	16	14	12	15	15	16	16	17	14	17	14	17	16	14	12	15	15	16	16	17	14	17	14	17	16	14	12	15	15	16	16	17	45.2	45.2
P22307	P22307	19	19	19	Non-specific lipid-transfer protein	SCP2		1	19	19	19	16	19	15	18	15	16	14	17	17	19	18	16	16	19	15	18	15	16	14	17	17	19	18	16	16	19	15	18	15	16	14	17	17	19	18	16	43.1	43.1
P22314	P22314	39	39	39	Ubiquitin-like modifier-activating enzyme 1	UBA1		1	39	39	39	32	35	33	34	33	38	34	35	35	38	36	33	32	35	33	34	33	38	34	35	35	38	36	33	32	35	33	34	33	38	34	35	35	38	36	33	50.6	50.6
P22392;O60361	P22392;O60361	8;4	8;4	4;2	Nucleoside diphosphate kinase B;Putative nucleoside diphosphate kinase	NME2;NME2P1	;	2	8	8	4	7	7	7	7	7	7	8	8	7	7	8	7	7	7	7	7	7	7	8	8	7	7	8	7	4	4	4	4	4	4	4	4	4	4	4	4	55.3	55.3
P22612;P22694;P17612	P22612;P22694;P17612	2;1;1	2;1;1	2;1;1	cAMP-dependent protein kinase catalytic subunit gamma;cAMP-dependent protein kinase catalytic subunit beta;cAMP-dependent protein kinase catalytic subunit alpha	PRKACG;PRKACB;PRKACA	;;	3	2	2	2	1	1	1	2	2	2	1	2	2	1	2	1	1	1	1	2	2	2	1	2	2	1	2	1	1	1	1	2	2	2	1	2	2	1	2	1	2021-03-12	2021-03-12
P22626	P22626	29	29	29	Heterogeneous nuclear ribonucleoproteins A2/B1	HNRNPA2B1		1	29	29	29	26	27	24	28	24	28	25	28	23	28	28	24	26	27	24	28	24	28	25	28	23	28	28	24	26	27	24	28	24	28	25	28	23	28	28	24	62.3	62.3
P22681	P22681	5	5	5	E3 ubiquitin-protein ligase CBL	CBL		1	5	5	5	1	4	5	4	5	4	1	3	4	5	5	5	1	4	5	4	5	4	1	3	4	5	5	5	1	4	5	4	5	4	1	3	4	5	5	5	2021-07-08	2021-07-08
P22695	P22695	21	21	21	Cytochrome b-c1 complex subunit 2, mitochondrial	UQCRC2		1	21	21	21	20	20	20	21	20	20	18	20	20	20	21	19	20	20	20	21	20	20	18	20	20	20	21	19	20	20	20	21	20	20	18	20	20	20	21	19	51.4	51.4
P22732	P22732	2	2	2	Solute carrier family 2, facilitated glucose transporter member 5	SLC2A5		1	2	2	2	2	1	2	1	2	1	2	2	2	1	1	2	2	1	2	1	2	1	2	2	2	1	1	2	2	1	2	1	2	1	2	2	2	1	1	2	2021-04-06	2021-04-06
P22749	P22749	4	4	4	Granulysin	GNLY		1	4	4	4	2	2	3	3	3	3	2	4	4	2	3	2	2	2	3	3	3	3	2	4	4	2	3	2	2	2	3	3	3	3	2	4	4	2	3	2	36.6	36.6
P22830	P22830	3	3	3	Ferrochelatase, mitochondrial	FECH		1	3	3	3	1	1	2	3	1	2	1	0	1	2	2	2	1	1	2	3	1	2	1	0	1	2	2	2	1	1	2	3	1	2	1	0	1	2	2	2	2021-02-10	2021-02-10
P23141;Q9UKY3	P23141	27;1	27;1	27;1	Liver carboxylesterase 1	CES1		2	27	27	27	26	26	25	26	27	27	25	26	27	26	25	26	26	26	25	26	27	27	25	26	27	26	25	26	26	26	25	26	27	27	25	26	27	26	25	26	50.8	50.8
P23193	P23193	5	5	5	Transcription elongation factor A protein 1	TCEA1		1	5	5	5	2	3	3	4	2	2	2	4	2	4	4	2	2	3	3	4	2	2	2	4	2	4	4	2	2	3	3	4	2	2	2	4	2	4	4	2	2021-06-14	2021-06-14
P23219	P23219	15	15	15	Prostaglandin G/H synthase 1	PTGS1		1	15	15	15	12	15	12	14	13	12	13	13	14	13	14	12	12	15	12	14	13	12	13	13	14	13	14	12	12	15	12	14	13	12	13	13	14	13	14	12	38.7	38.7
P23246	P23246	28	28	27	Splicing factor, proline- and glutamine-rich	SFPQ		1	28	28	27	24	24	21	26	24	25	22	24	23	21	26	22	24	24	21	26	24	25	22	24	23	21	26	22	24	23	20	25	24	25	21	23	22	20	25	21	38.8	38.8
P23258;Q9NRH3	P23258	3;1	3;1	3;1	Tubulin gamma-1 chain	TUBG1		2	3	3	3	2	3	2	3	3	3	1	3	3	2	3	3	2	3	2	3	3	3	1	3	3	2	3	3	2	3	2	3	3	3	1	3	3	2	3	3	2021-05-13	2021-05-13
P23284	P23284	14	14	14	Peptidyl-prolyl cis-trans isomerase B	PPIB		1	14	14	14	14	13	14	13	14	13	13	14	13	14	14	14	14	13	14	13	14	13	13	14	13	14	14	14	14	13	14	13	14	13	13	14	13	14	14	14	62.5	62.5
P23368;Q16798	P23368	18;1	18;1	18;1	NAD-dependent malic enzyme, mitochondrial	ME2		2	18	18	18	15	17	12	16	17	18	14	16	16	17	13	15	15	17	12	16	17	18	14	16	16	17	13	15	15	17	12	16	17	18	14	16	16	17	13	15	53.6	53.6
P23381	P23381	14	14	14	Tryptophan--tRNA ligase, cytoplasmic;T1-TrpRS;T2-TrpRS	WARS		1	14	14	14	12	13	10	13	13	13	11	12	13	13	14	12	12	13	10	13	13	13	11	12	13	13	14	12	12	13	10	13	13	13	11	12	13	13	14	12	39.9	39.9
P23396	P23396	17	17	17	40S ribosomal protein S3	RPS3		1	17	17	17	16	17	16	17	17	17	17	16	17	16	17	17	16	17	16	17	17	17	17	16	17	16	17	17	16	17	16	17	17	17	17	16	17	16	17	17	66.7	66.7
P23469	P23469	6	6	6	Receptor-type tyrosine-protein phosphatase epsilon	PTPRE		1	6	6	6	5	6	6	5	5	5	5	6	6	5	6	6	5	6	6	5	5	5	5	6	6	5	6	6	5	6	6	5	5	5	5	6	6	5	6	6	2021-01-14	2021-01-14
P23497;Q9H930	P23497	3;1	2;1	2;1	Nuclear autoantigen Sp-100	SP100		2	3	2	2	3	2	3	3	3	3	2	3	3	2	3	2	2	1	2	2	2	2	1	2	2	1	2	1	2	1	2	2	2	2	1	2	2	1	2	1	2021-01-04	2021-02-03
P23511	P23511	1	1	1	Nuclear transcription factor Y subunit alpha	NFYA		1	1	1	1	0	1	1	0	0	0	1	0	0	0	1	0	0	1	1	0	0	0	1	0	0	0	1	0	0	1	1	0	0	0	1	0	0	0	1	0	2021-05-05	2021-05-05
P23526	P23526	14	14	14	Adenosylhomocysteinase	AHCY		1	14	14	14	13	14	13	13	13	12	13	12	13	14	14	13	13	14	13	13	13	12	13	12	13	14	14	13	13	14	13	13	13	12	13	12	13	14	14	13	38.4	38.4
P23528	P23528	22	22	16	Cofilin-1	CFL1		1	22	22	16	18	21	20	22	19	19	19	21	20	20	22	19	18	21	20	22	19	19	19	21	20	20	22	19	12	15	14	16	13	13	14	15	14	14	16	13	91.6	91.6
P23588	P23588	8	8	8	Eukaryotic translation initiation factor 4B	EIF4B		1	8	8	8	4	6	7	7	8	4	3	5	5	6	5	6	4	6	7	7	8	4	3	5	5	6	5	6	4	6	7	7	8	4	3	5	5	6	5	6	17	17
P23786	P23786	16	16	16	Carnitine O-palmitoyltransferase 2, mitochondrial	CPT2		1	16	16	16	16	14	13	16	16	14	15	15	14	16	16	16	16	14	13	16	16	14	15	15	14	16	16	16	16	14	13	16	16	14	15	15	14	16	16	16	29	29
P23919	P23919	5	5	5	Thymidylate kinase	DTYMK		1	5	5	5	4	5	5	5	4	5	4	5	4	3	5	4	4	5	5	5	4	5	4	5	4	3	5	4	4	5	5	5	4	5	4	5	4	3	5	4	2021-08-19	2021-08-19
P23921	P23921	3	3	3	Ribonucleoside-diphosphate reductase large subunit	RRM1		1	3	3	3	2	3	3	3	2	1	1	3	3	3	3	3	2	3	3	3	2	1	1	3	3	3	3	3	2	3	3	3	2	1	1	3	3	3	3	3	2021-05-03	2021-05-03
P24534	P24534	6	6	6	Elongation factor 1-beta	EEF1B2		1	6	6	6	6	5	3	6	5	5	5	6	5	5	6	4	6	5	3	6	5	5	5	6	5	5	6	4	6	5	3	6	5	5	5	6	5	5	6	4	44	44
P24539	P24539	10	10	10	ATP synthase F(0) complex subunit B1, mitochondrial	ATP5F1		1	10	10	10	9	8	7	8	10	10	9	10	9	7	9	8	9	8	7	8	10	10	9	10	9	7	9	8	9	8	7	8	10	10	9	10	9	7	9	8	34	34
P24666	P24666	3	3	3	Low molecular weight phosphotyrosine protein phosphatase	ACP1		1	3	3	3	2	2	2	3	3	2	2	3	2	3	3	3	2	2	2	3	3	2	2	3	2	3	3	3	2	2	2	3	3	2	2	3	2	3	3	3	2021-05-21	2021-05-21
P24752	P24752	17	17	17	Acetyl-CoA acetyltransferase, mitochondrial	ACAT1		1	17	17	17	14	16	14	15	16	15	15	15	14	17	16	15	14	16	14	15	16	15	15	15	14	17	16	15	14	16	14	15	16	15	15	15	14	17	16	15	48.2	48.2
P24844	P24844	3	1	1	Myosin regulatory light polypeptide 9	MYL9		1	3	1	1	2	3	3	2	2	2	3	3	2	2	3	2	1	1	1	0	0	0	1	1	1	0	1	1	1	1	1	0	0	0	1	1	1	0	1	1	32.6	2021-06-11
P24928	P24928	2	2	2	DNA-directed RNA polymerase II subunit RPB1	POLR2A		1	2	2	2	1	1	1	1	1	1	1	0	1	2	0	0	1	1	1	1	1	1	1	0	1	2	0	0	1	1	1	1	1	1	1	0	1	2	0	0	2021-04-01	2021-04-01
P24941	P24941	2	1	1	Cyclin-dependent kinase 2	CDK2		1	2	1	1	2	2	2	2	2	2	2	2	2	2	2	2	1	1	1	1	1	1	1	1	1	1	1	1	1	1	1	1	1	1	1	1	1	1	1	1	2021-01-08	2021-04-05
P25098;P35626	P25098	9;2	9;2	9;2	Beta-adrenergic receptor kinase 1	ADRBK1		2	9	9	9	3	6	7	5	5	5	4	5	3	5	6	5	3	6	7	5	5	5	4	5	3	5	6	5	3	6	7	5	5	5	4	5	3	5	6	5	2021-01-15	2021-01-15
P25205	P25205	12	12	12	DNA replication licensing factor MCM3	MCM3		1	12	12	12	7	12	9	9	8	8	9	8	7	11	10	11	7	12	9	9	8	8	9	8	7	11	10	11	7	12	9	9	8	8	9	8	7	11	10	11	2021-08-17	2021-08-17
P25325	P25325	4	4	4	3-mercaptopyruvate sulfurtransferase	MPST		1	4	4	4	3	3	2	3	3	3	3	2	3	4	4	3	3	3	2	3	3	3	3	2	3	4	4	3	3	3	2	3	3	3	3	2	3	4	4	3	2021-09-24	2021-09-24
P25398	P25398	13	13	13	40S ribosomal protein S12	RPS12		1	13	13	13	13	12	10	11	13	12	12	12	11	13	12	11	13	12	10	11	13	12	12	12	11	13	12	11	13	12	10	11	13	12	12	12	11	13	12	11	81.8	81.8
P25685;Q9UDY4	P25685	6;1	6;1	6;1	DnaJ homolog subfamily B member 1	DNAJB1		2	6	6	6	5	5	5	6	6	6	4	5	6	6	6	6	5	5	5	6	6	6	4	5	6	6	6	6	5	5	5	6	6	6	4	5	6	6	6	6	2021-05-21	2021-05-21
P25705	P25705	36	36	36	ATP synthase subunit alpha, mitochondrial	ATP5A1		1	36	36	36	33	35	33	35	33	34	32	34	33	33	33	36	33	35	33	35	33	34	32	34	33	33	33	36	33	35	33	35	33	34	32	34	33	33	33	36	58.8	58.8
P25774	P25774	12	12	12	Cathepsin S	CTSS		1	12	12	12	10	12	12	12	11	12	12	12	12	12	11	11	10	12	12	12	11	12	12	12	12	12	11	11	10	12	12	12	11	12	12	12	12	12	11	11	2021-08-30	2021-08-30
P25786	P25786	16	16	16	Proteasome subunit alpha type-1	PSMA1		1	16	16	16	13	16	15	16	15	15	15	16	16	16	16	15	13	16	15	16	15	15	15	16	16	16	16	15	13	16	15	16	15	15	15	16	16	16	16	15	70.3	70.3
P25787	P25787	10	10	10	Proteasome subunit alpha type-2	PSMA2		1	10	10	10	9	9	7	9	9	7	8	9	8	8	9	7	9	9	7	9	9	7	8	9	8	8	9	7	9	9	7	9	9	7	8	9	8	8	9	7	52.6	52.6
P25788	P25788	8	8	8	Proteasome subunit alpha type-3	PSMA3		1	8	8	8	8	8	8	8	8	8	8	7	8	8	7	7	8	8	8	8	8	8	8	7	8	8	7	7	8	8	8	8	8	8	8	7	8	8	7	7	37.6	37.6
P25789	P25789	9	9	9	Proteasome subunit alpha type-4	PSMA4		1	9	9	9	7	9	6	9	8	8	7	9	7	7	9	8	7	9	6	9	8	8	7	9	7	7	9	8	7	9	6	9	8	8	7	9	7	7	9	8	39.8	39.8
P26010	P26010	6	6	6	Integrin beta-7	ITGB7		1	6	6	6	5	5	5	5	5	5	3	5	4	5	5	4	5	5	5	5	5	5	3	5	4	5	5	4	5	5	5	5	5	5	3	5	4	5	5	4	2021-09-11	2021-09-11
P26038	P26038	64	64	51	Moesin	MSN		1	64	64	51	58	62	57	62	62	62	59	61	60	62	62	62	58	62	57	62	62	62	59	61	60	62	62	62	46	50	47	49	49	49	47	48	48	49	49	49	82.7	82.7
P26196	P26196	6	6	6	Probable ATP-dependent RNA helicase DDX6	DDX6		1	6	6	6	6	6	5	6	5	5	6	6	5	6	6	6	6	6	5	6	5	5	6	6	5	6	6	6	6	6	5	6	5	5	6	6	5	6	6	6	2021-07-21	2021-07-21
P26358	P26358	2	2	2	DNA (cytosine-5)-methyltransferase 1	DNMT1		1	2	2	2	1	1	2	1	1	0	0	0	0	1	1	1	1	1	2	1	1	0	0	0	0	1	1	1	1	1	2	1	1	0	0	0	0	1	1	1	2021-09-01	2021-09-01
P26368	P26368	4	4	4	Splicing factor U2AF 65 kDa subunit	U2AF2		1	4	4	4	2	4	3	3	2	2	1	2	3	2	2	3	2	4	3	3	2	2	1	2	3	2	2	3	2	4	3	3	2	2	1	2	3	2	2	3	2021-03-18	2021-03-18
P26373	P26373	14	14	14	60S ribosomal protein L13	RPL13		1	14	14	14	12	12	14	11	12	12	11	11	11	11	11	13	12	12	14	11	12	12	11	11	11	11	11	13	12	12	14	11	12	12	11	11	11	11	11	13	51.2	51.2
P26440	P26440	7	7	7	Isovaleryl-CoA dehydrogenase, mitochondrial	IVD		1	7	7	7	7	6	6	5	5	6	5	5	4	5	5	6	7	6	6	5	5	6	5	5	4	5	5	6	7	6	6	5	5	6	5	5	4	5	5	6	2021-02-20	2021-02-20
P26447	P26447	7	7	7	Protein S100-A4	S100A4		1	7	7	7	5	6	7	6	6	6	5	7	6	7	6	7	5	6	7	6	6	6	5	7	6	7	6	7	5	6	7	6	6	6	5	7	6	7	6	7	54.5	54.5
P26572	P26572	6	6	6	Alpha-1,3-mannosyl-glycoprotein 2-beta-N-acetylglucosaminyltransferase	MGAT1		1	6	6	6	6	5	5	6	5	6	5	6	5	6	6	6	6	5	5	6	5	6	5	6	5	6	6	6	6	5	5	6	5	6	5	6	5	6	6	6	2021-05-22	2021-05-22
P26583	P26583	9	7	7	High mobility group protein B2	HMGB2		1	9	7	7	8	9	8	8	8	9	8	9	8	8	8	8	6	7	7	7	6	7	6	7	6	7	6	7	6	7	7	7	6	7	6	7	6	7	6	7	40.2	2021-08-27
P26599	P26599	20	20	17	Polypyrimidine tract-binding protein 1	PTBP1		1	20	20	17	18	20	16	20	18	18	18	20	18	18	19	19	18	20	16	20	18	18	18	20	18	18	19	19	15	17	13	17	15	15	15	17	15	15	16	16	51	51
P26639;A2RTX5	P26639	19;1	19;1	19;1	Threonine--tRNA ligase, cytoplasmic	TARS		2	19	19	19	11	13	15	16	15	17	15	17	14	13	17	15	11	13	15	16	15	17	15	17	14	13	17	15	11	13	15	16	15	17	15	17	14	13	17	15	33.1	33.1
P26640	P26640	33	33	33	Valine--tRNA ligase	VARS		1	33	33	33	25	30	25	29	28	28	24	31	27	29	29	28	25	30	25	29	28	28	24	31	27	29	29	28	25	30	25	29	28	28	24	31	27	29	29	28	42.3	42.3
P26641	P26641	19	19	19	Elongation factor 1-gamma	EEF1G		1	19	19	19	16	15	15	16	17	17	18	18	18	17	17	16	16	15	15	16	17	17	18	18	18	17	17	16	16	15	15	16	17	17	18	18	18	17	17	16	43.9	43.9
P26885	P26885	4	4	4	Peptidyl-prolyl cis-trans isomerase FKBP2	FKBP2		1	4	4	4	4	4	3	4	4	4	4	4	4	4	3	4	4	4	3	4	4	4	4	4	4	4	3	4	4	4	3	4	4	4	4	4	4	4	3	4	33.8	33.8
P27105	P27105	9	9	9	Erythrocyte band 7 integral membrane protein	STOM		1	9	9	9	5	6	6	7	5	7	6	6	6	6	8	8	5	6	6	7	5	7	6	6	6	6	8	8	5	6	6	7	5	7	6	6	6	6	8	8	49.7	49.7
P27348	P27348	13	9	9	14-3-3 protein theta	YWHAQ		1	13	9	9	11	11	11	12	11	13	11	13	12	12	11	12	7	8	7	8	7	9	7	9	8	8	8	9	7	8	7	8	7	9	7	9	8	8	8	9	53.1	42.4
P27635;Q96L21	P27635	9;3	9;3	9;3	60S ribosomal protein L10	RPL10		2	9	9	9	9	9	8	9	9	9	8	9	9	8	9	9	9	9	8	9	9	9	8	9	9	8	9	9	9	9	8	9	9	9	8	9	9	8	9	9	38.8	38.8
P27694	P27694	6	6	6	Replication protein A 70 kDa DNA-binding subunit;Replication protein A 70 kDa DNA-binding subunit, N-terminally processed	RPA1		1	6	6	6	4	5	4	6	4	6	2	5	5	5	5	6	4	5	4	6	4	6	2	5	5	5	5	6	4	5	4	6	4	6	2	5	5	5	5	6	2021-05-17	2021-05-17
P27695	P27695	16	16	16	DNA-(apurinic or apyrimidinic site) lyase;DNA-(apurinic or apyrimidinic site) lyase, mitochondrial	APEX1		1	16	16	16	13	14	13	15	15	14	13	13	14	15	16	13	13	14	13	15	15	14	13	13	14	15	16	13	13	14	13	15	15	14	13	13	14	15	16	13	64.5	64.5
P27707	P27707	3	3	3	Deoxycytidine kinase	DCK		1	3	3	3	1	2	3	2	3	3	2	3	3	2	3	3	1	2	3	2	3	3	2	3	3	2	3	3	1	2	3	2	3	3	2	3	3	2	3	3	2021-03-12	2021-03-12
P27708	P27708	9	9	9	CAD protein;Glutamine-dependent carbamoyl-phosphate synthase;Aspartate carbamoyltransferase;Dihydroorotase	CAD		1	9	9	9	6	6	5	8	8	7	5	8	8	8	7	6	6	6	5	8	8	7	5	8	8	8	7	6	6	6	5	8	8	7	5	8	8	8	7	6	2021-02-06	2021-02-06
P27797	P27797	24	24	24	Calreticulin	CALR		1	24	24	24	21	20	20	23	23	24	23	22	21	23	23	22	21	20	20	23	23	24	23	22	21	23	23	22	21	20	20	23	23	24	23	22	21	23	23	22	66.2	66.2
P27816	P27816	13	13	13	Microtubule-associated protein 4	MAP4		1	13	13	13	9	9	11	11	10	10	8	12	11	12	12	11	9	9	11	11	10	10	8	12	11	12	12	11	9	9	11	11	10	10	8	12	11	12	12	11	2021-07-20	2021-07-20
P27824	P27824	28	28	28	Calnexin	CANX		1	28	28	28	23	27	22	25	25	24	24	24	24	25	25	21	23	27	22	25	25	24	24	24	24	25	25	21	23	27	22	25	25	24	24	24	24	25	25	21	49	49
P27986	P27986	3	3	3	Phosphatidylinositol 3-kinase regulatory subunit alpha	PIK3R1		1	3	3	3	0	1	2	3	3	2	0	2	2	2	2	2	0	1	2	3	3	2	0	2	2	2	2	2	0	1	2	3	3	2	0	2	2	2	2	2	5	5
P28062	P28062	8	8	8	Proteasome subunit beta type-8	PSMB8		1	8	8	8	6	8	6	6	7	7	6	7	7	8	8	6	6	8	6	6	7	7	6	7	7	8	8	6	6	8	6	6	7	7	6	7	7	8	8	6	37.3	37.3
P28065	P28065	5	5	5	Proteasome subunit beta type-9	PSMB9		1	5	5	5	5	5	4	5	5	5	5	4	3	4	4	4	5	5	4	5	5	5	5	4	3	4	4	4	5	5	4	5	5	5	5	4	3	4	4	4	2021-03-23	2021-03-23
P28066	P28066	10	10	10	Proteasome subunit alpha type-5	PSMA5		1	10	10	10	8	8	9	8	8	9	9	8	7	9	9	8	8	8	9	8	8	9	9	8	7	9	9	8	8	8	9	8	8	9	9	8	7	9	9	8	50.2	50.2
P28070	P28070	7	7	7	Proteasome subunit beta type-4	PSMB4		1	7	7	7	5	7	6	7	6	6	6	5	6	7	7	6	5	7	6	7	6	6	6	5	6	7	7	6	5	7	6	7	6	6	6	5	6	7	7	6	39.8	39.8
P28072	P28072	4	4	4	Proteasome subunit beta type-6	PSMB6		1	4	4	4	4	3	2	4	4	4	3	4	3	4	4	4	4	3	2	4	4	4	3	4	3	4	4	4	4	3	2	4	4	4	3	4	3	4	4	4	2021-03-29	2021-03-29
P28288	P28288	4	4	4	ATP-binding cassette sub-family D member 3	ABCD3		1	4	4	4	2	2	2	3	3	3	3	2	3	2	3	2	2	2	2	3	3	3	3	2	3	2	3	2	2	2	2	3	3	3	3	2	3	2	3	2	2021-02-05	2021-02-05
P28331	P28331	15	15	15	NADH-ubiquinone oxidoreductase 75 kDa subunit, mitochondrial	NDUFS1		1	15	15	15	7	9	13	12	14	11	9	12	11	13	11	14	7	9	13	12	14	11	9	12	11	13	11	14	7	9	13	12	14	11	9	12	11	13	11	14	32	32
P28340	P28340	1	1	1	DNA polymerase delta catalytic subunit	POLD1		1	1	1	1	1	1	1	1	1	1	1	1	1	1	1	1	1	1	1	1	1	1	1	1	1	1	1	1	1	1	1	1	1	1	1	1	1	1	1	1	2021-04-01	2021-04-01
P28482;P27361	P28482	7;2	7;2	7;2	Mitogen-activated protein kinase 1	MAPK1		2	7	7	7	5	6	7	7	6	6	6	6	7	6	5	7	5	6	7	7	6	6	6	6	7	6	5	7	5	6	7	7	6	6	6	6	7	6	5	7	2021-04-26	2021-04-26
P28799	P28799	9	9	9	Granulins;Acrogranin;Paragranulin;Granulin-1;Granulin-2;Granulin-3;Granulin-4;Granulin-5;Granulin-6;Granulin-7	GRN		1	9	9	9	9	9	9	9	9	8	7	9	9	9	9	9	9	9	9	9	9	8	7	9	9	9	9	9	9	9	9	9	9	8	7	9	9	9	9	9	17	17
P28838	P28838	30	30	30	Cytosol aminopeptidase	LAP3		1	30	30	30	26	27	29	30	30	30	26	30	30	28	29	28	26	27	29	30	30	30	26	30	30	28	29	28	26	27	29	30	30	30	26	30	30	28	29	28	63.6	63.6
P29144	P29144	19	19	19	Tripeptidyl-peptidase 2	TPP2		1	19	19	19	16	16	15	17	17	17	14	18	17	16	17	16	16	16	15	17	17	17	14	18	17	16	17	16	16	16	15	17	17	17	14	18	17	16	17	16	2021-04-25	2021-04-25
P29218	P29218	7	7	7	Inositol monophosphatase 1	IMPA1		1	7	7	7	4	7	6	7	6	4	4	7	6	7	7	7	4	7	6	7	6	4	4	7	6	7	7	7	4	7	6	7	6	4	4	7	6	7	7	7	37.2	37.2
P29350	P29350	16	16	16	Tyrosine-protein phosphatase non-receptor type 6	PTPN6		1	16	16	16	11	13	14	13	13	14	13	14	14	13	13	14	11	13	14	13	13	14	13	14	14	13	13	14	11	13	14	13	13	14	13	14	14	13	13	14	33.8	33.8
P29372	P29372	2	2	2	DNA-3-methyladenine glycosylase	MPG		1	2	2	2	2	2	2	2	1	2	0	0	0	2	2	1	2	2	2	2	1	2	0	0	0	2	2	1	2	2	2	2	1	2	0	0	0	2	2	1	2021-01-09	2021-01-09
P29401	P29401	28	28	28	Transketolase	TKT		1	28	28	28	26	27	24	28	28	28	26	28	28	28	28	28	26	27	24	28	28	28	26	28	28	28	28	28	26	27	24	28	28	28	26	28	28	28	28	28	58.6	58.6
P29466	P29466	9	9	8	Caspase-1;Caspase-1 subunit p20;Caspase-1 subunit p10	CASP1		1	9	9	8	9	9	5	7	8	8	8	9	9	8	8	6	9	9	5	7	8	8	8	9	9	8	8	6	8	8	4	6	7	7	7	8	8	7	7	5	27	27
P29590	P29590	9	9	9	Protein PML	PML		1	9	9	9	7	7	6	6	7	7	7	6	7	9	6	6	7	7	6	6	7	7	7	6	7	9	6	6	7	7	6	6	7	7	7	6	7	9	6	6	2021-09-13	2021-09-13
P29597	P29597	2	2	2	Non-receptor tyrosine-protein kinase TYK2	TYK2		1	2	2	2	2	0	2	2	2	2	1	2	1	2	2	0	2	0	2	2	2	2	1	2	1	2	2	0	2	0	2	2	2	2	1	2	1	2	2	0	2021-04-02	2021-04-02
P29692	P29692	9	9	9	Elongation factor 1-delta	EEF1D		1	9	9	9	9	8	8	9	9	9	8	8	9	9	9	8	9	8	8	9	9	9	8	8	9	9	9	8	9	8	8	9	9	9	8	8	9	9	9	8	34.2	34.2
P29728	P29728	4	4	4	2-5-oligoadenylate synthase 2	OAS2		1	4	4	4	4	4	4	3	4	4	4	4	4	3	3	3	4	4	4	3	4	4	4	4	4	3	3	3	4	4	4	3	4	4	4	4	4	3	3	3	2021-08-05	2021-08-05
P29762;P29373	P29762;P29373	2;1	2;1	2;1	Cellular retinoic acid-binding protein 1;Cellular retinoic acid-binding protein 2	CRABP1;CRABP2	;	2	2	2	2	0	1	2	1	0	1	1	0	1	1	1	1	0	1	2	1	0	1	1	0	1	1	1	1	0	1	2	1	0	1	1	0	1	1	1	1	2021-04-12	2021-04-12
P29966	P29966	2	2	2	Myristoylated alanine-rich C-kinase substrate	MARCKS		1	2	2	2	1	1	2	1	2	2	2	2	2	2	1	1	1	1	2	1	2	2	2	2	2	2	1	1	1	1	2	1	2	2	2	2	2	2	1	1	2021-04-11	2021-04-11
P30038	P30038	2	2	2	Delta-1-pyrroline-5-carboxylate dehydrogenase, mitochondrial	ALDH4A1		1	2	2	2	1	1	2	2	1	1	0	1	1	1	1	2	1	1	2	2	1	1	0	1	1	1	1	2	1	1	2	2	1	1	0	1	1	1	1	2	2021-08-04	2021-08-04
P30040	P30040	16	16	16	Endoplasmic reticulum resident protein 29	ERP29		1	16	16	16	15	14	15	16	16	15	15	16	16	15	16	16	15	14	15	16	16	15	15	16	16	15	16	16	15	14	15	16	16	15	15	16	16	15	16	16	51	51
P30041	P30041	19	19	19	Peroxiredoxin-6	PRDX6		1	19	19	19	16	19	16	19	19	18	15	16	17	19	19	17	16	19	16	19	19	18	15	16	17	19	19	17	16	19	16	19	19	18	15	16	17	19	19	17	78.6	78.6
P30044	P30044	12	12	12	Peroxiredoxin-5, mitochondrial	PRDX5		1	12	12	12	10	12	12	12	12	11	11	12	12	12	12	11	10	12	12	12	12	11	11	12	12	12	12	11	10	12	12	12	12	11	11	12	12	12	12	11	57	57
P30048	P30048	12	12	12	Thioredoxin-dependent peroxide reductase, mitochondrial	PRDX3		1	12	12	12	10	11	10	12	10	11	11	11	9	9	11	10	10	11	10	12	10	11	11	11	9	9	11	10	10	11	10	12	10	11	11	11	9	9	11	10	57	57
P30049	P30049	5	5	5	ATP synthase subunit delta, mitochondrial	ATP5D		1	5	5	5	4	5	5	5	5	5	3	5	5	4	5	5	4	5	5	5	5	5	3	5	5	4	5	5	4	5	5	5	5	5	3	5	5	4	5	5	2021-02-20	2021-02-20
P30050	P30050	10	10	10	60S ribosomal protein L12	RPL12		1	10	10	10	10	9	9	10	10	10	10	10	10	9	10	10	10	9	9	10	10	10	10	10	10	9	10	10	10	9	9	10	10	10	10	10	10	9	10	10	63.6	63.6
P30084	P30084	11	11	11	Enoyl-CoA hydratase, mitochondrial	ECHS1		1	11	11	11	8	9	9	11	9	8	9	9	8	8	9	7	8	9	9	11	9	8	9	9	8	8	9	7	8	9	9	11	9	8	9	9	8	8	9	7	50	50
P30085	P30085	14	14	14	UMP-CMP kinase	CMPK1		1	14	14	14	12	13	13	13	13	12	13	13	13	13	12	13	12	13	13	13	13	12	13	13	13	13	12	13	12	13	13	13	13	12	13	13	13	13	12	13	71.4	71.4
P30086	P30086	12	12	12	Phosphatidylethanolamine-binding protein 1;Hippocampal cholinergic neurostimulating peptide	PEBP1		1	12	12	12	8	11	11	12	10	9	9	10	10	11	11	11	8	11	11	12	10	9	9	10	10	11	11	11	8	11	11	12	10	9	9	10	10	11	11	11	86.6	86.6
P30101	P30101	37	37	37	Protein disulfide-isomerase A3	PDIA3		1	37	37	37	33	37	35	36	35	36	37	37	35	37	36	33	33	37	35	36	35	36	37	37	35	37	36	33	33	37	35	36	35	36	37	37	35	37	36	33	64	64
P30153;P30154	P30153	21;4	21;4	21;4	Serine/threonine-protein phosphatase 2A 65 kDa regulatory subunit A alpha isoform	PPP2R1A		2	21	21	21	15	16	14	20	17	18	16	18	17	18	19	15	15	16	14	20	17	18	16	18	17	18	19	15	15	16	14	20	17	18	16	18	17	18	19	15	39.2	39.2
P30273	P30273	4	4	4	High affinity immunoglobulin epsilon receptor subunit gamma	FCER1G		1	4	4	4	4	4	4	4	3	4	3	4	4	4	3	4	4	4	4	4	3	4	3	4	4	4	3	4	4	4	4	4	3	4	3	4	4	4	3	4	39.5	39.5
P30405	P30405	10	10	9	Peptidyl-prolyl cis-trans isomerase F, mitochondrial	PPIF		1	10	10	9	9	10	9	10	9	10	10	10	10	9	9	9	9	10	9	10	9	10	10	10	10	9	9	9	8	9	8	9	8	9	9	9	9	8	8	8	46.9	46.9
P30419	P30419	3	3	3	Glycylpeptide N-tetradecanoyltransferase 1	NMT1		1	3	3	3	2	2	3	3	3	3	1	3	3	2	2	3	2	2	3	3	3	3	1	3	3	2	2	3	2	2	3	3	3	3	1	3	3	2	2	3	2021-03-07	2021-03-07
P30519	P30519	5	5	5	Heme oxygenase 2	HMOX2		1	5	5	5	2	3	3	4	4	3	2	5	3	5	3	4	2	3	3	4	4	3	2	5	3	5	3	4	2	3	3	4	4	3	2	5	3	5	3	4	2021-03-20	2021-03-20
P30520	P30520	4	4	4	Adenylosuccinate synthetase isozyme 2	ADSS		1	4	4	4	2	3	3	3	2	3	1	3	2	2	2	2	2	3	3	3	2	3	1	3	2	2	2	2	2	3	3	3	2	3	1	3	2	2	2	2	2021-01-12	2021-01-12
P30533	P30533	5	5	5	Alpha-2-macroglobulin receptor-associated protein	LRPAP1		1	5	5	5	2	3	3	5	3	3	3	3	3	4	2	4	2	3	3	5	3	3	3	3	3	4	2	4	2	3	3	5	3	3	3	3	3	4	2	4	14	14
P30536	P30536	2	2	2	Translocator protein	TSPO		1	2	2	2	2	2	2	2	2	1	2	1	2	2	2	0	2	2	2	2	2	1	2	1	2	2	2	0	2	2	2	2	2	1	2	1	2	2	2	0	2021-03-18	2021-03-18
P30566	P30566	7	7	7	Adenylosuccinate lyase	ADSL		1	7	7	7	7	5	6	5	7	7	5	7	7	7	7	7	7	5	6	5	7	7	5	7	7	7	7	7	7	5	6	5	7	7	5	7	7	7	7	7	2021-02-26	2021-02-26
P30622	P30622	2	2	2	CAP-Gly domain-containing linker protein 1	CLIP1		1	2	2	2	2	2	1	1	2	1	2	2	1	2	2	2	2	2	1	1	2	1	2	2	1	2	2	2	2	2	1	1	2	1	2	2	1	2	2	2	2021-05-01	2021-05-01
P30626	P30626	2	2	2	Sorcin	SRI		1	2	2	2	1	1	2	2	2	2	2	2	2	2	2	2	1	1	2	2	2	2	2	2	2	2	2	2	1	1	2	2	2	2	2	2	2	2	2	2	2021-06-11	2021-06-11
P30740;O75830	P30740	8;1	8;1	7;0	Leukocyte elastase inhibitor	SERPINB1		2	8	8	7	5	5	4	8	8	7	3	7	7	8	7	7	5	5	4	8	8	7	3	7	7	8	7	7	5	4	3	7	7	6	3	6	6	7	6	6	2021-03-30	2021-03-30
P30837	P30837	2	2	2	Aldehyde dehydrogenase X, mitochondrial	ALDH1B1		1	2	2	2	1	1	1	1	2	2	2	2	1	1	2	1	1	1	1	1	2	2	2	2	1	1	2	1	1	1	1	1	2	2	2	2	1	1	2	1	2021-02-05	2021-02-05
P30876	P30876	8	8	8	DNA-directed RNA polymerase II subunit RPB2	POLR2B		1	8	8	8	6	7	7	7	8	8	4	7	4	8	7	8	6	7	7	7	8	8	4	7	4	8	7	8	6	7	7	7	8	8	4	7	4	8	7	8	9	9
P31040	P31040	14	14	14	Succinate dehydrogenase [ubiquinone] flavoprotein subunit, mitochondrial	SDHA		1	14	14	14	10	11	9	11	13	11	10	12	11	12	11	11	10	11	9	11	13	11	10	12	11	12	11	11	10	11	9	11	13	11	10	12	11	12	11	11	2021-08-29	2021-08-29
P31146	P31146	28	28	28	Coronin-1A	CORO1A		1	28	28	28	26	28	26	26	26	26	26	27	27	25	26	26	26	28	26	26	26	26	26	27	27	25	26	26	26	28	26	26	26	26	26	27	27	25	26	26	47.1	47.1
P31150	P31150	11	5	5	Rab GDP dissociation inhibitor alpha	GDI1		1	11	5	5	10	8	7	11	10	10	11	10	11	9	11	7	5	4	4	5	5	5	5	5	5	4	5	3	5	4	4	5	5	5	5	5	5	4	5	3	35.6	2021-06-20
P31153;Q00266	P31153	12;1	12;1	12;1	S-adenosylmethionine synthase isoform type-2	MAT2A		2	12	12	12	10	11	11	11	12	11	12	11	10	11	10	11	10	11	11	11	12	11	12	11	10	11	10	11	10	11	11	11	12	11	12	11	10	11	10	11	2021-04-29	2021-04-29
P31689	P31689	8	8	8	DnaJ homolog subfamily A member 1	DNAJA1		1	8	8	8	2	4	3	4	7	4	3	4	5	4	6	3	2	4	3	4	7	4	3	4	5	4	6	3	2	4	3	4	7	4	3	4	5	4	6	3	30.2	30.2
P31930	P31930	21	21	20	Cytochrome b-c1 complex subunit 1, mitochondrial	UQCRC1		1	21	21	20	19	20	17	21	17	20	17	20	18	20	21	19	19	20	17	21	17	20	17	20	18	20	21	19	18	19	16	20	16	19	16	19	17	19	20	18	56.9	56.9
P31937	P31937	2	2	2	3-hydroxyisobutyrate dehydrogenase, mitochondrial	HIBADH		1	2	2	2	2	2	2	2	2	2	1	2	2	2	2	2	2	2	2	2	2	2	1	2	2	2	2	2	2	2	2	2	2	2	1	2	2	2	2	2	14	14
P31939	P31939	27	27	27	Bifunctional purine biosynthesis protein PURH;Phosphoribosylaminoimidazolecarboxamide formyltransferase;IMP cyclohydrolase	ATIC		1	27	27	27	24	26	23	24	26	26	24	25	25	25	27	27	24	26	23	24	26	26	24	25	25	25	27	27	24	26	23	24	26	26	24	25	25	25	27	27	61.3	61.3
P31942	P31942	6	6	6	Heterogeneous nuclear ribonucleoprotein H3	HNRNPH3		1	6	6	6	6	5	4	5	5	5	4	6	4	6	6	4	6	5	4	5	5	5	4	6	4	6	6	4	6	5	4	5	5	5	4	6	4	6	6	4	2021-03-22	2021-03-22
P31943	P31943	14	14	8	Heterogeneous nuclear ribonucleoprotein H;Heterogeneous nuclear ribonucleoprotein H, N-terminally processed	HNRNPH1		1	14	14	8	12	12	13	13	12	13	10	14	12	13	12	12	12	12	13	13	12	13	10	14	12	13	12	12	7	6	7	7	7	7	5	8	6	7	7	6	44.8	44.8
P31946	P31946	22	15	13	14-3-3 protein beta/alpha;14-3-3 protein beta/alpha, N-terminally processed	YWHAB		1	22	15	13	20	17	17	20	18	21	18	19	20	18	17	16	14	13	13	15	12	14	13	14	13	14	13	11	12	12	11	13	10	12	11	12	11	12	12	10	70.7	52
P31947	P31947	4	1	1	14-3-3 protein sigma	SFN		1	4	1	1	4	4	4	4	4	4	4	4	4	4	4	4	1	1	1	1	1	1	1	1	1	1	1	1	1	1	1	1	1	1	1	1	1	1	1	1	2021-03-13	2021-02-03
P31948	P31948	24	24	24	Stress-induced-phosphoprotein 1	STIP1		1	24	24	24	20	21	21	22	23	23	23	22	22	23	22	20	20	21	21	22	23	23	23	22	22	23	22	20	20	21	21	22	23	23	23	22	22	23	22	20	48.3	48.3
P31949	P31949	8	8	8	Protein S100-A11;Protein S100-A11, N-terminally processed	S100A11		1	8	8	8	8	8	8	8	8	8	8	8	8	8	8	8	8	8	8	8	8	8	8	8	8	8	8	8	8	8	8	8	8	8	8	8	8	8	8	8	56.2	56.2
P32119	P32119	15	14	14	Peroxiredoxin-2	PRDX2		1	15	14	14	15	14	12	15	15	15	15	14	15	15	15	15	14	13	11	14	14	14	14	13	14	14	14	14	14	13	11	14	14	14	14	13	14	14	14	14	49	43.4
P32189;Q14409	P32189;Q14409	2;1	2;1	2;1	Glycerol kinase;Putative glycerol kinase 3	GK;GK3P	;	2	2	2	2	1	2	2	1	2	1	2	2	2	1	1	2	1	2	2	1	2	1	2	2	2	1	1	2	1	2	2	1	2	1	2	2	2	1	1	2	2021-09-03	2021-09-03
P32242	P32242	1	1	1	Homeobox protein OTX1	OTX1		1	1	1	1	1	1	1	1	1	1	1	1	1	1	1	1	1	1	1	1	1	1	1	1	1	1	1	1	1	1	1	1	1	1	1	1	1	1	1	1	2021-04-03	2021-04-03
P32321	P32321	2	2	2	Deoxycytidylate deaminase	DCTD		1	2	2	2	1	2	1	1	2	2	1	2	2	2	2	2	1	2	1	1	2	2	1	2	2	2	2	2	1	2	1	1	2	2	1	2	2	2	2	2	2021-05-18	2021-05-18
P32456;P32455	P32456;P32455	2;2	2;2	2;2	Interferon-induced guanylate-binding protein 2;Interferon-induced guanylate-binding protein 1	GBP2;GBP1	;	2	2	2	2	1	1	1	1	1	1	1	1	2	1	1	1	1	1	1	1	1	1	1	1	2	1	1	1	1	1	1	1	1	1	1	1	2	1	1	1	2021-04-05	2021-04-05
P32519	P32519	3	3	3	ETS-related transcription factor Elf-1	ELF1		1	3	3	3	2	3	3	3	3	2	1	2	2	3	3	3	2	3	3	3	3	2	1	2	2	3	3	3	2	3	3	3	3	2	1	2	2	3	3	3	2021-08-10	2021-08-10
P32969	P32969	14	14	14	60S ribosomal protein L9	RPL9		1	14	14	14	13	11	12	12	12	12	13	13	11	12	14	12	13	11	12	12	12	12	13	13	11	12	14	12	13	11	12	12	12	12	13	13	11	12	14	12	68.8	68.8
P32970	P32970	2	2	2	CD70 antigen	CD70		1	2	2	2	1	1	2	2	1	2	1	2	1	2	2	1	1	1	2	2	1	2	1	2	1	2	2	1	1	1	2	2	1	2	1	2	1	2	2	1	13	13
P33121	P33121	8	8	8	Long-chain-fatty-acid--CoA ligase 1	ACSL1		1	8	8	8	8	8	8	8	8	8	8	8	8	8	8	8	8	8	8	8	8	8	8	8	8	8	8	8	8	8	8	8	8	8	8	8	8	8	8	8	2021-03-19	2021-03-19
P33176;O60282;Q12840	P33176	19;5;5	19;5;5	19;5;5	Kinesin-1 heavy chain	KIF5B		3	19	19	19	16	18	13	17	18	18	16	18	17	17	18	17	16	18	13	17	18	18	16	18	17	17	18	17	16	18	13	17	18	18	16	18	17	17	18	17	29	29
P33240;Q9H0L4	P33240;Q9H0L4	3;2	3;2	3;2	Cleavage stimulation factor subunit 2;Cleavage stimulation factor subunit 2 tau variant	CSTF2;CSTF2T	;	2	3	3	3	3	3	3	3	3	3	2	3	3	3	3	3	3	3	3	3	3	3	2	3	3	3	3	3	3	3	3	3	3	3	2	3	3	3	3	3	2021-02-06	2021-02-06
P33316	P33316	5	5	5	Deoxyuridine 5-triphosphate nucleotidohydrolase, mitochondrial	DUT		1	5	5	5	3	4	5	5	3	3	2	5	3	5	5	5	3	4	5	5	3	3	2	5	3	5	5	5	3	4	5	5	3	3	2	5	3	5	5	5	2021-04-23	2021-04-23
P33527	P33527	2	2	2	Multidrug resistance-associated protein 1	ABCC1		1	2	2	2	1	0	0	1	2	1	0	1	0	0	0	0	1	0	0	1	2	1	0	1	0	0	0	0	1	0	0	1	2	1	0	1	0	0	0	0	2021-09-02	2021-09-02
P33897	P33897	6	6	6	ATP-binding cassette sub-family D member 1	ABCD1		1	6	6	6	5	4	6	5	5	5	2	3	5	4	3	3	5	4	6	5	5	5	2	3	5	4	3	3	5	4	6	5	5	5	2	3	5	4	3	3	2021-08-11	2021-08-11
P33908	P33908	1	1	1	Mannosyl-oligosaccharide 1,2-alpha-mannosidase IA	MAN1A1		1	1	1	1	1	1	1	1	1	1	1	1	1	1	1	1	1	1	1	1	1	1	1	1	1	1	1	1	1	1	1	1	1	1	1	1	1	1	1	1	2021-01-04	2021-01-04
P33991;Q9UJA3	P33991	11;1	11;1	11;1	DNA replication licensing factor MCM4	MCM4		2	11	11	11	5	10	6	8	6	6	6	4	5	10	10	8	5	10	6	8	6	6	6	4	5	10	10	8	5	10	6	8	6	6	6	4	5	10	10	8	2021-06-17	2021-06-17
P33992	P33992	8	8	8	DNA replication licensing factor MCM5	MCM5		1	8	8	8	5	7	7	7	6	6	1	6	3	6	8	7	5	7	7	7	6	6	1	6	3	6	8	7	5	7	7	7	6	6	1	6	3	6	8	7	2021-09-15	2021-09-15
P33993	P33993	11	11	11	DNA replication licensing factor MCM7	MCM7		1	11	11	11	10	11	10	10	9	9	9	9	8	9	9	10	10	11	10	10	9	9	9	9	8	9	9	10	10	11	10	10	9	9	9	9	8	9	9	10	2021-07-22	2021-07-22
P34059	P34059	1	1	1	N-acetylgalactosamine-6-sulfatase	GALNS		1	1	1	1	0	1	1	1	1	1	1	1	1	1	1	1	0	1	1	1	1	1	1	1	1	1	1	1	0	1	1	1	1	1	1	1	1	1	1	1	2021-08-04	2021-08-04
P34741	P34741	2	2	2	Syndecan-2	SDC2		1	2	2	2	2	1	2	2	2	2	2	2	2	2	2	2	2	1	2	2	2	2	2	2	2	2	2	2	2	1	2	2	2	2	2	2	2	2	2	2	2021-04-11	2021-04-11
Q7Z5Y6;P34820	Q7Z5Y6;P34820	2;2	2;2	2;2	Bone morphogenetic protein 8A;Bone morphogenetic protein 8B	BMP8A;BMP8B	;	2	2	2	2	1	2	2	2	1	1	2	2	1	2	1	1	1	2	2	2	1	1	2	2	1	2	1	1	1	2	2	2	1	1	2	2	1	2	1	1	2021-02-09	2021-02-09
P34897	P34897	25	25	24	Serine hydroxymethyltransferase, mitochondrial	SHMT2		1	25	25	24	17	22	18	22	20	21	14	21	20	22	22	22	17	22	18	22	20	21	14	21	20	22	22	22	17	21	17	21	19	20	13	20	19	21	21	21	55.4	55.4
P34910	P34910	6	6	6	Protein EVI2B	EVI2B		1	6	6	6	5	5	4	5	4	5	3	4	5	5	5	3	5	5	4	5	4	5	3	4	5	5	5	3	5	5	4	5	4	5	3	4	5	5	5	3	15	15
P34932;O95757	P34932	35;2	35;2	32;0	Heat shock 70 kDa protein 4	HSPA4		2	35	35	32	28	27	26	31	31	31	28	32	29	31	33	27	28	27	26	31	31	31	28	32	29	31	33	27	25	25	24	28	28	28	25	29	27	29	30	25	51.4	51.4
P34949	P34949	2	2	2	Mannose-6-phosphate isomerase	MPI		1	2	2	2	1	1	2	1	2	2	2	1	2	1	1	1	1	1	2	1	2	2	2	1	2	1	1	1	1	1	2	1	2	2	2	1	2	1	1	1	2021-09-09	2021-09-09
P35030	P35030	1	1	1	Trypsin-3	PRSS3		1	1	1	1	1	0	1	1	1	1	0	0	1	1	0	1	1	0	1	1	1	1	0	0	1	1	0	1	1	0	1	1	1	1	0	0	1	1	0	1	2021-03-04	2021-03-04
P35221	P35221	2	2	2	Catenin alpha-1	CTNNA1		1	2	2	2	1	1	1	1	1	1	0	1	1	2	0	0	1	1	1	1	1	1	0	1	1	2	0	0	1	1	1	1	1	1	0	1	1	2	0	0	2021-06-02	2021-06-02
P35232	P35232	15	15	15	Prohibitin	PHB		1	15	15	15	14	15	15	15	15	15	14	15	15	14	15	15	14	15	15	15	15	15	14	15	15	14	15	15	14	15	15	15	15	15	14	15	15	14	15	15	60.3	60.3
P35236	P35236	1	1	1	Tyrosine-protein phosphatase non-receptor type 7	PTPN7		1	1	1	1	0	0	1	1	0	0	0	1	0	1	0	1	0	0	1	1	0	0	0	1	0	1	0	1	0	0	1	1	0	0	0	1	0	1	0	1	2021-04-04	2021-04-04
P35237	P35237	3	3	3	Serpin B6	SERPINB6		1	3	3	3	2	2	1	2	3	2	1	3	3	2	1	2	2	2	1	2	3	2	1	3	3	2	1	2	2	2	1	2	3	2	1	3	3	2	1	2	2021-04-11	2021-04-11
P35241	P35241	18	4	4	Radixin	RDX		1	18	4	4	16	17	14	18	17	17	16	17	15	18	18	17	4	4	3	4	4	4	4	3	3	4	4	3	4	4	3	4	4	4	4	3	3	4	4	3	28	2021-04-08
P35244	P35244	3	3	3	Replication protein A 14 kDa subunit	RPA3		1	3	3	3	2	3	3	2	2	3	3	2	2	3	3	2	2	3	3	2	2	3	3	2	2	3	3	2	2	3	3	2	2	3	3	2	2	3	3	2	32.2	32.2
P35249	P35249	2	2	2	Replication factor C subunit 4	RFC4		1	2	2	2	1	2	1	2	2	0	1	1	2	2	2	2	1	2	1	2	2	0	1	1	2	2	2	2	1	2	1	2	2	0	1	1	2	2	2	2	2021-05-08	2021-05-08
P35250	P35250	2	2	2	Replication factor C subunit 2	RFC2		1	2	2	2	2	1	2	1	2	1	1	1	1	2	1	1	2	1	2	1	2	1	1	1	1	2	1	1	2	1	2	1	2	1	1	1	1	2	1	1	2021-06-07	2021-06-07
P35251	P35251	1	1	1	Replication factor C subunit 1	RFC1		1	1	1	1	0	1	1	1	1	1	0	0	1	1	1	1	0	1	1	1	1	1	0	0	1	1	1	1	0	1	1	1	1	1	0	0	1	1	1	1	1	1
P35268	P35268	4	4	4	60S ribosomal protein L22	RPL22		1	4	4	4	3	4	3	4	4	3	4	4	4	4	4	4	3	4	3	4	4	3	4	4	4	4	4	4	3	4	3	4	4	3	4	4	4	4	4	4	51.6	51.6
P35270	P35270	9	9	9	Sepiapterin reductase	SPR		1	9	9	9	4	8	6	6	4	6	5	6	6	7	7	6	4	8	6	6	4	6	5	6	6	7	7	6	4	8	6	6	4	6	5	6	6	7	7	6	47.5	47.5
P35573	P35573	5	5	5	Glycogen debranching enzyme;4-alpha-glucanotransferase;Amylo-alpha-1,6-glucosidase	AGL		1	5	5	5	4	3	3	3	4	4	4	4	4	4	4	3	4	3	3	3	4	4	4	4	4	4	4	3	4	3	3	3	4	4	4	4	4	4	4	3	2021-08-04	2021-08-04
P35579;P35580;P35749;Q7Z406;REV__Q9UKV3	P35579	177;16;15;7;1	177;16;15;7;1	177;16;15;7;1	Myosin-9	MYH9		5	177	177	177	132	154	148	157	147	150	145	163	156	159	157	144	132	154	148	157	147	150	145	163	156	159	157	144	132	154	148	157	147	150	145	163	156	159	157	144	66.2	66.2
P35606	P35606	12	12	12	Coatomer subunit beta	COPB2		1	12	12	12	11	9	7	8	10	11	10	10	11	10	11	10	11	9	7	8	10	11	10	10	11	10	11	10	11	9	7	8	10	11	10	10	11	10	11	10	2021-09-21	2021-09-21
P35613	P35613	7	7	7	Basigin	BSG		1	7	7	7	7	7	7	7	7	7	7	7	7	7	6	6	7	7	7	7	7	7	7	7	7	7	6	6	7	7	7	7	7	7	7	7	7	7	6	6	2021-08-21	2021-08-21
P35637	P35637	5	5	4	RNA-binding protein FUS	FUS		1	5	5	4	3	5	4	4	5	4	4	5	3	5	4	4	3	5	4	4	5	4	4	5	3	5	4	4	3	4	3	3	4	3	3	4	3	4	3	3	2021-09-13	2021-09-13
P35658	P35658	2	2	2	Nuclear pore complex protein Nup214	NUP214		1	2	2	2	1	2	1	2	2	2	2	2	2	1	2	2	1	2	1	2	2	2	2	2	2	1	2	2	1	2	1	2	2	2	2	2	2	1	2	2	2021-08-01	2021-08-01
P35659	P35659	3	3	3	Protein DEK	DEK		1	3	3	3	1	1	3	2	2	2	0	2	1	2	2	2	1	1	3	2	2	2	0	2	1	2	2	2	1	1	3	2	2	2	0	2	1	2	2	2	2021-03-09	2021-03-09
P35754	P35754	3	3	3	Glutaredoxin-1	GLRX		1	3	3	3	1	3	2	3	2	2	2	2	2	3	3	3	1	3	2	3	2	2	2	2	2	3	3	3	1	3	2	3	2	2	2	2	2	3	3	3	2021-06-23	2021-06-23
P35914	P35914	5	5	5	Hydroxymethylglutaryl-CoA lyase, mitochondrial	HMGCL		1	5	5	5	2	4	3	4	4	5	4	4	3	3	4	3	2	4	3	4	4	5	4	4	3	3	4	3	2	4	3	4	4	5	4	4	3	3	4	3	2021-03-24	2021-03-24
P35998	P35998	18	18	18	26S protease regulatory subunit 7	PSMC2		1	18	18	18	15	15	13	17	14	16	14	16	16	15	15	16	15	15	13	17	14	16	14	16	16	15	15	16	15	15	13	17	14	16	14	16	16	15	15	16	60	60
P36222	P36222	10	10	10	Chitinase-3-like protein 1	CHI3L1		1	10	10	10	9	9	9	7	10	8	9	8	9	9	9	9	9	9	9	7	10	8	9	8	9	9	9	9	9	9	9	7	10	8	9	8	9	9	9	9	35.2	35.2
P36405	P36405	1	1	1	ADP-ribosylation factor-like protein 3	ARL3		1	1	1	1	0	0	0	1	1	1	1	1	1	1	0	1	0	0	0	1	1	1	1	1	1	1	0	1	0	0	0	1	1	1	1	1	1	1	0	1	2021-04-10	2021-04-10
P36507	P36507	4	1	1	Dual specificity mitogen-activated protein kinase kinase 2	MAP2K2		1	4	1	1	3	2	2	3	2	4	3	3	3	2	3	2	0	0	0	0	0	1	0	1	0	0	0	0	0	0	0	0	0	1	0	1	0	0	0	0	2021-05-16	2021-08-08
P36542	P36542	14	14	14	ATP synthase subunit gamma, mitochondrial	ATP5C1		1	14	14	14	11	10	9	11	11	14	11	11	10	11	12	11	11	10	9	11	11	14	11	11	10	11	12	11	11	10	9	11	11	14	11	11	10	11	12	11	46	46
P36543;Q96A05	P36543	12;2	12;2	12;2	V-type proton ATPase subunit E 1	ATP6V1E1		2	12	12	12	10	11	11	11	11	11	10	12	11	11	11	11	10	11	11	11	11	11	10	12	11	11	11	11	10	11	11	11	11	11	10	12	11	11	11	11	38.1	38.1
P36551	P36551	3	3	3	Oxygen-dependent coproporphyrinogen-III oxidase, mitochondrial	CPOX		1	3	3	3	2	2	1	3	1	1	1	2	2	2	2	2	2	2	1	3	1	1	1	2	2	2	2	2	2	2	1	3	1	1	1	2	2	2	2	2	2021-05-07	2021-05-07
P36578	P36578	19	19	19	60S ribosomal protein L4	RPL4		1	19	19	19	17	18	17	18	16	17	15	19	16	17	17	16	17	18	17	18	16	17	15	19	16	17	17	16	17	18	17	18	16	17	15	19	16	17	17	16	42.2	42.2
P36776	P36776	17	17	17	Lon protease homolog, mitochondrial	LONP1		1	17	17	17	12	16	10	13	13	14	13	13	14	16	15	15	12	16	10	13	13	14	13	13	14	16	15	15	12	16	10	13	13	14	13	13	14	16	15	15	2021-07-26	2021-07-26
P36873	P36873	11	2	2	Serine/threonine-protein phosphatase PP1-gamma catalytic subunit	PPP1CC		1	11	2	2	9	9	9	9	9	9	8	9	9	10	9	8	2	2	2	2	2	2	2	2	2	2	2	2	2	2	2	2	2	2	2	2	2	2	2	2	40.2	2021-04-07
P36954	P36954	1	1	1	DNA-directed RNA polymerase II subunit RPB9	POLR2I		1	1	1	1	1	1	0	1	1	1	1	0	1	1	1	1	1	1	0	1	1	1	1	0	1	1	1	1	1	1	0	1	1	1	1	0	1	1	1	1	2021-04-18	2021-04-18
P36957;WP_010883020.1;HPPMICFE_00209	P36957	8;1;1	8;1;1	8;1;1	Dihydrolipoyllysine-residue succinyltransferase component of 2-oxoglutarate dehydrogenase complex, mitochondrial	DLST		3	8	8	8	8	8	7	8	8	8	6	8	8	8	8	7	8	8	7	8	8	8	6	8	8	8	8	7	8	8	7	8	8	8	6	8	8	8	8	7	2021-02-23	2021-02-23
P36969	P36969	3	3	3	Phospholipid hydroperoxide glutathione peroxidase, mitochondrial	GPX4		1	3	3	3	3	3	1	3	2	3	3	3	3	3	3	3	3	3	1	3	2	3	3	3	3	3	3	3	3	3	1	3	2	3	3	3	3	3	3	3	2021-03-21	2021-03-21
P37108	P37108	13	13	13	Signal recognition particle 14 kDa protein	SRP14		1	13	13	13	11	12	11	13	9	10	8	11	10	11	12	12	11	12	11	13	9	10	8	11	10	11	12	12	11	12	11	13	9	10	8	11	10	11	12	12	74.3	74.3
P37198	P37198	3	3	3	Nuclear pore glycoprotein p62	NUP62		1	3	3	3	2	3	3	3	2	2	2	2	3	2	3	2	2	3	3	3	2	2	2	2	3	2	3	2	2	3	3	3	2	2	2	2	3	2	3	2	2021-02-10	2021-02-10
P37235;P84074;P61601	P37235;P84074	4;3;1	4;3;1	4;3;1	Hippocalcin-like protein 1;Neuron-specific calcium-binding protein hippocalcin	HPCAL1;HPCA	;	3	4	4	4	4	4	4	4	4	4	4	4	4	4	4	4	4	4	4	4	4	4	4	4	4	4	4	4	4	4	4	4	4	4	4	4	4	4	4	4	2021-02-20	2021-02-20
P37802;Q9UI15	P37802	25;1	25;1	25;1	Transgelin-2	TAGLN2		2	25	25	25	22	24	20	22	23	21	23	23	22	23	22	20	22	24	20	22	23	21	23	23	22	23	22	20	22	24	20	22	23	21	23	23	22	23	22	20	87.9	87.9
P37837	P37837	17	17	17	Transaldolase	TALDO1		1	17	17	17	15	15	15	14	14	16	15	16	16	15	16	15	15	15	15	14	14	16	15	16	16	15	16	15	15	15	15	14	14	16	15	16	16	15	16	15	40.9	40.9
P38117	P38117	17	17	17	Electron transfer flavoprotein subunit beta	ETFB		1	17	17	17	15	16	15	16	15	15	15	16	15	15	16	14	15	16	15	16	15	15	15	16	15	15	16	14	15	16	15	16	15	15	15	16	15	15	16	14	60.8	60.8
P38159;Q96E39;O75526;Q8N7X1	P38159;Q96E39	18;11;4;1	18;11;4;1	18;11;4;1	RNA-binding motif protein, X chromosome;RNA-binding motif protein, X chromosome, N-terminally processed;RNA binding motif protein, X-linked-like-1	RBMX;RBMXL1	;	4	18	18	18	14	17	15	13	11	14	14	16	12	17	16	17	14	17	15	13	11	14	14	16	12	17	16	17	14	17	15	13	11	14	14	16	12	17	16	17	41.9	41.9
P38606	P38606	21	21	21	V-type proton ATPase catalytic subunit A	ATP6V1A		1	21	21	21	19	19	16	20	20	19	16	19	20	20	19	20	19	19	16	20	20	19	16	19	20	20	19	20	19	19	16	20	20	19	16	19	20	20	19	20	52.7	52.7
P38646	P38646	36	36	36	Stress-70 protein, mitochondrial	HSPA9		1	36	36	36	30	35	32	34	31	31	30	34	29	32	33	32	30	35	32	34	31	31	30	34	29	32	33	32	30	35	32	34	31	31	30	34	29	32	33	32	56	56
P38919	P38919	18	18	16	Eukaryotic initiation factor 4A-III;Eukaryotic initiation factor 4A-III, N-terminally processed	EIF4A3		1	18	18	16	15	15	10	16	16	16	15	16	13	15	16	13	15	15	10	16	16	16	15	16	13	15	16	13	13	13	8	14	14	14	13	14	11	13	14	11	55.5	55.5
P39019	P39019	10	10	10	40S ribosomal protein S19	RPS19		1	10	10	10	8	9	8	9	9	9	7	8	9	8	9	10	8	9	8	9	9	9	7	8	9	8	9	10	8	9	8	9	9	9	7	8	9	8	9	10	52.4	52.4
P39023;Q92901	P39023	18;3	18;3	18;3	60S ribosomal protein L3	RPL3		2	18	18	18	17	14	13	16	18	17	15	17	18	17	16	17	17	14	13	16	18	17	15	17	18	17	16	17	17	14	13	16	18	17	15	17	18	17	16	17	39.5	39.5
P39210	P39210	1	1	1	Protein Mpv17	MPV17		1	1	1	1	0	1	0	1	0	1	1	1	1	1	1	1	0	1	0	1	0	1	1	1	1	1	1	1	0	1	0	1	0	1	1	1	1	1	1	1	2021-06-13	2021-06-13
P39656	P39656	10	10	10	Dolichyl-diphosphooligosaccharide--protein glycosyltransferase 48 kDa subunit	DDOST		1	10	10	10	10	10	10	10	10	10	10	10	10	10	10	10	10	10	10	10	10	10	10	10	10	10	10	10	10	10	10	10	10	10	10	10	10	10	10	10	32.5	32.5
P39687;O43423	P39687	8;1	8;1	6;1	Acidic leucine-rich nuclear phosphoprotein 32 family member A	ANP32A		2	8	8	6	4	7	7	6	7	7	5	3	5	5	5	6	4	7	7	6	7	7	5	3	5	5	5	6	3	6	5	4	6	6	5	3	5	5	5	5	35.3	35.3
P39748	P39748	4	4	4	Flap endonuclease 1	FEN1		1	4	4	4	3	3	2	3	3	3	3	3	4	3	3	4	3	3	2	3	3	3	3	3	4	3	3	4	3	3	2	3	3	3	3	3	4	3	3	4	2021-07-14	2021-07-14
Q13948;P39880	Q13948;P39880	3;3	3;3	3;3	Protein CASP;Homeobox protein cut-like 1	CUX1	;	2	3	3	3	2	2	1	2	3	2	1	3	3	2	3	3	2	2	1	2	3	2	1	3	3	2	3	3	2	2	1	2	3	2	1	3	3	2	3	3	2021-02-07	2021-02-07
P40121	P40121	18	18	18	Macrophage-capping protein	CAPG		1	18	18	18	14	18	15	18	15	17	15	17	17	16	16	15	14	18	15	18	15	17	15	17	17	16	16	15	14	18	15	18	15	17	15	17	17	16	16	15	67.2	67.2
P40222	P40222	2	2	2	Alpha-taxilin	TXLNA		1	2	2	2	1	1	2	2	1	2	2	1	2	2	2	2	1	1	2	2	1	2	2	1	2	2	2	2	1	1	2	2	1	2	2	1	2	2	2	2	2021-09-04	2021-09-04
P40227	P40227	31	31	27	T-complex protein 1 subunit zeta	CCT6A		1	31	31	27	30	28	25	28	29	27	29	30	29	27	29	27	30	28	25	28	29	27	29	30	29	27	29	27	26	24	21	24	26	24	25	26	25	23	25	24	58.2	58.2
P40306	P40306	6	6	6	Proteasome subunit beta type-10	PSMB10		1	6	6	6	5	5	5	6	5	5	5	5	5	5	5	5	5	5	5	6	5	5	5	5	5	5	5	5	5	5	5	6	5	5	5	5	5	5	5	5	39.2	39.2
P40429;Q6NVV1	P40429	10;4	10;4	10;4	60S ribosomal protein L13a	RPL13A		2	10	10	10	10	8	9	10	8	9	9	9	8	9	9	8	10	8	9	10	8	9	9	9	8	9	9	8	10	8	9	10	8	9	9	9	8	9	9	8	37.9	37.9
P40763	P40763	7	7	7	Signal transducer and activator of transcription 3	STAT3		1	7	7	7	5	4	3	7	6	6	6	3	5	6	7	5	5	4	3	7	6	6	6	3	5	6	7	5	5	4	3	7	6	6	6	3	5	6	7	5	2021-06-13	2021-06-13
P40855	P40855	1	1	1	Peroxisomal biogenesis factor 19	PEX19		1	1	1	1	0	1	1	1	1	1	1	1	0	0	1	1	0	1	1	1	1	1	1	1	0	0	1	1	0	1	1	1	1	1	1	1	0	0	1	1	8	8
P40925	P40925	15	15	15	Malate dehydrogenase, cytoplasmic	MDH1		1	15	15	15	14	14	13	15	15	14	14	15	15	15	15	15	14	14	13	15	15	14	14	15	15	15	15	15	14	14	13	15	15	14	14	15	15	15	15	15	44.3	44.3
P40926	P40926	28	28	28	Malate dehydrogenase, mitochondrial	MDH2		1	28	28	28	27	28	28	28	27	27	26	28	28	27	27	28	27	28	28	28	27	27	26	28	28	27	27	28	27	28	28	28	27	27	26	28	28	27	27	28	70.4	70.4
P40938	P40938	1	1	1	Replication factor C subunit 3	RFC3		1	1	1	1	1	1	1	1	0	1	1	1	1	1	1	1	1	1	1	1	0	1	1	1	1	1	1	1	1	1	1	1	0	1	1	1	1	1	1	1	2021-04-03	2021-04-03
P40939	P40939	50	50	50	Trifunctional enzyme subunit alpha, mitochondrial;Long-chain enoyl-CoA hydratase;Long chain 3-hydroxyacyl-CoA dehydrogenase	HADHA		1	50	50	50	42	45	46	46	47	45	44	48	46	47	44	44	42	45	46	46	47	45	44	48	46	47	44	44	42	45	46	46	47	45	44	48	46	47	44	44	70.8	70.8
P41091;Q2VIR3	P41091;Q2VIR3	11;9	11;9	11;9	Eukaryotic translation initiation factor 2 subunit 3;Putative eukaryotic translation initiation factor 2 subunit 3-like protein	EIF2S3;EIF2S3L	;	2	11	11	11	9	8	9	9	8	8	8	7	8	8	9	8	9	8	9	9	8	8	8	7	8	8	9	8	9	8	9	9	8	8	8	7	8	8	9	8	36	36
P41218	P41218	1	1	1	Myeloid cell nuclear differentiation antigen	MNDA		1	1	1	1	1	1	1	1	1	1	1	1	1	1	1	1	1	1	1	1	1	1	1	1	1	1	1	1	1	1	1	1	1	1	1	1	1	1	1	1	2021-09-02	2021-09-02
P41223	P41223	3	3	3	Protein BUD31 homolog	BUD31		1	3	3	3	1	3	3	3	1	3	0	2	2	3	3	3	1	3	3	3	1	3	0	2	2	3	3	3	1	3	3	3	1	3	0	2	2	3	3	3	2021-05-28	2021-05-28
P41226	P41226	6	6	6	Ubiquitin-like modifier-activating enzyme 7	UBA7		1	6	6	6	4	4	5	5	6	3	6	5	5	6	5	5	4	4	5	5	6	3	6	5	5	6	5	5	4	4	5	5	6	3	6	5	5	6	5	5	2021-01-13	2021-01-13
P41227;Q9BSU3	P41227	4;1	4;1	4;1	N-alpha-acetyltransferase 10	NAA10		2	4	4	4	3	4	3	4	3	3	2	3	3	3	3	3	3	4	3	4	3	3	2	3	3	3	3	3	3	4	3	4	3	3	2	3	3	3	3	3	2021-07-24	2021-07-24
P41240;P42679	P41240	10;1	10;1	10;1	Tyrosine-protein kinase CSK	CSK		2	10	10	10	9	9	7	9	9	9	8	9	9	9	10	10	9	9	7	9	9	9	8	9	9	9	10	10	9	9	7	9	9	9	8	9	9	9	10	10	2021-07-28	2021-07-28
P41250	P41250	7	7	7	Glycine--tRNA ligase	GARS		1	7	7	7	5	5	6	6	6	6	6	7	6	6	7	6	5	5	6	6	6	6	6	7	6	6	7	6	5	5	6	6	6	6	6	7	6	6	7	6	2021-07-12	2021-07-12
P41252	P41252	21	21	21	Isoleucine--tRNA ligase, cytoplasmic	IARS		1	21	21	21	13	13	12	14	16	19	13	19	13	19	16	15	13	13	12	14	16	19	13	19	13	19	16	15	13	13	12	14	16	19	13	19	13	19	16	15	2021-02-23	2021-02-23
P41567;O60739	P41567	3;1	3;1	3;1	Eukaryotic translation initiation factor 1	EIF1		2	3	3	3	3	2	2	2	3	3	1	3	3	3	2	3	3	2	2	2	3	3	1	3	3	3	2	3	3	2	2	2	3	3	1	3	3	3	2	3	59.3	59.3
P42025	P42025	7	3	3	Beta-centractin	ACTR1B		1	7	3	3	5	5	5	7	6	7	5	6	7	7	7	5	1	1	1	3	2	3	1	2	3	3	3	1	1	1	1	3	2	3	1	2	3	3	3	1	36.7	2021-01-18
P42126	P42126	4	4	4	Enoyl-CoA delta isomerase 1, mitochondrial	ECI1		1	4	4	4	2	4	2	4	4	3	3	2	3	4	4	3	2	4	2	4	4	3	3	2	3	4	4	3	2	4	2	4	4	3	3	2	3	4	4	3	2021-09-19	2021-09-19
P42166	P42166	15	3	3	Lamina-associated polypeptide 2, isoform alpha;Thymopoietin;Thymopentin	TMPO		1	15	3	3	15	14	12	14	15	13	13	14	13	14	14	14	3	2	2	3	3	2	2	2	3	3	3	2	3	2	2	3	3	2	2	2	3	3	3	2	2021-05-29	2021-08-09
P42167	P42167	19	19	7	Lamina-associated polypeptide 2, isoforms beta/gamma;Thymopoietin;Thymopentin	TMPO		1	19	19	7	18	18	16	18	19	17	18	19	15	18	18	19	18	18	16	18	19	17	18	19	15	18	18	19	6	6	6	7	7	6	7	7	5	7	7	7	53.1	53.1
P42224	P42224	16	16	16	Signal transducer and activator of transcription 1-alpha/beta	STAT1		1	16	16	16	12	13	15	14	14	14	13	14	15	13	11	13	12	13	15	14	14	14	13	14	15	13	11	13	12	13	15	14	14	14	13	14	15	13	11	13	2021-03-30	2021-03-30
P42226	P42226	1	1	1	Signal transducer and activator of transcription 6	STAT6		1	1	1	1	1	1	1	1	1	1	1	1	1	1	1	1	1	1	1	1	1	1	1	1	1	1	1	1	1	1	1	1	1	1	1	1	1	1	1	1	2021-05-01	2021-05-01
P42285	P42285	9	9	9	Superkiller viralicidic activity 2-like 2	SKIV2L2		1	9	9	9	4	5	6	7	5	6	5	5	2	6	6	7	4	5	6	7	5	6	5	5	2	6	6	7	4	5	6	7	5	6	5	5	2	6	6	7	2021-05-13	2021-05-13
P42330	P42330	3	3	2	Aldo-keto reductase family 1 member C3	AKR1C3		1	3	3	2	2	2	2	3	3	3	2	3	3	3	3	3	2	2	2	3	3	3	2	3	3	3	3	3	1	2	1	2	2	2	1	2	2	2	2	2	2021-06-13	2021-06-13
P42331	P42331	3	3	3	Rho GTPase-activating protein 25	ARHGAP25		1	3	3	3	3	3	3	2	3	2	3	3	3	2	2	2	3	3	3	2	3	2	3	3	3	2	2	2	3	3	3	2	3	2	3	3	3	2	2	2	6	6
P42338	P42338	2	2	2	Phosphatidylinositol 4,5-bisphosphate 3-kinase catalytic subunit beta isoform	PIK3CB		1	2	2	2	0	1	2	1	1	1	0	1	2	1	1	1	0	1	2	1	1	1	0	1	2	1	1	1	0	1	2	1	1	1	0	1	2	1	1	1	2021-05-02	2021-05-02
P42345	P42345	4	4	4	Serine/threonine-protein kinase mTOR	MTOR		1	4	4	4	1	3	2	3	2	3	2	2	2	1	2	2	1	3	2	3	2	3	2	2	2	1	2	2	1	3	2	3	2	3	2	2	2	1	2	2	2021-01-02	2021-01-02
P42356	P42356	2	2	2	Phosphatidylinositol 4-kinase alpha	PI4KA		1	2	2	2	1	1	2	2	1	2	1	1	1	2	2	2	1	1	2	2	1	2	1	1	1	2	2	2	1	1	2	2	1	2	1	1	1	2	2	2	2021-08-01	2021-08-01
P42566	P42566	3	3	3	Epidermal growth factor receptor substrate 15	EPS15		1	3	3	3	2	3	2	2	2	3	3	3	3	3	3	3	2	3	2	2	2	3	3	3	3	3	3	3	2	3	2	2	2	3	3	3	3	3	3	3	7	7
P42677;Q71UM5	P42677;Q71UM5	4;2	4;2	4;2	40S ribosomal protein S27;40S ribosomal protein S27-like	RPS27;RPS27L	;	2	4	4	4	4	4	4	4	4	4	4	4	4	4	4	4	4	4	4	4	4	4	4	4	4	4	4	4	4	4	4	4	4	4	4	4	4	4	4	4	45.2	45.2
P42704;Q9NP80	P42704	31;1	31;1	31;1	Leucine-rich PPR motif-containing protein, mitochondrial	LRPPRC		2	31	31	31	23	24	25	22	24	27	22	24	25	27	25	24	23	24	25	22	24	27	22	24	25	27	25	24	23	24	25	22	24	27	22	24	25	27	25	24	25	25
P42765	P42765	10	10	10	3-ketoacyl-CoA thiolase, mitochondrial	ACAA2		1	10	10	10	5	8	4	9	6	8	5	5	5	10	7	9	5	8	4	9	6	8	5	5	5	10	7	9	5	8	4	9	6	8	5	5	5	10	7	9	33.8	33.8
P42766	P42766	5	5	5	60S ribosomal protein L35	RPL35		1	5	5	5	2	4	5	5	4	4	4	5	4	4	5	4	2	4	5	5	4	4	4	5	4	4	5	4	2	4	5	5	4	4	4	5	4	4	5	4	2021-08-22	2021-08-22
P42785	P42785	1	1	1	Lysosomal Pro-X carboxypeptidase	PRCP		1	1	1	1	1	1	1	1	1	1	1	1	1	1	1	1	1	1	1	1	1	1	1	1	1	1	1	1	1	1	1	1	1	1	1	1	1	1	1	1	2021-02-04	2021-02-04
P42898	P42898	3	3	3	Methylenetetrahydrofolate reductase	MTHFR		1	3	3	3	1	2	2	1	2	1	1	2	2	3	3	3	1	2	2	1	2	1	1	2	2	3	3	3	1	2	2	1	2	1	1	2	2	3	3	3	7	7
P43034	P43034	1	1	1	Platelet-activating factor acetylhydrolase IB subunit alpha	PAFAH1B1		1	1	1	1	1	1	0	1	1	1	1	1	1	1	1	1	1	1	0	1	1	1	1	1	1	1	1	1	1	1	0	1	1	1	1	1	1	1	1	1	2021-07-03	2021-07-03
P43155	P43155	1	1	1	Carnitine O-acetyltransferase	CRAT		1	1	1	1	0	0	1	0	0	0	0	1	0	0	1	0	0	0	1	0	0	0	0	1	0	0	1	0	0	0	1	0	0	0	0	1	0	0	1	0	2021-04-02	2021-04-02
P43243	P43243	20	20	20	Matrin-3	MATR3		1	20	20	20	20	17	17	18	18	18	17	19	18	19	18	18	20	17	17	18	18	18	17	19	18	19	18	18	20	17	17	18	18	18	17	19	18	19	18	18	33.6	33.6
P43246	P43246	1	1	1	DNA mismatch repair protein Msh2	MSH2		1	1	1	1	1	1	1	1	1	1	1	1	1	1	1	1	1	1	1	1	1	1	1	1	1	1	1	1	1	1	1	1	1	1	1	1	1	1	1	1	2021-06-02	2021-06-02
P43304	P43304	17	17	17	Glycerol-3-phosphate dehydrogenase, mitochondrial	GPD2		1	17	17	17	14	15	14	14	16	14	13	14	13	14	12	13	14	15	14	14	16	14	13	14	13	14	12	13	14	15	14	14	16	14	13	14	13	14	12	13	2021-08-31	2021-08-31
P43307	P43307	2	2	2	Translocon-associated protein subunit alpha	SSR1		1	2	2	2	2	2	2	2	2	2	2	2	2	2	2	2	2	2	2	2	2	2	2	2	2	2	2	2	2	2	2	2	2	2	2	2	2	2	2	2	8	8
P48448;P43353	P48448;P43353	1;1	1;1	1;1	Aldehyde dehydrogenase family 3 member B2;Aldehyde dehydrogenase family 3 member B1	ALDH3B2;ALDH3B1	;	2	1	1	1	1	1	1	0	1	0	1	1	1	1	1	0	1	1	1	0	1	0	1	1	1	1	1	0	1	1	1	0	1	0	1	1	1	1	1	0	2021-09-02	2021-09-02
P43405	P43405	7	7	7	Tyrosine-protein kinase SYK	SYK		1	7	7	7	7	7	7	7	6	7	4	7	5	7	7	7	7	7	7	7	6	7	4	7	5	7	7	7	7	7	7	7	6	7	4	7	5	7	7	7	18	18
P43487	P43487	8	8	8	Ran-specific GTPase-activating protein	RANBP1		1	8	8	8	5	7	6	7	6	6	6	7	6	7	8	7	5	7	6	7	6	6	6	7	6	7	8	7	5	7	6	7	6	6	6	7	6	7	8	7	58.2	58.2
P43490	P43490	9	9	9	Nicotinamide phosphoribosyltransferase	NAMPT		1	9	9	9	8	8	7	8	7	7	9	8	8	7	8	6	8	8	7	8	7	7	9	8	8	7	8	6	8	8	7	8	7	7	9	8	8	7	8	6	2021-01-30	2021-01-30
P43686	P43686	17	17	17	26S protease regulatory subunit 6B	PSMC4		1	17	17	17	16	17	12	16	15	17	15	13	16	15	17	14	16	17	12	16	15	17	15	13	16	15	17	14	16	17	12	16	15	17	15	13	16	15	17	14	55	55
P45877	P45877	1	1	1	Peptidyl-prolyl cis-trans isomerase C	PPIC		1	1	1	1	0	1	0	1	0	1	1	1	1	1	1	1	0	1	0	1	0	1	1	1	1	1	1	1	0	1	0	1	0	1	1	1	1	1	1	1	2021-07-04	2021-07-04
P45880	P45880	12	12	12	Voltage-dependent anion-selective channel protein 2	VDAC2		1	12	12	12	10	11	10	12	10	10	11	11	11	11	12	11	10	11	10	12	10	10	11	11	11	11	12	11	10	11	10	12	10	10	11	11	11	11	12	11	48.6	48.6
P45954	P45954	2	2	2	Short/branched chain specific acyl-CoA dehydrogenase, mitochondrial	ACADSB		1	2	2	2	1	1	2	2	1	1	1	1	0	2	1	1	1	1	2	2	1	1	1	1	0	2	1	1	1	1	2	2	1	1	1	1	0	2	1	1	2021-01-08	2021-01-08
P45973	P45973	4	4	4	Chromobox protein homolog 5	CBX5		1	4	4	4	3	4	3	3	4	3	3	4	3	4	2	4	3	4	3	3	4	3	3	4	3	4	2	4	3	4	3	3	4	3	3	4	3	4	2	4	2021-01-24	2021-01-24
P45974	P45974	10	10	10	Ubiquitin carboxyl-terminal hydrolase 5	USP5		1	10	10	10	3	5	5	7	3	4	5	5	5	8	7	4	3	5	5	7	3	4	5	5	5	8	7	4	3	5	5	7	3	4	5	5	5	8	7	4	2021-09-12	2021-09-12
P46013	P46013	5	5	5	Antigen KI-67	MKI67		1	5	5	5	2	1	4	2	2	1	2	1	3	3	3	4	2	1	4	2	2	1	2	1	3	3	3	4	2	1	4	2	2	1	2	1	3	3	3	4	2021-05-02	2021-05-02
P46060	P46060	12	12	12	Ran GTPase-activating protein 1	RANGAP1		1	12	12	12	8	9	11	10	9	10	7	9	9	11	9	9	8	9	11	10	9	10	7	9	9	11	9	9	8	9	11	10	9	10	7	9	9	11	9	9	2021-04-28	2021-04-28
P46087	P46087	3	3	3	Probable 28S rRNA (cytosine(4447)-C(5))-methyltransferase	NOP2		1	3	3	3	3	3	3	3	3	3	1	1	2	3	2	3	3	3	3	3	3	3	1	1	2	3	2	3	3	3	3	3	3	3	1	1	2	3	2	3	2021-05-05	2021-05-05
P46109	P46109	3	3	3	Crk-like protein	CRKL		1	3	3	3	3	3	1	2	3	2	2	2	1	2	3	2	3	3	1	2	3	2	2	2	1	2	3	2	3	3	1	2	3	2	2	2	1	2	3	2	2021-06-06	2021-06-06
P46379	P46379	2	2	2	Large proline-rich protein BAG6	BAG6		1	2	2	2	2	2	2	2	2	2	2	2	1	2	2	2	2	2	2	2	2	2	2	2	1	2	2	2	2	2	2	2	2	2	2	2	1	2	2	2	2021-07-02	2021-07-02
P46439	P46439	4	3	1	Glutathione S-transferase Mu 5	GSTM5		1	4	3	1	2	3	1	4	3	3	2	2	2	3	4	2	1	3	1	3	2	2	1	2	2	3	3	2	0	1	1	1	1	0	0	1	1	1	1	0	2021-03-19	2021-01-15
P46459	P46459	28	28	28	Vesicle-fusing ATPase	NSF		1	28	28	28	23	23	24	26	25	24	21	26	26	25	26	25	23	23	24	26	25	24	21	26	26	25	26	25	23	23	24	26	25	24	21	26	26	25	26	25	46.6	46.6
P46736	P46736	1	1	1	Lys-63-specific deubiquitinase BRCC36	BRCC3		1	1	1	1	1	1	1	1	1	1	1	1	1	1	1	1	1	1	1	1	1	1	1	1	1	1	1	1	1	1	1	1	1	1	1	1	1	1	1	1	2021-07-04	2021-07-04
P46776	P46776	6	6	6	60S ribosomal protein L27a	RPL27A		1	6	6	6	6	6	5	6	6	5	6	6	6	6	6	6	6	6	5	6	6	5	6	6	6	6	6	6	6	6	5	6	6	5	6	6	6	6	6	6	33.1	33.1
P46777	P46777	16	16	16	60S ribosomal protein L5	RPL5		1	16	16	16	14	16	13	14	15	16	14	15	16	14	16	14	14	16	13	14	15	16	14	15	16	14	16	14	14	16	13	14	15	16	14	15	16	14	16	14	46.5	46.5
P46778	P46778	7	7	7	60S ribosomal protein L21	RPL21		1	7	7	7	7	6	7	6	7	7	7	6	7	7	6	7	7	6	7	6	7	7	7	6	7	7	6	7	7	6	7	6	7	7	7	6	7	7	6	7	30	30
P46779	P46779	10	10	10	60S ribosomal protein L28	RPL28		1	10	10	10	9	10	8	8	9	9	9	8	9	8	10	9	9	10	8	8	9	9	9	8	9	8	10	9	9	10	8	8	9	9	9	8	9	8	10	9	46.7	46.7
P46781	P46781	14	14	14	40S ribosomal protein S9	RPS9		1	14	14	14	12	14	12	12	11	10	11	12	10	11	14	11	12	14	12	12	11	10	11	12	10	11	14	11	12	14	12	12	11	10	11	12	10	11	14	11	51.5	51.5
P46782	P46782	15	15	15	40S ribosomal protein S5;40S ribosomal protein S5, N-terminally processed	RPS5		1	15	15	15	15	13	10	14	13	14	13	13	13	12	13	11	15	13	10	14	13	14	13	13	13	12	13	11	15	13	10	14	13	14	13	13	13	12	13	11	54.9	54.9
P46783;Q9NQ39	P46783	10;4	10;4	10;4	40S ribosomal protein S10	RPS10		2	10	10	10	9	9	9	9	9	10	10	10	9	8	9	8	9	9	9	9	9	10	10	10	9	8	9	8	9	9	9	9	9	10	10	10	9	8	9	8	52.7	52.7
P46926;Q8TDQ7	P46926	6;1	6;1	6;1	Glucosamine-6-phosphate isomerase 1	GNPDA1		2	6	6	6	4	4	3	4	6	5	4	5	5	5	4	3	4	4	3	4	6	5	4	5	5	5	4	3	4	4	3	4	6	5	4	5	5	5	4	3	32.5	32.5
P46939	P46939	10	10	10	Utrophin	UTRN		1	10	10	10	4	5	7	5	5	7	1	3	7	8	6	6	4	5	7	5	5	7	1	3	7	8	6	6	4	5	7	5	5	7	1	3	7	8	6	6	2021-05-04	2021-05-04
P46940	P46940	53	53	52	Ras GTPase-activating-like protein IQGAP1	IQGAP1		1	53	53	52	42	48	43	50	45	46	41	48	47	45	49	44	42	48	43	50	45	46	41	48	47	45	49	44	41	47	42	49	44	45	40	47	46	44	48	43	37.8	37.8
P46977	P46977	6	6	6	Dolichyl-diphosphooligosaccharide--protein glycosyltransferase subunit STT3A	STT3A		1	6	6	6	5	5	4	6	6	6	5	6	5	6	6	6	5	5	4	6	6	6	5	6	5	6	6	6	5	5	4	6	6	6	5	6	5	6	6	6	2021-08-09	2021-08-09
P47712	P47712	3	3	3	Cytosolic phospholipase A2;Phospholipase A2;Lysophospholipase	PLA2G4A		1	3	3	3	1	2	0	3	2	2	2	2	0	2	2	2	1	2	0	3	2	2	2	2	0	2	2	2	1	2	0	3	2	2	2	2	0	2	2	2	2021-08-06	2021-08-06
P47755	P47755	7	6	6	F-actin-capping protein subunit alpha-2	CAPZA2		1	7	6	6	6	7	5	5	6	7	6	6	6	5	5	5	5	6	4	4	5	6	5	5	5	4	4	4	5	6	4	4	5	6	5	5	5	4	4	4	2021-08-30	2021-03-27
P47756	P47756	18	18	18	F-actin-capping protein subunit beta	CAPZB		1	18	18	18	17	17	17	15	17	18	18	18	16	17	17	16	17	17	17	15	17	18	18	18	16	17	17	16	17	17	17	15	17	18	18	18	16	17	17	16	57.8	57.8
P47897	P47897	19	19	19	Glutamine--tRNA ligase	QARS		1	19	19	19	15	17	13	17	19	17	15	17	17	19	16	16	15	17	13	17	19	17	15	17	17	19	16	16	15	17	13	17	19	17	15	17	17	19	16	16	31.4	31.4
P47914	P47914	4	4	4	60S ribosomal protein L29	RPL29		1	4	4	4	4	4	4	4	3	4	4	4	3	3	4	4	4	4	4	4	3	4	4	4	3	3	4	4	4	4	4	4	3	4	4	4	3	3	4	4	2021-03-23	2021-03-23
P47985;P0C7P4	P47985;P0C7P4	8;6	8;6	8;6	Cytochrome b-c1 complex subunit Rieske, mitochondrial;Cytochrome b-c1 complex subunit 11;Putative cytochrome b-c1 complex subunit Rieske-like protein 1	UQCRFS1;UQCRFS1P1	;	2	8	8	8	8	6	5	8	7	5	6	6	5	6	7	8	8	6	5	8	7	5	6	6	5	6	7	8	8	6	5	8	7	5	6	6	5	6	7	8	31	31
P48047	P48047	16	16	16	ATP synthase subunit O, mitochondrial	ATP5O		1	16	16	16	11	15	14	15	14	14	13	14	12	14	15	14	11	15	14	15	14	14	13	14	12	14	15	14	11	15	14	15	14	14	13	14	12	14	15	14	77.9	77.9
P48059	P48059	1	1	1	LIM and senescent cell antigen-like-containing domain protein 1	LIMS1		1	1	1	1	1	1	1	1	1	1	1	1	1	1	1	1	1	1	1	1	1	1	1	1	1	1	1	1	1	1	1	1	1	1	1	1	1	1	1	1	2021-07-03	2021-07-03
P48147	P48147	12	12	12	Prolyl endopeptidase	PREP		1	12	12	12	9	9	7	11	11	11	9	11	11	12	10	11	9	9	7	11	11	11	9	11	11	12	10	11	9	9	7	11	11	11	9	11	11	12	10	11	2021-01-23	2021-01-23
P48163	P48163	4	4	4	NADP-dependent malic enzyme	ME1		1	4	4	4	2	2	2	3	4	3	3	4	4	2	2	2	2	2	2	3	4	3	3	4	4	2	2	2	2	2	2	3	4	3	3	4	4	2	2	2	8	8
P48426	P48426	3	3	3	Phosphatidylinositol 5-phosphate 4-kinase type-2 alpha	PIP4K2A		1	3	3	3	2	3	3	3	2	2	1	3	3	3	3	3	2	3	3	3	2	2	1	3	3	3	3	3	2	3	3	3	2	2	1	3	3	3	3	3	2021-06-08	2021-06-08
P48444	P48444	16	16	16	Coatomer subunit delta	ARCN1		1	16	16	16	15	16	15	12	15	16	16	15	15	15	15	16	15	16	15	12	15	16	16	15	15	15	15	16	15	16	15	12	15	16	16	15	15	15	15	16	38	38
P48449	P48449	2	2	2	Lanosterol synthase	LSS		1	2	2	2	1	1	1	1	2	2	1	2	2	1	1	1	1	1	1	1	2	2	1	2	2	1	1	1	1	1	1	1	2	2	1	2	2	1	1	1	2021-08-03	2021-08-03
P48506	P48506	3	3	3	Glutamate--cysteine ligase catalytic subunit	GCLC		1	3	3	3	1	1	0	2	1	2	1	2	2	1	2	0	1	1	0	2	1	2	1	2	2	1	2	0	1	1	0	2	1	2	1	2	2	1	2	0	2021-01-07	2021-01-07
P48556	P48556	4	4	4	26S proteasome non-ATPase regulatory subunit 8	PSMD8		1	4	4	4	2	3	3	2	4	4	2	1	3	3	4	3	2	3	3	2	4	4	2	1	3	3	4	3	2	3	3	2	4	4	2	1	3	3	4	3	2021-04-09	2021-04-09
P48637	P48637	10	10	10	Glutathione synthetase	GSS		1	10	10	10	7	7	7	8	9	6	6	9	9	7	8	9	7	7	7	8	9	6	6	9	9	7	8	9	7	7	7	8	9	6	6	9	9	7	8	9	31.2	31.2
P48643	P48643	35	35	35	T-complex protein 1 subunit epsilon	CCT5		1	35	35	35	32	32	32	31	32	33	31	33	31	32	34	32	32	32	32	31	32	33	31	33	31	32	34	32	32	32	32	31	32	33	31	33	31	32	34	32	73	73
P48651	P48651	1	1	1	Phosphatidylserine synthase 1	PTDSS1		1	1	1	1	1	1	1	1	1	1	1	1	1	1	1	1	1	1	1	1	1	1	1	1	1	1	1	1	1	1	1	1	1	1	1	1	1	1	1	1	3	3
P48729	P48729	3	3	3	Casein kinase I isoform alpha	CSNK1A1		1	3	3	3	1	0	2	2	1	1	1	1	1	1	2	0	1	0	2	2	1	1	1	1	1	1	2	0	1	0	2	2	1	1	1	1	1	1	2	0	2021-08-09	2021-08-09
P48735	P48735	25	25	24	Isocitrate dehydrogenase [NADP], mitochondrial	IDH2		1	25	25	24	20	22	21	22	23	23	21	23	23	22	25	21	20	22	21	22	23	23	21	23	23	22	25	21	20	22	20	21	22	22	20	22	22	21	24	21	59.5	59.5
P48739	P48739	3	3	3	Phosphatidylinositol transfer protein beta isoform	PITPNB		1	3	3	3	3	3	3	2	3	3	2	2	3	3	2	2	3	3	3	2	3	3	2	2	3	3	2	2	3	3	3	2	3	3	2	2	3	3	2	2	17	17
P48775	P48775	2	2	2	Tryptophan 2,3-dioxygenase	TDO2		1	2	2	2	1	1	1	1	2	2	2	2	2	1	1	1	1	1	1	1	2	2	2	2	2	1	1	1	1	1	1	1	2	2	2	2	2	1	1	1	2021-04-07	2021-04-07
P48960;Q9UHX3	P48960	4;1	4;1	4;1	CD97 antigen;CD97 antigen subunit alpha;CD97 antigen subunit beta	CD97		2	4	4	4	3	4	2	4	3	2	3	4	4	4	4	4	3	4	2	4	3	2	3	4	4	4	4	4	3	4	2	4	3	2	3	4	4	4	4	4	2021-03-06	2021-03-06
P49005	P49005	1	1	1	DNA polymerase delta subunit 2	POLD2		1	1	1	1	1	1	1	1	1	1	1	1	1	1	1	1	1	1	1	1	1	1	1	1	1	1	1	1	1	1	1	1	1	1	1	1	1	1	1	1	2021-02-03	2021-02-03
P49006	P49006	2	2	2	MARCKS-related protein	MARCKSL1		1	2	2	2	2	2	2	2	2	2	2	2	2	2	2	2	2	2	2	2	2	2	2	2	2	2	2	2	2	2	2	2	2	2	2	2	2	2	2	2	2021-04-14	2021-04-14
P49023	P49023	3	3	3	Paxillin	PXN		1	3	3	3	2	3	3	3	3	2	2	3	3	3	3	3	2	3	3	3	3	2	2	3	3	3	3	3	2	3	3	3	3	2	2	3	3	3	3	3	11	11
P49189	P49189	19	19	19	4-trimethylaminobutyraldehyde dehydrogenase	ALDH9A1		1	19	19	19	16	16	13	16	15	17	12	15	17	14	16	16	16	16	13	16	15	17	12	15	17	14	16	16	16	16	13	16	15	17	12	15	17	14	16	16	39.5	39.5
P49207	P49207	7	7	7	60S ribosomal protein L34	RPL34		1	7	7	7	7	7	7	7	7	7	7	7	7	7	7	7	7	7	7	7	7	7	7	7	7	7	7	7	7	7	7	7	7	7	7	7	7	7	7	7	40.2	40.2
P49257	P49257	7	7	7	Protein ERGIC-53	LMAN1		1	7	7	7	7	6	6	7	5	6	5	6	6	6	7	7	7	6	6	7	5	6	5	6	6	6	7	7	7	6	6	7	5	6	5	6	6	6	7	7	2021-06-18	2021-06-18
P49321	P49321	11	11	11	Nuclear autoantigenic sperm protein	NASP		1	11	11	11	9	10	8	10	10	10	10	10	10	10	11	9	9	10	8	10	10	10	10	10	10	10	11	9	9	10	8	10	10	10	10	10	10	10	11	9	2021-04-16	2021-04-16
P49327	P49327	64	64	64	Fatty acid synthase;[Acyl-carrier-protein] S-acetyltransferase;[Acyl-carrier-protein] S-malonyltransferase;3-oxoacyl-[acyl-carrier-protein] synthase;3-oxoacyl-[acyl-carrier-protein] reductase;3-hydroxyacyl-[acyl-carrier-protein] dehydratase;Enoyl-[acyl-carrier-protein] reductase;Oleoyl-[acyl-carrier-protein] hydrolase	FASN		1	64	64	64	50	49	47	47	55	53	46	58	53	56	55	55	50	49	47	47	55	53	46	58	53	56	55	55	50	49	47	47	55	53	46	58	53	56	55	55	38.3	38.3
P49354	P49354	2	2	2	Protein farnesyltransferase/geranylgeranyltransferase type-1 subunit alpha	FNTA		1	2	2	2	0	1	1	2	2	1	0	1	2	2	2	1	0	1	1	2	2	1	0	1	2	2	2	1	0	1	1	2	2	1	0	1	2	2	2	1	2021-02-08	2021-02-08
P49368	P49368	32	32	32	T-complex protein 1 subunit gamma	CCT3		1	32	32	32	24	28	23	27	27	28	26	27	26	28	29	29	24	28	23	27	27	28	26	27	26	28	29	29	24	28	23	27	27	28	26	27	26	28	29	29	64.4	64.4
P49406	P49406	3	3	3	39S ribosomal protein L19, mitochondrial	MRPL19		1	3	3	3	1	1	2	1	1	3	2	3	2	2	2	1	1	1	2	1	1	3	2	3	2	2	2	1	1	1	2	1	1	3	2	3	2	2	2	1	2021-02-08	2021-02-08
P49407	P49407	4	4	4	Beta-arrestin-1	ARRB1		1	4	4	4	2	4	3	3	4	2	2	4	4	3	4	3	2	4	3	3	4	2	2	4	4	3	4	3	2	4	3	3	4	2	2	4	4	3	4	3	2021-06-14	2021-06-14
P49411	P49411	28	28	28	Elongation factor Tu, mitochondrial	TUFM		1	28	28	28	27	26	22	28	26	25	24	28	24	25	27	26	27	26	22	28	26	25	24	28	24	25	27	26	27	26	22	28	26	25	24	28	24	25	27	26	73.5	73.5
P49458	P49458	7	7	7	Signal recognition particle 9 kDa protein	SRP9		1	7	7	7	5	4	6	6	6	7	4	5	5	5	5	5	5	4	6	6	6	7	4	5	5	5	5	5	5	4	6	6	6	7	4	5	5	5	5	5	64	64
P49585;Q9Y5K3	P49585;Q9Y5K3	6;3	6;3	6;3	Choline-phosphate cytidylyltransferase A;Choline-phosphate cytidylyltransferase B	PCYT1A;PCYT1B	;	2	6	6	6	5	5	4	5	5	5	4	6	4	6	5	5	5	5	4	5	5	5	4	6	4	6	5	5	5	5	4	5	5	5	4	6	4	6	5	5	2021-02-26	2021-02-26
P49588	P49588	22	22	22	Alanine--tRNA ligase, cytoplasmic	AARS		1	22	22	22	15	15	15	19	18	20	16	19	19	18	21	18	15	15	15	19	18	20	16	19	19	18	21	18	15	15	15	19	18	20	16	19	19	18	21	18	34.7	34.7
P49589	P49589	2	2	2	Cysteine--tRNA ligase, cytoplasmic	CARS		1	2	2	2	2	2	2	2	2	2	2	2	2	2	2	2	2	2	2	2	2	2	2	2	2	2	2	2	2	2	2	2	2	2	2	2	2	2	2	2	2021-02-03	2021-02-03
P49590	P49590	5	2	2	Probable histidine--tRNA ligase, mitochondrial	HARS2		1	5	2	2	3	3	5	4	3	5	4	3	5	4	5	4	2	2	2	2	0	2	1	1	2	2	2	2	2	2	2	2	0	2	1	1	2	2	2	2	2021-03-10	2021-03-04
P49591	P49591	12	12	12	Serine--tRNA ligase, cytoplasmic	SARS		1	12	12	12	9	11	10	11	10	10	10	10	11	11	10	12	9	11	10	11	10	10	10	10	11	11	10	12	9	11	10	11	10	10	10	10	11	11	10	12	2021-05-26	2021-05-26
P49593	P49593	7	7	7	Protein phosphatase 1F	PPM1F		1	7	7	7	7	7	5	5	5	4	6	6	7	6	7	6	7	7	5	5	5	4	6	6	7	6	7	6	7	7	5	5	5	4	6	6	7	6	7	6	30.2	30.2
P49643	P49643	1	1	1	DNA primase large subunit	PRIM2		1	1	1	1	1	1	1	1	1	0	0	1	0	1	1	1	1	1	1	1	1	0	0	1	0	1	1	1	1	1	1	1	1	0	0	1	0	1	1	1	2021-08-02	2021-08-02
P49720	P49720	3	3	3	Proteasome subunit beta type-3	PSMB3		1	3	3	3	3	3	3	2	3	3	3	3	3	2	3	3	3	3	3	2	3	3	3	3	3	2	3	3	3	3	3	2	3	3	3	3	3	2	3	3	2021-09-25	2021-09-25
P49721	P49721	4	4	4	Proteasome subunit beta type-2	PSMB2		1	4	4	4	2	4	4	4	3	3	4	4	4	4	4	4	2	4	4	4	3	3	4	4	4	4	4	4	2	4	4	4	3	3	4	4	4	4	4	4	2021-04-25	2021-04-25
P49736	P49736	6	6	6	DNA replication licensing factor MCM2	MCM2		1	6	6	6	2	5	6	6	3	4	2	3	3	6	6	3	2	5	6	6	3	4	2	3	3	6	6	3	2	5	6	6	3	4	2	3	3	6	6	3	2021-06-09	2021-06-09
P49748	P49748	21	21	21	Very long-chain specific acyl-CoA dehydrogenase, mitochondrial	ACADVL		1	21	21	21	17	17	16	16	17	16	14	17	14	21	17	17	17	17	16	16	17	16	14	17	14	21	17	17	17	17	16	16	17	16	14	17	14	21	17	17	45.6	45.6
P49750	P49750	3	3	3	YLP motif-containing protein 1	YLPM1		1	3	3	3	2	2	2	3	3	3	3	3	3	3	3	3	2	2	2	3	3	3	3	3	3	3	3	3	2	2	2	3	3	3	3	3	3	3	3	3	2	2
P49754	P49754	1	1	1	Vacuolar protein sorting-associated protein 41 homolog	VPS41		1	1	1	1	1	1	1	1	0	1	0	0	1	1	1	1	1	1	1	1	0	1	0	0	1	1	1	1	1	1	1	1	0	1	0	0	1	1	1	1	2021-08-01	2021-08-01
P49755	P49755	7	7	7	Transmembrane emp24 domain-containing protein 10	TMED10		1	7	7	7	6	6	7	7	7	7	6	7	6	6	7	7	6	6	7	7	7	7	6	7	6	6	7	7	6	6	7	7	7	7	6	7	6	6	7	7	2021-01-31	2021-01-31
P49756	P49756	5	5	5	RNA-binding protein 25	RBM25		1	5	5	5	4	4	3	4	4	5	3	4	5	3	4	3	4	4	3	4	4	5	3	4	5	3	4	3	4	4	3	4	4	5	3	4	5	3	4	3	2021-04-09	2021-04-09
P49757	P49757	4	4	4	Protein numb homolog	NUMB		1	4	4	4	4	3	1	1	3	3	2	1	1	1	2	4	4	3	1	1	3	3	2	1	1	1	2	4	4	3	1	1	3	3	2	1	1	1	2	4	2021-04-08	2021-04-08
P49761	P49761	1	1	1	Dual specificity protein kinase CLK3	CLK3		1	1	1	1	1	1	0	1	1	1	0	1	1	0	1	1	1	1	0	1	1	1	0	1	1	0	1	1	1	1	0	1	1	1	0	1	1	0	1	1	2021-01-03	2021-01-03
P49770	P49770	3	3	3	Translation initiation factor eIF-2B subunit beta	EIF2B2		1	3	3	3	2	0	3	1	2	1	2	0	1	1	0	2	2	0	3	1	2	1	2	0	1	1	0	2	2	0	3	1	2	1	2	0	1	1	0	2	10	10
P49773	P49773	10	10	10	Histidine triad nucleotide-binding protein 1	HINT1		1	10	10	10	9	9	9	9	8	9	9	9	9	9	8	9	9	9	9	9	8	9	9	9	9	9	8	9	9	9	9	9	8	9	9	9	9	9	8	9	83.3	83.3
P49792;P0DJD0;P0DJD1;Q99666;O14715	P49792	10;3;3;2;2	10;3;3;2;2	6;0;0;0;0	E3 SUMO-protein ligase RanBP2	RANBP2		5	10	10	6	5	6	5	9	7	8	5	6	6	7	8	7	5	6	5	9	7	8	5	6	6	7	8	7	2	2	2	5	3	4	2	2	3	4	4	3	2021-04-04	2021-04-04
P49821	P49821	9	9	9	NADH dehydrogenase [ubiquinone] flavoprotein 1, mitochondrial	NDUFV1		1	9	9	9	6	7	7	8	5	5	6	7	5	7	6	3	6	7	7	8	5	5	6	7	5	7	6	3	6	7	7	8	5	5	6	7	5	7	6	3	36.6	36.6
P49841	P49841	2	2	2	Glycogen synthase kinase-3 beta	GSK3B		1	2	2	2	1	1	1	1	1	1	1	2	2	2	1	1	1	1	1	1	1	1	1	2	2	2	1	1	1	1	1	1	1	1	1	2	2	2	1	1	2021-06-12	2021-06-12
P49902	P49902	4	4	4	Cytosolic purine 5-nucleotidase	NT5C2		1	4	4	4	3	3	2	3	4	3	3	3	0	4	3	1	3	3	2	3	4	3	3	3	0	4	3	1	3	3	2	3	4	3	3	3	0	4	3	1	2021-05-10	2021-05-10
P49903	P49903	2	2	2	Selenide, water dikinase 1	SEPHS1		1	2	2	2	2	2	1	2	2	2	1	2	2	2	2	2	2	2	1	2	2	2	1	2	2	2	2	2	2	2	1	2	2	2	1	2	2	2	2	2	2021-07-09	2021-07-09
P49915	P49915	17	17	17	GMP synthase [glutamine-hydrolyzing]	GMPS		1	17	17	17	14	14	13	13	11	13	13	12	13	16	17	12	14	14	13	13	11	13	13	12	13	16	17	12	14	14	13	13	11	13	13	12	13	16	17	12	33.3	33.3
P49959	P49959	6	6	6	Double-strand break repair protein MRE11A	MRE11A		1	6	6	6	5	6	5	4	6	5	4	4	5	6	5	5	5	6	5	4	6	5	4	4	5	6	5	5	5	6	5	4	6	5	4	4	5	6	5	5	2021-07-09	2021-07-09
P50135	P50135	3	3	3	Histamine N-methyltransferase	HNMT		1	3	3	3	2	3	2	3	3	3	3	3	3	3	3	3	2	3	2	3	3	3	3	3	3	3	3	3	2	3	2	3	3	3	3	3	3	3	3	3	2021-05-19	2021-05-19
P50148;O95837;P29992	P50148	4;1;1	4;1;1	4;1;1	Guanine nucleotide-binding protein G(q) subunit alpha	GNAQ		3	4	4	4	3	4	4	4	4	3	2	3	4	3	4	3	3	4	4	4	4	3	2	3	4	3	4	3	3	4	4	4	4	3	2	3	4	3	4	3	2021-01-11	2021-01-11
P50151	P50151	3	3	3	Guanine nucleotide-binding protein G(I)/G(S)/G(O) subunit gamma-10	GNG10		1	3	3	3	2	2	2	2	2	2	1	2	3	0	2	0	2	2	2	2	2	2	1	2	3	0	2	0	2	2	2	2	2	2	1	2	3	0	2	0	75	75
P50213	P50213	9	9	9	Isocitrate dehydrogenase [NAD] subunit alpha, mitochondrial	IDH3A		1	9	9	9	5	5	8	8	6	8	5	7	8	9	8	7	5	5	8	8	6	8	5	7	8	9	8	7	5	5	8	8	6	8	5	7	8	9	8	7	2021-06-27	2021-06-27
P50225;P50226;P0DMN0;P0DMM9	P50225;P50226	6;4;2;2	6;4;2;2	6;4;2;2	Sulfotransferase 1A1;Sulfotransferase 1A2	SULT1A1;SULT1A2	;	4	6	6	6	4	4	6	6	6	6	2	6	5	4	6	5	4	4	6	6	6	6	2	6	5	4	6	5	4	4	6	6	6	6	2	6	5	4	6	5	2021-05-31	2021-05-31
P50281	P50281	5	5	5	Matrix metalloproteinase-14	MMP14		1	5	5	5	3	4	3	3	3	4	3	3	4	4	4	4	3	4	3	3	3	4	3	3	4	4	4	4	3	4	3	3	3	4	3	3	4	4	4	4	2021-01-08	2021-01-08
P50395	P50395	31	31	25	Rab GDP dissociation inhibitor beta	GDI2		1	31	31	25	26	24	20	26	25	25	23	28	25	25	28	22	26	24	20	26	25	25	23	28	25	25	28	22	21	20	17	20	20	20	17	23	19	20	22	18	78.2	78.2
P50416	P50416	6	6	6	Carnitine O-palmitoyltransferase 1, liver isoform	CPT1A		1	6	6	6	4	6	5	6	4	4	4	5	4	5	4	5	4	6	5	6	4	4	4	5	4	5	4	5	4	6	5	6	4	4	4	5	4	5	4	5	2021-05-10	2021-05-10
P50440	P50440	1	1	1	Glycine amidinotransferase, mitochondrial	GATM		1	1	1	1	1	1	0	1	0	1	0	0	0	0	1	0	1	1	0	1	0	1	0	0	0	0	1	0	1	1	0	1	0	1	0	0	0	0	1	0	4	4
P50452;P50453	P50452;P50453	3;2	2;1	2;1	Serpin B8;Serpin B9	SERPINB8;SERPINB9	;	2	3	2	2	1	2	3	2	2	2	0	1	2	2	3	3	1	1	2	1	1	1	0	0	1	1	2	2	1	1	2	1	1	1	0	0	1	1	2	2	2021-09-09	2021-02-07
P50454	P50454	14	14	14	Serpin H1	SERPINH1		1	14	14	14	12	13	13	12	12	12	12	13	13	13	13	14	12	13	13	12	12	12	12	13	13	13	13	14	12	13	13	12	12	12	12	13	13	13	13	14	54.5	54.5
P50502;Q8IZP2;Q8NFI4	P50502;Q8IZP2;Q8NFI4	9;7;5	9;7;5	9;7;5	Hsc70-interacting protein;Putative protein FAM10A4;Putative protein FAM10A5	ST13;ST13P4;ST13P5	;;	3	9	9	9	7	7	7	9	9	8	8	8	9	8	7	7	7	7	7	9	9	8	8	8	9	8	7	7	7	7	7	9	9	8	8	8	9	8	7	7	23	23
P50552	P50552	18	18	18	Vasodilator-stimulated phosphoprotein	VASP		1	18	18	18	17	17	18	17	18	17	16	17	17	18	17	18	17	17	18	17	18	17	16	17	17	18	17	18	17	17	18	17	18	17	16	17	17	18	17	18	51.3	51.3
P50570	P50570	18	18	10	Dynamin-2	DNM2		1	18	18	10	12	15	13	14	16	15	14	14	14	16	16	13	12	15	13	14	16	15	14	14	14	16	16	13	8	8	6	8	9	8	8	8	8	9	9	8	2021-05-28	2021-05-28
P50583	P50583	2	2	2	Bis(5-nucleosyl)-tetraphosphatase [asymmetrical]	NUDT2		1	2	2	2	2	2	1	2	2	1	2	2	2	2	2	1	2	2	1	2	2	1	2	2	2	2	2	1	2	2	1	2	2	1	2	2	2	2	2	1	2021-05-26	2021-05-26
P50897	P50897	15	15	15	Palmitoyl-protein thioesterase 1	PPT1		1	15	15	15	14	14	15	14	14	14	13	14	14	14	14	14	14	14	15	14	14	14	13	14	14	14	14	14	14	14	15	14	14	14	13	14	14	14	14	14	64.1	64.1
P50914	P50914	6	6	6	60S ribosomal protein L14	RPL14		1	6	6	6	6	6	5	6	5	6	5	5	5	6	6	6	6	6	5	6	5	6	5	5	5	6	6	6	6	6	5	6	5	6	5	5	5	6	6	6	2021-01-25	2021-01-25
P50990	P50990	42	42	42	T-complex protein 1 subunit theta	CCT8		1	42	42	42	34	36	32	37	36	36	30	35	33	35	39	32	34	36	32	37	36	36	30	35	33	35	39	32	34	36	32	37	36	36	30	35	33	35	39	32	69	69
P50991	P50991	27	27	27	T-complex protein 1 subunit delta	CCT4		1	27	27	27	22	23	24	24	24	26	24	23	24	26	25	26	22	23	24	24	24	26	24	23	24	26	25	26	22	23	24	24	24	26	24	23	24	26	25	26	55.3	55.3
P50995	P50995	10	10	10	Annexin A11	ANXA11		1	10	10	10	7	9	6	9	7	7	7	9	8	8	9	7	7	9	6	9	7	7	7	9	8	8	9	7	7	9	6	9	7	7	7	9	8	8	9	7	2021-04-24	2021-04-24
P51003	P51003	1	1	1	Poly(A) polymerase alpha	PAPOLA		1	1	1	1	0	1	1	1	1	1	0	0	1	0	0	1	0	1	1	1	1	1	0	0	1	0	0	1	0	1	1	1	1	1	0	0	1	0	0	1	2021-08-02	2021-08-02
P51148	P51148	10	10	8	Ras-related protein Rab-5C	RAB5C		1	10	10	8	9	9	9	10	10	9	9	9	10	10	10	10	9	9	9	10	10	9	9	9	10	10	10	10	8	7	8	8	8	7	8	8	8	8	8	8	47.7	47.7
P51149	P51149	19	19	19	Ras-related protein Rab-7a	RAB7A		1	19	19	19	18	15	16	17	19	19	18	18	17	17	18	17	18	15	16	17	19	19	18	18	17	17	18	17	18	15	16	17	19	19	18	18	17	17	18	17	83.6	83.6
P51151	P51151	2	2	2	Ras-related protein Rab-9A	RAB9A		1	2	2	2	1	2	1	1	0	1	1	2	2	2	1	1	1	2	1	1	0	1	1	2	2	2	1	1	1	2	1	1	0	1	1	2	2	2	1	1	2021-04-18	2021-04-18
P51153	P51153	6	4	4	Ras-related protein Rab-13	RAB13		1	6	4	4	4	5	6	6	5	5	6	6	5	6	6	6	2	3	4	4	3	3	4	4	3	4	4	4	2	3	4	4	3	3	4	4	3	4	4	4	33	2021-01-24
P51159;O00194	P51159	5;1	5;1	5;1	Ras-related protein Rab-27A	RAB27A		2	5	5	5	4	5	3	4	3	3	3	3	2	4	5	3	4	5	3	4	3	3	3	3	2	4	5	3	4	5	3	4	3	3	3	3	2	4	5	3	2021-02-26	2021-02-26
P51397	P51397	1	1	1	Death-associated protein 1	DAP		1	1	1	1	0	1	1	1	1	1	0	1	1	1	1	1	0	1	1	1	1	1	0	1	1	1	1	1	0	1	1	1	1	1	0	1	1	1	1	1	2021-08-10	2021-08-10
P51398	P51398	2	2	2	28S ribosomal protein S29, mitochondrial	DAP3		1	2	2	2	0	1	1	1	2	1	0	2	1	2	2	2	0	1	1	1	2	1	0	2	1	2	2	2	0	1	1	1	2	1	0	2	1	2	2	2	2021-03-10	2021-03-10
P51452	P51452	7	7	7	Dual specificity protein phosphatase 3	DUSP3		1	7	7	7	5	6	6	6	5	6	5	7	6	6	7	6	5	6	6	6	5	6	5	7	6	6	7	6	5	6	6	6	5	6	5	7	6	6	7	6	45.9	45.9
P51531;P51532	P51531;P51532	4;2	4;2	4;2	Probable global transcription activator SNF2L2;Transcription activator BRG1	SMARCA2;SMARCA4	;	2	4	4	4	3	3	4	4	3	3	2	4	3	3	3	3	3	3	4	4	3	3	2	4	3	3	3	3	3	3	4	4	3	3	2	4	3	3	3	3	2021-06-03	2021-06-03
P51553	P51553	6	6	6	Isocitrate dehydrogenase [NAD] subunit gamma, mitochondrial	IDH3G		1	6	6	6	5	6	5	6	6	5	4	6	6	6	6	6	5	6	5	6	6	5	4	6	6	6	6	6	5	6	5	6	6	5	4	6	6	6	6	6	30	30
P51570	P51570	14	14	14	Galactokinase	GALK1		1	14	14	14	8	9	8	10	10	11	8	9	10	11	12	12	8	9	8	10	10	11	8	9	10	11	12	12	8	9	8	10	10	11	8	9	10	11	12	12	40.3	40.3
P51571	P51571	7	7	7	Translocon-associated protein subunit delta	SSR4		1	7	7	7	7	4	5	7	6	6	5	5	7	7	7	6	7	4	5	7	6	6	5	5	7	7	7	6	7	4	5	7	6	6	5	5	7	7	7	6	38.2	38.2
P51572	P51572	13	13	13	B-cell receptor-associated protein 31	BCAP31		1	13	13	13	12	13	13	13	12	12	11	11	13	12	11	12	12	13	13	13	12	12	11	11	13	12	11	12	12	13	13	13	12	12	11	11	13	12	11	12	44.3	44.3
P51606	P51606	1	1	1	N-acylglucosamine 2-epimerase	RENBP		1	1	1	1	1	1	1	1	1	1	1	1	1	1	1	1	1	1	1	1	1	1	1	1	1	1	1	1	1	1	1	1	1	1	1	1	1	1	1	1	2021-02-05	2021-02-05
P51610	P51610	11	11	11	Host cell factor 1;HCF N-terminal chain 1;HCF N-terminal chain 2;HCF N-terminal chain 3;HCF N-terminal chain 4;HCF N-terminal chain 5;HCF N-terminal chain 6;HCF C-terminal chain 1;HCF C-terminal chain 2;HCF C-terminal chain 3;HCF C-terminal chain 4;HCF C-terminal chain 5;HCF C-terminal chain 6	HCFC1		1	11	11	11	8	8	8	9	8	8	6	8	9	8	9	8	8	8	8	9	8	8	6	8	9	8	9	8	8	8	8	9	8	8	6	8	9	8	9	8	2021-08-10	2021-08-10
P51659	P51659	31	31	31	Peroxisomal multifunctional enzyme type 2;(3R)-hydroxyacyl-CoA dehydrogenase;Enoyl-CoA hydratase 2	HSD17B4		1	31	31	31	30	27	28	30	27	28	30	30	28	28	29	26	30	27	28	30	27	28	30	30	28	28	29	26	30	27	28	30	27	28	30	30	28	28	29	26	54.3	54.3
P51665	P51665	5	5	5	26S proteasome non-ATPase regulatory subunit 7	PSMD7		1	5	5	5	4	5	5	5	5	5	5	5	5	5	5	5	4	5	5	5	5	5	5	5	5	5	5	5	4	5	5	5	5	5	5	5	5	5	5	5	2021-07-28	2021-07-28
P51787	P51787	1	1	1	Potassium voltage-gated channel subfamily KQT member 1	KCNQ1		1	1	1	1	1	1	1	1	1	1	0	1	1	1	1	1	1	1	1	1	1	1	0	1	1	1	1	1	1	1	1	1	1	1	0	1	1	1	1	1	2021-05-01	2021-05-01
P51809	P51809	2	2	2	Vesicle-associated membrane protein 7	VAMP7		1	2	2	2	1	1	1	0	0	0	2	0	0	0	1	0	1	1	1	0	0	0	2	0	0	0	1	0	1	1	1	0	0	0	2	0	0	0	1	0	2021-07-07	2021-07-07
P51812;Q9UK32;Q96GX5;Q6P0Q8;O15021	P51812	4;1;1;1;1	3;0;0;0;0	3;0;0;0;0	Ribosomal protein S6 kinase alpha-3	RPS6KA3		5	4	3	3	1	2	1	1	3	3	1	2	3	2	2	1	1	1	1	1	2	2	0	2	3	1	2	1	1	1	1	1	2	2	0	2	3	1	2	1	7	2021-09-05
P51858	P51858	9	9	9	Hepatoma-derived growth factor	HDGF		1	9	9	9	7	9	9	9	8	8	7	9	9	9	8	9	7	9	9	9	8	8	7	9	9	9	8	9	7	9	9	9	8	8	7	9	9	9	8	9	57.1	57.1
P51970	P51970	4	4	4	NADH dehydrogenase [ubiquinone] 1 alpha subcomplex subunit 8	NDUFA8		1	4	4	4	3	3	3	3	3	3	3	3	3	3	4	3	3	3	3	3	3	3	3	3	3	3	4	3	3	3	3	3	3	3	3	3	3	3	4	3	2021-07-22	2021-07-22
P51991	P51991	18	18	18	Heterogeneous nuclear ribonucleoprotein A3	HNRNPA3		1	18	18	18	14	18	16	18	16	17	13	18	16	18	18	17	14	18	16	18	16	17	13	18	16	18	18	17	14	18	16	18	16	17	13	18	16	18	18	17	52.6	52.6
P52209	P52209	25	25	25	6-phosphogluconate dehydrogenase, decarboxylating	PGD		1	25	25	25	20	25	19	23	21	20	20	23	21	24	24	19	20	25	19	23	21	20	20	23	21	24	24	19	20	25	19	23	21	20	20	23	21	24	24	19	65.6	65.6
P52272	P52272	32	32	32	Heterogeneous nuclear ribonucleoprotein M	HNRNPM		1	32	32	32	26	25	26	26	27	29	21	27	31	27	28	28	26	25	26	26	27	29	21	27	31	27	28	28	26	25	26	26	27	29	21	27	31	27	28	28	50.8	50.8
P52292	P52292	5	5	5	Importin subunit alpha-1	KPNA2		1	5	5	5	2	3	4	4	2	2	2	3	3	4	4	1	2	3	4	4	2	2	2	3	3	4	4	1	2	3	4	4	2	2	2	3	3	4	4	1	2021-09-15	2021-09-15
P52306	P52306	7	7	7	Rap1 GTPase-GDP dissociation stimulator 1	RAP1GDS1		1	7	7	7	5	5	3	5	6	6	6	7	6	6	7	4	5	5	3	5	6	6	6	7	6	6	7	4	5	5	3	5	6	6	6	7	6	6	7	4	2021-01-16	2021-01-16
P52565	P52565	10	10	10	Rho GDP-dissociation inhibitor 1	ARHGDIA		1	10	10	10	9	9	8	8	9	10	10	10	10	9	8	9	9	9	8	8	9	10	10	10	10	9	8	9	9	9	8	8	9	10	10	10	10	9	8	9	73	73
P52566	P52566	18	18	18	Rho GDP-dissociation inhibitor 2	ARHGDIB		1	18	18	18	13	14	13	17	15	14	11	16	12	16	17	14	13	14	13	17	15	14	11	16	12	16	17	14	13	14	13	17	15	14	11	16	12	16	17	14	84.6	84.6
P52594	P52594	1	1	1	Arf-GAP domain and FG repeat-containing protein 1	AGFG1		1	1	1	1	1	1	1	1	1	1	1	1	1	1	1	1	1	1	1	1	1	1	1	1	1	1	1	1	1	1	1	1	1	1	1	1	1	1	1	1	2021-01-04	2021-01-04
P52597	P52597	13	11	11	Heterogeneous nuclear ribonucleoprotein F;Heterogeneous nuclear ribonucleoprotein F, N-terminally processed	HNRNPF		1	13	11	11	10	13	9	11	12	12	10	12	9	13	13	11	8	11	7	9	10	10	8	10	7	11	11	9	8	11	7	9	10	10	8	10	7	11	11	9	47.2	44.8
P52630	P52630	2	2	2	Signal transducer and activator of transcription 2	STAT2		1	2	2	2	1	2	2	2	2	2	1	2	2	1	2	2	1	2	2	2	2	2	1	2	2	1	2	2	1	2	2	2	2	2	1	2	2	1	2	2	2021-03-04	2021-03-04
P52788	P52788	3	3	3	Spermine synthase	SMS		1	3	3	3	2	2	2	3	3	2	3	2	1	3	3	3	2	2	2	3	3	2	3	2	1	3	3	3	2	2	2	3	3	2	3	2	1	3	3	3	2021-08-20	2021-08-20
P52789	P52789	2	2	2	Hexokinase-2	HK2		1	2	2	2	2	0	2	1	2	2	2	2	2	2	1	1	2	0	2	1	2	2	2	2	2	2	1	1	2	0	2	1	2	2	2	2	2	2	1	1	2021-08-02	2021-08-02
P52815	P52815	4	4	4	39S ribosomal protein L12, mitochondrial	MRPL12		1	4	4	4	3	4	2	4	4	4	2	4	4	4	4	3	3	4	2	4	4	4	2	4	4	4	4	3	3	4	2	4	4	4	2	4	4	4	4	3	2021-03-30	2021-03-30
P52888	P52888	7	7	7	Thimet oligopeptidase	THOP1		1	7	7	7	3	5	4	4	7	7	2	5	4	5	4	5	3	5	4	4	7	7	2	5	4	5	4	5	3	5	4	4	7	7	2	5	4	5	4	5	2021-09-12	2021-09-12
P52895;Q04828	P52895;Q04828	2;1	1;0	1;0	Aldo-keto reductase family 1 member C2;Aldo-keto reductase family 1 member C1	AKR1C2;AKR1C1	;	2	2	1	1	2	1	2	2	2	2	2	2	2	2	2	2	1	1	1	1	1	1	1	1	1	1	1	1	1	1	1	1	1	1	1	1	1	1	1	1	2021-02-06	2021-07-03
P52907	P52907	14	14	13	F-actin-capping protein subunit alpha-1	CAPZA1		1	14	14	13	14	13	12	14	14	14	12	14	14	13	13	14	14	13	12	14	14	14	12	14	14	13	13	14	13	12	11	13	13	13	11	13	13	12	12	13	70.6	70.6
P52948	P52948	5	5	5	Nuclear pore complex protein Nup98-Nup96;Nuclear pore complex protein Nup98;Nuclear pore complex protein Nup96	NUP98		1	5	5	5	2	2	2	2	3	3	2	3	3	3	3	3	2	2	2	2	3	3	2	3	3	3	3	3	2	2	2	2	3	3	2	3	3	3	3	3	2021-04-03	2021-04-03
P53004	P53004	5	5	5	Biliverdin reductase A	BLVRA		1	5	5	5	2	2	4	4	4	3	4	4	4	2	2	3	2	2	4	4	4	3	4	4	4	2	2	3	2	2	4	4	4	3	4	4	4	2	2	3	25	25
P53007	P53007	6	6	6	Tricarboxylate transport protein, mitochondrial	SLC25A1		1	6	6	6	6	5	5	6	6	6	6	6	6	6	5	5	6	5	5	6	6	6	6	6	6	6	5	5	6	5	5	6	6	6	6	6	6	6	5	5	2021-01-25	2021-01-25
P53041	P53041	4	4	4	Serine/threonine-protein phosphatase 5	PPP5C		1	4	4	4	3	3	4	3	2	3	3	2	3	3	3	3	3	3	4	3	2	3	3	2	3	3	3	3	3	3	4	3	2	3	3	2	3	3	3	3	2021-08-10	2021-08-10
P53367	P53367	3	3	3	Arfaptin-1	ARFIP1		1	3	3	3	3	3	3	2	3	3	2	3	3	2	3	3	3	3	3	2	3	3	2	3	3	2	3	3	3	3	3	2	3	3	2	3	3	2	3	3	2021-06-16	2021-06-16
P53396	P53396	36	36	36	ATP-citrate synthase	ACLY		1	36	36	36	29	32	34	33	33	34	30	34	33	33	34	33	29	32	34	33	33	34	30	34	33	33	34	33	29	32	34	33	33	34	30	34	33	33	34	33	41.5	41.5
P53582	P53582	6	6	6	Methionine aminopeptidase 1	METAP1		1	6	6	6	2	5	5	5	4	5	1	4	4	5	3	5	2	5	5	5	4	5	1	4	4	5	3	5	2	5	5	5	4	5	1	4	4	5	3	5	2021-05-28	2021-05-28
P53597	P53597	6	6	6	Succinyl-CoA ligase [ADP/GDP-forming] subunit alpha, mitochondrial	SUCLG1		1	6	6	6	3	4	5	6	6	6	4	5	4	5	5	4	3	4	5	6	6	6	4	5	4	5	5	4	3	4	5	6	6	6	4	5	4	5	5	4	2021-07-25	2021-07-25
P53602	P53602	2	2	2	Diphosphomevalonate decarboxylase	MVD		1	2	2	2	1	1	1	2	2	2	1	2	2	2	2	2	1	1	1	2	2	2	1	2	2	2	2	2	1	1	1	2	2	2	1	2	2	2	2	2	2021-02-11	2021-02-11
P53611	P53611	2	2	2	Geranylgeranyl transferase type-2 subunit beta	RABGGTB		1	2	2	2	0	2	1	2	2	1	2	1	0	1	2	1	0	2	1	2	2	1	2	1	0	1	2	1	0	2	1	2	2	1	2	1	0	1	2	1	2021-07-09	2021-07-09
P53618	P53618	14	14	14	Coatomer subunit beta	COPB1		1	14	14	14	13	10	7	10	11	13	12	10	12	11	12	10	13	10	7	10	11	13	12	10	12	11	12	10	13	10	7	10	11	13	12	10	12	11	12	10	2021-04-23	2021-04-23
P53621	P53621	27	27	27	Coatomer subunit alpha;Xenin;Proxenin	COPA		1	27	27	27	24	19	18	22	23	25	20	23	24	23	22	23	24	19	18	22	23	25	20	23	24	23	22	23	24	19	18	22	23	25	20	23	24	23	22	23	32.8	32.8
P53634	P53634	9	9	9	Dipeptidyl peptidase 1;Dipeptidyl peptidase 1 exclusion domain chain;Dipeptidyl peptidase 1 heavy chain;Dipeptidyl peptidase 1 light chain	CTSC		1	9	9	9	8	7	7	7	7	7	7	8	8	7	8	7	8	7	7	7	7	7	7	8	8	7	8	7	8	7	7	7	7	7	7	8	8	7	8	7	21	21
P53680	P53680	1	1	1	AP-2 complex subunit sigma	AP2S1		1	1	1	1	1	1	1	1	0	1	1	1	1	0	1	1	1	1	1	1	0	1	1	1	1	0	1	1	1	1	1	1	0	1	1	1	1	0	1	1	2021-03-06	2021-03-06
P53801	P53801	1	1	1	Pituitary tumor-transforming gene 1 protein-interacting protein	PTTG1IP		1	1	1	1	0	0	1	0	0	0	0	0	0	0	0	0	0	0	1	0	0	0	0	0	0	0	0	0	0	0	1	0	0	0	0	0	0	0	0	0	10	10
P53985	P53985	2	2	2	Monocarboxylate transporter 1	SLC16A1		1	2	2	2	0	1	2	2	2	1	1	2	2	2	2	1	0	1	2	2	2	1	1	2	2	2	2	1	0	1	2	2	2	1	1	2	2	2	2	1	2021-04-06	2021-04-06
P53990	P53990	6	6	6	IST1 homolog	IST1		1	6	6	6	4	4	6	4	4	6	4	5	6	4	6	5	4	4	6	4	4	6	4	5	6	4	6	5	4	4	6	4	4	6	4	5	6	4	6	5	2021-09-17	2021-09-17
P53992	P53992	7	7	7	Protein transport protein Sec24C	SEC24C		1	7	7	7	5	6	4	6	5	5	5	6	6	6	7	7	5	6	4	6	5	5	5	6	6	6	7	7	5	6	4	6	5	5	5	6	6	6	7	7	2021-08-09	2021-08-09
P53999	P53999	6	6	6	Activated RNA polymerase II transcriptional coactivator p15	SUB1		1	6	6	6	5	5	6	6	5	6	4	5	5	6	6	5	5	5	6	6	5	6	4	5	5	6	6	5	5	5	6	6	5	6	4	5	5	6	6	5	2021-05-31	2021-05-31
P54105	P54105	1	1	1	Methylosome subunit pICln	CLNS1A		1	1	1	1	1	1	1	1	1	1	1	1	1	1	1	1	1	1	1	1	1	1	1	1	1	1	1	1	1	1	1	1	1	1	1	1	1	1	1	1	2021-05-05	2021-05-05
P54136	P54136	24	24	24	Arginine--tRNA ligase, cytoplasmic	RARS		1	24	24	24	17	18	18	17	20	19	17	19	20	21	18	16	17	18	18	17	20	19	17	19	20	21	18	16	17	18	18	17	20	19	17	19	20	21	18	16	38.6	38.6
P54577	P54577	16	16	16	Tyrosine--tRNA ligase, cytoplasmic;Tyrosine--tRNA ligase, cytoplasmic, N-terminally processed	YARS		1	16	16	16	12	10	12	12	13	12	12	14	13	13	11	13	12	10	12	12	13	12	12	14	13	13	11	13	12	10	12	12	13	12	12	14	13	13	11	13	39.4	39.4
P54578	P54578	8	8	8	Ubiquitin carboxyl-terminal hydrolase 14	USP14		1	8	8	8	4	6	6	6	7	8	5	7	8	6	5	6	4	6	6	6	7	8	5	7	8	6	5	6	4	6	6	6	7	8	5	7	8	6	5	6	2021-08-19	2021-08-19
P54687	P54687	6	6	6	Branched-chain-amino-acid aminotransferase, cytosolic	BCAT1		1	6	6	6	5	5	5	6	6	5	6	6	5	6	6	6	5	5	5	6	6	5	6	6	5	6	6	6	5	5	5	6	6	5	6	6	5	6	6	6	2021-04-18	2021-04-18
P54709	P54709	2	2	2	Sodium/potassium-transporting ATPase subunit beta-3	ATP1B3		1	2	2	2	2	1	2	2	2	2	2	2	2	2	2	2	2	1	2	2	2	2	2	2	2	2	2	2	2	1	2	2	2	2	2	2	2	2	2	2	14	14
P54727	P54727	3	3	3	UV excision repair protein RAD23 homolog B	RAD23B		1	3	3	3	3	2	3	3	2	2	2	3	2	2	2	2	3	2	3	3	2	2	2	3	2	2	2	2	3	2	3	3	2	2	2	3	2	2	2	2	2021-06-15	2021-06-15
P54819	P54819	25	25	25	Adenylate kinase 2, mitochondrial;Adenylate kinase 2, mitochondrial, N-terminally processed	AK2		1	25	25	25	22	22	22	23	22	21	21	23	20	23	22	23	22	22	22	23	22	21	21	23	20	23	22	23	22	22	22	23	22	21	21	23	20	23	22	23	82.8	82.8
P54886	P54886	7	7	7	Delta-1-pyrroline-5-carboxylate synthase;Glutamate 5-kinase;Gamma-glutamyl phosphate reductase	ALDH18A1		1	7	7	7	5	6	6	5	6	6	4	6	6	7	5	5	5	6	6	5	6	6	4	6	6	7	5	5	5	6	6	5	6	6	4	6	6	7	5	5	2021-08-10	2021-08-10
P54920;Q9H115	P54920	13;2	13;2	13;2	Alpha-soluble NSF attachment protein	NAPA		2	13	13	13	10	12	11	13	11	11	10	13	11	13	13	11	10	12	11	13	11	11	10	13	11	13	13	11	10	12	11	13	11	11	10	13	11	13	13	11	57.6	57.6
P55010	P55010	8	8	8	Eukaryotic translation initiation factor 5	EIF5		1	8	8	8	6	5	7	5	8	6	7	7	7	6	6	7	6	5	7	5	8	6	7	7	7	6	6	7	6	5	7	5	8	6	7	7	7	6	6	7	2021-07-16	2021-07-16
P55036;A2A3N6	P55036	8;1	8;1	8;1	26S proteasome non-ATPase regulatory subunit 4	PSMD4		2	8	8	8	6	6	7	7	7	8	5	7	7	8	7	7	6	6	7	7	7	8	5	7	7	8	7	7	6	6	7	7	7	8	5	7	7	8	7	7	33.4	33.4
P55039	P55039	2	2	2	Developmentally-regulated GTP-binding protein 2	DRG2		1	2	2	2	1	2	1	2	1	1	1	2	1	2	2	1	1	2	1	2	1	1	1	2	1	2	2	1	1	2	1	2	1	1	1	2	1	2	2	1	2021-01-09	2021-01-09
P55060	P55060	8	8	8	Exportin-2	CSE1L		1	8	8	8	5	6	5	3	4	4	4	5	3	5	8	6	5	6	5	3	4	4	4	5	3	5	8	6	5	6	5	3	4	4	4	5	3	5	8	6	2021-04-09	2021-04-09
P55072	P55072	46	46	46	Transitional endoplasmic reticulum ATPase	VCP		1	46	46	46	37	40	38	43	43	43	39	42	41	45	44	42	37	40	38	43	43	43	39	42	41	45	44	42	37	40	38	43	43	43	39	42	41	45	44	42	59.4	59.4
P55081	P55081	1	1	1	Microfibrillar-associated protein 1	MFAP1		1	1	1	1	0	0	1	1	1	1	0	1	1	1	1	1	0	0	1	1	1	1	0	1	1	1	1	1	0	0	1	1	1	1	0	1	1	1	1	1	2021-06-04	2021-06-04
P55084	P55084	22	22	22	Trifunctional enzyme subunit beta, mitochondrial;3-ketoacyl-CoA thiolase	HADHB		1	22	22	22	20	19	21	21	19	21	18	20	18	19	19	20	20	19	21	21	19	21	18	20	18	19	19	20	20	19	21	21	19	21	18	20	18	19	19	20	57.6	57.6
P55145	P55145	9	9	9	Mesencephalic astrocyte-derived neurotrophic factor	MANF		1	9	9	9	7	8	9	6	8	9	7	8	7	8	8	7	7	8	9	6	8	9	7	8	7	8	8	7	7	8	9	6	8	9	7	8	7	8	8	7	44	44
P55160;Q9Y2A7	P55160	8;1	8;1	8;1	Nck-associated protein 1-like	NCKAP1L		2	8	8	8	7	7	6	7	7	6	5	6	6	6	7	5	7	7	6	7	7	6	5	6	6	6	7	5	7	7	6	7	7	6	5	6	6	6	7	5	2021-05-06	2021-05-06
P55209	P55209	8	6	6	Nucleosome assembly protein 1-like 1	NAP1L1		1	8	6	6	8	8	8	8	8	8	7	7	8	8	8	8	6	6	6	6	6	6	6	6	6	6	6	6	6	6	6	6	6	6	6	6	6	6	6	6	2021-05-22	2021-09-19
P55263	P55263	8	8	8	Adenosine kinase	ADK		1	8	8	8	6	6	5	7	7	7	6	7	6	8	7	5	6	6	5	7	7	7	6	7	6	8	7	5	6	6	5	7	7	7	6	7	6	8	7	5	33.7	33.7
P55265	P55265	19	19	19	Double-stranded RNA-specific adenosine deaminase	ADAR		1	19	19	19	16	16	15	17	17	15	14	17	16	18	16	16	16	16	15	17	17	15	14	17	16	18	16	16	16	16	15	17	17	15	14	17	16	18	16	16	2021-02-24	2021-02-24
P55735	P55735	3	3	3	Protein SEC13 homolog	SEC13		1	3	3	3	2	3	2	3	2	3	2	3	3	3	3	3	2	3	2	3	2	3	2	3	3	3	3	3	2	3	2	3	2	3	2	3	3	3	3	3	2021-06-18	2021-06-18
P55769	P55769	8	8	8	NHP2-like protein 1;NHP2-like protein 1, N-terminally processed	NHP2L1		1	8	8	8	8	8	8	7	8	8	7	7	7	7	6	7	8	8	8	7	8	8	7	7	7	7	6	7	8	8	8	7	8	8	7	7	7	7	6	7	51.6	51.6
P55786;A6NEC2	P55786	15;6	15;6	15;6	Puromycin-sensitive aminopeptidase	NPEPPS		2	15	15	15	13	12	6	12	11	12	11	12	12	13	14	11	13	12	6	12	11	12	11	12	12	13	14	11	13	12	6	12	11	12	11	12	12	13	14	11	2021-05-24	2021-05-24
P55795	P55795	8	3	3	Heterogeneous nuclear ribonucleoprotein H2	HNRNPH2		1	8	3	3	7	8	8	8	7	8	6	8	8	8	7	8	3	3	3	3	3	3	2	3	3	3	3	3	3	3	3	3	3	3	2	3	3	3	3	3	2021-02-23	2021-01-09
P55809	P55809	4	4	4	Succinyl-CoA:3-ketoacid coenzyme A transferase 1, mitochondrial	OXCT1		1	4	4	4	2	3	2	4	1	3	3	2	2	3	3	3	2	3	2	4	1	3	3	2	2	3	3	3	2	3	2	4	1	3	3	2	2	3	3	3	2021-04-15	2021-04-15
P55884	P55884	6	6	6	Eukaryotic translation initiation factor 3 subunit B	EIF3B		1	6	6	6	5	5	5	4	5	5	5	4	5	5	5	4	5	5	5	4	5	5	5	4	5	5	5	4	5	5	5	4	5	5	5	4	5	5	5	4	2021-03-10	2021-03-10
P55899	P55899	4	4	4	IgG receptor FcRn large subunit p51	FCGRT		1	4	4	4	3	3	3	3	3	3	4	3	3	3	3	3	3	3	3	3	3	3	4	3	3	3	3	3	3	3	3	3	3	3	4	3	3	3	3	3	2021-04-13	2021-04-13
P55957	P55957	5	5	5	BH3-interacting domain death agonist;BH3-interacting domain death agonist p15;BH3-interacting domain death agonist p13;BH3-interacting domain death agonist p11	BID		1	5	5	5	4	5	4	4	5	4	4	5	4	5	5	4	4	5	4	4	5	4	4	5	4	5	5	4	4	5	4	4	5	4	4	5	4	5	5	4	35.9	35.9
P56134	P56134	4	4	4	ATP synthase subunit f, mitochondrial	ATP5J2		1	4	4	4	3	2	3	3	4	4	3	4	4	4	4	3	3	2	3	3	4	4	3	4	4	4	4	3	3	2	3	3	4	4	3	4	4	4	4	3	42.6	42.6
P56192	P56192	7	7	7	Methionine--tRNA ligase, cytoplasmic	MARS		1	7	7	7	2	4	6	5	5	5	6	3	4	5	5	4	2	4	6	5	5	5	6	3	4	5	5	4	2	4	6	5	5	5	6	3	4	5	5	4	2021-03-12	2021-03-12
P56377	P56377	3	3	3	AP-1 complex subunit sigma-2	AP1S2		1	3	3	3	2	2	2	2	2	2	2	2	2	2	3	2	2	2	2	2	2	2	2	2	2	2	3	2	2	2	2	2	2	2	2	2	2	2	3	2	2021-07-21	2021-07-21
P56385	P56385	3	3	3	ATP synthase subunit e, mitochondrial	ATP5I		1	3	3	3	3	3	3	3	3	2	3	2	3	3	3	3	3	3	3	3	3	2	3	2	3	3	3	3	3	3	3	3	3	2	3	2	3	3	3	3	34.8	34.8
P56537	P56537	7	7	7	Eukaryotic translation initiation factor 6	EIF6		1	7	7	7	5	4	6	7	4	6	4	5	5	6	7	6	5	4	6	7	4	6	4	5	5	6	7	6	5	4	6	7	4	6	4	5	5	6	7	6	46.1	46.1
P56556	P56556	1	1	1	NADH dehydrogenase [ubiquinone] 1 alpha subcomplex subunit 6	NDUFA6		1	1	1	1	1	1	1	1	1	1	1	1	1	1	1	1	1	1	1	1	1	1	1	1	1	1	1	1	1	1	1	1	1	1	1	1	1	1	1	1	2021-02-06	2021-02-06
P57088	P57088	1	1	1	Transmembrane protein 33	TMEM33		1	1	1	1	1	1	1	1	1	1	1	1	1	1	1	1	1	1	1	1	1	1	1	1	1	1	1	1	1	1	1	1	1	1	1	1	1	1	1	1	2021-09-04	2021-09-04
P57737	P57737	14	14	14	Coronin-7	CORO7		1	14	14	14	12	14	12	13	13	12	12	13	14	14	13	14	12	14	12	13	13	12	12	13	14	14	13	14	12	14	12	13	13	12	12	13	14	14	13	14	2021-06-25	2021-06-25
P57740	P57740	4	4	4	Nuclear pore complex protein Nup107	NUP107		1	4	4	4	3	2	3	2	2	2	2	2	3	3	1	3	3	2	3	2	2	2	2	2	3	3	1	3	3	2	3	2	2	2	2	2	3	3	1	3	2021-05-06	2021-05-06
P57764	P57764	7	7	7	Gasdermin-D	GSDMD		1	7	7	7	7	7	3	5	7	4	5	4	6	7	7	6	7	7	3	5	7	4	5	4	6	7	7	6	7	7	3	5	7	4	5	4	6	7	7	6	2021-03-22	2021-03-22
P58546	P58546	6	6	6	Myotrophin	MTPN		1	6	6	6	6	6	5	5	6	6	6	6	6	6	6	6	6	6	5	5	6	6	6	6	6	6	6	6	6	6	5	5	6	6	6	6	6	6	6	6	75.4	75.4
P59923	P59923	1	1	1	Zinc finger protein 445	ZNF445		1	1	1	1	0	1	1	1	0	1	1	0	1	1	0	0	0	1	1	1	0	1	1	0	1	1	0	0	0	1	1	1	0	1	1	0	1	1	0	0	2021-01-01	2021-01-01
P59998	P59998	11	11	11	Actin-related protein 2/3 complex subunit 4	ARPC4		1	11	11	11	11	11	11	11	11	11	11	11	11	10	11	11	11	11	11	11	11	11	11	11	11	10	11	11	11	11	11	11	11	11	11	11	11	10	11	11	58.9	58.9
P60033	P60033	1	1	1	CD81 antigen	CD81		1	1	1	1	1	1	1	1	1	1	1	1	1	1	0	1	1	1	1	1	1	1	1	1	1	1	0	1	1	1	1	1	1	1	1	1	1	1	0	1	2021-07-09	2021-07-09
P60059	P60059	1	1	1	Protein transport protein Sec61 subunit gamma	SEC61G		1	1	1	1	1	1	1	1	1	1	1	1	1	1	1	1	1	1	1	1	1	1	1	1	1	1	1	1	1	1	1	1	1	1	1	1	1	1	1	1	2021-06-17	2021-06-17
P60174	P60174	24	24	24	Triosephosphate isomerase	TPI1		1	24	24	24	24	23	23	23	23	22	22	24	24	23	24	23	24	23	23	23	23	22	22	24	24	23	24	23	24	23	23	23	23	22	22	24	24	23	24	23	74.5	74.5
P60228	P60228	8	8	8	Eukaryotic translation initiation factor 3 subunit E	EIF3E		1	8	8	8	8	8	7	8	8	8	8	8	8	8	8	7	8	8	7	8	8	8	8	8	8	8	8	7	8	8	7	8	8	8	8	8	8	8	8	7	2021-03-21	2021-03-21
P60468	P60468	2	2	2	Protein transport protein Sec61 subunit beta	SEC61B		1	2	2	2	2	2	2	1	2	2	2	1	1	2	2	2	2	2	2	1	2	2	2	1	1	2	2	2	2	2	2	1	2	2	2	1	1	2	2	2	2021-01-27	2021-01-27
P60510	P60510	1	1	1	Serine/threonine-protein phosphatase 4 catalytic subunit	PPP4C		1	1	1	1	0	0	0	0	1	1	0	1	0	0	1	0	0	0	0	0	1	1	0	1	0	0	1	0	0	0	0	0	1	1	0	1	0	0	1	0	2021-06-03	2021-06-03
P60604	P60604	2	2	2	Ubiquitin-conjugating enzyme E2 G2	UBE2G2		1	2	2	2	1	1	1	2	1	1	1	1	1	2	1	2	1	1	1	2	1	1	1	1	1	2	1	2	1	1	1	2	1	1	1	1	1	2	1	2	2021-09-27	2021-09-27
P60660	P60660	10	10	8	Myosin light polypeptide 6	MYL6		1	10	10	8	8	10	9	9	9	9	9	9	8	8	9	8	8	10	9	9	9	9	9	9	8	8	9	8	6	8	7	7	7	7	7	7	6	6	7	6	64.2	64.2
P60709;Q6S8J3;A5A3E0;P0CG38;P0CG39;Q9BYX7	P60709	51;14;10;9;7;4	51;14;10;9;7;4	1;0;0;0;0;0	Actin, cytoplasmic 1;Actin, cytoplasmic 1, N-terminally processed	ACTB		6	51	51	1	49	49	47	48	49	48	49	51	49	51	49	48	49	49	47	48	49	48	49	51	49	51	49	48	1	1	1	1	1	1	1	1	1	1	1	1	99.2	99.2
063;172064;172065;172066;172067;172068;172069;172070;172071;172072;172073;172074;172075;172076;172077;172078;172079;172080;172081;172082;172083;172084;172085;172086;172087;172088;172089;176542;176543;176544;176545;176546;176547;176548;176549;176550;176551;176552;176553;176554;176555;176556;176557;176558;176559;176560;176561;176562;176563;176564;176565;176566;176567;176568;176569;176570;176571;176…	6256;15272;21118;21217;23608;23687;24426;25783;27189;29258;29740;31218;31294;36133;36279;36288;36581;36720;48074;65161;65268;65301;68900;68940;69045;74895;76687;76698;79023;79051;86112;87586;95241;98660;98738;99257;99527;124116;125152;136235;136252;140740;159457;171752;176703;176721;176734;199809;200661;200663;200666	258;259;260;261;262;263;264;265;266;267;268;269;270;271	16;44;47;119;123;132;153;190;227;269;283;305;313;325
P60842	P60842	17	15	10	Eukaryotic initiation factor 4A-I	EIF4A1		1	17	15	10	16	16	12	15	16	15	15	14	14	14	16	16	14	14	10	13	14	13	13	12	12	12	14	14	9	10	6	8	10	9	8	8	8	8	9	10	47.5	41.6
P60866	P60866	7	7	7	40S ribosomal protein S20	RPS20		1	7	7	7	6	5	7	5	6	6	5	6	7	6	6	6	6	5	7	5	6	6	5	6	7	6	6	6	6	5	7	5	6	6	5	6	7	6	6	6	46.2	46.2
P60891;P21108	P60891	8;3	8;3	4;1	Ribose-phosphate pyrophosphokinase 1	PRPS1		2	8	8	4	8	7	7	6	6	6	6	7	7	7	8	6	8	7	7	6	6	6	6	7	7	7	8	6	4	4	3	3	4	4	3	4	4	3	4	3	39.6	39.6
P60900	P60900	15	15	15	Proteasome subunit alpha type-6	PSMA6		1	15	15	15	14	15	15	15	14	15	14	15	15	14	15	15	14	15	15	15	14	15	14	15	15	14	15	15	14	15	15	15	14	15	14	15	15	14	15	15	56.5	56.5
P60903	P60903	6	6	6	Protein S100-A10	S100A10		1	6	6	6	6	5	6	5	6	6	6	6	5	6	5	6	6	5	6	5	6	6	6	6	5	6	5	6	6	5	6	5	6	6	6	6	5	6	5	6	57.7	57.7
P60953	P60953	12	12	11	Cell division control protein 42 homolog	CDC42		1	12	12	11	10	11	9	11	10	11	10	12	12	12	11	12	10	11	9	11	10	11	10	12	12	12	11	12	10	10	8	10	10	10	9	11	11	11	10	11	61.8	61.8
P60981	P60981	4	1	1	Destrin	DSTN		1	4	1	1	4	4	4	4	4	4	4	4	4	4	4	4	1	1	1	1	1	1	1	1	1	1	1	1	1	1	1	1	1	1	1	1	1	1	1	1	2021-05-14	2021-03-07
P60983	P60983	6	3	3	Glia maturation factor beta	GMFB		1	6	3	3	5	4	4	5	4	4	4	5	5	5	5	4	2	2	1	2	2	1	2	2	2	2	2	1	2	2	1	2	2	1	2	2	2	2	2	1	59.9	31
P61006	P61006	6	5	5	Ras-related protein Rab-8A	RAB8A		1	6	5	5	6	5	6	5	6	6	6	6	6	5	6	6	5	4	5	4	5	5	5	5	5	4	5	5	5	4	5	4	5	5	5	5	5	4	5	5	29	2021-07-23
P61011	P61011	3	3	3	Signal recognition particle 54 kDa protein	SRP54		1	3	3	3	3	2	3	2	2	2	1	3	2	3	3	3	3	2	3	2	2	2	1	3	2	3	3	3	3	2	3	2	2	2	1	3	2	3	3	3	2021-03-07	2021-03-07
P61019	P61019	10	10	5	Ras-related protein Rab-2A	RAB2A		1	10	10	5	9	10	10	10	10	10	10	10	10	10	10	9	9	10	10	10	10	10	10	10	10	10	10	9	4	5	5	5	5	5	5	5	5	5	5	4	48.1	48.1
P61020	P61020	6	4	4	Ras-related protein Rab-5B	RAB5B		1	6	4	4	5	6	5	5	6	6	5	5	6	6	6	6	4	4	4	3	4	4	4	4	4	4	4	4	4	4	4	3	4	4	4	4	4	4	4	4	37.2	2021-04-27
P61026	P61026	6	5	4	Ras-related protein Rab-10	RAB10		1	6	5	4	5	6	5	6	6	6	6	6	6	5	5	5	4	5	4	5	5	5	5	5	5	4	4	4	3	4	3	4	4	4	4	4	4	3	3	3	2021-05-24	19
P62837;P61077	P62837;P61077	2;2	2;2	2;2	Ubiquitin-conjugating enzyme E2 D2;Ubiquitin-conjugating enzyme E2 D3	UBE2D2;UBE2D3	;	2	2	2	2	2	2	2	2	2	2	2	2	2	2	2	2	2	2	2	2	2	2	2	2	2	2	2	2	2	2	2	2	2	2	2	2	2	2	2	2	2021-08-23	2021-08-23
P61081	P61081	5	5	5	NEDD8-conjugating enzyme Ubc12	UBE2M		1	5	5	5	4	5	4	5	4	4	4	5	4	5	5	5	4	5	4	5	4	4	4	5	4	5	5	5	4	5	4	5	4	4	4	5	4	5	5	5	2021-07-31	2021-07-31
P61086	P61086	5	5	5	Ubiquitin-conjugating enzyme E2 K	UBE2K		1	5	5	5	4	4	2	3	3	3	3	2	4	4	3	3	4	4	2	3	3	3	3	2	4	4	3	3	4	4	2	3	3	3	3	2	4	4	3	3	27	27
P61088;Q5JXB2	P61088	7;3	7;3	7;3	Ubiquitin-conjugating enzyme E2 N	UBE2N		2	7	7	7	6	7	7	7	6	6	5	6	7	6	7	6	6	7	7	7	6	6	5	6	7	6	7	6	6	7	7	7	6	6	5	6	7	6	7	6	53.9	53.9
P61106	P61106	12	12	12	Ras-related protein Rab-14	RAB14		1	12	12	12	10	12	12	11	12	11	10	12	12	12	12	12	10	12	12	11	12	11	10	12	12	12	12	12	10	12	12	11	12	11	10	12	12	12	12	12	67.4	67.4
P61158;Q9P1U1;Q9C0K3	P61158	31;4;2	31;4;2	31;4;2	Actin-related protein 3	ACTR3		3	31	31	31	28	28	26	30	30	27	28	28	26	30	29	30	28	28	26	30	30	27	28	28	26	30	29	30	28	28	26	30	30	27	28	28	26	30	29	30	71.1	71.1
P61160	P61160	19	19	19	Actin-related protein 2	ACTR2		1	19	19	19	16	16	14	18	14	15	14	15	17	16	19	16	16	16	14	18	14	15	14	15	17	16	19	16	16	16	14	18	14	15	14	15	17	16	19	16	61.4	61.4
P61163	P61163	12	12	8	Alpha-centractin	ACTR1A		1	12	12	8	8	11	10	10	9	12	7	10	12	10	10	11	8	11	10	10	9	12	7	10	12	10	10	11	4	7	6	6	5	8	3	6	8	6	6	7	52.1	52.1
P61201	P61201	3	3	3	COP9 signalosome complex subunit 2	COPS2		1	3	3	3	3	3	2	3	3	3	3	3	3	3	3	3	3	3	2	3	3	3	3	3	3	3	3	3	3	3	2	3	3	3	3	3	3	3	3	3	2021-06-08	2021-06-08
P84077;P61204	P84077;P61204	10;10	10;10	6;6	ADP-ribosylation factor 1;ADP-ribosylation factor 3	ARF1;ARF3	;	2	10	10	6	7	5	5	9	8	7	8	8	7	8	9	6	7	5	5	9	8	7	8	8	7	8	9	6	4	3	4	5	5	4	5	4	3	4	5	4	68.5	68.5
P61221	P61221	10	10	10	ATP-binding cassette sub-family E member 1	ABCE1		1	10	10	10	10	9	8	9	10	8	5	8	8	8	8	8	10	9	8	9	10	8	5	8	8	8	8	8	10	9	8	9	10	8	5	8	8	8	8	8	2021-04-21	2021-04-21
P61224;A6NIZ1	P61224;A6NIZ1	15;11	15;11	4;3	Ras-related protein Rap-1b;Ras-related protein Rap-1b-like protein	RAP1B	;	2	15	15	4	12	14	12	12	13	13	14	13	13	14	14	11	12	14	12	12	13	13	14	13	13	14	14	11	2	4	2	2	3	3	3	2	2	3	4	2	67.4	67.4
P61225;P10114	P61225	5;2	5;2	3;0	Ras-related protein Rap-2b	RAP2B		2	5	5	3	4	5	4	5	5	5	3	4	4	5	4	3	4	5	4	5	5	5	3	4	4	5	4	3	3	3	3	3	3	3	2	3	2	3	2	2	36.6	36.6
P61247	P61247	26	26	26	40S ribosomal protein S3a	RPS3A		1	26	26	26	24	24	22	25	23	22	21	24	26	24	24	24	24	24	22	25	23	22	21	24	26	24	24	24	24	24	22	25	23	22	21	24	26	24	24	24	69.3	69.3
P61254	P61254	8	8	1	60S ribosomal protein L26	RPL26		1	8	8	1	5	6	6	6	6	6	6	6	6	6	6	6	5	6	6	6	6	6	6	6	6	6	6	6	0	0	1	0	0	0	0	0	0	0	0	1	35.2	35.2
P61289	P61289	5	5	5	Proteasome activator complex subunit 3	PSME3		1	5	5	5	4	4	5	4	4	5	5	4	4	5	5	5	4	4	5	4	4	5	5	4	4	5	5	5	4	4	5	4	4	5	5	4	4	5	5	5	2021-07-21	2021-07-21
P61313	P61313	9	9	9	60S ribosomal protein L15	RPL15		1	9	9	9	9	9	7	9	9	7	8	8	9	8	7	8	9	9	7	9	9	7	8	8	9	8	7	8	9	9	7	9	9	7	8	8	9	8	7	8	39.7	39.7
P61326;Q96A72	P61326;Q96A72	3;2	3;2	3;2	Protein mago nashi homolog;Protein mago nashi homolog 2	MAGOH;MAGOHB	;	2	3	3	3	1	0	2	3	0	3	1	2	1	2	1	0	1	0	2	3	0	3	1	2	1	2	1	0	1	0	2	3	0	3	1	2	1	2	1	0	33.6	33.6
P61353	P61353	4	4	4	60S ribosomal protein L27	RPL27		1	4	4	4	4	4	4	4	4	4	4	4	4	4	4	4	4	4	4	4	4	4	4	4	4	4	4	4	4	4	4	4	4	4	4	4	4	4	4	4	40.4	40.4
P61421	P61421	10	10	10	V-type proton ATPase subunit d 1	ATP6V0D1		1	10	10	10	9	9	7	8	7	9	7	7	8	8	8	8	9	9	7	8	7	9	7	7	8	8	8	8	9	9	7	8	7	9	7	7	8	8	8	8	34.5	34.5
P61513;A6NKH3	P61513	3;1	3;1	3;1	60S ribosomal protein L37a	RPL37A		2	3	3	3	3	3	3	3	3	3	3	3	3	3	3	3	3	3	3	3	3	3	3	3	3	3	3	3	3	3	3	3	3	3	3	3	3	3	3	3	41.3	41.3
P61586	P61586	12	12	4	Transforming protein RhoA	RHOA		1	12	12	4	12	12	9	12	11	11	11	11	11	12	10	10	12	12	9	12	11	11	11	11	11	12	10	10	4	4	2	4	3	3	3	3	4	4	2	3	57.5	57.5
P61604	P61604	16	16	16	10 kDa heat shock protein, mitochondrial	HSPE1		1	16	16	16	15	15	14	15	15	15	15	15	15	16	15	14	15	15	14	15	15	15	15	15	15	16	15	14	15	15	14	15	15	15	15	15	15	16	15	14	94.1	94.1
P61619	P61619	2	2	2	Protein transport protein Sec61 subunit alpha isoform 1	SEC61A1		1	2	2	2	2	2	2	2	2	2	2	2	2	2	2	2	2	2	2	2	2	2	2	2	2	2	2	2	2	2	2	2	2	2	2	2	2	2	2	2	2021-03-06	2021-03-06
P61758	P61758	6	6	6	Prefoldin subunit 3	VBP1		1	6	6	6	4	5	2	5	4	3	3	5	5	4	5	4	4	5	2	5	4	3	3	5	5	4	5	4	4	5	2	5	4	3	3	5	5	4	5	4	36.5	36.5
P61769	P61769	3	3	3	Beta-2-microglobulin;Beta-2-microglobulin form pI 5.3	B2M		1	3	3	3	2	2	1	2	3	3	2	3	3	2	3	2	2	2	1	2	3	3	2	3	3	2	3	2	2	2	1	2	3	3	2	3	3	2	3	2	46.2	46.2
P61803	P61803	3	3	3	Dolichyl-diphosphooligosaccharide--protein glycosyltransferase subunit DAD1	DAD1		1	3	3	3	2	2	2	3	3	3	3	2	3	2	2	3	2	2	2	3	3	3	3	2	3	2	2	3	2	2	2	3	3	3	3	2	3	2	2	3	38.1	38.1
P61916	P61916	13	13	13	Epididymal secretory protein E1	NPC2		1	13	13	13	13	13	13	11	13	12	13	13	13	13	12	12	13	13	13	11	13	12	13	13	13	13	12	12	13	13	13	11	13	12	13	13	13	13	12	12	53.6	53.6
P61923	P61923	4	4	4	Coatomer subunit zeta-1	COPZ1		1	4	4	4	3	4	4	4	4	4	4	4	4	4	4	4	3	4	4	4	4	4	4	4	4	4	4	4	3	4	4	4	4	4	4	4	4	4	4	4	36.7	36.7
P61956;Q6EEV6;P55854	P61956;Q6EEV6;P55854	2;1;1	2;1;1	2;1;1	Small ubiquitin-related modifier 2;Small ubiquitin-related modifier 4;Small ubiquitin-related modifier 3	SUMO2;SUMO4;SUMO3	;;	3	2	2	2	1	1	2	2	2	2	1	2	2	2	2	2	1	1	2	2	2	2	1	2	2	2	2	2	1	1	2	2	2	2	1	2	2	2	2	2	2021-02-23	2021-02-23
P61960	P61960	3	3	3	Ubiquitin-fold modifier 1	UFM1		1	3	3	3	1	3	1	2	1	2	3	2	2	3	3	3	1	3	1	2	1	2	3	2	2	3	3	3	1	3	1	2	1	2	3	2	2	3	3	3	55.3	55.3
P61964	P61964	3	3	3	WD repeat-containing protein 5	WDR5		1	3	3	3	2	3	2	3	2	2	2	3	2	2	3	2	2	3	2	3	2	2	2	3	2	2	3	2	2	3	2	3	2	2	2	3	2	2	3	2	2021-03-12	2021-03-12
P61970	P61970	4	4	4	Nuclear transport factor 2	NUTF2		1	4	4	4	3	3	4	3	4	3	4	3	4	4	4	4	3	3	4	3	4	3	4	3	4	4	4	4	3	3	4	3	4	3	4	3	4	4	4	4	51.2	51.2
P61978	P61978	32	32	32	Heterogeneous nuclear ribonucleoprotein K	HNRNPK		1	32	32	32	30	31	28	30	27	31	25	29	27	30	29	28	30	31	28	30	27	31	25	29	27	30	29	28	30	31	28	30	27	31	25	29	27	30	29	28	65.4	65.4
P61981	P61981	20	14	14	14-3-3 protein gamma;14-3-3 protein gamma, N-terminally processed	YWHAG		1	20	14	14	17	17	16	18	18	16	14	13	17	15	17	14	11	12	11	13	12	10	9	9	11	11	12	9	11	12	11	13	12	10	9	9	11	11	12	9	74.9	61.1
P62081	P62081	14	14	14	40S ribosomal protein S7	RPS7		1	14	14	14	12	11	11	13	13	13	12	13	14	11	12	14	12	11	11	13	13	13	12	13	14	11	12	14	12	11	11	13	13	13	12	13	14	11	12	14	59.3	59.3
P62136	P62136	12	12	3	Serine/threonine-protein phosphatase PP1-alpha catalytic subunit	PPP1CA		1	12	12	3	9	10	10	10	10	10	9	10	10	11	10	9	9	10	10	10	10	10	9	10	10	11	10	9	2	3	3	3	3	3	3	3	3	3	3	3	41.8	41.8
P62140	P62140	11	3	3	Serine/threonine-protein phosphatase PP1-beta catalytic subunit	PPP1CB		1	11	3	3	8	7	7	8	9	8	7	8	8	8	7	8	2	1	1	2	3	2	1	2	2	1	1	2	2	1	1	2	3	2	1	2	2	1	1	2	38.8	2021-07-10
P62191	P62191	14	14	14	26S protease regulatory subunit 4	PSMC1		1	14	14	14	9	13	10	11	11	13	11	11	9	12	14	9	9	13	10	11	11	13	11	11	9	12	14	9	9	13	10	11	11	13	11	11	9	12	14	9	42.3	42.3
P62195	P62195	18	18	17	26S protease regulatory subunit 8	PSMC5		1	18	18	17	16	17	16	17	17	17	15	17	18	17	18	17	16	17	16	17	17	17	15	17	18	17	18	17	15	16	15	16	16	16	14	16	17	16	17	16	58.9	58.9
P62241	P62241	15	15	15	40S ribosomal protein S8	RPS8		1	15	15	15	13	14	14	14	15	15	12	15	15	15	15	14	13	14	14	14	15	15	12	15	15	15	15	14	13	14	14	14	15	15	12	15	15	15	15	14	60.6	60.6
P62244	P62244	8	8	8	40S ribosomal protein S15a	RPS15A		1	8	8	8	8	7	6	8	7	7	7	7	8	7	7	7	8	7	6	8	7	7	7	7	8	7	7	7	8	7	6	8	7	7	7	7	8	7	7	7	46.9	46.9
P62249	P62249	8	8	8	40S ribosomal protein S16	RPS16		1	8	8	8	7	8	6	8	7	7	7	8	7	7	8	8	7	8	6	8	7	7	7	8	7	7	8	8	7	8	6	8	7	7	7	8	7	7	8	8	2021-05-31	2021-05-31
P62258	P62258	13	11	11	14-3-3 protein epsilon	YWHAE		1	13	11	11	10	11	10	11	11	12	10	11	11	11	11	11	8	9	8	9	9	10	8	9	9	9	9	9	8	9	8	9	9	10	8	9	9	9	9	9	65.1	61.2
P62263	P62263	8	8	8	40S ribosomal protein S14	RPS14		1	8	8	8	8	7	7	7	8	8	7	7	7	7	7	7	8	7	7	7	8	8	7	7	7	7	7	7	8	7	7	7	8	8	7	7	7	7	7	7	35.1	35.1
P62266	P62266	5	5	5	40S ribosomal protein S23	RPS23		1	5	5	5	5	5	5	5	5	5	4	5	5	5	5	5	5	5	5	5	5	5	4	5	5	5	5	5	5	5	5	5	5	5	4	5	5	5	5	5	48.3	48.3
P62269	P62269	11	11	11	40S ribosomal protein S18	RPS18		1	11	11	11	9	7	9	9	9	9	8	9	7	8	9	8	9	7	9	9	9	9	8	9	7	8	9	8	9	7	9	9	9	9	8	9	7	8	9	8	49.3	49.3
P62273	P62273	2	2	2	40S ribosomal protein S29	RPS29		1	2	2	2	2	2	2	2	2	2	2	2	2	2	2	2	2	2	2	2	2	2	2	2	2	2	2	2	2	2	2	2	2	2	2	2	2	2	2	2	33.9	33.9
P62277	P62277	16	16	16	40S ribosomal protein S13	RPS13		1	16	16	16	14	14	14	16	15	15	14	14	15	15	15	15	14	14	14	16	15	15	14	14	15	15	15	15	14	14	14	16	15	15	14	14	15	15	15	15	64.9	64.9
P62280	P62280	13	13	13	40S ribosomal protein S11	RPS11		1	13	13	13	9	11	11	11	11	11	12	12	11	12	12	11	9	11	11	11	11	11	12	12	11	12	12	11	9	11	11	11	11	11	12	12	11	12	12	11	64.6	64.6
P62304	P62304	3	3	3	Small nuclear ribonucleoprotein E	SNRPE		1	3	3	3	3	3	3	3	3	3	3	3	2	3	3	3	3	3	3	3	3	3	3	3	2	3	3	3	3	3	3	3	3	3	3	3	2	3	3	3	2021-03-29	2021-03-29
P62306	P62306	2	2	2	Small nuclear ribonucleoprotein F	SNRPF		1	2	2	2	2	2	2	2	2	2	2	2	2	2	2	2	2	2	2	2	2	2	2	2	2	2	2	2	2	2	2	2	2	2	2	2	2	2	2	2	2021-04-24	2021-04-24
P62310	P62310	4	4	4	U6 snRNA-associated Sm-like protein LSm3	LSM3		1	4	4	4	4	3	4	4	4	3	4	4	4	3	4	4	4	3	4	4	4	3	4	4	4	3	4	4	4	3	4	4	4	3	4	4	4	3	4	4	42.2	42.2
P62314	P62314	3	3	3	Small nuclear ribonucleoprotein Sm D1	SNRPD1		1	3	3	3	2	3	1	1	2	2	2	3	1	3	3	1	2	3	1	1	2	2	2	3	1	3	3	1	2	3	1	1	2	2	2	3	1	3	3	1	37	37
P62316	P62316	10	10	10	Small nuclear ribonucleoprotein Sm D2	SNRPD2		1	10	10	10	8	8	9	9	9	9	9	9	9	10	9	9	8	8	9	9	9	9	9	9	9	10	9	9	8	8	9	9	9	9	9	9	9	10	9	9	64.4	64.4
P62318	P62318	6	6	6	Small nuclear ribonucleoprotein Sm D3	SNRPD3		1	6	6	6	6	6	6	6	6	6	5	6	6	6	5	6	6	6	6	6	6	6	5	6	6	6	5	6	6	6	6	6	6	6	5	6	6	6	5	6	38.9	38.9
P62328	P62328	9	9	8	Thymosin beta-4;Hematopoietic system regulatory peptide	TMSB4X		1	9	9	8	9	9	9	9	9	9	9	9	9	8	9	9	9	9	9	9	9	9	9	9	9	8	9	9	8	8	8	8	8	8	8	8	8	8	8	8	88.6	88.6
P62330	P62330	2	2	2	ADP-ribosylation factor 6	ARF6		1	2	2	2	1	2	0	2	2	2	0	2	2	2	2	2	1	2	0	2	2	2	0	2	2	2	2	2	1	2	0	2	2	2	0	2	2	2	2	2	2021-03-30	2021-03-30
P62333	P62333	16	16	16	26S protease regulatory subunit 10B	PSMC6		1	16	16	16	14	14	12	14	15	15	12	14	16	15	15	15	14	14	12	14	15	15	12	14	16	15	15	15	14	14	12	14	15	15	12	14	16	15	15	15	49.1	49.1
P62424	P62424	18	18	18	60S ribosomal protein L7a	RPL7A		1	18	18	18	17	17	15	16	16	17	17	17	17	17	18	17	17	17	15	16	16	17	17	17	17	17	18	17	17	17	15	16	16	17	17	17	17	17	18	17	54.1	54.1
P62495	P62495	6	6	6	Eukaryotic peptide chain release factor subunit 1	ETF1		1	6	6	6	4	6	6	6	6	5	5	6	6	6	6	6	4	6	6	6	6	5	5	6	6	6	6	6	4	6	6	6	6	5	5	6	6	6	6	6	2021-06-17	2021-06-17
P62633	P62633	1	1	1	Cellular nucleic acid-binding protein	CNBP		1	1	1	1	1	1	1	1	1	1	0	1	1	1	1	1	1	1	1	1	1	1	0	1	1	1	1	1	1	1	1	1	1	1	0	1	1	1	1	1	2021-05-04	2021-05-04
P62701	P62701	18	18	11	40S ribosomal protein S4, X isoform	RPS4X		1	18	18	11	15	17	13	16	16	15	15	16	16	16	16	17	15	17	13	16	16	15	15	16	16	16	16	17	9	10	9	10	10	10	9	10	10	10	10	10	65.4	65.4
P62750	P62750	8	8	8	60S ribosomal protein L23a	RPL23A		1	8	8	8	8	8	8	8	8	8	7	8	8	8	8	8	8	8	8	8	8	8	7	8	8	8	8	8	8	8	8	8	8	8	7	8	8	8	8	8	46.8	46.8
P62753	P62753	11	11	11	40S ribosomal protein S6	RPS6		1	11	11	11	11	9	9	9	11	11	11	10	11	10	10	11	11	9	9	9	11	11	11	10	11	10	10	11	11	9	9	9	11	11	11	10	11	10	10	11	44.2	44.2
P62805	P62805	22	22	22	Histone H4	HIST1H4A		1	22	22	22	21	22	21	22	21	21	20	21	21	21	21	21	21	22	21	22	21	21	20	21	21	21	21	21	21	22	21	22	21	21	20	21	21	21	21	21	71.8	71.8
P62820;P59190	P62820	13;1	13;1	7;0	Ras-related protein Rab-1A	RAB1A		2	13	13	7	11	11	11	12	11	12	11	11	10	11	12	12	11	11	11	12	11	12	11	11	10	11	12	12	6	7	7	7	6	6	6	6	6	7	7	7	64.4	64.4
P62826	P62826	16	16	16	GTP-binding nuclear protein Ran	RAN		1	16	16	16	15	15	14	15	15	13	13	13	14	16	16	15	15	15	14	15	15	13	13	13	14	16	16	15	15	15	14	15	15	13	13	13	14	16	16	15	53.2	53.2
P62829	P62829	10	10	10	60S ribosomal protein L23	RPL23		1	10	10	10	9	9	7	9	10	9	9	10	10	9	10	9	9	9	7	9	10	9	9	10	10	9	10	9	9	9	7	9	10	9	9	10	10	9	10	9	47.9	47.9
P62834	P62834	14	3	3	Ras-related protein Rap-1A	RAP1A		1	14	3	3	11	12	11	12	12	13	12	13	13	13	13	12	1	2	1	2	2	3	1	2	2	2	3	3	1	2	1	2	2	3	1	2	2	2	3	3	59.2	2021-07-21
P62841	P62841	3	3	3	40S ribosomal protein S15	RPS15		1	3	3	3	2	2	3	2	2	3	3	3	3	2	2	3	2	2	3	2	2	3	3	3	3	2	2	3	2	2	3	2	2	3	3	3	3	2	2	3	35.9	35.9
P62847	P62847	3	3	3	40S ribosomal protein S24	RPS24		1	3	3	3	3	3	2	2	3	3	2	3	2	2	3	2	3	3	2	2	3	3	2	3	2	2	3	2	3	3	2	2	3	3	2	3	2	2	3	2	2021-03-26	2021-03-26
P62851	P62851	4	4	4	40S ribosomal protein S25	RPS25		1	4	4	4	3	4	3	4	3	3	3	3	3	3	4	4	3	4	3	4	3	3	3	3	3	3	4	4	3	4	3	4	3	3	3	3	3	3	4	4	2021-06-25	2021-06-25
P62854;Q5JNZ5	P62854	3;1	3;1	3;1	40S ribosomal protein S26	RPS26		2	3	3	3	3	3	2	3	3	3	2	3	3	3	3	3	3	3	2	3	3	3	2	3	3	3	3	3	3	3	2	3	3	3	2	3	3	3	3	3	2021-09-20	2021-09-20
P62857	P62857	8	8	8	40S ribosomal protein S28	RPS28		1	8	8	8	8	7	7	8	8	8	8	8	8	8	8	8	8	7	7	8	8	8	8	8	8	8	8	8	8	7	7	8	8	8	8	8	8	8	8	8	60.9	60.9
P62861	P62861	3	3	3	40S ribosomal protein S30	FAU		1	3	3	3	3	3	2	2	3	3	3	3	3	3	3	3	3	3	2	2	3	3	3	3	3	3	3	3	3	3	2	2	3	3	3	3	3	3	3	3	2021-03-20	2021-03-20
P62873	P62873	12	12	8	Guanine nucleotide-binding protein G(I)/G(S)/G(T) subunit beta-1	GNB1		1	12	12	8	11	12	11	12	11	11	11	12	11	12	11	12	11	12	11	12	11	11	11	12	11	12	11	12	8	8	8	8	8	8	7	8	8	8	8	8	49.7	49.7
P62875	P62875	2	2	2	DNA-directed RNA polymerases I, II, and III subunit RPABC5	POLR2L		1	2	2	2	2	2	2	2	2	2	2	2	2	2	2	2	2	2	2	2	2	2	2	2	2	2	2	2	2	2	2	2	2	2	2	2	2	2	2	2	2021-09-29	2021-09-29
P62879	P62879	11	7	5	Guanine nucleotide-binding protein G(I)/G(S)/G(T) subunit beta-2	GNB2		1	11	7	5	10	11	8	11	10	9	11	10	10	11	10	11	7	7	5	7	7	6	7	6	7	7	7	7	5	5	3	5	5	4	5	4	5	5	5	5	48.5	2021-06-30
P62888	P62888	5	5	5	60S ribosomal protein L30	RPL30		1	5	5	5	5	4	5	5	5	5	5	5	5	5	5	5	5	4	5	5	5	5	5	5	5	5	5	5	5	4	5	5	5	5	5	5	5	5	5	5	59.1	59.1
Q59GN2;P62891	Q59GN2;P62891	1;1	1;1	1;1	Putative 60S ribosomal protein L39-like 5;60S ribosomal protein L39	RPL39P5;RPL39	;	2	1	1	1	0	1	0	1	0	0	1	1	1	1	1	1	0	1	0	1	0	0	1	1	1	1	1	1	0	1	0	1	0	0	1	1	1	1	1	1	2021-06-19	2021-06-19
P62899	P62899	5	5	5	60S ribosomal protein L31	RPL31		1	5	5	5	4	4	5	3	4	5	4	3	4	4	5	3	4	4	5	3	4	5	4	3	4	4	5	3	4	4	5	3	4	5	4	3	4	4	5	3	47.2	47.2
P62906	P62906	11	11	11	60S ribosomal protein L10a	RPL10A		1	11	11	11	10	9	10	10	10	10	9	10	8	10	9	9	10	9	10	10	10	10	9	10	8	10	9	9	10	9	10	10	10	10	9	10	8	10	9	9	43.3	43.3
P62910	P62910	5	5	5	60S ribosomal protein L32	RPL32		1	5	5	5	4	5	3	4	4	4	4	5	4	4	5	4	4	5	3	4	4	4	4	5	4	4	5	4	4	5	3	4	4	4	4	5	4	4	5	4	34.8	34.8
P62913	P62913	11	11	11	60S ribosomal protein L11	RPL11		1	11	11	11	9	8	8	9	9	10	10	9	9	9	10	10	9	8	8	9	9	10	10	9	9	9	10	10	9	8	8	9	9	10	10	9	9	9	10	10	55.6	55.6
P62917	P62917	16	16	16	60S ribosomal protein L8	RPL8		1	16	16	16	15	12	14	14	16	16	15	16	15	13	13	15	15	12	14	14	16	16	15	16	15	13	13	15	15	12	14	14	16	16	15	16	15	13	13	15	51	51
P62937;P0DN26;A0A0B4J2A2;A0A075B759;Q9Y536;F5H284;P0DN37	P62937	15;2;2;2;2;2;1	15;2;2;2;2;2;1	15;2;2;2;2;2;1	Peptidyl-prolyl cis-trans isomerase A;Peptidyl-prolyl cis-trans isomerase A, N-terminally processed	PPIA		7	15	15	15	15	15	13	15	15	15	15	15	14	15	15	14	15	15	13	15	15	15	15	15	14	15	15	14	15	15	13	15	15	15	15	15	14	15	15	14	82.4	82.4
P62942	P62942	2	2	2	Peptidyl-prolyl cis-trans isomerase FKBP1A	FKBP1A		1	2	2	2	2	1	2	2	2	2	1	2	2	2	2	2	2	1	2	2	2	2	1	2	2	2	2	2	2	1	2	2	2	2	1	2	2	2	2	2	2021-03-21	2021-03-21
P62979;P62987;P0CG47;P0CG48	P62979;P62987;P0CG47;P0CG48	8;6;6;6	8;6;6;6	8;6;6;6	Ubiquitin-40S ribosomal protein S27a;Ubiquitin;40S ribosomal protein S27a;Ubiquitin-60S ribosomal protein L40;Ubiquitin;60S ribosomal protein L40;Polyubiquitin-B;Ubiquitin;Polyubiquitin-C;Ubiquitin	RPS27A;UBA52;UBB;UBC	;;;	4	8	8	8	8	8	8	8	8	8	8	8	8	8	8	8	8	8	8	8	8	8	8	8	8	8	8	8	8	8	8	8	8	8	8	8	8	8	8	8	53.8	53.8
P62993	P62993	4	4	4	Growth factor receptor-bound protein 2	GRB2		1	4	4	4	3	3	4	3	4	4	4	4	3	4	3	4	3	3	4	3	4	4	4	4	3	4	3	4	3	3	4	3	4	4	4	4	3	4	3	4	2021-09-18	2021-09-18
P62995	P62995	6	6	6	Transformer-2 protein homolog beta	TRA2B		1	6	6	6	5	5	5	4	5	6	4	3	5	5	6	4	5	5	5	4	5	6	4	3	5	5	6	4	5	5	5	4	5	6	4	3	5	5	6	4	2021-03-25	2021-03-25
P63000;P60763	P63000;P60763	9;5	4;1	4;1	Ras-related C3 botulinum toxin substrate 1;Ras-related C3 botulinum toxin substrate 3	RAC1;RAC3	;	2	9	4	4	7	8	7	8	8	9	9	8	8	8	9	8	4	4	4	4	4	4	4	4	4	4	4	4	4	4	4	4	4	4	4	4	4	4	4	4	42.7	2021-08-19
P63010	P63010	13	7	7	AP-2 complex subunit beta	AP2B1		1	13	7	7	12	12	12	13	12	12	12	13	13	12	13	13	6	6	6	7	6	6	6	7	7	6	7	7	6	6	6	7	6	6	6	7	7	6	7	7	2021-01-16	2021-02-10
P63092;Q5JWF2	P63092;Q5JWF2	4;4	2;2	2;2	Guanine nucleotide-binding protein G(s) subunit alpha isoforms short;Guanine nucleotide-binding protein G(s) subunit alpha isoforms XLas	GNAS	;	2	4	2	2	1	4	3	4	2	3	2	3	2	3	2	3	0	2	2	2	1	1	1	1	1	2	1	1	0	2	2	2	1	1	1	1	1	2	1	1	2021-07-10	2021-06-06
P63104	P63104	28	28	20	14-3-3 protein zeta/delta	YWHAZ		1	28	28	20	24	23	23	24	26	27	24	25	26	23	24	22	24	23	23	24	26	27	24	25	26	23	24	22	17	18	18	18	19	19	18	19	18	18	19	16	86.9	86.9
P63151;Q66LE6;Q00005;Q9Y2T4	P63151	11;4;3;2	11;4;3;2	11;4;3;2	Serine/threonine-protein phosphatase 2A 55 kDa regulatory subunit B alpha isoform	PPP2R2A		4	11	11	11	9	9	6	8	10	7	10	10	9	10	7	8	9	9	6	8	10	7	10	10	9	10	7	8	9	9	6	8	10	7	10	10	9	10	7	8	34.2	34.2
P63165	P63165	1	1	1	Small ubiquitin-related modifier 1	SUMO1		1	1	1	1	1	1	1	1	1	1	1	1	1	1	1	1	1	1	1	1	1	1	1	1	1	1	1	1	1	1	1	1	1	1	1	1	1	1	1	1	2021-09-11	2021-09-11
P63167	P63167	3	3	2	Dynein light chain 1, cytoplasmic	DYNLL1		1	3	3	2	2	2	2	3	3	2	3	2	3	3	2	3	2	2	2	3	3	2	3	2	3	3	2	3	1	1	1	2	2	1	2	1	2	2	1	2	50.6	50.6
P63173	P63173	3	3	3	60S ribosomal protein L38	RPL38		1	3	3	3	2	2	2	3	2	2	2	3	2	2	2	2	2	2	2	3	2	2	2	3	2	2	2	2	2	2	2	3	2	2	2	3	2	2	2	2	35.7	35.7
P63208	P63208	5	5	5	S-phase kinase-associated protein 1	SKP1		1	5	5	5	1	3	2	4	3	2	2	3	2	4	5	4	1	3	2	4	3	2	2	3	2	4	5	4	1	3	2	4	3	2	2	3	2	4	5	4	2021-07-30	2021-07-30
P63218	P63218	2	2	2	Guanine nucleotide-binding protein G(I)/G(S)/G(O) subunit gamma-5	GNG5		1	2	2	2	1	1	2	1	1	2	1	1	1	1	1	1	1	1	2	1	1	2	1	1	1	1	1	1	1	1	2	1	1	2	1	1	1	1	1	1	2021-09-27	2021-09-27
P63220	P63220	7	7	7	40S ribosomal protein S21	RPS21		1	7	7	7	6	6	6	6	6	6	6	6	6	6	7	7	6	6	6	6	6	6	6	6	6	6	7	7	6	6	6	6	6	6	6	6	6	6	7	7	71.1	71.1
P63241;Q9GZV4;Q6IS14	P63241;Q9GZV4	5;3;2	5;3;2	5;3;2	Eukaryotic translation initiation factor 5A-1;Eukaryotic translation initiation factor 5A-2	EIF5A;EIF5A2	;	3	5	5	5	5	5	4	4	5	5	5	5	5	4	5	5	5	5	4	4	5	5	5	5	5	4	5	5	5	5	4	4	5	5	5	5	5	4	5	5	40.3	40.3
P63244	P63244	15	15	15	Guanine nucleotide-binding protein subunit beta-2-like 1;Guanine nucleotide-binding protein subunit beta-2-like 1, N-terminally processed	GNB2L1		1	15	15	15	12	15	13	12	14	13	10	15	13	14	15	14	12	15	13	12	14	13	10	15	13	14	15	14	12	15	13	12	14	13	10	15	13	14	15	14	59.3	59.3
P63261	P63261	51	1	1	Actin, cytoplasmic 2;Actin, cytoplasmic 2, N-terminally processed	ACTG1		1	51	1	1	49	48	47	47	49	48	49	50	49	51	49	48	1	0	1	0	1	1	1	0	1	1	1	1	1	0	1	0	1	1	1	0	1	1	1	1	99.2	2021-05-04
5;172086;172087;172088;172089;176542;176543;176544;176545;176546;176547;176548;176549;176550;176551;176552;176553;176554;176555;176556;176557;176558;176559;176560;176561;176562;176563;176564;176565;176566;176567;176568;176569;176570;176571;176572;176573;176574;176575;176576;176577;176578;176579;176580;176581;176582;176583;176584;176585;176586;176587;176588;176589;176590;176591;176592;176593;17659…	6256;15272;21118;21217;23608;23687;24426;27189;29258;29740;31218;31294;33853;36133;36279;36288;36581;36720;48074;65161;65268;65301;68900;68940;69045;74895;76687;76698;79023;79051;86112;87586;95241;98660;98738;99257;99527;124116;125152;136235;136252;140740;159457;171752;176703;176721;176734;199809;200661;200663;200666	258;259;260;261;262;263;265;266;267;268;269;270;271;295	16;44;47;119;123;132;153;190;227;269;283;305;313;325
P63313;CON__P21752	P63313;CON__P21752	6;3	5;2	5;2	Thymosin beta-10	TMSB10	;	2	6	5	5	6	6	6	6	6	6	6	6	6	5	6	6	5	5	5	5	5	5	5	5	5	5	5	5	5	5	5	5	5	5	5	5	5	5	5	5	81.8	81.8
P67775;P62714	P67775;P62714	9;8	9;8	9;8	Serine/threonine-protein phosphatase 2A catalytic subunit alpha isoform;Serine/threonine-protein phosphatase 2A catalytic subunit beta isoform	PPP2CA;PPP2CB	;	2	9	9	9	4	4	3	5	6	6	4	6	4	7	7	5	4	4	3	5	6	6	4	6	4	7	7	5	4	4	3	5	6	6	4	6	4	7	7	5	39.8	39.8
P67809;P16989;Q9Y2T7	P67809	13;3;1	13;3;1	13;3;1	Nuclease-sensitive element-binding protein 1	YBX1		3	13	13	13	11	12	11	12	12	12	11	12	10	12	13	12	11	12	11	12	12	12	11	12	10	12	13	12	11	12	11	12	12	12	11	12	10	12	13	12	54.9	54.9
P67812	P67812	4	4	4	Signal peptidase complex catalytic subunit SEC11A	SEC11A		1	4	4	4	3	3	2	4	4	3	3	3	3	4	4	2	3	3	2	4	4	3	3	3	3	4	4	2	3	3	2	4	4	3	3	3	3	4	4	2	2021-05-14	2021-05-14
P67936	P67936	31	31	20	Tropomyosin alpha-4 chain	TPM4		1	31	31	20	24	29	25	30	27	28	26	29	27	29	30	27	24	29	25	30	27	28	26	29	27	29	30	27	16	18	16	20	17	18	15	18	18	19	19	19	79	79
P68032;P68133;P63267;P62736	P68032;P68133;P63267;P62736	28;26;25;25	6;5;4;4	6;5;4;4	Actin, alpha cardiac muscle 1;Actin, alpha skeletal muscle;Actin, gamma-enteric smooth muscle;Actin, aortic smooth muscle	ACTC1;ACTA1;ACTG2;ACTA2	;;;	4	28	6	6	28	26	25	26	28	27	25	27	27	28	26	26	6	5	4	5	6	5	3	5	5	6	5	5	6	5	4	5	6	5	3	5	5	6	5	5	50.4	2021-09-14
P68036;A0A1B0GUS4	P68036	7;3	7;3	7;3	Ubiquitin-conjugating enzyme E2 L3	UBE2L3		2	7	7	7	4	5	5	6	7	6	6	6	6	6	6	6	4	5	5	6	7	6	6	6	6	6	6	6	4	5	5	6	7	6	6	6	6	6	6	6	70.1	70.1
P68104;Q5VTE0	P68104;Q5VTE0	29;28	29;28	15;14	Elongation factor 1-alpha 1;Putative elongation factor 1-alpha-like 3	EEF1A1;EEF1A1P5	;	2	29	29	15	24	23	23	23	26	26	23	25	26	24	26	25	24	23	23	23	26	26	23	25	26	24	26	25	11	11	11	10	12	12	10	12	12	11	14	12	68.8	68.8
P68366	P68366	18	3	2	Tubulin alpha-4A chain	TUBA4A		1	18	3	2	15	16	15	16	15	15	15	15	16	15	17	15	2	2	1	2	2	3	1	1	3	1	2	2	1	1	0	1	1	2	0	0	2	0	1	1	48.7	2021-05-08
P68371	P68371	32	32	2	Tubulin beta-4B chain	TUBB4B		1	32	32	2	27	29	25	30	30	29	29	31	31	30	30	30	27	29	25	30	30	29	29	31	31	30	30	30	2	2	2	2	2	2	2	2	2	2	2	2	69.2	69.2
Q8NEV1;P68400	Q8NEV1;P68400	1;1	1;1	1;1	Casein kinase II subunit alpha 3;Casein kinase II subunit alpha	CSNK2A3;CSNK2A1	;	2	1	1	1	1	1	1	1	1	1	1	1	1	1	1	1	1	1	1	1	1	1	1	1	1	1	1	1	1	1	1	1	1	1	1	1	1	1	1	1	2021-06-04	2021-06-04
P68402	P68402	4	4	4	Platelet-activating factor acetylhydrolase IB subunit beta	PAFAH1B2		1	4	4	4	3	3	3	4	3	4	2	3	4	3	3	4	3	3	3	4	3	4	2	3	4	3	3	4	3	3	3	4	3	4	2	3	4	3	3	4	39.7	39.7
P68431;Q16695;Q6NXT2	P68431;Q16695;Q6NXT2	13;10;8	1;0;0	1;0;0	Histone H3.1;Histone H3.1t;Histone H3.3C	HIST1H3A;HIST3H3;H3F3C	;;	3	13	1	1	11	13	13	12	12	12	12	12	12	12	13	13	1	1	1	1	1	1	1	1	1	1	1	1	1	1	1	1	1	1	1	1	1	1	1	1	64	2021-05-23
P78324;Q5TFQ8;O00241;Q9P1W8	P78324;Q5TFQ8	6;5;2;1	6;5;2;1	6;5;2;1	Tyrosine-protein phosphatase non-receptor type substrate 1;Signal-regulatory protein beta-1 isoform 3	SIRPA;SIRPB1	;	4	6	6	6	4	6	6	5	5	3	4	5	5	3	4	4	4	6	6	5	5	3	4	5	5	3	4	4	4	6	6	5	5	3	4	5	5	3	4	4	2021-05-16	2021-05-16
P78332	P78332	1	1	1	RNA-binding protein 6	RBM6		1	1	1	1	0	1	1	1	1	1	0	0	0	1	1	1	0	1	1	1	1	1	0	0	0	1	1	1	0	1	1	1	1	1	0	0	0	1	1	1	2021-04-01	2021-04-01
P78344	P78344	8	8	8	Eukaryotic translation initiation factor 4 gamma 2	EIF4G2		1	8	8	8	2	6	6	6	5	4	3	6	6	6	7	4	2	6	6	6	5	4	3	6	6	6	7	4	2	6	6	6	5	4	3	6	6	6	7	4	2021-07-12	2021-07-12
P78346	P78346	1	1	1	Ribonuclease P protein subunit p30	RPP30		1	1	1	1	1	1	0	1	1	1	0	1	1	1	1	1	1	1	0	1	1	1	0	1	1	1	1	1	1	1	0	1	1	1	0	1	1	1	1	1	2021-04-03	2021-04-03
P78347	P78347	8	8	8	General transcription factor II-I	GTF2I		1	8	8	8	4	5	5	6	3	4	5	5	3	5	5	4	4	5	5	6	3	4	5	5	3	5	5	4	4	5	5	6	3	4	5	5	3	5	5	4	11	11
P78371	P78371	33	33	33	T-complex protein 1 subunit beta	CCT2		1	33	33	33	31	30	28	30	29	29	31	29	30	32	32	28	31	30	28	30	29	29	31	29	30	32	32	28	31	30	28	30	29	29	31	29	30	32	32	28	70.5	70.5
P78417	P78417	12	12	12	Glutathione S-transferase omega-1	GSTO1		1	12	12	12	9	11	10	11	11	11	11	12	12	12	12	11	9	11	10	11	11	11	11	12	12	12	12	11	9	11	10	11	11	11	11	12	12	12	12	11	46.5	46.5
P78527	P78527	87	87	87	DNA-dependent protein kinase catalytic subunit	PRKDC		1	87	87	87	58	69	60	72	66	69	57	69	71	66	74	72	58	69	60	72	66	69	57	69	71	66	74	72	58	69	60	72	66	69	57	69	71	66	74	72	2021-01-25	2021-01-25
P78536	P78536	1	1	1	Disintegrin and metalloproteinase domain-containing protein 17	ADAM17		1	1	1	1	1	1	0	0	1	1	1	0	0	1	0	1	1	1	0	0	1	1	1	0	0	1	0	1	1	1	0	0	1	1	1	0	0	1	0	1	2021-02-01	2021-02-01
P78563	P78563	1	1	1	Double-stranded RNA-specific editase 1	ADARB1		1	1	1	1	1	1	1	1	1	1	1	1	1	0	1	1	1	1	1	1	1	1	1	1	1	0	1	1	1	1	1	1	1	1	1	1	1	0	1	1	2021-06-03	2021-06-03
P80217	P80217	5	5	5	Interferon-induced 35 kDa protein	IFI35		1	5	5	5	3	3	3	4	5	4	4	4	4	3	3	4	3	3	3	4	5	4	4	4	4	3	3	4	3	3	3	4	5	4	4	4	4	3	3	4	2021-09-26	2021-09-26
P80303	P80303	9	9	9	Nucleobindin-2;Nesfatin-1	NUCB2		1	9	9	9	8	8	9	8	8	9	7	8	9	9	8	9	8	8	9	8	8	9	7	8	9	9	8	9	8	8	9	8	8	9	7	8	9	9	8	9	25	25
P80723	P80723	10	10	10	Brain acid soluble protein 1	BASP1		1	10	10	10	5	6	9	6	10	10	6	10	10	8	8	7	5	6	9	6	10	10	6	10	10	8	8	7	5	6	9	6	10	10	6	10	10	8	8	7	64.3	64.3
P82650	P82650	3	3	3	28S ribosomal protein S22, mitochondrial	MRPS22		1	3	3	3	2	2	2	1	2	2	0	1	3	1	2	2	2	2	2	1	2	2	0	1	3	1	2	2	2	2	2	1	2	2	0	1	3	1	2	2	2021-09-11	2021-09-11
P82673	P82673	2	2	2	28S ribosomal protein S35, mitochondrial	MRPS35		1	2	2	2	2	2	2	2	2	1	2	2	2	2	2	2	2	2	2	2	2	1	2	2	2	2	2	2	2	2	2	2	2	1	2	2	2	2	2	2	2021-05-11	2021-05-11
P82675	P82675	1	1	1	28S ribosomal protein S5, mitochondrial	MRPS5		1	1	1	1	1	1	1	1	1	1	0	1	1	1	1	1	1	1	1	1	1	1	0	1	1	1	1	1	1	1	1	1	1	1	0	1	1	1	1	1	2021-01-05	2021-01-05
P82909	P82909	2	2	2	28S ribosomal protein S36, mitochondrial	MRPS36		1	2	2	2	2	1	1	2	1	2	1	2	1	1	1	2	2	1	1	2	1	2	1	2	1	1	1	2	2	1	1	2	1	2	1	2	1	1	1	2	2021-02-27	2021-02-27
P82932	P82932	1	1	1	28S ribosomal protein S6, mitochondrial	MRPS6		1	1	1	1	0	1	1	1	1	1	0	1	1	1	1	1	0	1	1	1	1	1	0	1	1	1	1	1	0	1	1	1	1	1	0	1	1	1	1	1	8	8
P82933	P82933	1	1	1	28S ribosomal protein S9, mitochondrial	MRPS9		1	1	1	1	1	1	1	1	1	1	1	1	1	1	1	1	1	1	1	1	1	1	1	1	1	1	1	1	1	1	1	1	1	1	1	1	1	1	1	1	2021-03-03	2021-03-03
P82979	P82979	8	8	8	SAP domain-containing ribonucleoprotein	SARNP		1	8	8	8	8	8	8	8	8	8	7	7	7	7	7	8	8	8	8	8	8	8	7	7	7	7	7	8	8	8	8	8	8	8	7	7	7	7	7	8	39	39
P83111	P83111	5	5	5	Serine beta-lactamase-like protein LACTB, mitochondrial	LACTB		1	5	5	5	5	4	3	3	5	5	5	4	4	4	3	3	5	4	3	3	5	5	5	4	4	4	3	3	5	4	3	3	5	5	5	4	4	4	3	3	2021-01-12	2021-01-12
P83731	P83731	7	7	7	60S ribosomal protein L24	RPL24		1	7	7	7	7	7	7	7	7	7	7	7	7	7	7	7	7	7	7	7	7	7	7	7	7	7	7	7	7	7	7	7	7	7	7	7	7	7	7	7	35	35
P83881	P83881	5	5	1	60S ribosomal protein L36a	RPL36A		1	5	5	1	3	4	3	3	3	2	1	3	3	4	2	2	3	4	3	3	3	2	1	3	3	4	2	2	1	1	0	1	1	0	0	0	0	1	0	0	40.6	40.6
P84085	P84085	6	2	2	ADP-ribosylation factor 5	ARF5		1	6	2	2	4	3	2	6	5	5	4	6	6	6	5	3	1	1	1	2	2	2	1	2	2	2	1	1	1	1	1	2	2	2	1	2	2	2	1	1	45.6	2021-06-15
P84090	P84090	3	3	3	Enhancer of rudimentary homolog	ERH		1	3	3	3	2	3	3	3	3	2	2	2	3	2	2	2	2	3	3	3	3	2	2	2	3	2	2	2	2	3	3	3	3	2	2	2	3	2	2	2	2021-07-31	2021-07-31
P84095	P84095	8	7	7	Rho-related GTP-binding protein RhoG	RHOG		1	8	7	7	5	7	7	6	4	6	5	7	5	6	6	6	5	6	6	5	4	5	4	6	4	5	5	5	5	6	6	5	4	5	4	6	4	5	5	5	51.3	45.5
P84098	P84098	6	6	6	60S ribosomal protein L19	RPL19		1	6	6	6	5	5	6	5	5	6	5	5	5	6	6	5	5	5	6	5	5	6	5	5	5	6	6	5	5	5	6	5	5	6	5	5	5	6	6	5	2021-04-20	2021-04-20
P84103	P84103	4	4	4	Serine/arginine-rich splicing factor 3	SRSF3		1	4	4	4	4	4	4	4	4	4	4	4	4	4	4	4	4	4	4	4	4	4	4	4	4	4	4	4	4	4	4	4	4	4	4	4	4	4	4	4	2021-02-26	2021-02-26
P84243	P84243	13	1	1	Histone H3.3	H3F3A		1	13	1	1	11	13	13	12	12	12	12	12	12	12	13	13	1	1	1	1	1	1	1	1	1	1	1	1	1	1	1	1	1	1	1	1	1	1	1	1	64	2021-05-23
P98082	P98082	5	5	5	Disabled homolog 2	DAB2		1	5	5	5	3	5	3	5	4	4	3	5	4	4	5	4	3	5	3	5	4	4	3	5	4	4	5	4	3	5	3	5	4	4	3	5	4	4	5	4	2021-08-13	2021-08-13
P98171	P98171	12	12	12	Rho GTPase-activating protein 4	ARHGAP4		1	12	12	12	6	7	8	10	8	9	9	10	10	11	8	7	6	7	8	10	8	9	9	10	10	11	8	7	6	7	8	10	8	9	9	10	10	11	8	7	2021-09-20	2021-09-20
P98175	P98175	3	3	3	RNA-binding protein 10	RBM10		1	3	3	3	3	3	1	3	3	3	1	3	3	3	3	3	3	3	1	3	3	3	1	3	3	3	3	3	3	3	1	3	3	3	1	3	3	3	3	3	2021-06-08	2021-06-08
P98179	P98179	3	3	3	RNA-binding protein 3	RBM3		1	3	3	3	3	3	3	3	3	3	2	3	3	3	3	3	3	3	3	3	3	3	2	3	3	3	3	3	3	3	3	3	3	3	2	3	3	3	3	3	2021-07-28	2021-07-28
P98196	P98196	1	1	1	Probable phospholipid-transporting ATPase IH	ATP11A		1	1	1	1	1	1	1	1	1	1	1	1	1	1	0	1	1	1	1	1	1	1	1	1	1	1	0	1	1	1	1	1	1	1	1	1	1	1	0	1	2	2
P99999	P99999	5	5	5	Cytochrome c	CYCS		1	5	5	5	4	5	5	5	5	5	4	5	5	4	5	5	4	5	5	5	5	5	4	5	5	4	5	5	4	5	5	5	5	5	4	5	5	4	5	5	39	39
Q00013	Q00013	5	5	5	55 kDa erythrocyte membrane protein	MPP1		1	5	5	5	4	3	3	3	4	4	3	4	4	4	4	3	4	3	3	3	4	4	3	4	4	4	4	3	4	3	3	3	4	4	3	4	4	4	4	3	2021-06-14	2021-06-14
Q00059	Q00059	4	4	4	Transcription factor A, mitochondrial	TFAM		1	4	4	4	3	4	2	4	3	3	2	3	3	4	3	3	3	4	2	4	3	3	2	3	3	4	3	3	3	4	2	4	3	3	2	3	3	4	3	3	2021-09-17	2021-09-17
Q00325	Q00325	8	8	8	Phosphate carrier protein, mitochondrial	SLC25A3		1	8	8	8	7	8	8	8	8	8	8	8	8	8	8	6	7	8	8	8	8	8	8	8	8	8	8	6	7	8	8	8	8	8	8	8	8	8	8	6	2021-01-19	2021-01-19
Q00341	Q00341	20	20	20	Vigilin	HDLBP		1	20	20	20	13	16	15	16	15	15	14	17	18	18	16	12	13	16	15	16	15	15	14	17	18	18	16	12	13	16	15	16	15	15	14	17	18	18	16	12	2021-06-20	2021-06-20
Q00403	Q00403	1	1	1	Transcription initiation factor IIB	GTF2B		1	1	1	1	1	1	0	1	1	1	0	1	1	1	1	1	1	1	0	1	1	1	0	1	1	1	1	1	1	1	0	1	1	1	0	1	1	1	1	1	2021-06-06	2021-06-06
Q00534	Q00534	6	6	5	Cyclin-dependent kinase 6	CDK6		1	6	6	5	4	5	5	5	5	5	4	5	5	6	6	6	4	5	5	5	5	5	4	5	5	6	6	6	3	4	4	4	4	4	3	4	4	5	5	5	2021-05-28	2021-05-28
Q00535	Q00535	5	4	4	Cyclin-dependent-like kinase 5	CDK5		1	5	4	4	3	5	5	4	4	4	4	4	4	4	4	5	2	4	4	3	3	3	3	3	3	3	3	4	2	4	4	3	3	3	3	3	3	3	3	4	2021-02-19	2021-04-16
Q00577	Q00577	6	6	5	Transcriptional activator protein Pur-alpha	PURA		1	6	6	5	5	5	4	4	5	5	5	5	5	5	6	5	5	5	4	4	5	5	5	5	5	5	6	5	4	4	3	4	4	4	4	4	4	4	5	4	2021-08-25	2021-08-25
Q00610;P53675	Q00610	79;19	79;19	79;19	Clathrin heavy chain 1	CLTC		2	79	79	79	68	71	61	67	68	73	66	73	70	68	74	65	68	71	61	67	68	73	66	73	70	68	74	65	68	71	61	67	68	73	66	73	70	68	74	65	51.7	51.7
Q00653	Q00653	3	3	3	Nuclear factor NF-kappa-B p100 subunit;Nuclear factor NF-kappa-B p52 subunit	NFKB2		1	3	3	3	2	1	1	2	3	3	2	2	2	1	1	1	2	1	1	2	3	3	2	2	2	1	1	1	2	1	1	2	3	3	2	2	2	1	1	1	2021-01-08	2021-01-08
Q00688	Q00688	3	3	3	Peptidyl-prolyl cis-trans isomerase FKBP3	FKBP3		1	3	3	3	0	1	1	3	0	0	1	2	3	1	3	0	0	1	1	3	0	0	1	2	3	1	3	0	0	1	1	3	0	0	1	2	3	1	3	0	2021-09-17	2021-09-17
Q00722	Q00722	8	8	8	1-phosphatidylinositol 4,5-bisphosphate phosphodiesterase beta-2	PLCB2		1	8	8	8	6	6	6	8	8	7	7	7	8	7	7	6	6	6	6	8	8	7	7	7	8	7	7	6	6	6	6	8	8	7	7	7	8	7	7	6	2021-04-10	2021-04-10
Q00765	Q00765	2	2	2	Receptor expression-enhancing protein 5	REEP5		1	2	2	2	2	2	2	2	2	2	2	2	2	2	2	2	2	2	2	2	2	2	2	2	2	2	2	2	2	2	2	2	2	2	2	2	2	2	2	2	2021-03-06	2021-03-06
Q00796	Q00796	7	7	7	Sorbitol dehydrogenase	SORD		1	7	7	7	4	5	4	2	4	3	3	3	3	4	4	3	4	5	4	2	4	3	3	3	3	4	4	3	4	5	4	2	4	3	3	3	3	4	4	3	2021-09-28	2021-09-28
Q00839	Q00839	45	45	45	Heterogeneous nuclear ribonucleoprotein U	HNRNPU		1	45	45	45	33	38	38	40	35	38	34	38	36	41	40	35	33	38	38	40	35	38	34	38	36	41	40	35	33	38	38	40	35	38	34	38	36	41	40	35	47.9	47.9
Q01082	Q01082	8	8	8	Spectrin beta chain, non-erythrocytic 1	SPTBN1		1	8	8	8	5	7	5	8	5	5	4	6	6	6	7	7	5	7	5	8	5	5	4	6	6	6	7	7	5	7	5	8	5	5	4	6	6	6	7	7	2021-08-03	2021-08-03
Q01085	Q01085	3	3	3	Nucleolysin TIAR	TIAL1		1	3	3	3	2	1	2	1	1	2	0	2	2	2	2	2	2	1	2	1	1	2	0	2	2	2	2	2	2	1	2	1	1	2	0	2	2	2	2	2	2021-09-13	2021-09-13
Q01105;P0DME0	Q01105;P0DME0	9;5	9;5	9;5	Protein SET;Protein SETSIP	SET;SETSIP	;	2	9	9	9	5	9	7	8	6	6	8	9	7	8	8	7	5	9	7	8	6	6	8	9	7	8	8	7	5	9	7	8	6	6	8	9	7	8	8	7	40.7	40.7
Q01130;Q9BRL6	Q01130;Q9BRL6	3;2	3;2	3;2	Serine/arginine-rich splicing factor 2;Serine/arginine-rich splicing factor 8	SRSF2;SRSF8	;	2	3	3	3	3	3	3	2	2	3	2	2	2	3	2	3	3	3	3	2	2	3	2	2	2	3	2	3	3	3	3	2	2	3	2	2	2	3	2	3	14	14
Q01432	Q01432	8	8	8	AMP deaminase 3	AMPD3		1	8	8	8	6	0	2	2	6	7	5	5	8	0	0	1	6	0	2	2	6	7	5	5	8	0	0	1	6	0	2	2	6	7	5	5	8	0	0	1	2021-05-14	2021-05-14
Q01469;A8MUU1	Q01469	17;4	17;4	17;4	Fatty acid-binding protein, epidermal	FABP5		2	17	17	17	15	15	14	16	14	14	14	15	14	17	17	14	15	15	14	16	14	14	14	15	14	17	17	14	15	15	14	16	14	14	14	15	14	17	17	14	79.3	79.3
Q01518;P40123	Q01518	67;1	67;1	67;1	Adenylyl cyclase-associated protein 1	CAP1		2	67	67	67	65	64	64	66	65	66	64	67	65	66	65	65	65	64	64	66	65	66	64	67	65	66	65	65	65	64	64	66	65	66	64	67	65	66	65	65	85.7	85.7
Q01650	Q01650	2	2	2	Large neutral amino acids transporter small subunit 1	SLC7A5		1	2	2	2	2	2	2	2	2	2	2	2	2	2	2	2	2	2	2	2	2	2	2	2	2	2	2	2	2	2	2	2	2	2	2	2	2	2	2	2	2021-03-06	2021-03-06
Q01658	Q01658	3	3	3	Protein Dr1	DR1		1	3	3	3	2	2	2	1	1	2	0	2	2	1	2	1	2	2	2	1	1	2	0	2	2	1	2	1	2	2	2	1	1	2	0	2	2	1	2	1	2021-09-19	2021-09-19
Q01780	Q01780	3	3	3	Exosome component 10	EXOSC10		1	3	3	3	2	3	3	3	3	3	1	3	3	3	3	3	2	3	3	3	3	3	1	3	3	3	3	3	2	3	3	3	3	3	1	3	3	3	3	3	2021-09-06	2021-09-06
Q01813	Q01813	25	25	23	ATP-dependent 6-phosphofructokinase, platelet type	PFKP		1	25	25	23	18	23	22	24	22	21	18	21	23	22	25	24	18	23	22	24	22	21	18	21	23	22	25	24	18	21	20	22	21	19	18	19	21	20	23	22	32.5	32.5
Q01826	Q01826	2	2	2	DNA-binding protein SATB1	SATB1		1	2	2	2	1	2	2	2	1	2	0	2	2	1	2	1	1	2	2	2	1	2	0	2	2	1	2	1	1	2	2	2	1	2	0	2	2	1	2	1	2021-09-05	2021-09-05
Q01844	Q01844	3	3	3	RNA-binding protein EWS	EWSR1		1	3	3	3	1	3	3	2	3	3	0	3	2	3	3	3	1	3	3	2	3	3	0	3	2	3	3	3	1	3	3	2	3	3	0	3	2	3	3	3	2021-01-08	2021-01-08
Q01970	Q01970	4	4	4	1-phosphatidylinositol 4,5-bisphosphate phosphodiesterase beta-3	PLCB3		1	4	4	4	1	4	2	4	2	3	3	4	4	3	4	3	1	4	2	4	2	3	3	4	4	3	4	3	1	4	2	4	2	3	3	4	4	3	4	3	2021-06-05	2021-06-05
Q02040	Q02040	1	1	1	A-kinase anchor protein 17A	AKAP17A		1	1	1	1	1	1	0	1	1	0	1	1	1	1	1	1	1	1	0	1	1	0	1	1	1	1	1	1	1	1	0	1	1	0	1	1	1	1	1	1	4	4
Q02218	Q02218	10	10	8	2-oxoglutarate dehydrogenase, mitochondrial	OGDH		1	10	10	8	8	10	7	10	9	9	8	10	10	9	10	9	8	10	7	10	9	9	8	10	10	9	10	9	7	8	6	8	7	8	7	8	8	8	8	8	2021-08-15	2021-08-15
Q02543	Q02543	8	8	8	60S ribosomal protein L18a	RPL18A		1	8	8	8	8	7	8	6	8	7	7	8	8	8	7	8	8	7	8	6	8	7	7	8	8	8	7	8	8	7	8	6	8	7	7	8	8	8	7	8	33.5	33.5
Q02750	Q02750	6	6	3	Dual specificity mitogen-activated protein kinase kinase 1	MAP2K1		1	6	6	3	6	4	3	6	5	6	6	5	6	4	5	4	6	4	3	6	5	6	6	5	6	4	5	4	3	2	1	3	3	3	3	3	3	2	2	2	2021-02-14	2021-02-14
Q02790	Q02790	4	4	4	Peptidyl-prolyl cis-trans isomerase FKBP4;Peptidyl-prolyl cis-trans isomerase FKBP4, N-terminally processed	FKBP4		1	4	4	4	2	2	2	2	2	3	4	3	2	3	3	4	2	2	2	2	2	3	4	3	2	3	3	4	2	2	2	2	2	3	4	3	2	3	3	4	2021-03-11	2021-03-11
Q02809	Q02809	11	11	11	Procollagen-lysine,2-oxoglutarate 5-dioxygenase 1	PLOD1		1	11	11	11	8	8	9	9	6	7	5	6	7	9	8	8	8	8	9	9	6	7	5	6	7	9	8	8	8	8	9	9	6	7	5	6	7	9	8	8	2021-01-20	2021-01-20
Q02818	Q02818	20	20	20	Nucleobindin-1	NUCB1		1	20	20	20	17	16	16	16	18	16	17	17	17	15	16	14	17	16	16	16	18	16	17	17	17	15	16	14	17	16	16	16	18	16	17	17	17	15	16	14	47.9	47.9
Q02878	Q02878	12	12	12	60S ribosomal protein L6	RPL6		1	12	12	12	10	10	11	11	10	11	11	12	10	10	11	10	10	10	11	11	10	11	11	12	10	10	11	10	10	10	11	11	10	11	11	12	10	10	11	10	43.1	43.1
Q02880;P11388	Q02880	6;2	6;2	6;2	DNA topoisomerase 2-beta	TOP2B		2	6	6	6	3	4	3	5	2	6	4	5	3	5	5	2	3	4	3	5	2	6	4	5	3	5	5	2	3	4	3	5	2	6	4	5	3	5	5	2	2021-08-04	2021-08-04
Q02978	Q02978	3	3	3	Mitochondrial 2-oxoglutarate/malate carrier protein	SLC25A11		1	3	3	3	2	2	3	1	2	2	3	3	3	2	3	2	2	2	3	1	2	2	3	3	3	2	3	2	2	2	3	1	2	2	3	3	3	2	3	2	2021-08-11	2021-08-11
Q03154	Q03154	3	3	3	Aminoacylase-1	ACY1		1	3	3	3	2	3	2	2	2	2	1	2	2	1	2	2	2	3	2	2	2	2	1	2	2	1	2	2	2	3	2	2	2	2	1	2	2	1	2	2	2021-06-08	2021-06-08
Q03169	Q03169	2	2	2	Tumor necrosis factor alpha-induced protein 2	TNFAIP2		1	2	2	2	2	1	0	1	1	2	2	2	2	1	2	1	2	1	0	1	1	2	2	2	2	1	2	1	2	1	0	1	1	2	2	2	2	1	2	1	2021-04-05	2021-04-05
Q03252	Q03252	22	15	15	Lamin-B2	LMNB2		1	22	15	15	18	19	19	20	19	20	19	20	18	19	20	20	13	14	13	14	13	15	13	14	13	13	14	13	13	14	13	14	13	15	13	14	13	13	14	13	2021-08-31	2021-08-26
Q03405	Q03405	6	6	6	Urokinase plasminogen activator surface receptor	PLAUR		1	6	6	6	5	3	5	5	5	5	4	6	4	4	5	4	5	3	5	5	5	5	4	6	4	4	5	4	5	3	5	5	5	5	4	6	4	4	5	4	2021-08-27	2021-08-27
Q03518	Q03518	7	7	7	Antigen peptide transporter 1	TAP1		1	7	7	7	6	6	6	6	6	5	5	6	5	6	5	6	6	6	6	6	6	5	5	6	5	6	5	6	6	6	6	6	6	5	5	6	5	6	5	6	2021-05-17	2021-05-17
Q03519;Q9NUT2	Q03519	4;1	4;1	3;0	Antigen peptide transporter 2	TAP2		2	4	4	3	3	4	3	3	2	4	4	4	3	2	3	4	3	4	3	3	2	4	4	4	3	2	3	4	2	3	3	3	2	3	3	3	3	2	3	3	7	7
Q04323	Q04323	2	2	2	UBX domain-containing protein 1	UBXN1		1	2	2	2	2	2	0	2	2	2	2	2	2	2	2	2	2	2	0	2	2	2	2	2	2	2	2	2	2	2	0	2	2	2	2	2	2	2	2	2	2021-08-17	2021-08-17
Q04446	Q04446	8	8	8	1,4-alpha-glucan-branching enzyme	GBE1		1	8	8	8	7	7	5	8	5	5	6	6	7	8	6	6	7	7	5	8	5	5	6	6	7	8	6	6	7	7	5	8	5	5	6	6	7	8	6	6	2021-02-15	2021-02-15
Q04637;O43432	Q04637	17;2	17;2	17;2	Eukaryotic translation initiation factor 4 gamma 1	EIF4G1		2	17	17	17	16	16	14	15	17	16	15	17	16	17	17	15	16	16	14	15	17	16	15	17	16	17	17	15	16	16	14	15	17	16	15	17	16	17	17	15	2021-09-15	2021-09-15
Q04760	Q04760	12	12	12	Lactoylglutathione lyase	GLO1		1	12	12	12	11	12	11	12	8	9	12	11	11	10	12	9	11	12	11	12	8	9	12	11	11	10	12	9	11	12	11	12	8	9	12	11	11	10	12	9	66.3	66.3
Q04837	Q04837	4	4	4	Single-stranded DNA-binding protein, mitochondrial	SSBP1		1	4	4	4	2	3	4	4	3	2	4	4	4	4	4	2	2	3	4	4	3	2	4	4	4	4	4	2	2	3	4	4	3	2	4	4	4	4	4	2	37.8	37.8
Q04917	Q04917	13	8	8	14-3-3 protein eta	YWHAH		1	13	8	8	11	11	11	11	12	12	10	11	12	11	12	10	6	7	7	7	7	7	6	8	7	8	8	6	6	7	7	7	7	7	6	8	7	8	8	6	46.3	36.6
Q04941	Q04941	2	2	2	Proteolipid protein 2	PLP2		1	2	2	2	1	2	2	2	2	1	2	2	2	2	2	2	1	2	2	2	2	1	2	2	2	2	2	2	1	2	2	2	2	1	2	2	2	2	2	2	2021-04-18	2021-04-18
Q05048	Q05048	5	5	5	Cleavage stimulation factor subunit 1	CSTF1		1	5	5	5	3	5	4	5	3	4	4	3	5	4	4	5	3	5	4	5	3	4	4	3	5	4	4	5	3	5	4	5	3	4	4	3	5	4	4	5	2021-06-20	2021-06-20
Q05193	Q05193	8	2	1	Dynamin-1	DNM1		1	8	2	1	4	6	6	5	5	7	5	4	5	7	7	4	1	1	1	1	0	2	1	0	1	2	2	1	0	0	1	1	0	1	1	0	1	1	1	1	10	2021-05-03
Q05209	Q05209	8	8	8	Tyrosine-protein phosphatase non-receptor type 12	PTPN12		1	8	8	8	3	1	2	4	5	3	4	4	6	2	4	5	3	1	2	4	5	3	4	4	6	2	4	5	3	1	2	4	5	3	4	4	6	2	4	5	2021-04-11	2021-04-11
Q05519	Q05519	3	3	3	Serine/arginine-rich splicing factor 11	SRSF11		1	3	3	3	3	3	3	3	3	3	3	3	3	3	3	3	3	3	3	3	3	3	3	3	3	3	3	3	3	3	3	3	3	3	3	3	3	3	3	3	2021-01-08	2021-01-08
Q05639	Q05639	15	1	1	Elongation factor 1-alpha 2	EEF1A2		1	15	1	1	14	13	13	14	15	15	14	14	15	14	13	14	1	1	1	1	1	1	1	1	1	1	1	1	1	1	1	1	1	1	1	1	1	1	1	1	2021-07-31	2021-02-05
Q05655	Q05655	2	2	2	Protein kinase C delta type;Protein kinase C delta type regulatory subunit;Protein kinase C delta type catalytic subunit	PRKCD		1	2	2	2	1	1	1	2	2	1	0	1	1	1	1	1	1	1	1	2	2	1	0	1	1	1	1	1	1	1	1	2	2	1	0	1	1	1	1	1	2021-07-03	2021-07-03
Q05823	Q05823	2	2	2	2-5A-dependent ribonuclease	RNASEL		1	2	2	2	2	1	2	2	2	2	2	2	2	2	1	2	2	1	2	2	2	2	2	2	2	2	1	2	2	1	2	2	2	2	2	2	2	2	1	2	2021-03-02	2021-03-02
Q06124	Q06124	5	5	5	Tyrosine-protein phosphatase non-receptor type 11	PTPN11		1	5	5	5	2	1	4	3	4	4	3	4	4	3	3	4	2	1	4	3	4	4	3	4	4	3	3	4	2	1	4	3	4	4	3	4	4	3	3	4	2021-02-11	2021-02-11
Q06187	Q06187	4	4	4	Tyrosine-protein kinase BTK	BTK		1	4	4	4	4	4	2	4	4	4	4	4	4	4	4	4	4	4	2	4	4	4	4	4	4	4	4	4	4	4	2	4	4	4	4	4	4	4	4	4	2021-08-05	2021-08-05
Q06210;O94808	Q06210	5;2	5;2	5;2	Glutamine--fructose-6-phosphate aminotransferase [isomerizing] 1	GFPT1		2	5	5	5	5	5	5	5	5	5	4	4	4	5	5	3	5	5	5	5	5	5	4	4	4	5	5	3	5	5	5	5	5	5	4	4	4	5	5	3	2021-06-10	2021-06-10
Q06323	Q06323	9	9	9	Proteasome activator complex subunit 1	PSME1		1	9	9	9	8	7	8	8	8	8	9	9	8	7	9	8	8	7	8	8	8	8	9	9	8	7	9	8	8	7	8	8	8	8	9	9	8	7	9	8	2021-03-31	2021-03-31
Q06546	Q06546	1	1	1	GA-binding protein alpha chain	GABPA		1	1	1	1	1	1	0	0	0	1	0	1	0	1	1	0	1	1	0	0	0	1	0	1	0	1	1	0	1	1	0	0	0	1	0	1	0	1	1	0	2021-07-05	2021-07-05
Q06587;Q99496	Q06587	6;1	6;1	6;1	E3 ubiquitin-protein ligase RING1	RING1		2	6	6	6	4	5	5	5	3	4	3	6	4	5	5	4	4	5	5	5	3	4	3	6	4	5	5	4	4	5	5	5	3	4	3	6	4	5	5	4	2021-09-20	2021-09-20
Q06787	Q06787	1	1	1	Fragile X mental retardation protein 1	FMR1		1	1	1	1	1	1	0	1	0	1	0	1	1	1	1	1	1	1	0	1	0	1	0	1	1	1	1	1	1	1	0	1	0	1	0	1	1	1	1	1	2021-02-02	2021-02-02
Q06830	Q06830	24	24	20	Peroxiredoxin-1	PRDX1		1	24	24	20	20	21	21	22	23	22	21	23	22	22	21	21	20	21	21	22	23	22	21	23	22	22	21	21	16	17	17	19	19	18	17	19	18	18	18	18	95.5	95.5
Q07020	Q07020	8	8	8	60S ribosomal protein L18	RPL18		1	8	8	8	8	8	7	8	8	8	7	8	7	8	8	7	8	8	7	8	8	8	7	8	7	8	8	7	8	8	7	8	8	8	7	8	7	8	8	7	38.3	38.3
Q07021	Q07021	4	4	4	Complement component 1 Q subcomponent-binding protein, mitochondrial	C1QBP		1	4	4	4	3	3	4	4	4	4	3	4	3	4	4	3	3	3	4	4	4	4	3	4	3	4	4	3	3	3	4	4	4	4	3	4	3	4	4	3	2021-04-28	2021-04-28
Q07065	Q07065	6	6	6	Cytoskeleton-associated protein 4	CKAP4		1	6	6	6	4	4	6	6	4	4	3	5	4	4	4	5	4	4	6	6	4	4	3	5	4	4	4	5	4	4	6	6	4	4	3	5	4	4	4	5	2021-09-15	2021-09-15
Q07617	Q07617	1	1	1	Sperm-associated antigen 1	SPAG1		1	1	1	1	0	1	1	1	0	0	0	1	0	0	1	1	0	1	1	1	0	0	0	1	0	0	1	1	0	1	1	1	0	0	0	1	0	0	1	1	2021-01-02	2021-01-02
Q07666	Q07666	3	3	3	KH domain-containing, RNA-binding, signal transduction-associated protein 1	KHDRBS1		1	3	3	3	2	2	2	3	3	2	2	3	3	2	3	3	2	2	2	3	3	2	2	3	3	2	3	3	2	2	2	3	3	2	2	3	3	2	3	3	2021-07-09	2021-07-09
Q07812	Q07812	6	6	6	Apoptosis regulator BAX	BAX		1	6	6	6	3	4	5	5	6	4	3	5	5	5	5	4	3	4	5	5	6	4	3	5	5	5	5	4	3	4	5	5	6	4	3	5	5	5	5	4	36.5	36.5
Q07866;Q9H0B6;Q9NSK0	Q07866;Q9H0B6	4;3;1	4;3;1	4;3;1	Kinesin light chain 1;Kinesin light chain 2	KLC1;KLC2	;	3	4	4	4	4	3	3	4	3	2	2	3	3	2	3	4	4	3	3	4	3	2	2	3	3	2	3	4	4	3	3	4	3	2	2	3	3	2	3	4	2021-02-07	2021-02-07
Q07954	Q07954	4	4	4	Prolow-density lipoprotein receptor-related protein 1;Low-density lipoprotein receptor-related protein 1 85 kDa subunit;Low-density lipoprotein receptor-related protein 1 515 kDa subunit;Low-density lipoprotein receptor-related protein 1 intracellular domain	LRP1		1	4	4	4	3	2	3	3	3	4	3	4	4	2	2	2	3	2	3	3	3	4	3	4	4	2	2	2	3	2	3	3	3	4	3	4	4	2	2	2	2021-02-01	2021-02-01
Q07955	Q07955	10	10	10	Serine/arginine-rich splicing factor 1	SRSF1		1	10	10	10	9	9	9	10	10	10	9	10	9	10	10	10	9	9	9	10	10	10	9	10	9	10	10	10	9	9	9	10	10	10	9	10	9	10	10	10	46	46
Q07960	Q07960	8	8	8	Rho GTPase-activating protein 1	ARHGAP1		1	8	8	8	7	8	6	7	6	7	7	6	6	8	7	6	7	8	6	7	6	7	7	6	6	8	7	6	7	8	6	7	6	7	7	6	6	8	7	6	2021-05-23	2021-05-23
Q08209;P16298	Q08209;P16298	7;4	7;4	7;4	Serine/threonine-protein phosphatase 2B catalytic subunit alpha isoform;Serine/threonine-protein phosphatase 2B catalytic subunit beta isoform	PPP3CA;PPP3CB	;	2	7	7	7	6	6	5	5	5	6	4	5	6	6	6	5	6	6	5	5	5	6	4	5	6	6	6	5	6	6	5	5	5	6	4	5	6	6	6	5	2021-07-17	2021-07-17
Q08211	Q08211	34	34	34	ATP-dependent RNA helicase A	DHX9		1	34	34	34	30	31	28	31	30	30	27	30	28	29	31	30	30	31	28	31	30	30	27	30	28	29	31	30	30	31	28	31	30	30	27	30	28	29	31	30	32.9	32.9
Q08257	Q08257	1	1	1	Quinone oxidoreductase	CRYZ		1	1	1	1	0	1	1	1	1	1	1	1	1	1	1	1	0	1	1	1	1	1	1	1	1	1	1	1	0	1	1	1	1	1	1	1	1	1	1	1	2021-02-08	2021-02-08
Q08378	Q08378	9	9	9	Golgin subfamily A member 3	GOLGA3		1	9	9	9	4	5	7	7	6	8	4	6	6	6	6	6	4	5	7	7	6	8	4	6	6	6	6	6	4	5	7	7	6	8	4	6	6	6	6	6	2021-04-08	2021-04-08
Q08379	Q08379	5	5	5	Golgin subfamily A member 2	GOLGA2		1	5	5	5	4	3	5	5	4	4	4	4	5	4	3	4	4	3	5	5	4	4	4	4	5	4	3	4	4	3	5	5	4	4	4	4	5	4	3	4	2021-03-06	2021-03-06
Q08380	Q08380	2	2	2	Galectin-3-binding protein	LGALS3BP		1	2	2	2	1	1	1	1	1	1	2	2	1	1	1	1	1	1	1	1	1	1	2	2	1	1	1	1	1	1	1	1	1	1	2	2	1	1	1	1	5	5
Q08752	Q08752	6	6	6	Peptidyl-prolyl cis-trans isomerase D	PPID		1	6	6	6	3	4	4	5	5	4	3	5	5	6	5	5	3	4	4	5	5	4	3	5	5	6	5	5	3	4	4	5	5	4	3	5	5	6	5	5	2021-07-22	2021-07-22
Q08945	Q08945	8	8	8	FACT complex subunit SSRP1	SSRP1		1	8	8	8	4	6	7	8	6	7	6	6	4	8	7	8	4	6	7	8	6	7	6	6	4	8	7	8	4	6	7	8	6	7	6	6	4	8	7	8	2021-04-16	2021-04-16
Q08AM6	Q08AM6	2	2	2	Protein VAC14 homolog	VAC14		1	2	2	2	1	1	2	2	1	2	1	1	1	2	1	1	1	1	2	2	1	2	1	1	1	2	1	1	1	1	2	2	1	2	1	1	1	2	1	1	2021-07-04	2021-07-04
Q08J23	Q08J23	17	17	17	tRNA (cytosine(34)-C(5))-methyltransferase	NSUN2		1	17	17	17	10	11	8	13	11	10	9	11	11	10	12	12	10	11	8	13	11	10	9	11	11	10	12	12	10	11	8	13	11	10	9	11	11	10	12	12	2021-07-31	2021-07-31
Q09028	Q09028	12	7	7	Histone-binding protein RBBP4	RBBP4		1	12	7	7	9	9	7	10	10	10	8	10	9	11	11	10	6	6	3	6	6	6	4	6	5	7	6	6	6	6	3	6	6	6	4	6	5	7	6	6	49.9	43.5
Q09161	Q09161	4	4	4	Nuclear cap-binding protein subunit 1	NCBP1		1	4	4	4	2	4	4	4	3	3	4	4	2	4	3	3	2	4	4	4	3	3	4	4	2	4	3	3	2	4	4	4	3	3	4	4	2	4	3	3	2021-08-07	2021-08-07
Q09666	Q09666	189	189	189	Neuroblast differentiation-associated protein AHNAK	AHNAK		1	189	189	189	147	164	153	166	161	163	126	156	151	165	170	160	147	164	153	166	161	163	126	156	151	165	170	160	147	164	153	166	161	163	126	156	151	165	170	160	56.5	56.5
Q0VD83	Q0VD83	18	18	18	Apolipoprotein B receptor	APOBR		1	18	18	18	14	15	17	16	16	17	11	16	16	13	13	14	14	15	17	16	16	17	11	16	16	13	13	14	14	15	17	16	16	17	11	16	16	13	13	14	2021-08-28	2021-08-28
Q0VDF9	Q0VDF9	3	3	3	Heat shock 70 kDa protein 14	HSPA14		1	3	3	3	1	2	1	3	2	2	0	2	2	2	3	1	1	2	1	3	2	2	0	2	2	2	3	1	1	2	1	3	2	2	0	2	2	2	3	1	2021-08-12	2021-08-12
Q0VGL1	Q0VGL1	2	2	2	Ragulator complex protein LAMTOR4;Ragulator complex protein LAMTOR4, N-terminally processed	LAMTOR4		1	2	2	2	1	1	1	2	2	1	1	2	2	2	1	2	1	1	1	2	2	1	1	2	2	2	1	2	1	1	1	2	2	1	1	2	2	2	1	2	2021-03-28	2021-03-28
Q10471	Q10471	2	2	2	Polypeptide N-acetylgalactosaminyltransferase 2;Polypeptide N-acetylgalactosaminyltransferase 2 soluble form	GALNT2		1	2	2	2	2	2	2	2	2	2	2	2	2	2	2	2	2	2	2	2	2	2	2	2	2	2	2	2	2	2	2	2	2	2	2	2	2	2	2	2	2021-08-06	2021-08-06
Q10567	Q10567	15	15	9	AP-1 complex subunit beta-1	AP1B1		1	15	15	9	13	13	14	14	14	13	13	15	13	15	14	12	13	13	14	14	14	13	13	15	13	15	14	12	7	7	8	8	8	7	7	9	7	9	8	6	2021-06-17	2021-06-17
Q10570	Q10570	6	6	6	Cleavage and polyadenylation specificity factor subunit 1	CPSF1		1	6	6	6	2	5	3	5	3	4	2	1	3	3	6	5	2	5	3	5	3	4	2	1	3	3	6	5	2	5	3	5	3	4	2	1	3	3	6	5	2021-07-05	2021-07-05
Q10588	Q10588	2	2	2	ADP-ribosyl cyclase/cyclic ADP-ribose hydrolase 2	BST1		1	2	2	2	2	2	2	2	2	0	2	2	2	2	1	2	2	2	2	2	2	0	2	2	2	2	1	2	2	2	2	2	2	0	2	2	2	2	1	2	6	6
Q10589	Q10589	3	3	3	Bone marrow stromal antigen 2	BST2		1	3	3	3	3	2	2	2	2	2	2	2	2	2	2	2	3	2	2	2	2	2	2	2	2	2	2	2	3	2	2	2	2	2	2	2	2	2	2	2	2021-03-18	2021-03-18
Q10713	Q10713	15	15	15	Mitochondrial-processing peptidase subunit alpha	PMPCA		1	15	15	15	12	12	12	13	13	13	9	11	13	14	12	13	12	12	12	13	13	13	9	11	13	14	12	13	12	12	12	13	13	13	9	11	13	14	12	13	39.2	39.2
Q12768	Q12768	4	4	4	WASH complex subunit strumpellin	KIAA0196		1	4	4	4	3	3	4	2	2	4	2	1	4	3	3	1	3	3	4	2	2	4	2	1	4	3	3	1	3	3	4	2	2	4	2	1	4	3	3	1	5	5
Q12769	Q12769	3	3	3	Nuclear pore complex protein Nup160	NUP160		1	3	3	3	1	3	1	1	2	1	1	2	0	3	3	2	1	3	1	1	2	1	1	2	0	3	3	2	1	3	1	1	2	1	1	2	0	3	3	2	2021-01-03	2021-01-03
Q12792	Q12792	1	1	1	Twinfilin-1	TWF1		1	1	1	1	0	0	1	0	0	0	0	0	0	0	0	0	0	0	1	0	0	0	0	0	0	0	0	0	0	0	1	0	0	0	0	0	0	0	0	0	2021-07-03	2021-07-03
Q12797	Q12797	5	5	5	Aspartyl/asparaginyl beta-hydroxylase	ASPH		1	5	5	5	4	3	3	4	5	4	3	4	5	4	4	3	4	3	3	4	5	4	3	4	5	4	4	3	4	3	3	4	5	4	3	4	5	4	4	3	10	10
Q12824	Q12824	2	2	2	SWI/SNF-related matrix-associated actin-dependent regulator of chromatin subfamily B member 1	SMARCB1		1	2	2	2	2	2	2	2	2	2	2	2	2	2	2	2	2	2	2	2	2	2	2	2	2	2	2	2	2	2	2	2	2	2	2	2	2	2	2	2	2021-05-07	2021-05-07
Q12846	Q12846	4	4	4	Syntaxin-4	STX4		1	4	4	4	3	2	3	3	2	2	3	3	4	2	2	2	3	2	3	3	2	2	3	3	4	2	2	2	3	2	3	3	2	2	3	3	4	2	2	2	2021-05-18	2021-05-18
Q12849	Q12849	1	1	1	G-rich sequence factor 1	GRSF1		1	1	1	1	1	1	1	1	1	1	1	1	1	1	1	1	1	1	1	1	1	1	1	1	1	1	1	1	1	1	1	1	1	1	1	1	1	1	1	1	2021-06-04	2021-06-04
Q12874	Q12874	13	13	13	Splicing factor 3A subunit 3	SF3A3		1	13	13	13	6	9	8	9	12	10	8	10	11	11	10	11	6	9	8	9	12	10	8	10	11	11	10	11	6	9	8	9	12	10	8	10	11	11	10	11	38.7	38.7
Q12901	Q12901	1	1	1	Zinc finger protein 155	ZNF155		1	1	1	1	0	1	0	0	1	1	1	0	0	1	1	1	0	1	0	0	1	1	1	0	0	1	1	1	0	1	0	0	1	1	1	0	0	1	1	1	2021-02-02	2021-02-02
Q12904	Q12904	8	8	8	Aminoacyl tRNA synthase complex-interacting multifunctional protein 1;Endothelial monocyte-activating polypeptide 2	AIMP1		1	8	8	8	7	8	7	8	7	7	5	7	6	8	6	7	7	8	7	8	7	7	5	7	6	8	6	7	7	8	7	8	7	7	5	7	6	8	6	7	39.7	39.7
Q12905	Q12905	16	16	16	Interleukin enhancer-binding factor 2	ILF2		1	16	16	16	16	16	14	16	16	16	16	16	15	16	16	15	16	16	14	16	16	16	16	16	15	16	16	15	16	16	14	16	16	16	16	16	15	16	16	15	60	60
Q12906	Q12906	20	20	20	Interleukin enhancer-binding factor 3	ILF3		1	20	20	20	17	19	16	18	16	18	15	18	18	19	19	15	17	19	16	18	16	18	15	18	18	19	19	15	17	19	16	18	16	18	15	18	18	19	19	15	32.8	32.8
Q12907	Q12907	13	13	13	Vesicular integral-membrane protein VIP36	LMAN2		1	13	13	13	11	13	11	12	12	10	9	13	9	11	13	11	11	13	11	12	12	10	9	13	9	11	13	11	11	13	11	12	12	10	9	13	9	11	13	11	54.8	54.8
Q12912	Q12912	3	3	3	Lymphoid-restricted membrane protein;Processed lymphoid-restricted membrane protein	LRMP		1	3	3	3	2	3	3	3	3	3	1	3	3	3	3	3	2	3	3	3	3	3	1	3	3	3	3	3	2	3	3	3	3	3	1	3	3	3	3	3	2021-07-06	2021-07-06
Q12913	Q12913	8	8	8	Receptor-type tyrosine-protein phosphatase eta	PTPRJ		1	8	8	8	4	6	6	7	8	8	5	7	7	7	7	6	4	6	6	7	8	8	5	7	7	7	7	6	4	6	6	7	8	8	5	7	7	7	7	6	2021-06-09	2021-06-09
Q12931	Q12931	11	11	11	Heat shock protein 75 kDa, mitochondrial	TRAP1		1	11	11	11	8	11	10	10	10	10	8	10	11	10	9	10	8	11	10	10	10	10	8	10	11	10	9	10	8	11	10	10	10	10	8	10	11	10	9	10	21	21
Q12965	Q12965	12	8	8	Unconventional myosin-Ie	MYO1E		1	12	8	8	10	10	9	10	10	9	9	9	10	9	10	10	6	6	6	6	6	5	5	5	6	5	6	6	6	6	6	6	6	5	5	5	6	5	6	6	2021-08-11	2021-05-08
Q12979;P11274	Q12979	6;1	6;1	6;1	Active breakpoint cluster region-related protein	ABR		2	6	6	6	4	3	3	5	5	4	4	5	4	4	5	3	4	3	3	5	5	4	4	5	4	4	5	3	4	3	3	5	5	4	4	5	4	4	5	3	2021-01-10	2021-01-10
Q12996	Q12996	3	3	3	Cleavage stimulation factor subunit 3	CSTF3		1	3	3	3	3	2	2	2	2	3	1	2	2	3	1	2	3	2	2	2	2	3	1	2	2	3	1	2	3	2	2	2	2	3	1	2	2	3	1	2	2021-07-06	2021-07-06
Q13011	Q13011	12	12	12	Delta(3,5)-Delta(2,4)-dienoyl-CoA isomerase, mitochondrial	ECH1		1	12	12	12	9	11	9	12	10	10	10	11	10	9	12	10	9	11	9	12	10	10	10	11	10	9	12	10	9	11	9	12	10	10	10	11	10	9	12	10	48.2	48.2
Q13043;Q13188	Q13043	5;2	5;2	5;2	Serine/threonine-protein kinase 4;Serine/threonine-protein kinase 4 37kDa subunit;Serine/threonine-protein kinase 4 18kDa subunit	STK4		2	5	5	5	3	4	4	4	4	4	3	4	4	5	4	4	3	4	4	4	4	4	3	4	4	5	4	4	3	4	4	4	4	4	3	4	4	5	4	4	2021-04-14	2021-04-14
Q13045	Q13045	17	17	17	Protein flightless-1 homolog	FLII		1	17	17	17	11	14	11	15	16	15	11	14	15	13	15	12	11	14	11	15	16	15	11	14	15	13	15	12	11	14	11	15	16	15	11	14	15	13	15	12	2021-06-23	2021-06-23
Q13057	Q13057	6	6	6	Bifunctional coenzyme A synthase;Phosphopantetheine adenylyltransferase;Dephospho-CoA kinase	COASY		1	6	6	6	2	5	3	5	5	5	4	3	3	5	4	5	2	5	3	5	5	5	4	3	3	5	4	5	2	5	3	5	5	5	4	3	3	5	4	5	2021-02-20	2021-02-20
Q13084	Q13084	2	2	2	39S ribosomal protein L28, mitochondrial	MRPL28		1	2	2	2	2	1	1	2	2	2	1	2	2	2	2	2	2	1	1	2	2	2	1	2	2	2	2	2	2	1	1	2	2	2	1	2	2	2	2	2	2021-04-09	2021-04-09
Q13094	Q13094	2	2	2	Lymphocyte cytosolic protein 2	LCP2		1	2	2	2	2	2	1	2	2	1	2	1	1	1	2	2	2	2	1	2	2	1	2	1	1	1	2	2	2	2	1	2	2	1	2	1	1	1	2	2	2021-06-05	2021-06-05
Q13098	Q13098	2	2	2	COP9 signalosome complex subunit 1	GPS1		1	2	2	2	2	1	2	2	2	2	2	2	2	2	2	2	2	1	2	2	2	2	2	2	2	2	2	2	2	1	2	2	2	2	2	2	2	2	2	2	2021-03-07	2021-03-07
Q13107;P51784	Q13107	4;1	4;1	3;0	Ubiquitin carboxyl-terminal hydrolase 4	USP4		2	4	4	3	4	3	2	2	2	2	3	2	3	2	2	2	4	3	2	2	2	2	3	2	3	2	2	2	3	3	2	2	2	2	2	2	3	2	2	2	2021-04-06	2021-04-06
Q13123	Q13123	4	4	4	Protein Red	IK		1	4	4	4	4	4	4	4	4	4	3	4	4	4	4	4	4	4	4	4	4	4	3	4	4	4	4	4	4	4	4	4	4	4	3	4	4	4	4	4	2021-09-09	2021-09-09
Q13131;P54646	Q13131	3;1	3;1	3;1	5-AMP-activated protein kinase catalytic subunit alpha-1	PRKAA1		2	3	3	3	2	3	2	2	0	1	1	2	1	1	2	2	2	3	2	2	0	1	1	2	1	1	2	2	2	3	2	2	0	1	1	2	1	1	2	2	2021-01-08	2021-01-08
Q13148	Q13148	12	12	12	TAR DNA-binding protein 43	TARDBP		1	12	12	12	11	11	8	12	11	11	11	12	12	12	11	12	11	11	8	12	11	11	11	12	12	12	11	12	11	11	8	12	11	11	11	12	12	12	11	12	44	44
Q13151	Q13151	8	8	8	Heterogeneous nuclear ribonucleoprotein A0	HNRNPA0		1	8	8	8	7	8	7	8	8	8	8	7	8	6	7	8	7	8	7	8	8	8	8	7	8	6	7	8	7	8	7	8	8	8	8	7	8	6	7	8	2021-05-31	2021-05-31
Q13155	Q13155	5	5	5	Aminoacyl tRNA synthase complex-interacting multifunctional protein 2	AIMP2		1	5	5	5	4	4	5	4	4	4	5	4	4	4	4	4	4	4	5	4	4	4	5	4	4	4	4	4	4	4	5	4	4	4	5	4	4	4	4	4	2021-03-25	2021-03-25
Q13158	Q13158	2	2	2	FAS-associated death domain protein	FADD		1	2	2	2	2	2	1	2	2	2	2	2	2	2	2	2	2	2	1	2	2	2	2	2	2	2	2	2	2	2	1	2	2	2	2	2	2	2	2	2	2021-02-21	2021-02-21
Q13162	Q13162	11	8	8	Peroxiredoxin-4	PRDX4		1	11	8	8	11	11	10	10	11	11	10	11	9	10	9	9	8	8	7	8	8	8	7	8	6	7	7	7	8	8	7	8	8	8	7	8	6	7	7	7	57.6	50.6
Q13177	Q13177	21	21	16	Serine/threonine-protein kinase PAK 2;PAK-2p27;PAK-2p34	PAK2		1	21	21	16	16	13	17	17	17	15	15	19	18	16	16	15	16	13	17	17	17	15	15	19	18	16	16	15	12	10	12	12	13	11	11	14	13	12	12	12	59.7	59.7
Q13185;P83916	Q13185	4;1	4;1	4;1	Chromobox protein homolog 3	CBX3		2	4	4	4	3	4	2	4	2	3	3	3	3	3	3	2	3	4	2	4	2	3	3	3	3	3	3	2	3	4	2	4	2	3	3	3	3	3	3	2	2021-07-25	2021-07-25
Q13200	Q13200	9	9	9	26S proteasome non-ATPase regulatory subunit 2	PSMD2		1	9	9	9	9	9	7	9	8	9	9	8	9	9	9	9	9	9	7	9	8	9	9	8	9	9	9	9	9	9	7	9	8	9	9	8	9	9	9	9	2021-02-15	2021-02-15
Q13217	Q13217	7	7	7	DnaJ homolog subfamily C member 3	DNAJC3		1	7	7	7	7	6	6	5	6	7	6	5	6	7	6	5	7	6	6	5	6	7	6	5	6	7	6	5	7	6	6	5	6	7	6	5	6	7	6	5	2021-04-21	2021-04-21
Q13232	Q13232	4	4	4	Nucleoside diphosphate kinase 3	NME3		1	4	4	4	3	3	2	3	3	3	2	3	3	3	4	3	3	3	2	3	3	3	2	3	3	3	4	3	3	3	2	3	3	3	2	3	3	3	4	3	2021-06-29	2021-06-29
Q13242	Q13242	6	6	6	Serine/arginine-rich splicing factor 9	SRSF9		1	6	6	6	4	6	6	5	4	5	4	5	5	5	5	5	4	6	6	5	4	5	4	5	5	5	5	5	4	6	6	5	4	5	4	5	5	5	5	5	2021-04-29	2021-04-29
Q13247	Q13247	2	2	2	Serine/arginine-rich splicing factor 6	SRSF6		1	2	2	2	2	2	2	2	2	1	1	1	2	2	2	1	2	2	2	2	2	1	1	1	2	2	2	1	2	2	2	2	2	1	1	1	2	2	2	1	2021-07-06	2021-07-06
Q13263	Q13263	25	25	25	Transcription intermediary factor 1-beta	TRIM28		1	25	25	25	21	23	21	21	23	23	18	24	24	23	21	20	21	23	21	21	23	23	18	24	24	23	21	20	21	23	21	21	23	23	18	24	24	23	21	20	49	49
Q13283	Q13283	13	13	12	Ras GTPase-activating protein-binding protein 1	G3BP1		1	13	13	12	9	9	11	9	9	10	8	11	10	10	12	11	9	9	11	9	9	10	8	11	10	10	12	11	9	9	10	8	8	9	8	10	9	10	11	11	39.1	39.1
Q13287	Q13287	2	2	2	N-myc-interactor	NMI		1	2	2	2	2	2	2	2	2	2	2	2	2	2	2	2	2	2	2	2	2	2	2	2	2	2	2	2	2	2	2	2	2	2	2	2	2	2	2	2	2021-07-10	2021-07-10
Q13303;Q14722	Q13303	8;1	8;1	8;1	Voltage-gated potassium channel subunit beta-2	KCNAB2		2	8	8	8	4	5	5	6	5	6	3	7	5	6	7	5	4	5	5	6	5	6	3	7	5	6	7	5	4	5	5	6	5	6	3	7	5	6	7	5	36.2	36.2
Q13310;P0CB38	Q13310	23;2	23;2	16;2	Polyadenylate-binding protein 4	PABPC4		2	23	23	16	20	17	19	19	22	21	18	21	20	20	19	21	20	17	19	19	22	21	18	21	20	20	19	21	14	12	15	16	15	16	14	14	14	15	15	15	41.8	41.8
Q13315	Q13315	2	2	2	Serine-protein kinase ATM	ATM		1	2	2	2	2	2	2	2	1	1	2	1	1	2	1	2	2	2	2	2	1	1	2	1	1	2	1	2	2	2	2	2	1	1	2	1	1	2	1	2	0.7	0.7
Q13347	Q13347	8	8	8	Eukaryotic translation initiation factor 3 subunit I	EIF3I		1	8	8	8	6	7	6	7	7	7	7	6	6	8	6	6	6	7	6	7	7	7	7	6	6	8	6	6	6	7	6	7	7	7	7	6	6	8	6	6	36.6	36.6
Q13363;P56545	Q13363	3;1	3;1	3;1	C-terminal-binding protein 1	CTBP1		2	3	3	3	3	3	3	3	3	3	2	3	3	3	3	3	3	3	3	3	3	3	2	3	3	3	3	3	3	3	3	3	3	3	2	3	3	3	3	3	2021-04-08	2021-04-08
Q13404	Q13404	4	2	2	Ubiquitin-conjugating enzyme E2 variant 1	UBE2V1		1	4	2	2	3	4	3	4	3	3	4	3	3	4	3	3	1	2	2	2	1	1	2	1	1	2	1	1	1	2	2	2	1	1	2	1	1	2	1	1	2021-03-29	2021-06-15
Q13405	Q13405	3	3	3	39S ribosomal protein L49, mitochondrial	MRPL49		1	3	3	3	1	1	2	2	1	2	2	1	1	2	3	2	1	1	2	2	1	2	2	1	1	2	3	2	1	1	2	2	1	2	2	1	1	2	3	2	2021-05-23	2021-05-23
Q13409	Q13409	6	6	6	Cytoplasmic dynein 1 intermediate chain 2	DYNC1I2		1	6	6	6	5	5	5	6	6	6	2	6	6	5	5	5	5	5	5	6	6	6	2	6	6	5	5	5	5	5	5	6	6	6	2	6	6	5	5	5	11	11
Q13418	Q13418	9	9	9	Integrin-linked protein kinase	ILK		1	9	9	9	4	8	7	7	9	9	5	8	7	8	9	7	4	8	7	7	9	9	5	8	7	8	9	7	4	8	7	7	9	9	5	8	7	8	9	7	2021-05-28	2021-05-28
Q13423	Q13423	29	29	29	NAD(P) transhydrogenase, mitochondrial	NNT		1	29	29	29	25	26	26	24	24	25	23	27	26	27	28	26	25	26	26	24	24	25	23	27	26	27	28	26	25	26	26	24	24	25	23	27	26	27	28	26	31	31
Q13428	Q13428	4	4	4	Treacle protein	TCOF1		1	4	4	4	1	2	1	3	2	2	2	3	1	1	1	1	1	2	1	3	2	2	2	3	1	1	1	1	1	2	1	3	2	2	2	3	1	1	1	1	2021-08-02	2021-08-02
Q13435	Q13435	16	16	16	Splicing factor 3B subunit 2	SF3B2		1	16	16	16	8	12	14	14	13	14	9	12	9	14	14	13	8	12	14	14	13	14	9	12	9	14	14	13	8	12	14	14	13	14	9	12	9	14	14	13	27	27
Q13438	Q13438	1	1	1	Protein OS-9	OS9		1	1	1	1	1	1	1	1	1	1	0	1	1	1	1	1	1	1	1	1	1	1	0	1	1	1	1	1	1	1	1	1	1	1	0	1	1	1	1	1	2021-06-01	2021-06-01
Q13442	Q13442	3	3	3	28 kDa heat- and acid-stable phosphoprotein	PDAP1		1	3	3	3	1	1	2	3	3	2	2	3	2	2	3	1	1	1	2	3	3	2	2	3	2	2	3	1	1	1	2	3	3	2	2	3	2	2	3	1	2021-03-13	2021-03-13
Q13443	Q13443	2	2	2	Disintegrin and metalloproteinase domain-containing protein 9	ADAM9		1	2	2	2	2	1	0	1	2	2	1	2	1	1	1	1	2	1	0	1	2	2	1	2	1	1	1	1	2	1	0	1	2	2	1	2	1	1	1	1	2021-07-05	2021-07-05
Q13445	Q13445	1	1	1	Transmembrane emp24 domain-containing protein 1	TMED1		1	1	1	1	1	1	1	1	0	1	1	0	0	0	0	1	1	1	1	1	0	1	1	0	0	0	0	1	1	1	1	1	0	1	1	0	0	0	0	1	4	4
Q13451	Q13451	3	3	3	Peptidyl-prolyl cis-trans isomerase FKBP5;Peptidyl-prolyl cis-trans isomerase FKBP5, N-terminally processed	FKBP5		1	3	3	3	2	2	3	1	2	2	1	2	3	2	3	3	2	2	3	1	2	2	1	2	3	2	3	3	2	2	3	1	2	2	1	2	3	2	3	3	2021-07-07	2021-07-07
Q13459	Q13459	9	9	9	Unconventional myosin-IXb	MYO9B		1	9	9	9	4	6	6	5	7	7	4	5	7	3	7	7	4	6	6	5	7	7	4	5	7	3	7	7	4	6	6	5	7	7	4	5	7	3	7	7	2021-05-07	2021-05-07
Q13464;O75116	Q13464	7;1	7;1	7;1	Rho-associated protein kinase 1	ROCK1		2	7	7	7	5	4	3	4	5	5	4	4	4	5	6	5	5	4	3	4	5	5	4	4	4	5	6	5	5	4	3	4	5	5	4	4	4	5	6	5	2021-03-06	2021-03-06
Q13488	Q13488	7	7	7	V-type proton ATPase 116 kDa subunit a isoform 3	TCIRG1		1	7	7	7	5	6	6	6	5	6	5	6	4	5	4	6	5	6	6	6	5	6	5	6	4	5	4	6	5	6	6	6	5	6	5	6	4	5	4	6	2021-07-13	2021-07-13
Q13492;O60641	Q13492	6;1	6;1	6;1	Phosphatidylinositol-binding clathrin assembly protein	PICALM		2	6	6	6	5	5	5	5	6	4	5	6	5	5	6	5	5	5	5	5	6	4	5	6	5	5	6	5	5	5	5	5	6	4	5	6	5	5	6	5	15	15
Q13501	Q13501	5	5	5	Sequestosome-1	SQSTM1		1	5	5	5	5	4	4	5	5	5	4	5	4	4	4	4	5	4	4	5	5	5	4	5	4	4	4	4	5	4	4	5	5	5	4	5	4	4	4	4	2021-03-19	2021-03-19
Q13505	Q13505	3	3	3	Metaxin-1	MTX1		1	3	3	3	2	3	3	3	3	3	1	2	3	3	3	2	2	3	3	3	3	3	1	2	3	3	3	2	2	3	3	3	3	3	1	2	3	3	3	2	2021-02-11	2021-02-11
Q13510	Q13510	5	5	5	Acid ceramidase;Acid ceramidase subunit alpha;Acid ceramidase subunit beta	ASAH1		1	5	5	5	5	5	5	5	5	5	5	5	5	4	4	5	5	5	5	5	5	5	5	5	5	4	4	5	5	5	5	5	5	5	5	5	5	4	4	5	2021-04-14	2021-04-14
Q13523	Q13523	2	2	2	Serine/threonine-protein kinase PRP4 homolog	PRPF4B		1	2	2	2	1	1	2	2	1	1	0	2	2	2	2	2	1	1	2	2	1	1	0	2	2	2	2	2	1	1	2	2	1	1	0	2	2	2	2	2	2021-02-03	2021-02-03
Q13526	Q13526	1	1	1	Peptidyl-prolyl cis-trans isomerase NIMA-interacting 1	PIN1		1	1	1	1	1	1	1	1	1	1	0	1	1	1	1	1	1	1	1	1	1	1	0	1	1	1	1	1	1	1	1	1	1	1	0	1	1	1	1	1	2021-02-09	2021-02-09
Q13541	Q13541	3	3	3	Eukaryotic translation initiation factor 4E-binding protein 1	EIF4EBP1		1	3	3	3	3	2	3	2	3	3	2	2	2	2	1	2	3	2	3	2	3	3	2	2	2	2	1	2	3	2	3	2	3	3	2	2	2	2	1	2	35.6	35.6
Q13547	Q13547	5	5	1	Histone deacetylase 1	HDAC1		1	5	5	1	4	4	4	4	4	3	4	3	3	4	3	4	4	4	4	4	4	3	4	3	3	4	3	4	1	1	1	1	1	1	1	1	1	1	1	1	2021-08-11	2021-08-11
Q13557	Q13557	7	7	5	Calcium/calmodulin-dependent protein kinase type II subunit delta	CAMK2D		1	7	7	5	6	7	7	6	4	6	6	5	6	6	5	6	6	7	7	6	4	6	6	5	6	6	5	6	5	5	5	4	3	5	5	4	4	4	4	5	2021-02-21	2021-02-21
Q13561	Q13561	12	12	12	Dynactin subunit 2	DCTN2		1	12	12	12	9	11	10	10	10	9	10	10	9	10	9	10	9	11	10	10	10	9	10	10	9	10	9	10	9	11	10	10	10	9	10	10	9	10	9	10	43.4	43.4
Q13564	Q13564	3	3	3	NEDD8-activating enzyme E1 regulatory subunit	NAE1		1	3	3	3	2	1	3	3	3	1	1	2	3	1	2	2	2	1	3	3	3	1	1	2	3	1	2	2	2	1	3	3	3	1	1	2	3	1	2	2	2021-02-08	2021-02-08
Q13568	Q13568	2	2	2	Interferon regulatory factor 5	IRF5		1	2	2	2	2	1	1	2	2	2	1	2	2	1	1	2	2	1	1	2	2	2	1	2	2	1	1	2	2	1	1	2	2	2	1	2	2	1	1	2	2021-04-05	2021-04-05
Q13573	Q13573	7	7	7	SNW domain-containing protein 1	SNW1		1	7	7	7	6	6	5	6	6	7	3	6	7	6	6	5	6	6	5	6	6	7	3	6	7	6	6	5	6	6	5	6	6	7	3	6	7	6	6	5	2021-09-23	2021-09-23
Q13574	Q13574	1	1	1	Diacylglycerol kinase zeta	DGKZ		1	1	1	1	1	1	1	1	1	1	1	1	1	1	1	1	1	1	1	1	1	1	1	1	1	1	1	1	1	1	1	1	1	1	1	1	1	1	1	1	2021-04-01	2021-04-01
Q13576	Q13576	3	2	2	Ras GTPase-activating-like protein IQGAP2	IQGAP2		1	3	2	2	3	3	3	3	3	3	3	3	3	3	3	2	2	2	2	2	2	2	2	2	2	2	2	1	2	2	2	2	2	2	2	2	2	2	2	1	2021-08-01	2021-02-01
Q13586	Q13586	8	8	8	Stromal interaction molecule 1	STIM1		1	8	8	8	6	7	7	6	8	6	5	7	7	8	8	8	6	7	7	6	8	6	5	7	7	8	8	8	6	7	7	6	8	6	5	7	7	8	8	8	2021-04-19	2021-04-19
Q13595	Q13595	1	1	1	Transformer-2 protein homolog alpha	TRA2A		1	1	1	1	1	1	1	1	1	1	1	1	1	1	1	1	1	1	1	1	1	1	1	1	1	1	1	1	1	1	1	1	1	1	1	1	1	1	1	1	5	5
Q13596	Q13596	3	3	3	Sorting nexin-1	SNX1		1	3	3	3	2	2	2	2	3	3	2	3	3	3	2	2	2	2	2	2	3	3	2	3	3	3	2	2	2	2	2	2	3	3	2	3	3	3	2	2	2021-03-10	2021-03-10
Q13601	Q13601	1	1	1	KRR1 small subunit processome component homolog	KRR1		1	1	1	1	1	1	1	1	1	1	1	1	1	1	1	1	1	1	1	1	1	1	1	1	1	1	1	1	1	1	1	1	1	1	1	1	1	1	1	1	2021-07-03	2021-07-03
Q13617	Q13617	4	4	4	Cullin-2	CUL2		1	4	4	4	1	4	2	3	1	2	1	3	2	2	2	3	1	4	2	3	1	2	1	3	2	2	2	3	1	4	2	3	1	2	1	3	2	2	2	3	2021-08-07	2021-08-07
Q13618	Q13618	2	2	2	Cullin-3	CUL3		1	2	2	2	2	1	1	1	0	1	2	1	2	0	1	1	2	1	1	1	0	1	2	1	2	0	1	1	2	1	1	1	0	1	2	1	2	0	1	1	2021-04-03	2021-04-03
Q13620;Q13619	Q13620;Q13619	4;2	4;2	4;2	Cullin-4B;Cullin-4A	CUL4B;CUL4A	;	2	4	4	4	2	3	1	3	3	3	3	3	3	4	3	4	2	3	1	3	3	3	3	3	3	4	3	4	2	3	1	3	3	3	3	3	3	4	3	4	2021-07-04	2021-07-04
Q13625	Q13625	2	2	2	Apoptosis-stimulating of p53 protein 2	TP53BP2		1	2	2	2	1	2	1	0	1	1	2	0	2	1	0	1	1	2	1	0	1	1	2	0	2	1	0	1	1	2	1	0	1	1	2	0	2	1	0	1	2021-03-01	2021-03-01
Q13630	Q13630	4	4	4	GDP-L-fucose synthase	TSTA3		1	4	4	4	3	4	4	4	4	4	3	4	4	4	4	4	3	4	4	4	4	4	3	4	4	4	4	4	3	4	4	4	4	4	3	4	4	4	4	4	2021-09-19	2021-09-19
Q13636;Q9UL26	Q13636	6;2	6;2	6;2	Ras-related protein Rab-31	RAB31		2	6	6	6	5	5	5	6	6	6	5	6	6	5	5	5	5	5	5	6	6	6	5	6	6	5	5	5	5	5	5	6	6	6	5	6	6	5	5	5	2021-04-30	2021-04-30
Q13637	Q13637	2	2	2	Ras-related protein Rab-32	RAB32		1	2	2	2	2	1	1	0	2	2	2	1	1	1	2	1	2	1	1	0	2	2	2	1	1	1	2	1	2	1	1	0	2	2	2	1	1	1	2	1	2021-04-16	2021-04-16
Q13724	Q13724	9	9	9	Mannosyl-oligosaccharide glucosidase	MOGS		1	9	9	9	7	8	8	7	6	7	6	7	6	8	7	4	7	8	8	7	6	7	6	7	6	8	7	4	7	8	8	7	6	7	6	7	6	8	7	4	2021-02-15	2021-02-15
Q13740	Q13740	11	11	11	CD166 antigen	ALCAM		1	11	11	11	11	10	8	11	9	10	9	9	9	11	10	10	11	10	8	11	9	10	9	9	9	11	10	10	11	10	8	11	9	10	9	9	9	11	10	10	2021-04-24	2021-04-24
Q13761	Q13761	1	1	1	Runt-related transcription factor 3	RUNX3		1	1	1	1	1	1	1	1	1	1	1	1	1	0	1	1	1	1	1	1	1	1	1	1	1	0	1	1	1	1	1	1	1	1	1	1	1	0	1	1	2021-06-03	2021-06-03
Q13813	Q13813	4	4	4	Spectrin alpha chain, non-erythrocytic 1	SPTAN1		1	4	4	4	2	3	4	4	2	3	3	3	2	4	4	4	2	3	4	4	2	3	3	3	2	4	4	4	2	3	4	4	2	3	3	3	2	4	4	4	2021-07-01	2021-07-01
Q13838	Q13838	17	17	6	Spliceosome RNA helicase DDX39B	DDX39B		1	17	17	6	13	16	14	16	17	16	15	15	15	15	15	14	13	16	14	16	17	16	15	15	15	15	15	14	3	6	4	6	6	6	4	4	5	6	6	5	48.8	48.8
Q13867	Q13867	4	4	4	Bleomycin hydrolase	BLMH		1	4	4	4	3	2	3	2	2	1	3	2	2	2	1	2	3	2	3	2	2	1	3	2	2	2	1	2	3	2	3	2	2	1	3	2	2	2	1	2	2021-02-11	2021-02-11
Q13868	Q13868	2	2	2	Exosome complex component RRP4	EXOSC2		1	2	2	2	1	2	2	1	2	2	1	2	1	2	2	1	1	2	2	1	2	2	1	2	1	2	2	1	1	2	2	1	2	2	1	2	1	2	2	1	2021-05-05	2021-05-05
Q13884	Q13884	8	8	8	Beta-1-syntrophin	SNTB1		1	8	8	8	4	6	6	7	5	7	4	6	8	7	8	6	4	6	6	7	5	7	4	6	8	7	8	6	4	6	6	7	5	7	4	6	8	7	8	6	2021-02-21	2021-02-21
Q9BVA1;Q13885	Q9BVA1;Q13885	26;26	3;3	3;3	Tubulin beta-2B chain;Tubulin beta-2A chain	TUBB2B;TUBB2A	;	2	26	3	3	21	23	20	23	23	22	20	23	25	22	23	22	2	2	2	1	2	1	0	1	2	0	1	0	2	2	2	1	2	1	0	1	2	0	1	0	63.8	2021-06-16
Q13907	Q13907	2	2	2	Isopentenyl-diphosphate Delta-isomerase 1	IDI1		1	2	2	2	1	1	1	1	1	1	2	2	2	1	1	1	1	1	1	1	1	1	2	2	2	1	1	1	1	1	1	1	1	1	2	2	2	1	1	1	2021-07-13	2021-07-13
Q14008	Q14008	3	3	3	Cytoskeleton-associated protein 5	CKAP5		1	3	3	3	1	3	3	2	1	2	2	3	3	2	3	2	1	3	3	2	1	2	2	3	3	2	3	2	1	3	3	2	1	2	2	3	3	2	3	2	2021-07-02	2021-07-02
Q14011	Q14011	3	3	3	Cold-inducible RNA-binding protein	CIRBP		1	3	3	3	2	3	3	3	3	2	1	3	2	3	2	2	2	3	3	3	3	2	1	3	2	3	2	2	2	3	3	3	3	2	1	3	2	3	2	2	2021-09-16	2021-09-16
Q14012	Q14012	5	5	5	Calcium/calmodulin-dependent protein kinase type 1	CAMK1		1	5	5	5	4	5	5	5	5	5	4	5	5	5	5	5	4	5	5	5	5	5	4	5	5	5	5	5	4	5	5	5	5	5	4	5	5	5	5	5	2021-07-25	2021-07-25
Q14019	Q14019	16	16	16	Coactosin-like protein	COTL1		1	16	16	16	14	15	15	16	15	15	15	16	16	16	15	16	14	15	15	16	15	15	15	16	16	16	15	16	14	15	15	16	15	15	15	16	16	16	15	16	85.2	85.2
Q14061	Q14061	3	3	3	Cytochrome c oxidase copper chaperone	COX17		1	3	3	3	3	2	3	3	3	3	2	3	3	3	3	2	3	2	3	3	3	3	2	3	3	3	3	2	3	2	3	3	3	3	2	3	3	3	3	2	84.1	84.1
Q14103	Q14103	21	21	20	Heterogeneous nuclear ribonucleoprotein D0	HNRNPD		1	21	21	20	16	20	16	18	19	17	15	17	18	17	19	17	16	20	16	18	19	17	15	17	18	17	19	17	15	19	15	17	18	16	14	16	17	16	18	16	47.9	47.9
Q14108	Q14108	9	9	9	Lysosome membrane protein 2	SCARB2		1	9	9	9	7	7	7	8	7	7	7	7	7	7	6	7	7	7	7	8	7	7	7	7	7	7	6	7	7	7	7	8	7	7	7	7	7	7	6	7	2021-05-24	2021-05-24
Q14137	Q14137	4	4	4	Ribosome biogenesis protein BOP1	BOP1		1	4	4	4	4	4	3	4	4	4	3	4	4	4	4	4	4	4	3	4	4	4	3	4	4	4	4	4	4	4	3	4	4	4	3	4	4	4	4	4	2021-05-10	2021-05-10
Q14139	Q14139	1	1	1	Ubiquitin conjugation factor E4 A	UBE4A		1	1	1	1	1	0	1	0	1	1	0	1	1	0	1	0	1	0	1	0	1	1	0	1	1	0	1	0	1	0	1	0	1	1	0	1	1	0	1	0	2021-03-01	2021-03-01
Q14152	Q14152	18	18	18	Eukaryotic translation initiation factor 3 subunit A	EIF3A		1	18	18	18	15	16	17	16	17	16	12	17	16	15	15	17	15	16	17	16	17	16	12	17	16	15	15	17	15	16	17	16	17	16	12	17	16	15	15	17	2021-03-14	2021-03-14
Q14155	Q14155	6	6	4	Rho guanine nucleotide exchange factor 7	ARHGEF7		1	6	6	4	3	3	4	5	3	2	1	5	4	2	3	4	3	3	4	5	3	2	1	5	4	2	3	4	2	1	2	3	2	1	1	4	2	1	1	3	2021-07-08	2021-07-08
Q14157	Q14157	5	5	5	Ubiquitin-associated protein 2-like	UBAP2L		1	5	5	5	4	5	5	5	5	5	3	5	5	5	5	5	4	5	5	5	5	5	3	5	5	5	5	5	4	5	5	5	5	5	3	5	5	5	5	5	2021-01-07	2021-01-07
Q14160;Q9BTT6	Q14160	6;1	6;1	6;1	Protein scribble homolog	SCRIB		2	6	6	6	6	5	6	6	6	6	5	5	4	6	6	6	6	5	6	6	6	6	5	5	4	6	6	6	6	5	6	6	6	6	5	5	4	6	6	6	2021-08-07	2021-08-07
Q14161	Q14161	1	1	1	ARF GTPase-activating protein GIT2	GIT2		1	1	1	1	1	1	1	1	1	1	1	1	1	1	1	1	1	1	1	1	1	1	1	1	1	1	1	1	1	1	1	1	1	1	1	1	1	1	1	1	2021-03-03	2021-03-03
Q14165	Q14165	9	9	9	Malectin	MLEC		1	9	9	9	7	8	7	9	7	8	8	9	7	7	9	8	7	8	7	9	7	8	8	9	7	7	9	8	7	8	7	9	7	8	8	9	7	7	9	8	39	39
Q14166	Q14166	9	9	9	Tubulin--tyrosine ligase-like protein 12	TTLL12		1	9	9	9	7	8	7	8	8	7	7	8	9	8	9	8	7	8	7	8	8	7	7	8	9	8	9	8	7	8	7	8	8	7	7	8	9	8	9	8	28	28
Q14203	Q14203	12	12	12	Dynactin subunit 1	DCTN1		1	12	12	12	9	11	11	10	11	11	10	10	12	11	12	10	9	11	11	10	11	11	10	10	12	11	12	10	9	11	11	10	11	11	10	10	12	11	12	10	2021-09-11	2021-09-11
Q14204	Q14204	68	68	68	Cytoplasmic dynein 1 heavy chain 1	DYNC1H1		1	68	68	68	53	52	45	54	58	50	43	55	52	59	57	57	53	52	45	54	58	50	43	55	52	59	57	57	53	52	45	54	58	50	43	55	52	59	57	57	2021-06-19	2021-06-19
Q14232	Q14232	3	3	3	Translation initiation factor eIF-2B subunit alpha	EIF2B1		1	3	3	3	2	1	2	2	3	1	1	2	3	2	3	2	2	1	2	2	3	1	1	2	3	2	3	2	2	1	2	2	3	1	1	2	3	2	3	2	2021-07-15	2021-07-15
Q14240	Q14240	11	4	4	Eukaryotic initiation factor 4A-II;Eukaryotic initiation factor 4A-II, N-terminally processed	EIF4A2		1	11	4	4	11	9	10	11	10	10	11	9	10	10	11	9	4	3	4	4	4	4	4	3	4	4	4	3	4	3	4	4	4	4	4	3	4	4	4	3	32.2	2021-01-11
Q14249	Q14249	2	2	2	Endonuclease G, mitochondrial	ENDOG		1	2	2	2	1	1	2	1	2	1	1	0	2	1	1	1	1	1	2	1	2	1	1	0	2	1	1	1	1	1	2	1	2	1	1	0	2	1	1	1	2021-07-07	2021-07-07
Q14254	Q14254	3	3	3	Flotillin-2	FLOT2		1	3	3	3	2	1	2	2	2	2	0	1	2	2	2	0	2	1	2	2	2	2	0	1	2	2	2	0	2	1	2	2	2	2	0	1	2	2	2	0	2021-05-10	2021-05-10
Q14257	Q14257	2	2	2	Reticulocalbin-2	RCN2		1	2	2	2	1	2	1	1	1	2	1	1	1	1	1	1	1	2	1	1	1	2	1	1	1	1	1	1	1	2	1	1	1	2	1	1	1	1	1	1	2021-01-09	2021-01-09
Q14258	Q14258	12	12	12	E3 ubiquitin/ISG15 ligase TRIM25	TRIM25		1	12	12	12	11	11	10	12	11	10	11	12	11	11	11	11	11	11	10	12	11	10	11	12	11	11	11	11	11	11	10	12	11	10	11	12	11	11	11	11	2021-03-24	2021-03-24
Q14289	Q14289	8	8	8	Protein-tyrosine kinase 2-beta	PTK2B		1	8	8	8	6	6	6	6	8	5	6	5	6	7	6	6	6	6	6	6	8	5	6	5	6	7	6	6	6	6	6	6	8	5	6	5	6	7	6	6	2021-09-08	2021-09-08
Q14318	Q14318	2	2	2	Peptidyl-prolyl cis-trans isomerase FKBP8	FKBP8		1	2	2	2	0	1	1	1	1	2	0	2	2	1	2	1	0	1	1	1	1	2	0	2	2	1	2	1	0	1	1	1	1	2	0	2	2	1	2	1	2021-05-07	2021-05-07
Q14331	Q14331	1	1	1	Protein FRG1	FRG1		1	1	1	1	1	1	1	1	1	1	0	1	1	1	1	1	1	1	1	1	1	1	0	1	1	1	1	1	1	1	1	1	1	1	0	1	1	1	1	1	5	5
Q14344	Q14344	4	4	4	Guanine nucleotide-binding protein subunit alpha-13	GNA13		1	4	4	4	4	4	4	4	4	4	4	4	4	4	4	4	4	4	4	4	4	4	4	4	4	4	4	4	4	4	4	4	4	4	4	4	4	4	4	4	2021-08-17	2021-08-17
Q14353	Q14353	2	2	2	Guanidinoacetate N-methyltransferase	GAMT		1	2	2	2	0	2	1	1	2	2	0	1	1	1	2	1	0	2	1	1	2	2	0	1	1	1	2	1	0	2	1	1	2	2	0	1	1	1	2	1	2021-01-16	2021-01-16
Q14444	Q14444	9	9	9	Caprin-1	CAPRIN1		1	9	9	9	7	8	5	7	7	6	7	7	8	7	7	8	7	8	5	7	7	6	7	7	8	7	7	8	7	8	5	7	7	6	7	7	8	7	7	8	2021-02-18	2021-02-18
Q14498	Q14498	9	9	9	RNA-binding protein 39	RBM39		1	9	9	9	7	9	7	8	9	9	6	7	8	8	9	7	7	9	7	8	9	9	6	7	8	8	9	7	7	9	7	8	9	9	6	7	8	8	9	7	17	17
Q14554	Q14554	3	3	3	Protein disulfide-isomerase A5	PDIA5		1	3	3	3	1	2	1	2	3	2	2	2	2	3	3	2	1	2	1	2	3	2	2	2	2	3	3	2	1	2	1	2	3	2	2	2	2	3	3	2	2021-05-08	2021-05-08
Q14566	Q14566	9	9	9	DNA replication licensing factor MCM6	MCM6		1	9	9	9	1	7	6	7	6	5	3	5	5	6	8	8	1	7	6	7	6	5	3	5	5	6	8	8	1	7	6	7	6	5	3	5	5	6	8	8	2021-09-14	2021-09-14
Q14643;Q14573;Q14571	Q14643	7;1;1	7;1;1	7;1;1	Inositol 1,4,5-trisphosphate receptor type 1	ITPR1		3	7	7	7	4	4	5	5	4	5	3	5	5	6	5	6	4	4	5	5	4	5	3	5	5	6	5	6	4	4	5	5	4	5	3	5	5	6	5	6	2021-02-04	2021-02-04
Q14644	Q14644	1	1	1	Ras GTPase-activating protein 3	RASA3		1	1	1	1	1	1	1	1	1	1	1	1	1	1	1	1	1	1	1	1	1	1	1	1	1	1	1	1	1	1	1	1	1	1	1	1	1	1	1	1	2021-04-02	2021-04-02
Q14653	Q14653	1	1	1	Interferon regulatory factor 3	IRF3		1	1	1	1	1	1	1	1	1	1	1	1	1	1	1	1	1	1	1	1	1	1	1	1	1	1	1	1	1	1	1	1	1	1	1	1	1	1	1	1	2021-08-06	2021-08-06
Q14657	Q14657	1	1	1	EKC/KEOPS complex subunit LAGE3	LAGE3		1	1	1	1	0	1	1	1	1	1	1	1	1	1	1	1	0	1	1	1	1	1	1	1	1	1	1	1	0	1	1	1	1	1	1	1	1	1	1	1	2021-01-16	2021-01-16
Q14669	Q14669	6	6	6	E3 ubiquitin-protein ligase TRIP12	TRIP12		1	6	6	6	4	5	6	6	4	4	4	5	6	5	5	5	4	5	6	6	4	4	4	5	6	5	5	5	4	5	6	6	4	4	4	5	6	5	5	5	2021-03-04	2021-03-04
Q14677	Q14677	6	6	6	Clathrin interactor 1	CLINT1		1	6	6	6	4	5	5	4	5	3	3	4	5	6	6	5	4	5	5	4	5	3	3	4	5	6	6	5	4	5	5	4	5	3	3	4	5	6	6	5	2021-06-13	2021-06-13
Q14683	Q14683	17	17	17	Structural maintenance of chromosomes protein 1A	SMC1A		1	17	17	17	13	15	12	12	13	15	13	11	14	15	15	14	13	15	12	12	13	15	13	11	14	15	15	14	13	15	12	12	13	15	13	11	14	15	15	14	2021-05-18	2021-05-18
Q14684	Q14684	2	2	2	Ribosomal RNA processing protein 1 homolog B	RRP1B		1	2	2	2	1	1	1	1	2	2	1	2	2	1	2	2	1	1	1	1	2	2	1	2	2	1	2	2	1	1	1	1	2	2	1	2	2	1	2	2	2021-09-02	2021-09-02
Q14690	Q14690	6	6	6	Protein RRP5 homolog	PDCD11		1	6	6	6	5	3	6	5	5	6	4	6	6	4	4	4	5	3	6	5	5	6	4	6	6	4	4	4	5	3	6	5	5	6	4	6	6	4	4	4	2021-02-04	2021-02-04
Q14694	Q14694	3	3	3	Ubiquitin carboxyl-terminal hydrolase 10	USP10		1	3	3	3	2	3	2	3	3	3	3	3	3	2	3	2	2	3	2	3	3	3	3	3	3	2	3	2	2	3	2	3	3	3	3	3	3	2	3	2	2021-05-06	2021-05-06
Q14697	Q14697	35	35	35	Neutral alpha-glucosidase AB	GANAB		1	35	35	35	30	32	28	33	33	32	31	34	30	33	33	30	30	32	28	33	33	32	31	34	30	33	33	30	30	32	28	33	33	32	31	34	30	33	33	30	53.8	53.8
Q14699	Q14699	2	2	2	Raftlin	RFTN1		1	2	2	2	2	1	1	2	2	2	2	2	2	2	2	1	2	1	1	2	2	2	2	2	2	2	2	1	2	1	1	2	2	2	2	2	2	2	2	1	2021-04-05	2021-04-05
Q14728	Q14728	2	2	2	Major facilitator superfamily domain-containing protein 10	MFSD10		1	2	2	2	2	2	2	2	2	2	1	2	1	2	2	2	2	2	2	2	2	2	1	2	1	2	2	2	2	2	2	2	2	2	1	2	1	2	2	2	2021-08-04	2021-08-04
Q14738	Q14738	2	2	2	Serine/threonine-protein phosphatase 2A 56 kDa regulatory subunit delta isoform	PPP2R5D		1	2	2	2	1	1	2	1	2	2	2	2	2	2	2	2	1	1	2	1	2	2	2	2	2	2	2	2	1	1	2	1	2	2	2	2	2	2	2	2	2021-02-04	2021-02-04
Q14739	Q14739	5	5	5	Lamin-B receptor	LBR		1	5	5	5	3	3	2	4	4	4	3	4	4	4	3	4	3	3	2	4	4	4	3	4	4	4	3	4	3	3	2	4	4	4	3	4	4	4	3	4	2021-02-13	2021-02-13
Q14764	Q14764	35	35	35	Major vault protein	MVP		1	35	35	35	22	26	25	27	26	25	22	28	25	28	27	24	22	26	25	27	26	25	22	28	25	28	27	24	22	26	25	27	26	25	22	28	25	28	27	24	49.5	49.5
Q14789	Q14789	5	5	5	Golgin subfamily B member 1	GOLGB1		1	5	5	5	2	4	3	2	2	3	2	3	2	3	3	1	2	4	3	2	2	3	2	3	2	3	3	1	2	4	3	2	2	3	2	3	2	3	3	1	2021-01-02	2021-01-02
Q14814	Q14814	3	3	2	Myocyte-specific enhancer factor 2D	MEF2D		1	3	3	2	1	2	3	2	2	3	2	3	2	2	2	2	1	2	3	2	2	3	2	3	2	2	2	2	1	1	2	1	1	2	2	2	1	1	1	1	2021-01-06	2021-01-06
Q14839;Q8TDI0;Q12873	Q14839;Q8TDI0;Q12873	4;3;2	4;3;2	4;3;2	Chromodomain-helicase-DNA-binding protein 4;Chromodomain-helicase-DNA-binding protein 5;Chromodomain-helicase-DNA-binding protein 3	CHD4;CHD5;CHD3	;;	3	4	4	4	4	3	2	3	4	3	3	2	4	4	2	2	4	3	2	3	4	3	3	2	4	4	2	2	4	3	2	3	4	3	3	2	4	4	2	2	2021-04-02	2021-04-02
Q14847	Q14847	13	13	13	LIM and SH3 domain protein 1	LASP1		1	13	13	13	11	12	13	13	13	13	12	13	13	13	13	12	11	12	13	13	13	13	12	13	13	13	13	12	11	12	13	13	13	13	12	13	13	13	13	12	46	46
Q14914	Q14914	3	3	3	Prostaglandin reductase 1	PTGR1		1	3	3	3	2	1	3	2	3	1	2	1	2	1	2	3	2	1	3	2	3	1	2	1	2	1	2	3	2	1	3	2	3	1	2	1	2	1	2	3	2021-05-12	2021-05-12
Q14956	Q14956	6	6	6	Transmembrane glycoprotein NMB	GPNMB		1	6	6	6	6	5	5	6	6	6	5	6	6	6	6	6	6	5	5	6	6	6	5	6	6	6	6	6	6	5	5	6	6	6	5	6	6	6	6	6	2021-07-11	2021-07-11
Q14964	Q14964	2	1	1	Ras-related protein Rab-39A	RAB39A		1	2	1	1	2	1	1	2	1	2	2	2	2	1	1	1	1	0	0	1	0	1	1	1	1	0	0	0	1	0	0	1	0	1	1	1	1	0	0	0	6	6
Q14966	Q14966	3	3	3	Zinc finger protein 638	ZNF638		1	3	3	3	1	3	2	2	3	1	2	2	2	3	3	2	1	3	2	2	3	1	2	2	2	3	3	2	1	3	2	2	3	1	2	2	2	3	3	2	2021-03-02	2021-03-02
Q14974	Q14974	16	16	16	Importin subunit beta-1	KPNB1		1	16	16	16	16	15	14	15	15	15	15	14	16	15	15	15	16	15	14	15	15	15	15	14	16	15	15	15	16	15	14	15	15	15	15	14	16	15	15	15	20	20
Q14978	Q14978	2	2	2	Nucleolar and coiled-body phosphoprotein 1	NOLC1		1	2	2	2	2	2	1	2	2	1	0	0	1	1	2	1	2	2	1	2	2	1	0	0	1	1	2	1	2	2	1	2	2	1	0	0	1	1	2	1	2021-03-02	2021-03-02
Q14980	Q14980	31	31	31	Nuclear mitotic apparatus protein 1	NUMA1		1	31	31	31	18	22	22	26	24	27	10	14	23	24	27	24	18	22	22	26	24	27	10	14	23	24	27	24	18	22	22	26	24	27	10	14	23	24	27	24	2021-05-22	2021-05-22
Q14C86	Q14C86	2	2	2	GTPase-activating protein and VPS9 domain-containing protein 1	GAPVD1		1	2	2	2	0	1	0	2	2	2	0	2	2	1	1	1	0	1	0	2	2	2	0	2	2	1	1	1	0	1	0	2	2	2	0	2	2	1	1	1	2	2
Q15005	Q15005	2	2	2	Signal peptidase complex subunit 2	SPCS2		1	2	2	2	1	1	2	2	2	2	1	1	2	2	1	2	1	1	2	2	2	2	1	1	2	2	1	2	1	1	2	2	2	2	1	1	2	2	1	2	2021-07-13	2021-07-13
Q15006	Q15006	4	4	4	ER membrane protein complex subunit 2	EMC2		1	4	4	4	2	2	2	3	2	3	1	3	3	3	2	1	2	2	2	3	2	3	1	3	3	3	2	1	2	2	2	3	2	3	1	3	3	3	2	1	2021-05-18	2021-05-18
Q15007	Q15007	5	5	5	Pre-mRNA-splicing regulator WTAP	WTAP		1	5	5	5	4	2	5	3	3	4	3	3	4	3	3	3	4	2	5	3	3	4	3	3	4	3	3	3	4	2	5	3	3	4	3	3	4	3	3	3	2021-02-15	2021-02-15
Q15008	Q15008	5	5	5	26S proteasome non-ATPase regulatory subunit 6	PSMD6		1	5	5	5	5	5	5	4	5	5	5	5	5	4	4	5	5	5	5	4	5	5	5	5	5	4	4	5	5	5	5	4	5	5	5	5	5	4	4	5	2021-03-18	2021-03-18
Q15018	Q15018	3	3	3	BRISC complex subunit Abro1	FAM175B		1	3	3	3	1	1	3	2	1	2	0	1	0	3	2	2	1	1	3	2	1	2	0	1	0	3	2	2	1	1	3	2	1	2	0	1	0	3	2	2	2021-09-09	2021-09-09
Q15019	Q15019	9	9	9	Septin-2	2002-09-01		1	9	9	9	6	7	8	9	8	6	8	9	9	8	8	8	6	7	8	9	8	6	8	9	9	8	8	8	6	7	8	9	8	6	8	9	9	8	8	8	38.2	38.2
Q15020	Q15020	8	8	8	Squamous cell carcinoma antigen recognized by T-cells 3	SART3		1	8	8	8	5	6	6	6	6	6	3	6	4	7	6	4	5	6	6	6	6	6	3	6	4	7	6	4	5	6	6	6	6	6	3	6	4	7	6	4	2021-06-11	2021-06-11
Q15024	Q15024	1	1	1	Exosome complex component RRP42	EXOSC7		1	1	1	1	0	0	1	0	1	1	1	0	1	0	0	0	0	0	1	0	1	1	1	0	1	0	0	0	0	0	1	0	1	1	1	0	1	0	0	0	2021-02-05	2021-02-05
Q15027	Q15027	1	1	1	Arf-GAP with coiled-coil, ANK repeat and PH domain-containing protein 1	ACAP1		1	1	1	1	1	1	1	1	1	1	1	1	1	1	1	1	1	1	1	1	1	1	1	1	1	1	1	1	1	1	1	1	1	1	1	1	1	1	1	1	2021-02-02	2021-02-02
Q15029	Q15029	16	15	15	116 kDa U5 small nuclear ribonucleoprotein component	EFTUD2		1	16	15	15	15	13	14	14	14	14	14	16	14	15	14	12	14	12	13	13	13	13	13	15	13	14	13	11	14	12	13	13	13	13	13	15	13	14	13	11	2021-09-22	2021-09-21
Q15042	Q15042	3	3	3	Rab3 GTPase-activating protein catalytic subunit	RAB3GAP1		1	3	3	3	2	1	2	2	2	2	1	2	3	2	2	2	2	1	2	2	2	2	1	2	3	2	2	2	2	1	2	2	2	2	1	2	3	2	2	2	2021-09-04	2021-09-04
Q15043	Q15043	2	2	2	Zinc transporter ZIP14	SLC39A14		1	2	2	2	1	1	2	1	1	0	0	1	1	0	1	1	1	1	2	1	1	0	0	1	1	0	1	1	1	1	2	1	1	0	0	1	1	0	1	1	2021-07-06	2021-07-06
Q15046	Q15046	18	18	18	Lysine--tRNA ligase	KARS		1	18	18	18	13	15	15	15	17	14	11	16	16	15	15	16	13	15	15	15	17	14	11	16	16	15	15	16	13	15	15	15	17	14	11	16	16	15	15	16	2021-08-26	2021-08-26
Q15050	Q15050	2	2	2	Ribosome biogenesis regulatory protein homolog	RRS1		1	2	2	2	1	2	1	2	1	2	2	2	2	2	2	1	1	2	1	2	1	2	2	2	2	2	2	1	1	2	1	2	1	2	2	2	2	2	2	1	2021-08-06	2021-08-06
Q15052	Q15052	4	2	2	Rho guanine nucleotide exchange factor 6	ARHGEF6		1	4	2	2	2	4	4	4	3	2	2	3	4	3	4	3	1	2	2	2	2	1	2	2	2	2	2	2	1	2	2	2	2	1	2	2	2	2	2	2	2021-01-06	2021-03-04
Q15056	Q15056	6	6	6	Eukaryotic translation initiation factor 4H	EIF4H		1	6	6	6	4	3	5	3	4	5	3	5	4	5	4	3	4	3	5	3	4	5	3	5	4	5	4	3	4	3	5	3	4	5	3	5	4	5	4	3	31	31
Q15061	Q15061	3	3	3	WD repeat-containing protein 43	WDR43		1	3	3	3	1	2	2	3	3	2	1	3	2	3	2	2	1	2	2	3	3	2	1	3	2	3	2	2	1	2	2	3	3	2	1	3	2	3	2	2	2021-01-08	2021-01-08
Q15067	Q15067	4	4	4	Peroxisomal acyl-coenzyme A oxidase 1	ACOX1		1	4	4	4	4	3	4	4	4	4	3	4	4	4	4	4	4	3	4	4	4	4	3	4	4	4	4	4	4	3	4	4	4	4	3	4	4	4	4	4	2021-03-10	2021-03-10
Q15075	Q15075	22	22	22	Early endosome antigen 1	EEA1		1	22	22	22	13	11	18	16	17	16	10	16	17	17	19	12	13	11	18	16	17	16	10	16	17	17	19	12	13	11	18	16	17	16	10	16	17	17	19	12	2021-07-21	2021-07-21
Q15080	Q15080	5	5	5	Neutrophil cytosol factor 4	NCF4		1	5	5	5	4	3	3	3	4	3	5	4	4	3	3	3	4	3	3	3	4	3	5	4	4	3	3	3	4	3	3	3	4	3	5	4	4	3	3	3	2021-04-17	2021-04-17
Q15084	Q15084	22	22	22	Protein disulfide-isomerase A6	PDIA6		1	22	22	22	22	20	20	22	19	22	21	22	21	22	21	22	22	20	20	22	19	22	21	22	21	22	21	22	22	20	20	22	19	22	21	22	21	22	21	22	56.1	56.1
Q15102	Q15102	4	4	4	Platelet-activating factor acetylhydrolase IB subunit gamma	PAFAH1B3		1	4	4	4	3	3	3	4	3	3	1	3	3	4	4	3	3	3	3	4	3	3	1	3	3	4	4	3	3	3	3	4	3	3	1	3	3	4	4	3	2021-07-30	2021-07-30
Q15121	Q15121	3	3	3	Astrocytic phosphoprotein PEA-15	PEA15		1	3	3	3	3	3	3	3	3	3	3	3	3	3	3	3	3	3	3	3	3	3	3	3	3	3	3	3	3	3	3	3	3	3	3	3	3	3	3	3	2021-02-19	2021-02-19
Q15125	Q15125	1	1	1	3-beta-hydroxysteroid-Delta(8),Delta(7)-isomerase	EBP		1	1	1	1	1	0	1	1	1	1	1	1	1	1	1	0	1	0	1	1	1	1	1	1	1	1	1	0	1	0	1	1	1	1	1	1	1	1	1	0	7	7
Q15126	Q15126	2	2	2	Phosphomevalonate kinase	PMVK		1	2	2	2	2	2	1	2	2	2	2	2	2	2	2	2	2	2	1	2	2	2	2	2	2	2	2	2	2	2	1	2	2	2	2	2	2	2	2	2	2021-09-10	2021-09-10
Q15149	Q15149	175	175	168	Plectin	PLEC		1	175	175	168	147	134	136	141	161	164	144	159	155	140	134	137	147	134	136	141	161	164	144	159	155	140	134	137	141	128	130	135	154	157	137	152	149	134	129	132	47.3	47.3
Q15154	Q15154	15	15	15	Pericentriolar material 1 protein	PCM1		1	15	15	15	10	12	11	10	13	13	7	11	12	12	12	13	10	12	11	10	13	13	7	11	12	12	12	13	10	12	11	10	13	13	7	11	12	12	12	13	10	10
Q15155;P69849;Q5JPE7	Q15155;P69849;Q5JPE7	10;9;9	10;9;9	10;9;9	Nodal modulator 1;Nodal modulator 3;Nodal modulator 2	NOMO1;NOMO3;NOMO2	;;	3	10	10	10	8	10	7	10	8	10	5	7	9	7	10	8	8	10	7	10	8	10	5	7	9	7	10	8	8	10	7	10	8	10	5	7	9	7	10	8	2021-06-11	2021-06-11
Q15181	Q15181	11	11	11	Inorganic pyrophosphatase	PPA1		1	11	11	11	4	8	8	6	7	8	7	9	8	10	9	8	4	8	8	6	7	8	7	9	8	10	9	8	4	8	8	6	7	8	7	9	8	10	9	8	64	64
Q15185	Q15185	5	5	5	Prostaglandin E synthase 3	PTGES3		1	5	5	5	4	4	4	5	4	4	4	4	4	4	5	4	4	4	4	5	4	4	4	4	4	4	5	4	4	4	4	5	4	4	4	4	4	4	5	4	2021-04-29	2021-04-29
Q15233	Q15233	20	19	19	Non-POU domain-containing octamer-binding protein	NONO		1	20	19	19	14	17	19	20	18	19	14	19	19	18	19	18	14	16	18	19	18	19	13	18	18	17	18	17	14	16	18	19	18	19	13	18	18	17	18	17	45.4	43.7
Q15257	Q15257	2	2	2	Serine/threonine-protein phosphatase 2A activator	PPP2R4		1	2	2	2	1	1	0	1	1	2	1	1	1	1	2	1	1	1	0	1	1	2	1	1	1	1	2	1	1	1	0	1	1	2	1	1	1	1	2	1	2021-05-14	2021-05-14
Q15269	Q15269	2	2	2	Periodic tryptophan protein 2 homolog	PWP2		1	2	2	2	0	0	1	1	1	1	0	1	1	0	0	1	0	0	1	1	1	1	0	1	1	0	0	1	0	0	1	1	1	1	0	1	1	0	0	1	2021-05-04	2021-05-04
Q15287	Q15287	2	2	2	RNA-binding protein with serine-rich domain 1	RNPS1		1	2	2	2	1	2	2	2	2	2	1	2	2	2	2	2	1	2	2	2	2	2	1	2	2	2	2	2	1	2	2	2	2	2	1	2	2	2	2	2	2021-02-10	2021-02-10
Q15293	Q15293	4	4	4	Reticulocalbin-1	RCN1		1	4	4	4	3	3	3	3	3	4	2	4	4	4	3	3	3	3	3	3	3	4	2	4	4	4	3	3	3	3	3	3	3	4	2	4	4	4	3	3	2021-01-15	2021-01-15
Q15363	Q15363	1	1	1	Transmembrane emp24 domain-containing protein 2	TMED2		1	1	1	1	1	1	1	1	1	1	0	1	1	1	1	1	1	1	1	1	1	1	0	1	1	1	1	1	1	1	1	1	1	1	0	1	1	1	1	1	2021-05-04	2021-05-04
Q15365;P57723	Q15365	15;1	15;1	11;0	Poly(rC)-binding protein 1	PCBP1		2	15	15	11	14	14	13	15	14	14	13	14	14	14	14	14	14	14	13	15	14	14	13	14	14	14	14	14	10	10	9	11	10	10	9	10	10	10	10	10	75.6	75.6
Q15366;P57721	Q15366	12;5	8;1	8;1	Poly(rC)-binding protein 2	PCBP2		2	12	8	8	12	11	11	11	11	11	11	12	12	12	11	12	8	7	7	7	7	7	7	8	8	8	7	8	8	7	7	7	7	7	7	8	8	8	7	8	49.9	37.5
Q15369	Q15369	6	6	6	Transcription elongation factor B polypeptide 1	TCEB1		1	6	6	6	4	5	6	6	4	6	4	5	5	6	5	4	4	5	6	6	4	6	4	5	5	6	5	4	4	5	6	6	4	6	4	5	5	6	5	4	40.2	40.2
Q15370	Q15370	4	4	4	Transcription elongation factor B polypeptide 2	TCEB2		1	4	4	4	2	2	1	2	3	2	1	3	3	3	4	2	2	2	1	2	3	2	1	3	3	3	4	2	2	2	1	2	3	2	1	3	3	3	4	2	70.3	70.3
Q15382	Q15382	1	1	1	GTP-binding protein Rheb	RHEB		1	1	1	1	1	1	1	1	1	1	1	1	1	0	1	1	1	1	1	1	1	1	1	1	1	0	1	1	1	1	1	1	1	1	1	1	1	0	1	1	2021-07-08	2021-07-08
Q15386	Q15386	1	1	1	Ubiquitin-protein ligase E3C	UBE3C		1	1	1	1	0	1	0	1	1	1	0	1	1	1	1	1	0	1	0	1	1	1	0	1	1	1	1	1	0	1	0	1	1	1	0	1	1	1	1	1	2021-06-01	2021-06-01
Q15388	Q15388	1	1	1	Mitochondrial import receptor subunit TOM20 homolog	TOMM20		1	1	1	1	0	1	1	1	1	1	0	1	1	1	1	1	0	1	1	1	1	1	0	1	1	1	1	1	0	1	1	1	1	1	0	1	1	1	1	1	9	9
Q15392	Q15392	2	2	2	Delta(24)-sterol reductase	DHCR24		1	2	2	2	1	1	1	1	2	2	1	2	1	2	2	1	1	1	1	1	2	2	1	2	1	2	2	1	1	1	1	1	2	2	1	2	1	2	2	1	2021-02-05	2021-02-05
Q15393	Q15393	17	17	17	Splicing factor 3B subunit 3	SF3B3		1	17	17	17	15	15	14	15	16	15	11	16	15	16	17	14	15	15	14	15	16	15	11	16	15	16	17	14	15	15	14	15	16	15	11	16	15	16	17	14	2021-01-20	2021-01-20
Q15397	Q15397	2	2	2	Pumilio domain-containing protein KIAA0020	KIAA0020		1	2	2	2	1	2	1	1	0	1	1	1	1	2	2	2	1	2	1	1	0	1	1	1	1	2	2	2	1	2	1	1	0	1	1	1	1	2	2	2	2021-01-05	2021-01-05
Q15404	Q15404	10	10	10	Ras suppressor protein 1	RSU1		1	10	10	10	8	8	7	8	7	9	8	8	9	7	7	8	8	8	7	8	7	9	8	8	9	7	7	8	8	8	7	8	7	9	8	8	9	7	7	8	40.8	40.8
Q15418	Q15418	9	9	8	Ribosomal protein S6 kinase alpha-1	RPS6KA1		1	9	9	8	4	6	6	5	8	6	5	5	4	9	6	6	4	6	6	5	8	6	5	5	4	9	6	6	4	5	6	5	7	5	4	5	4	8	6	6	2021-08-20	2021-08-20
Q15424;Q14151	Q15424	5;1	5;1	5;1	Scaffold attachment factor B1	SAFB		2	5	5	5	5	5	3	5	5	5	3	4	5	5	5	5	5	5	3	5	5	5	3	4	5	5	5	5	5	5	3	5	5	5	3	4	5	5	5	5	2021-06-11	2021-06-11
Q15427	Q15427	3	3	3	Splicing factor 3B subunit 4	SF3B4		1	3	3	3	2	2	1	3	2	2	1	2	1	2	3	1	2	2	1	3	2	2	1	2	1	2	3	1	2	2	1	3	2	2	1	2	1	2	3	1	2021-06-10	2021-06-10
Q15428	Q15428	5	5	5	Splicing factor 3A subunit 2	SF3A2		1	5	5	5	3	4	5	4	4	5	4	4	4	5	4	4	3	4	5	4	4	5	4	4	4	5	4	4	3	4	5	4	4	5	4	4	4	5	4	4	2021-07-14	2021-07-14
Q15435	Q15435	11	11	11	Protein phosphatase 1 regulatory subunit 7	PPP1R7		1	11	11	11	7	8	10	10	8	10	7	10	9	9	10	11	7	8	10	10	8	10	7	10	9	9	10	11	7	8	10	10	8	10	7	10	9	9	10	11	36.9	36.9
Q15437	Q15437	11	11	11	Protein transport protein Sec23B	SEC23B		1	11	11	11	7	8	6	7	9	9	8	8	8	9	8	9	7	8	6	7	9	9	8	8	8	9	8	9	7	8	6	7	9	9	8	8	8	9	8	9	2021-07-25	2021-07-25
Q15459	Q15459	12	12	12	Splicing factor 3A subunit 1	SF3A1		1	12	12	12	10	12	10	12	11	11	8	11	10	12	12	11	10	12	10	12	11	11	8	11	10	12	12	11	10	12	10	12	11	11	8	11	10	12	12	11	2021-02-21	2021-02-21
Q15582	Q15582	7	7	7	Transforming growth factor-beta-induced protein ig-h3	TGFBI		1	7	7	7	7	5	5	7	6	7	7	6	6	6	5	6	7	5	5	7	6	7	7	6	6	6	5	6	7	5	5	7	6	7	7	6	6	6	5	6	16	16
Q15631	Q15631	4	4	4	Translin	TSN		1	4	4	4	3	4	2	3	3	4	2	3	3	4	3	4	3	4	2	3	3	4	2	3	3	4	3	4	3	4	2	3	3	4	2	3	3	4	3	4	2021-03-30	2021-03-30
Q15637	Q15637	11	11	11	Splicing factor 1	SF1		1	11	11	11	6	7	8	11	10	11	3	9	9	10	8	8	6	7	8	11	10	11	3	9	9	10	8	8	6	7	8	11	10	11	3	9	9	10	8	8	2021-08-21	2021-08-21
Q15642	Q15642	1	1	1	Cdc42-interacting protein 4	TRIP10		1	1	1	1	1	1	1	1	1	1	1	1	1	1	1	1	1	1	1	1	1	1	1	1	1	1	1	1	1	1	1	1	1	1	1	1	1	1	1	1	2021-05-03	2021-05-03
Q15643	Q15643	3	3	3	Thyroid receptor-interacting protein 11	TRIP11		1	3	3	3	1	3	0	2	1	1	1	1	1	1	2	1	1	3	0	2	1	1	1	1	1	1	2	1	1	3	0	2	1	1	1	1	1	1	2	1	2021-01-02	2021-01-02
Q15645	Q15645	2	2	2	Pachytene checkpoint protein 2 homolog	TRIP13		1	2	2	2	2	2	2	2	2	2	2	2	1	2	2	2	2	2	2	2	2	2	2	2	1	2	2	2	2	2	2	2	2	2	2	2	1	2	2	2	2021-06-05	2021-06-05
Q15691	Q15691	11	11	11	Microtubule-associated protein RP/EB family member 1	MAPRE1		1	11	11	11	9	10	6	10	10	10	9	11	11	10	10	10	9	10	6	10	10	10	9	11	11	10	10	10	9	10	6	10	10	10	9	11	11	10	10	10	61.6	61.6
Q15714	Q15714	1	1	1	TSC22 domain family protein 1	TSC22D1		1	1	1	1	0	0	1	1	1	1	0	0	1	1	1	0	0	0	1	1	1	1	0	0	1	1	1	0	0	0	1	1	1	1	0	0	1	1	1	0	2021-01-01	2021-01-01
Q15717	Q15717	15	15	15	ELAV-like protein 1	ELAVL1		1	15	15	15	12	15	13	14	14	14	14	14	14	13	13	15	12	15	13	14	14	14	14	14	14	13	13	15	12	15	13	14	14	14	14	14	14	13	13	15	39.9	39.9
Q15738	Q15738	3	3	3	Sterol-4-alpha-carboxylate 3-dehydrogenase, decarboxylating	NSDHL		1	3	3	3	1	3	2	3	3	3	2	3	3	3	3	2	1	3	2	3	3	3	2	3	3	3	3	2	1	3	2	3	3	3	2	3	3	3	3	2	2021-03-12	2021-03-12
Q15750	Q15750	4	4	4	TGF-beta-activated kinase 1 and MAP3K7-binding protein 1	TAB1		1	4	4	4	4	2	3	3	3	2	0	2	3	3	2	2	4	2	3	3	3	2	0	2	3	3	2	2	4	2	3	3	3	2	0	2	3	3	2	2	2021-07-17	2021-07-17
Q15758	Q15758	1	1	1	Neutral amino acid transporter B(0)	SLC1A5		1	1	1	1	1	1	1	1	1	1	0	1	1	1	1	1	1	1	1	1	1	1	0	1	1	1	1	1	1	1	1	1	1	1	0	1	1	1	1	1	2021-07-03	2021-07-03
Q15785	Q15785	4	4	4	Mitochondrial import receptor subunit TOM34	TOMM34		1	4	4	4	2	4	4	4	4	4	4	4	4	4	4	4	2	4	4	4	4	4	4	4	4	4	4	4	2	4	4	4	4	4	4	4	4	4	4	4	22	22
Q15813	Q15813	4	4	4	Tubulin-specific chaperone E	TBCE		1	4	4	4	3	4	2	4	4	4	3	4	4	4	4	3	3	4	2	4	4	4	3	4	4	4	4	3	3	4	2	4	4	4	3	4	4	4	4	3	2021-09-09	2021-09-09
Q15819	Q15819	5	5	3	Ubiquitin-conjugating enzyme E2 variant 2	UBE2V2		1	5	5	3	5	5	4	5	4	4	4	4	5	4	5	5	5	5	4	5	4	4	4	4	5	4	5	5	3	3	3	3	2	2	2	2	3	2	3	3	34.5	34.5
Q15833	Q15833	14	14	14	Syntaxin-binding protein 2	STXBP2		1	14	14	14	9	10	10	13	13	11	11	13	13	13	11	9	9	10	10	13	13	11	11	13	13	13	11	9	9	10	10	13	13	11	11	13	13	13	11	9	28	28
Q15836;P63027	Q15836	3;1	3;1	3;1	Vesicle-associated membrane protein 3	VAMP3		2	3	3	3	2	2	2	1	1	2	3	2	2	2	2	3	2	2	2	1	1	2	3	2	2	2	2	3	2	2	2	1	1	2	3	2	2	2	2	3	41	41
Q15843	Q15843	4	4	4	NEDD8	NEDD8		1	4	4	4	4	4	4	4	4	4	4	4	4	4	4	4	4	4	4	4	4	4	4	4	4	4	4	4	4	4	4	4	4	4	4	4	4	4	4	4	55.6	55.6
Q15904	Q15904	3	3	3	V-type proton ATPase subunit S1	ATP6AP1		1	3	3	3	3	3	1	3	3	3	2	3	3	3	3	2	3	3	1	3	3	3	2	3	3	3	3	2	3	3	1	3	3	3	2	3	3	3	3	2	2021-05-11	2021-05-11
Q15907;P62491;P57735	Q15907;P62491	10;8;1	10;8;1	10;8;1	Ras-related protein Rab-11B;Ras-related protein Rab-11A	RAB11B;RAB11A	;	3	10	10	10	8	10	8	9	9	9	9	9	8	9	9	9	8	10	8	9	9	9	9	9	8	9	9	9	8	10	8	9	9	9	9	9	8	9	9	9	48.2	48.2
Q15942	Q15942	13	13	13	Zyxin	ZYX		1	13	13	13	11	13	11	13	12	12	11	13	12	13	13	12	11	13	11	13	12	12	11	13	12	13	13	12	11	13	11	13	12	12	11	13	12	13	13	12	37.4	37.4
Q16181;Q6ZU15	Q16181	7;1	7;1	7;1	Septin-7	2007-09-01		2	7	7	7	4	6	5	6	6	5	5	5	5	7	7	5	4	6	5	6	6	5	5	5	5	7	7	5	4	6	5	6	6	5	5	5	5	7	7	5	2021-02-25	2021-02-25
Q16186	Q16186	3	3	3	Proteasomal ubiquitin receptor ADRM1	ADRM1		1	3	3	3	3	2	3	2	2	3	3	3	2	3	2	2	3	2	3	2	2	3	3	3	2	3	2	2	3	2	3	2	2	3	3	3	2	3	2	2	2021-05-12	2021-05-12
Q16204	Q16204	4	4	4	Coiled-coil domain-containing protein 6	CCDC6		1	4	4	4	4	3	3	4	4	3	2	3	2	4	4	4	4	3	3	4	4	3	2	3	2	4	4	4	4	3	3	4	4	3	2	3	2	4	4	4	2021-06-11	2021-06-11
Q16512	Q16512	5	5	5	Serine/threonine-protein kinase N1	PKN1		1	5	5	5	4	4	3	4	3	3	2	3	3	3	4	4	4	4	3	4	3	3	2	3	3	3	4	4	4	4	3	4	3	3	2	3	3	3	4	4	2021-02-06	2021-02-06
Q16531	Q16531	17	17	17	DNA damage-binding protein 1	DDB1		1	17	17	17	11	14	12	12	11	14	11	11	12	10	14	14	11	14	12	12	11	14	11	11	12	10	14	14	11	14	12	12	11	14	11	11	12	10	14	14	2021-04-20	2021-04-20
Q16537;Q13362	Q16537	3;1	3;1	3;1	Serine/threonine-protein phosphatase 2A 56 kDa regulatory subunit epsilon isoform	PPP2R5E		2	3	3	3	2	2	1	2	2	2	2	2	3	2	2	2	2	2	1	2	2	2	2	2	3	2	2	2	2	2	1	2	2	2	2	2	3	2	2	2	2021-04-09	2021-04-09
Q16539	Q16539	5	5	5	Mitogen-activated protein kinase 14	MAPK14		1	5	5	5	5	5	3	4	5	5	5	5	5	5	3	4	5	5	3	4	5	5	5	5	5	5	3	4	5	5	3	4	5	5	5	5	5	5	3	4	2021-08-22	2021-08-22
Q16540	Q16540	3	3	3	39S ribosomal protein L23, mitochondrial	MRPL23		1	3	3	3	2	3	2	2	3	2	2	2	2	2	2	2	2	3	2	2	3	2	2	2	2	2	2	2	2	3	2	2	3	2	2	2	2	2	2	2	2021-06-17	2021-06-17
Q16543	Q16543	10	10	10	Hsp90 co-chaperone Cdc37;Hsp90 co-chaperone Cdc37, N-terminally processed	CDC37		1	10	10	10	10	8	10	10	10	9	7	10	10	9	10	10	10	8	10	10	10	9	7	10	10	9	10	10	10	8	10	10	10	9	7	10	10	9	10	10	36.5	36.5
Q16555;Q14194;Q14195	Q16555	21;2;1	21;2;1	21;2;1	Dihydropyrimidinase-related protein 2	DPYSL2		3	21	21	21	16	18	16	19	18	20	17	20	20	20	21	19	16	18	16	19	18	20	17	20	20	20	21	19	16	18	16	19	18	20	17	20	20	20	21	19	57.9	57.9
Q16563	Q16563	1	1	1	Synaptophysin-like protein 1	SYPL1		1	1	1	1	0	0	0	0	0	0	1	0	0	0	0	0	0	0	0	0	0	0	1	0	0	0	0	0	0	0	0	0	0	0	1	0	0	0	0	0	2021-02-04	2021-02-04
Q16576	Q16576	13	13	8	Histone-binding protein RBBP7	RBBP7		1	13	13	8	9	11	10	11	11	11	9	11	12	12	13	11	9	11	10	11	11	11	9	11	12	12	13	11	6	8	6	7	7	7	5	7	8	8	8	7	43.5	43.5
Q16610	Q16610	3	3	3	Extracellular matrix protein 1	ECM1		1	3	3	3	3	2	2	2	2	3	3	3	2	2	2	3	3	2	2	2	2	3	3	3	2	2	2	3	3	2	2	2	2	3	3	3	2	2	2	3	2021-06-09	2021-06-09
Q16611	Q16611	1	1	1	Bcl-2 homologous antagonist/killer	BAK1		1	1	1	1	1	1	1	1	1	1	1	1	1	1	1	1	1	1	1	1	1	1	1	1	1	1	1	1	1	1	1	1	1	1	1	1	1	1	1	1	2021-02-05	2021-02-05
Q16629	Q16629	4	4	4	Serine/arginine-rich splicing factor 7	SRSF7		1	4	4	4	4	4	4	4	4	4	4	4	4	4	4	4	4	4	4	4	4	4	4	4	4	4	4	4	4	4	4	4	4	4	4	4	4	4	4	4	2021-05-15	2021-05-15
Q16630	Q16630	4	4	4	Cleavage and polyadenylation specificity factor subunit 6	CPSF6		1	4	4	4	2	4	2	4	2	2	2	2	3	2	3	3	2	4	2	4	2	2	2	2	3	2	3	3	2	4	2	4	2	2	2	2	3	2	3	3	2021-07-12	2021-07-12
Q16643	Q16643	4	4	4	Drebrin	DBN1		1	4	4	4	2	3	3	2	3	3	2	3	3	3	3	3	2	3	3	2	3	3	2	3	3	3	3	3	2	3	3	2	3	3	2	3	3	3	3	3	10	10
Q16658	Q16658	21	21	21	Fascin	FSCN1		1	21	21	21	17	18	18	19	19	19	16	21	18	19	20	18	17	18	18	19	19	19	16	21	18	19	20	18	17	18	18	19	19	19	16	21	18	19	20	18	47.7	47.7
Q16666;Q6K0P9	Q16666	9;1	9;1	9;1	Gamma-interferon-inducible protein 16	IFI16		2	9	9	9	7	6	5	9	6	7	6	8	7	8	9	5	7	6	5	9	6	7	6	8	7	8	9	5	7	6	5	9	6	7	6	8	7	8	9	5	2021-09-13	2021-09-13
Q16698	Q16698	16	16	16	2,4-dienoyl-CoA reductase, mitochondrial	DECR1		1	16	16	16	16	15	16	16	15	15	14	15	16	14	14	15	16	15	16	16	15	15	14	15	16	14	14	15	16	15	16	16	15	15	14	15	16	14	14	15	48.1	48.1
Q16706	Q16706	2	2	2	Alpha-mannosidase 2	MAN2A1		1	2	2	2	2	2	1	2	2	1	1	1	1	2	2	1	2	2	1	2	2	1	1	1	1	2	2	1	2	2	1	2	2	1	1	1	1	2	2	1	2021-06-03	2021-06-03
Q16718	Q16718	7	7	7	NADH dehydrogenase [ubiquinone] 1 alpha subcomplex subunit 5	NDUFA5		1	7	7	7	4	6	5	7	5	6	5	6	7	6	7	7	4	6	5	7	5	6	5	6	7	6	7	7	4	6	5	7	5	6	5	6	7	6	7	7	69.8	69.8
Q16719	Q16719	9	9	9	Kynureninase	KYNU		1	9	9	9	9	6	5	7	9	8	8	9	9	7	9	5	9	6	5	7	9	8	8	9	9	7	9	5	9	6	5	7	9	8	8	9	9	7	9	5	32.5	32.5
Q16740	Q16740	3	3	3	ATP-dependent Clp protease proteolytic subunit, mitochondrial	CLPP		1	3	3	3	3	3	3	3	2	3	1	3	2	3	3	3	3	3	3	3	2	3	1	3	2	3	3	3	3	3	3	3	2	3	1	3	2	3	3	3	2021-06-20	2021-06-20
Q16762	Q16762	5	5	5	Thiosulfate sulfurtransferase	TST		1	5	5	5	3	4	4	5	5	5	2	4	5	5	5	4	3	4	4	5	5	5	2	4	5	5	5	4	3	4	4	5	5	5	2	4	5	5	5	4	2021-09-22	2021-09-22
Q16774	Q16774	6	6	6	Guanylate kinase	GUK1		1	6	6	6	4	4	5	5	4	5	5	4	4	4	3	4	4	4	5	5	4	5	5	4	4	4	3	4	4	4	5	5	4	5	5	4	4	4	3	4	45.7	45.7
Q16775	Q16775	5	5	5	Hydroxyacylglutathione hydrolase, mitochondrial	HAGH		1	5	5	5	5	5	5	5	4	5	3	5	5	5	5	4	5	5	5	5	4	5	3	5	5	5	5	4	5	5	5	5	4	5	3	5	5	5	5	4	2021-06-16	2021-06-16
Q16777;Q6FI13	Q16777;Q6FI13	7;7	7;7	1;1	Histone H2A type 2-C;Histone H2A type 2-A	HIST2H2AC;HIST2H2AA3	;	2	7	7	1	7	7	7	7	7	7	7	7	7	7	7	7	7	7	7	7	7	7	7	7	7	7	7	7	1	1	1	1	1	1	1	1	1	1	1	1	58.1	58.1
Q16795	Q16795	11	11	11	NADH dehydrogenase [ubiquinone] 1 alpha subcomplex subunit 9, mitochondrial	NDUFA9		1	11	11	11	8	9	6	10	8	8	9	8	7	9	10	8	8	9	6	10	8	8	9	8	7	9	10	8	8	9	6	10	8	8	9	8	7	9	10	8	37.9	37.9
Q16799	Q16799	3	3	3	Reticulon-1	RTN1		1	3	3	3	2	1	1	2	3	3	3	3	2	1	1	1	2	1	1	2	3	3	3	3	2	1	1	1	2	1	1	2	3	3	3	3	2	1	1	1	2021-04-08	2021-04-08
Q16822;P35558	Q16822	14;1	14;1	14;1	Phosphoenolpyruvate carboxykinase [GTP], mitochondrial	PCK2		2	14	14	14	11	11	11	11	11	12	10	12	12	12	10	10	11	11	11	11	11	12	10	12	12	12	10	10	11	11	11	11	11	12	10	12	12	12	10	10	2021-04-28	2021-04-28
Q16827;P23467	Q16827;P23467	2;1	2;1	2;1	Receptor-type tyrosine-protein phosphatase O;Receptor-type tyrosine-protein phosphatase beta	PTPRO;PTPRB	;	2	2	2	2	1	1	1	2	2	2	2	2	2	1	0	1	1	1	1	2	2	2	2	2	2	1	0	1	1	1	1	2	2	2	2	2	2	1	0	1	2021-01-02	2021-01-02
Q16831	Q16831	1	1	1	Uridine phosphorylase 1	UPP1		1	1	1	1	0	1	1	1	1	1	0	1	1	1	0	1	0	1	1	1	1	1	0	1	1	1	0	1	0	1	1	1	1	1	0	1	1	1	0	1	2021-01-06	2021-01-06
Q16836	Q16836	14	14	14	Hydroxyacyl-coenzyme A dehydrogenase, mitochondrial	HADH		1	14	14	14	11	11	11	12	11	11	11	11	12	8	11	10	11	11	11	12	11	11	11	11	12	8	11	10	11	11	11	12	11	11	11	11	12	8	11	10	68.5	68.5
Q16851	Q16851	12	12	12	UTP--glucose-1-phosphate uridylyltransferase	UGP2		1	12	12	12	10	11	10	12	12	11	8	11	12	11	11	12	10	11	10	12	12	11	8	11	12	11	11	12	10	11	10	12	12	11	8	11	12	11	11	12	2021-07-30	2021-07-30
Q16864	Q16864	2	2	2	V-type proton ATPase subunit F	ATP6V1F		1	2	2	2	2	1	1	2	2	2	1	2	2	2	2	2	2	1	1	2	2	2	1	2	2	2	2	2	2	1	1	2	2	2	1	2	2	2	2	2	44.5	44.5
Q16873	Q16873	1	1	1	Leukotriene C4 synthase	LTC4S		1	1	1	1	1	1	1	1	1	1	1	1	1	1	1	1	1	1	1	1	1	1	1	1	1	1	1	1	1	1	1	1	1	1	1	1	1	1	1	1	2021-03-09	2021-03-09
Q16881	Q16881	13	13	12	Thioredoxin reductase 1, cytoplasmic	TXNRD1		1	13	13	12	11	11	7	11	11	11	9	11	11	10	10	10	11	11	7	11	11	11	9	11	11	10	10	10	10	10	6	10	10	10	8	10	10	9	9	9	37.1	37.1
Q16891	Q16891	32	32	32	MICOS complex subunit MIC60	IMMT		1	32	32	32	22	27	25	29	27	28	24	27	27	25	27	27	22	27	25	29	27	28	24	27	27	25	27	27	22	27	25	29	27	28	24	27	27	25	27	27	46.3	46.3
Q1KMD3	Q1KMD3	10	10	10	Heterogeneous nuclear ribonucleoprotein U-like protein 2	HNRNPUL2		1	10	10	10	8	9	8	9	9	9	7	8	8	9	8	8	8	9	8	9	9	9	7	8	8	9	8	8	8	9	8	9	9	9	7	8	8	9	8	8	2021-01-24	2021-01-24
Q27J81	Q27J81	9	9	9	Inverted formin-2	INF2		1	9	9	9	5	5	3	9	6	7	3	6	7	7	7	7	5	5	3	9	6	7	3	6	7	7	7	7	5	5	3	9	6	7	3	6	7	7	7	7	2021-02-13	2021-02-13
Q29RF7	Q29RF7	5	5	5	Sister chromatid cohesion protein PDS5 homolog A	PDS5A		1	5	5	5	4	4	3	4	4	4	3	4	2	4	4	2	4	4	3	4	4	4	3	4	2	4	4	2	4	4	3	4	4	4	3	4	2	4	4	2	2021-05-05	2021-05-05
Q2M1Z3	Q2M1Z3	1	1	1	Rho GTPase-activating protein 31	ARHGAP31		1	1	1	1	1	1	1	1	1	1	1	1	1	1	1	1	1	1	1	1	1	1	1	1	1	1	1	1	1	1	1	1	1	1	1	1	1	1	1	1	0.8	0.8
Q2M2I8	Q2M2I8	6	6	6	AP2-associated protein kinase 1	AAK1		1	6	6	6	2	4	4	3	5	4	1	4	5	5	5	6	2	4	4	3	5	4	1	4	5	5	5	6	2	4	4	3	5	4	1	4	5	5	5	6	2021-06-10	2021-06-10
Q2M389	Q2M389	2	2	2	WASH complex subunit 7	KIAA1033		1	2	2	2	2	2	2	2	2	2	2	2	2	2	1	1	2	2	2	2	2	2	2	2	2	2	1	1	2	2	2	2	2	2	2	2	2	2	1	1	2021-08-01	2021-08-01
Q2TAA2	Q2TAA2	1	1	1	Isoamyl acetate-hydrolyzing esterase 1 homolog	IAH1		1	1	1	1	0	0	1	1	1	1	0	1	1	1	1	1	0	0	1	1	1	1	0	1	1	1	1	1	0	0	1	1	1	1	0	1	1	1	1	1	2021-07-09	2021-07-09
Q2TAY7	Q2TAY7	2	2	2	WD40 repeat-containing protein SMU1;WD40 repeat-containing protein SMU1, N-terminally processed	SMU1		1	2	2	2	1	1	1	1	1	1	1	1	2	1	2	2	1	1	1	1	1	1	1	1	2	1	2	2	1	1	1	1	1	1	1	1	2	1	2	2	2021-05-04	2021-05-04
Q32MZ4;Q9Y608	Q32MZ4	11;1	11;1	11;1	Leucine-rich repeat flightless-interacting protein 1	LRRFIP1		2	11	11	11	9	10	10	8	11	10	9	9	9	10	10	9	9	10	10	8	11	10	9	9	9	10	10	9	9	10	10	8	11	10	9	9	9	10	10	9	2021-02-16	2021-02-16
Q32P28	Q32P28	14	14	14	Prolyl 3-hydroxylase 1	LEPRE1		1	14	14	14	9	12	11	12	11	12	9	12	12	13	13	10	9	12	11	12	11	12	9	12	12	13	13	10	9	12	11	12	11	12	9	12	12	13	13	10	2021-03-25	2021-03-25
Q32P44	Q32P44	3	3	3	Echinoderm microtubule-associated protein-like 3	EML3		1	3	3	3	0	2	2	2	3	3	1	2	2	3	2	2	0	2	2	2	3	3	1	2	2	3	2	2	0	2	2	2	3	3	1	2	2	3	2	2	4	4
Q3KQV9;Q16222	Q3KQV9	6;1	6;1	6;1	UDP-N-acetylhexosamine pyrophosphorylase-like protein 1	UAP1L1		2	6	6	6	4	6	5	4	6	6	5	5	5	6	6	6	4	6	5	4	6	6	5	5	5	6	6	6	4	6	5	4	6	6	5	5	5	6	6	6	2021-08-13	2021-08-13
Q3LXA3	Q3LXA3	5	5	5	Bifunctional ATP-dependent dihydroxyacetone kinase/FAD-AMP lyase (cyclizing);ATP-dependent dihydroxyacetone kinase;FAD-AMP lyase (cyclizing)	DAK		1	5	5	5	4	5	4	5	4	5	2	5	5	5	5	4	4	5	4	5	4	5	2	5	5	5	5	4	4	5	4	5	4	5	2	5	5	5	5	4	2021-05-16	2021-05-16
Q3MHD2	Q3MHD2	2	2	2	Protein LSM12 homolog	LSM12		1	2	2	2	2	2	2	2	2	2	2	2	2	2	2	2	2	2	2	2	2	2	2	2	2	2	2	2	2	2	2	2	2	2	2	2	2	2	2	2	2021-08-13	2021-08-13
Q3YEC7	Q3YEC7	2	2	2	Rab-like protein 6	RABL6		1	2	2	2	1	2	1	2	2	2	1	2	2	2	1	2	1	2	1	2	2	2	1	2	2	2	1	2	1	2	1	2	2	2	1	2	2	2	1	2	2021-01-05	2021-01-05
Q3ZCM7	Q3ZCM7	12	2	2	Tubulin beta-8 chain	TUBB8		1	12	2	2	12	12	12	12	11	12	11	11	12	11	12	12	2	2	2	2	2	2	2	2	2	2	2	2	2	2	2	2	2	2	2	2	2	2	2	2	2021-02-25	2021-04-07
Q3ZCQ8	Q3ZCQ8	4	4	4	Mitochondrial import inner membrane translocase subunit TIM50	TIMM50		1	4	4	4	4	3	4	4	4	4	3	4	4	4	4	3	4	3	4	4	4	4	3	4	4	4	4	3	4	3	4	4	4	4	3	4	4	4	4	3	15	15
Q49A26	Q49A26	3	3	3	Putative oxidoreductase GLYR1	GLYR1		1	3	3	3	3	3	3	3	3	3	2	3	2	3	3	3	3	3	3	3	3	3	2	3	2	3	3	3	3	3	3	3	3	3	2	3	2	3	3	3	2021-01-08	2021-01-08
Q4G0F5	Q4G0F5	1	1	1	Vacuolar protein sorting-associated protein 26B	VPS26B		1	1	1	1	1	1	1	1	1	0	0	1	0	1	1	0	1	1	1	1	1	0	0	1	0	1	1	0	1	1	1	1	1	0	0	1	0	1	1	0	2021-06-03	2021-06-03
Q4G0N4	Q4G0N4	5	5	5	NAD kinase 2, mitochondrial	NADK2		1	5	5	5	4	2	2	2	3	4	1	1	2	2	3	4	4	2	2	2	3	4	1	1	2	2	3	4	4	2	2	2	3	4	1	1	2	2	3	4	2021-03-16	2021-03-16
Q4G176	Q4G176	1	1	1	Acyl-CoA synthetase family member 3, mitochondrial	ACSF3		1	1	1	1	1	1	1	1	1	0	0	1	0	1	1	1	1	1	1	1	1	0	0	1	0	1	1	1	1	1	1	1	1	0	0	1	0	1	1	1	2021-05-03	2021-05-03
Q4KMQ2	Q4KMQ2	2	2	2	Anoctamin-6	ANO6		1	2	2	2	1	2	2	2	2	2	0	2	1	2	2	1	1	2	2	2	2	2	0	2	1	2	2	1	1	2	2	2	2	2	0	2	1	2	2	1	2021-07-03	2021-07-03
Q4V328	Q4V328	5	5	5	GRIP1-associated protein 1	GRIPAP1		1	5	5	5	3	2	3	4	4	3	3	5	3	4	3	4	3	2	3	4	4	3	3	5	3	4	3	4	3	2	3	4	4	3	3	5	3	4	3	4	2021-05-10	2021-05-10
Q9BRT8;Q8IUF1;Q5RIA9;Q5JTY5;Q4V339	Q9BRT8;Q8IUF1;Q5RIA9;Q5JTY5;Q4V339	2;2;2;2;2	2;2;2;2;2	2;2;2;2;2	COBW domain-containing protein 1;COBW domain-containing protein 2;COBW domain-containing protein 5;COBW domain-containing protein 3;COBW domain-containing protein 6	CBWD1;CBWD2;CBWD5;CBWD3;CBWD6	;;;;	5	2	2	2	2	1	2	2	1	2	1	2	2	2	2	2	2	1	2	2	1	2	1	2	2	2	2	2	2	1	2	2	1	2	1	2	2	2	2	2	2021-03-07	2021-03-07
Q4VC31	Q4VC31	2	2	2	Coiled-coil domain-containing protein 58	CCDC58		1	2	2	2	2	1	2	2	2	2	1	2	2	2	2	2	2	1	2	2	2	2	1	2	2	2	2	2	2	1	2	2	2	2	1	2	2	2	2	2	2021-07-25	2021-07-25
Q52LJ0	Q52LJ0	2	2	2	Protein FAM98B	FAM98B		1	2	2	2	1	2	2	2	2	2	0	2	2	2	2	1	1	2	2	2	2	2	0	2	2	2	2	1	1	2	2	2	2	2	0	2	2	2	2	1	2021-03-07	2021-03-07
Q53EL6	Q53EL6	5	5	5	Programmed cell death protein 4	PDCD4		1	5	5	5	2	4	5	4	1	1	0	5	3	4	4	5	2	4	5	4	1	1	0	5	3	4	4	5	2	4	5	4	1	1	0	5	3	4	4	5	2021-07-20	2021-07-20
Q53EP0	Q53EP0	1	1	1	Fibronectin type III domain-containing protein 3B	FNDC3B		1	1	1	1	0	0	1	1	1	1	0	1	1	1	0	0	0	0	1	1	1	1	0	1	1	1	0	0	0	0	1	1	1	1	0	1	1	1	0	0	2021-06-01	2021-06-01
Q53FA7	Q53FA7	2	2	2	Quinone oxidoreductase PIG3	TP53I3		1	2	2	2	1	1	2	0	1	1	0	1	0	1	2	1	1	1	2	0	1	1	0	1	0	1	2	1	1	1	2	0	1	1	0	1	0	1	2	1	2021-08-04	2021-08-04
Q53GL7	Q53GL7	4	4	4	Poly [ADP-ribose] polymerase 10	PARP10		1	4	4	4	1	1	2	3	1	1	1	1	2	2	1	1	1	1	2	3	1	1	1	1	2	2	1	1	1	1	2	3	1	1	1	1	2	2	1	1	2021-07-08	2021-07-08
Q53GQ0	Q53GQ0	8	8	8	Very-long-chain 3-oxoacyl-CoA reductase	HSD17B12		1	8	8	8	7	6	5	7	5	6	6	7	7	6	7	7	7	6	5	7	5	6	6	7	7	6	7	7	7	6	5	7	5	6	6	7	7	6	7	7	29.2	29.2
Q53H12	Q53H12	1	1	1	Acylglycerol kinase, mitochondrial	AGK		1	1	1	1	1	1	1	1	1	1	1	1	1	1	1	1	1	1	1	1	1	1	1	1	1	1	1	1	1	1	1	1	1	1	1	1	1	1	1	1	2021-09-05	2021-09-05
Q53H82	Q53H82	8	8	8	Beta-lactamase-like protein 2	LACTB2		1	8	8	8	7	7	6	7	6	5	4	5	5	6	6	6	7	7	6	7	6	5	4	5	5	6	6	6	7	7	6	7	6	5	4	5	5	6	6	6	39.2	39.2
Q53QZ3	Q53QZ3	1	1	1	Rho GTPase-activating protein 15	ARHGAP15		1	1	1	1	0	1	1	1	0	0	0	1	0	1	1	1	0	1	1	1	0	0	0	1	0	1	1	1	0	1	1	1	0	0	0	1	0	1	1	1	2021-02-03	2021-02-03
Q562E7	Q562E7	3	3	3	WD repeat-containing protein 81	WDR81		1	3	3	3	2	2	3	3	3	3	1	3	3	3	3	3	2	2	3	3	3	3	1	3	3	3	3	3	2	2	3	3	3	3	1	3	3	3	3	3	2021-05-03	2021-05-03
Q562R1	Q562R1	11	1	1	Beta-actin-like protein 2	ACTBL2		1	11	1	1	11	10	10	10	10	10	10	11	11	10	10	10	1	1	1	1	0	0	0	1	1	0	1	1	1	1	1	1	0	0	0	1	1	0	1	1	2021-07-27	2021-08-04
Q567U6	Q567U6	1	1	1	Coiled-coil domain-containing protein 93	CCDC93		1	1	1	1	1	1	1	1	1	1	1	1	1	1	1	1	1	1	1	1	1	1	1	1	1	1	1	1	1	1	1	1	1	1	1	1	1	1	1	1	2021-09-01	2021-09-01
Q56VL3	Q56VL3	1	1	1	OCIA domain-containing protein 2	OCIAD2		1	1	1	1	1	1	1	1	1	1	1	1	0	1	1	1	1	1	1	1	1	1	1	1	0	1	1	1	1	1	1	1	1	1	1	1	0	1	1	1	2021-04-08	2021-04-08
Q58FF6	Q58FF6	8	2	2	Putative heat shock protein HSP 90-beta 4	HSP90AB4P		1	8	2	2	4	6	7	7	5	6	6	6	7	7	6	6	1	0	1	1	0	1	1	0	1	1	0	1	1	0	1	1	0	1	1	0	1	1	0	1	2021-01-14	5
Q58FF8	Q58FF8	11	2	2	Putative heat shock protein HSP 90-beta 2	HSP90AB2P		1	11	2	2	8	9	10	10	10	11	9	10	10	10	10	10	2	2	2	2	2	2	2	2	2	2	2	2	2	2	2	2	2	2	2	2	2	2	2	2	2021-05-21	2021-05-04
Q5BJD5	Q5BJD5	1	1	1	Transmembrane protein 41B	TMEM41B		1	1	1	1	1	1	1	0	1	1	1	1	1	1	1	1	1	1	1	0	1	1	1	1	1	1	1	1	1	1	1	0	1	1	1	1	1	1	1	1	2021-05-06	2021-05-06
Q5BKZ1	Q5BKZ1	1	1	1	DBIRD complex subunit ZNF326	ZNF326		1	1	1	1	1	1	1	1	1	1	1	1	1	1	1	1	1	1	1	1	1	1	1	1	1	1	1	1	1	1	1	1	1	1	1	1	1	1	1	1	2021-07-02	2021-07-02
Q5EBM0	Q5EBM0	1	1	1	UMP-CMP kinase 2, mitochondrial	CMPK2		1	1	1	1	1	0	1	0	1	1	0	1	1	1	1	1	1	0	1	0	1	1	0	1	1	1	1	1	1	0	1	0	1	1	0	1	1	1	1	1	8	8
Q5EG05	Q5EG05	2	1	1	Caspase recruitment domain-containing protein 16	CARD16		1	2	1	1	1	2	2	1	2	2	1	2	2	1	2	2	0	1	1	0	1	1	0	1	1	0	1	1	0	1	1	0	1	1	0	1	1	0	1	1	2021-01-09	2021-06-04
Q5HYC2	Q5HYC2	2	2	2	Uncharacterized protein KIAA2026	KIAA2026		1	2	2	2	2	2	0	1	0	0	1	1	1	1	0	0	2	2	0	1	0	0	1	1	1	1	0	0	2	2	0	1	0	0	1	1	1	1	0	0	1	1
Q5HYI8	Q5HYI8	2	2	2	Rab-like protein 3	RABL3		1	2	2	2	1	1	2	2	2	2	2	2	2	2	2	2	1	1	2	2	2	2	2	2	2	2	2	2	1	1	2	2	2	2	2	2	2	2	2	2	2021-03-09	2021-03-09
Q5JRA6	Q5JRA6	2	2	2	Melanoma inhibitory activity protein 3	MIA3		1	2	2	2	1	2	1	2	2	2	1	0	1	1	2	1	1	2	1	2	2	2	1	0	1	1	2	1	1	2	1	2	2	2	1	0	1	1	2	1	2021-06-01	2021-06-01
Q5JRX3	Q5JRX3	11	11	11	Presequence protease, mitochondrial	PITRM1		1	11	11	11	7	8	5	9	9	8	6	8	7	9	9	7	7	8	5	9	9	8	6	8	7	9	9	7	7	8	5	9	9	8	6	8	7	9	9	7	2021-04-18	2021-04-18
Q5JSP0	Q5JSP0	4	4	4	FYVE, RhoGEF and PH domain-containing protein 3	FGD3		1	4	4	4	3	4	3	4	3	4	2	4	3	3	4	2	3	4	3	4	3	4	2	4	3	3	4	2	3	4	3	4	3	4	2	4	3	3	4	2	2021-05-10	2021-05-10
Q5JTH9	Q5JTH9	4	4	4	RRP12-like protein	RRP12		1	4	4	4	2	3	3	3	4	4	1	3	3	3	4	2	2	3	3	3	4	4	1	3	3	3	4	2	2	3	3	3	4	4	1	3	3	3	4	2	2021-08-04	2021-08-04
Q5JTJ3	Q5JTJ3	3	3	3	Cytochrome c oxidase assembly factor 6 homolog	COA6		1	3	3	3	0	2	3	2	3	3	3	3	1	2	2	1	0	2	3	2	3	3	3	3	1	2	2	1	0	2	3	2	3	3	3	3	1	2	2	1	33.6	33.6
Q5JTV8	Q5JTV8	11	11	11	Torsin-1A-interacting protein 1	TOR1AIP1		1	11	11	11	9	11	11	11	11	11	8	11	10	11	11	11	9	11	11	11	11	11	8	11	10	11	11	11	9	11	11	11	11	11	8	11	10	11	11	11	23	23
Q5JTZ9	Q5JTZ9	9	9	9	Alanine--tRNA ligase, mitochondrial	AARS2		1	9	9	9	6	6	4	7	7	6	4	8	5	9	8	6	6	6	4	7	7	6	4	8	5	9	8	6	6	6	4	7	7	6	4	8	5	9	8	6	2021-05-14	2021-05-14
Q5JU69	Q5JU69	2	2	2	Torsin-2A	TOR2A		1	2	2	2	2	2	1	2	2	1	2	1	2	2	2	2	2	2	1	2	2	1	2	1	2	2	2	2	2	2	1	2	2	1	2	1	2	2	2	2	9	9
Q5JVF3	Q5JVF3	2	2	2	PCI domain-containing protein 2	PCID2		1	2	2	2	1	1	2	1	1	1	0	1	0	1	1	0	1	1	2	1	1	1	0	1	0	1	1	0	1	1	2	1	1	1	0	1	0	1	1	0	7	7
Q5K4L6	Q5K4L6	1	1	1	Long-chain fatty acid transport protein 3	SLC27A3		1	1	1	1	1	1	1	1	1	1	1	1	1	1	1	1	1	1	1	1	1	1	1	1	1	1	1	1	1	1	1	1	1	1	1	1	1	1	1	1	2021-07-02	2021-07-02
Q5QJE6	Q5QJE6	1	1	1	Deoxynucleotidyltransferase terminal-interacting protein 2	DNTTIP2		1	1	1	1	1	0	0	1	0	1	0	0	1	1	0	1	1	0	0	1	0	1	0	0	1	1	0	1	1	0	0	1	0	1	0	0	1	1	0	1	2021-09-01	2021-09-01
Q5R372	Q5R372	3	3	3	Rab GTPase-activating protein 1-like	RABGAP1L		1	3	3	3	2	1	3	3	2	2	1	2	2	1	2	2	2	1	3	3	2	2	1	2	2	1	2	2	2	1	3	3	2	2	1	2	2	1	2	2	2021-01-06	2021-01-06
Q5R3I4	Q5R3I4	2	2	2	Tetratricopeptide repeat protein 38	TTC38		1	2	2	2	1	1	2	2	2	1	0	1	1	1	2	2	1	1	2	2	2	1	0	1	1	1	2	2	1	1	2	2	2	1	0	1	1	1	2	2	2021-08-05	2021-08-05
Q5RI15	Q5RI15	4	4	4	Cytochrome c oxidase protein 20 homolog	COX20		1	4	4	4	3	4	4	3	3	3	2	2	3	3	2	2	3	4	4	3	3	3	2	2	3	3	2	2	3	4	4	3	3	3	2	2	3	3	2	2	33.1	33.1
Q5RKV6	Q5RKV6	3	3	3	Exosome complex component MTR3	EXOSC6		1	3	3	3	2	1	2	2	3	2	0	3	3	3	3	3	2	1	2	2	3	2	0	3	3	3	3	3	2	1	2	2	3	2	0	3	3	3	3	3	2021-02-20	2021-02-20
Q5SNT2	Q5SNT2	1	1	1	Transmembrane protein 201	TMEM201		1	1	1	1	0	1	0	0	1	1	0	1	1	1	1	0	0	1	0	0	1	1	0	1	1	1	1	0	0	1	0	0	1	1	0	1	1	1	1	0	2021-05-01	2021-05-01
Q5SRE5	Q5SRE5	3	3	3	Nucleoporin NUP188 homolog	NUP188		1	3	3	3	2	3	3	3	2	3	3	2	3	3	3	3	2	3	3	3	2	3	3	2	3	3	3	3	2	3	3	3	2	3	3	2	3	3	3	3	2021-07-02	2021-07-02
Q5SSJ5	Q5SSJ5	9	9	9	Heterochromatin protein 1-binding protein 3	HP1BP3		1	9	9	9	6	7	7	8	8	8	7	7	7	7	9	8	6	7	7	8	8	8	7	7	7	7	9	8	6	7	7	8	8	8	7	7	7	7	9	8	2021-03-21	2021-03-21
Q5SW79;Q96L14	Q5SW79;Q96L14	3;2	3;2	3;2	Centrosomal protein of 170 kDa;Cep170-like protein	CEP170;CEP170P1	;	2	3	3	3	1	1	2	1	2	1	3	3	1	3	2	2	1	1	2	1	2	1	3	3	1	3	2	2	1	1	2	1	2	1	3	3	1	3	2	2	2	2
Q5SXH7	Q5SXH7	1	1	1	Pleckstrin homology domain-containing family S member 1	PLEKHS1		1	1	1	1	1	1	1	1	1	1	1	1	1	1	1	1	1	1	1	1	1	1	1	1	1	1	1	1	1	1	1	1	1	1	1	1	1	1	1	1	2021-02-03	2021-02-03
Q5T011	Q5T011	1	1	1	Protein SZT2	SZT2		1	1	1	1	1	1	1	1	0	1	0	1	1	1	1	1	1	1	1	1	0	1	0	1	1	1	1	1	1	1	1	1	0	1	0	1	1	1	1	1	0.6	0.6
Q5T0F9	Q5T0F9	3	3	3	Coiled-coil and C2 domain-containing protein 1B	CC2D1B		1	3	3	3	1	1	1	3	2	2	1	2	2	2	2	0	1	1	1	3	2	2	1	2	2	2	2	0	1	1	1	3	2	2	1	2	2	2	2	0	2021-02-07	2021-02-07
Q5T160	Q5T160	2	2	2	Probable arginine--tRNA ligase, mitochondrial	RARS2		1	2	2	2	0	1	0	2	1	0	1	0	1	1	1	0	0	1	0	2	1	0	1	0	1	1	1	0	0	1	0	2	1	0	1	0	1	1	1	0	5	5
Q5T1M5	Q5T1M5	9	9	9	FK506-binding protein 15	FKBP15		1	9	9	9	7	8	6	7	8	5	9	6	6	6	8	8	7	8	6	7	8	5	9	6	6	6	8	8	7	8	6	7	8	5	9	6	6	6	8	8	13	13
Q5T447	Q5T447	2	2	2	E3 ubiquitin-protein ligase HECTD3	HECTD3		1	2	2	2	0	1	1	2	1	1	0	2	2	1	1	1	0	1	1	2	1	1	0	2	2	1	1	1	0	1	1	2	1	1	0	2	2	1	1	1	2021-04-03	2021-04-03
Q5T4S7	Q5T4S7	7	7	7	E3 ubiquitin-protein ligase UBR4	UBR4		1	7	7	7	6	4	4	5	7	5	3	6	4	6	6	6	6	4	4	5	7	5	3	6	4	6	6	6	6	4	4	5	7	5	3	6	4	6	6	6	2021-09-01	2021-09-01
Q5T653	Q5T653	1	1	1	39S ribosomal protein L2, mitochondrial	MRPL2		1	1	1	1	1	1	1	1	1	1	0	1	1	1	0	0	1	1	1	1	1	1	0	1	1	1	0	0	1	1	1	1	1	1	0	1	1	1	0	0	2021-02-08	2021-02-08
Q5T848	Q5T848	1	1	1	Probable G-protein coupled receptor 158	GPR158		1	1	1	1	1	1	1	1	1	1	1	1	1	1	1	1	1	1	1	1	1	1	1	1	1	1	1	1	1	1	1	1	1	1	1	1	1	1	1	1	2021-02-01	2021-02-01
Q5T9A4	Q5T9A4	6	1	1	ATPase family AAA domain-containing protein 3B	ATAD3B		1	6	1	1	4	6	5	6	6	5	5	6	4	6	5	5	1	1	1	1	1	1	1	1	1	1	1	0	1	1	1	1	1	1	1	1	1	1	1	0	2021-01-11	2021-06-02
Q5TAQ9	Q5TAQ9	3	3	3	DDB1- and CUL4-associated factor 8	DCAF8		1	3	3	3	1	3	2	2	1	2	2	2	2	1	2	2	1	3	2	2	1	2	2	2	2	1	2	2	1	3	2	2	1	2	2	2	2	1	2	2	6	6
Q5TDH0	Q5TDH0	3	3	3	Protein DDI1 homolog 2	DDI2		1	3	3	3	1	0	1	2	1	2	1	3	3	2	2	1	1	0	1	2	1	2	1	3	3	2	2	1	1	0	1	2	1	2	1	3	3	2	2	1	2021-08-10	2021-08-10
Q5TEJ8	Q5TEJ8	4	4	4	Protein THEMIS2	THEMIS2		1	4	4	4	3	3	3	3	4	3	4	4	4	2	3	2	3	3	3	3	4	3	4	4	4	2	3	2	3	3	3	3	4	3	4	4	4	2	3	2	2021-04-12	2021-04-12
Q5TFE4	Q5TFE4	2	2	2	5-nucleotidase domain-containing protein 1	NT5DC1		1	2	2	2	0	1	0	0	1	1	0	2	1	1	1	1	0	1	0	0	1	1	0	2	1	1	1	1	0	1	0	0	1	1	0	2	1	1	1	1	2021-03-07	2021-03-07
Q5TZA2;Q8IVE0	Q5TZA2	3;1	3;1	3;1	Rootletin	CROCC		2	3	3	3	2	1	2	1	1	2	2	2	2	2	2	2	2	1	2	1	1	2	2	2	2	2	2	2	2	1	2	1	1	2	2	2	2	2	2	2	2021-04-01	2021-04-01
Q5U5X0	Q5U5X0	3	3	3	Complex III assembly factor LYRM7	LYRM7		1	3	3	3	3	3	3	3	3	3	2	3	3	3	3	3	3	3	3	3	3	3	2	3	3	3	3	3	3	3	3	3	3	3	2	3	3	3	3	3	41.3	41.3
Q5VT40	Q5VT40	1	1	1	Protein FAM78B	FAM78B		1	1	1	1	1	1	1	1	1	1	1	1	0	1	1	0	1	1	1	1	1	1	1	1	0	1	1	0	1	1	1	1	1	1	1	1	0	1	1	0	2021-06-04	2021-06-04
Q5VT52	Q5VT52	3	3	3	Regulation of nuclear pre-mRNA domain-containing protein 2	RPRD2		1	3	3	3	2	1	2	2	3	3	1	3	3	2	3	2	2	1	2	2	3	3	1	3	3	2	3	2	2	1	2	2	3	3	1	3	3	2	3	2	2021-01-04	2021-01-04
Q5VTR2	Q5VTR2	1	1	1	E3 ubiquitin-protein ligase BRE1A	RNF20		1	1	1	1	1	1	1	1	1	1	0	1	1	1	1	1	1	1	1	1	1	1	0	1	1	1	1	1	1	1	1	1	1	1	0	1	1	1	1	1	2021-01-01	2021-01-01
Q5VW32	Q5VW32	3	3	3	BRO1 domain-containing protein BROX	BROX		1	3	3	3	3	2	2	2	2	1	2	2	1	2	2	2	3	2	2	2	2	1	2	2	1	2	2	2	3	2	2	2	2	1	2	2	1	2	2	2	2021-02-12	2021-02-12
Q5VW36	Q5VW36	1	1	1	Focadhesin	FOCAD		1	1	1	1	1	1	0	1	0	0	1	1	1	1	1	0	1	1	0	1	0	0	1	1	1	1	1	0	1	1	0	1	0	0	1	1	1	1	1	0	0.4	0.4
Q5VWZ2	Q5VWZ2	2	2	2	Lysophospholipase-like protein 1	LYPLAL1		1	2	2	2	1	0	1	1	1	1	1	1	1	1	1	1	1	0	1	1	1	1	1	1	1	1	1	1	1	0	1	1	1	1	1	1	1	1	1	1	2021-08-11	2021-08-11
Q5VYK3	Q5VYK3	4	4	4	Proteasome-associated protein ECM29 homolog	ECM29		1	4	4	4	2	3	3	4	4	4	3	3	4	3	4	2	2	3	3	4	4	4	3	3	4	3	4	2	2	3	3	4	4	4	3	3	4	3	4	2	3	3
Q7L523;Q5VZM2	Q7L523;Q5VZM2	1;1	1;1	1;1	Ras-related GTP-binding protein A;Ras-related GTP-binding protein B	RRAGA;RRAGB	;	2	1	1	1	1	1	1	1	1	1	1	1	1	1	1	1	1	1	1	1	1	1	1	1	1	1	1	1	1	1	1	1	1	1	1	1	1	1	1	1	2021-02-03	2021-02-03
Q5XKP0	Q5XKP0	2	2	2	Protein QIL1	QIL1		1	2	2	2	0	1	1	1	2	1	0	1	1	2	2	0	0	1	1	1	2	1	0	1	1	2	2	0	0	1	1	1	2	1	0	1	1	2	2	0	41.5	41.5
Q5ZPR3	Q5ZPR3	3	3	3	CD276 antigen	CD276		1	3	3	3	2	2	2	2	2	2	2	3	3	3	2	2	2	2	2	2	2	2	2	3	3	3	2	2	2	2	2	2	2	2	2	3	3	3	2	2	2021-02-17	2021-02-17
Q63HN8	Q63HN8	7	7	7	E3 ubiquitin-protein ligase RNF213	RNF213		1	7	7	7	5	4	6	6	5	5	4	5	5	5	2	3	5	4	6	6	5	5	4	5	5	5	2	3	5	4	6	6	5	5	4	5	5	5	2	3	2021-09-01	2021-09-01
Q63ZY3	Q63ZY3	3	3	3	KN motif and ankyrin repeat domain-containing protein 2	KANK2		1	3	3	3	2	3	3	2	2	3	1	0	0	2	2	2	2	3	3	2	2	3	1	0	0	2	2	2	2	3	3	2	2	3	1	0	0	2	2	2	2021-03-04	2021-03-04
Q643R3	Q643R3	2	2	2	Lysophospholipid acyltransferase LPCAT4	LPCAT4		1	2	2	2	2	2	2	2	2	2	2	2	2	2	2	2	2	2	2	2	2	2	2	2	2	2	2	2	2	2	2	2	2	2	2	2	2	2	2	2	2021-08-07	2021-08-07
Q66K14	Q66K14	6	6	6	TBC1 domain family member 9B	TBC1D9B		1	6	6	6	4	3	5	5	6	6	3	5	4	5	5	5	4	3	5	5	6	6	3	5	4	5	5	5	4	3	5	5	6	6	3	5	4	5	5	5	2021-04-07	2021-04-07
Q66K74	Q66K74	10	10	10	Microtubule-associated protein 1S;MAP1S heavy chain;MAP1S light chain	MAP1S		1	10	10	10	10	8	8	9	10	10	9	9	10	8	8	8	10	8	8	9	10	10	9	9	10	8	8	8	10	8	8	9	10	10	9	9	10	8	8	8	2021-01-16	2021-01-16
Q68CZ2;Q63HR2;Q9HBL0	Q68CZ2	17;2;2	17;2;2	17;2;2	Tensin-3	TNS3		3	17	17	17	14	13	13	12	16	15	14	13	16	15	13	15	14	13	13	12	16	15	14	13	16	15	13	15	14	13	13	12	16	15	14	13	16	15	13	15	2021-04-20	2021-04-20
Q68E01	Q68E01	2	2	2	Integrator complex subunit 3	INTS3		1	2	2	2	1	2	1	2	0	2	1	2	1	2	2	2	1	2	1	2	0	2	1	2	1	2	2	2	1	2	1	2	0	2	1	2	1	2	2	2	2021-05-04	2021-05-04
Q68EM7	Q68EM7	6	6	6	Rho GTPase-activating protein 17	ARHGAP17		1	6	6	6	3	4	3	5	6	4	4	4	3	6	6	4	3	4	3	5	6	4	4	4	3	6	6	4	3	4	3	5	6	4	4	4	3	6	6	4	2021-06-10	2021-06-10
Q6DD88	Q6DD88	9	9	9	Atlastin-3	ATL3		1	9	9	9	8	7	4	7	5	7	7	7	7	9	8	7	8	7	4	7	5	7	7	7	7	9	8	7	8	7	4	7	5	7	7	7	7	9	8	7	2021-08-21	2021-08-21
Q6DKI1	Q6DKI1	2	2	2	60S ribosomal protein L7-like 1	RPL7L1		1	2	2	2	2	1	1	2	2	2	2	2	2	2	2	2	2	1	1	2	2	2	2	2	2	2	2	2	2	1	1	2	2	2	2	2	2	2	2	2	2021-08-11	2021-08-11
Q6DKJ4	Q6DKJ4	2	2	2	Nucleoredoxin	NXN		1	2	2	2	0	1	2	0	1	1	0	0	0	2	1	0	0	1	2	0	1	1	0	0	0	2	1	0	0	1	2	0	1	1	0	0	0	2	1	0	2021-02-06	2021-02-06
Q6FI81	Q6FI81	2	2	2	Anamorsin	CIAPIN1		1	2	2	2	2	2	2	2	2	2	2	2	2	2	2	2	2	2	2	2	2	2	2	2	2	2	2	2	2	2	2	2	2	2	2	2	2	2	2	2	2021-03-08	2021-03-08
Q6GMV3	Q6GMV3	2	2	2	Putative peptidyl-tRNA hydrolase PTRHD1	PTRHD1		1	2	2	2	2	2	2	2	2	2	2	2	2	2	2	2	2	2	2	2	2	2	2	2	2	2	2	2	2	2	2	2	2	2	2	2	2	2	2	2	2021-07-15	2021-07-15
Q6GTX8;Q6ISS4	Q6GTX8	4;1	4;1	4;1	Leukocyte-associated immunoglobulin-like receptor 1	LAIR1		2	4	4	4	3	3	3	3	3	4	3	3	3	3	3	3	3	3	3	3	3	4	3	3	3	3	3	3	3	3	3	3	3	4	3	3	3	3	3	3	2021-03-21	2021-03-21
Q6IAA8	Q6IAA8	7	7	7	Ragulator complex protein LAMTOR1	LAMTOR1		1	7	7	7	7	7	7	6	7	7	7	7	7	6	6	7	7	7	7	6	7	7	7	7	7	6	6	7	7	7	7	6	7	7	7	7	7	6	6	7	64.6	64.6
Q6IBS0	Q6IBS0	14	14	14	Twinfilin-2	TWF2		1	14	14	14	11	13	13	14	12	12	12	12	13	13	13	13	11	13	13	14	12	12	12	12	13	13	13	13	11	13	13	14	12	12	12	12	13	13	13	13	51.3	51.3
Q6IC98	Q6IC98	3	3	3	GRAM domain-containing protein 4	GRAMD4		1	3	3	3	2	1	3	3	2	1	2	1	1	1	2	1	2	1	3	3	2	1	2	1	1	1	2	1	2	1	3	3	2	1	2	1	1	1	2	1	2021-02-05	2021-02-05
Q6ICG6	Q6ICG6	2	2	2	Uncharacterized protein KIAA0930	KIAA0930		1	2	2	2	0	1	1	1	1	0	0	1	0	1	0	0	0	1	1	1	1	0	0	1	0	1	0	0	0	1	1	1	1	0	0	1	0	1	0	0	2021-02-06	2021-02-06
Q6IN85;Q5MIZ7	Q6IN85	5;2	5;2	5;2	Serine/threonine-protein phosphatase 4 regulatory subunit 3A	SMEK1		2	5	5	5	3	3	3	4	5	5	3	4	2	3	2	1	3	3	3	4	5	5	3	4	2	3	2	1	3	3	3	4	5	5	3	4	2	3	2	1	2021-03-08	2021-03-08
Q6JBY9	Q6JBY9	2	2	2	CapZ-interacting protein	RCSD1		1	2	2	2	0	2	2	2	1	1	0	2	2	1	2	1	0	2	2	2	1	1	0	2	2	1	2	1	0	2	2	2	1	1	0	2	2	1	2	1	2021-01-11	2021-01-11
Q6JQN1	Q6JQN1	4	4	4	Acyl-CoA dehydrogenase family member 10	ACAD10		1	4	4	4	2	2	3	2	3	2	3	2	3	2	3	2	2	2	3	2	3	2	3	2	3	2	3	2	2	2	3	2	3	2	3	2	3	2	3	2	2021-03-03	2021-03-03
Q6L8Q7	Q6L8Q7	1	1	1	2,5-phosphodiesterase 12	PDE12		1	1	1	1	1	1	1	1	1	0	0	1	0	1	1	1	1	1	1	1	1	0	0	1	0	1	1	1	1	1	1	1	1	0	0	1	0	1	1	1	2	2
Q6NUK1	Q6NUK1	7	7	7	Calcium-binding mitochondrial carrier protein SCaMC-1	SLC25A24		1	7	7	7	6	6	5	7	6	6	6	6	5	6	6	6	6	6	5	7	6	6	6	6	5	6	6	6	6	6	5	7	6	6	6	6	5	6	6	6	2021-08-16	2021-08-16
Q6NYC8	Q6NYC8	5	5	5	Phostensin	PPP1R18		1	5	5	5	4	3	5	5	5	5	3	5	5	5	5	5	4	3	5	5	5	5	3	5	5	5	5	5	4	3	5	5	5	5	3	5	5	5	5	5	2021-08-14	2021-08-14
Q6P1J9	Q6P1J9	4	4	4	Parafibromin	CDC73		1	4	4	4	1	4	2	2	2	3	2	3	3	2	4	4	1	4	2	2	2	3	2	3	3	2	4	4	1	4	2	2	2	3	2	3	3	2	4	4	2021-05-08	2021-05-08
Q6P1L8	Q6P1L8	4	4	4	39S ribosomal protein L14, mitochondrial	MRPL14		1	4	4	4	3	3	4	4	4	4	4	4	4	3	4	4	3	3	4	4	4	4	4	4	4	3	4	4	3	3	4	4	4	4	4	4	4	3	4	4	2021-08-24	2021-08-24
Q6P1M0	Q6P1M0	3	3	3	Long-chain fatty acid transport protein 4	SLC27A4		1	3	3	3	2	3	3	3	1	2	3	3	3	2	1	2	2	3	3	3	1	2	3	3	3	2	1	2	2	3	3	3	1	2	3	3	3	2	1	2	2021-02-06	2021-02-06
Q6P1N9	Q6P1N9	2	2	2	Putative deoxyribonuclease TATDN1	TATDN1		1	2	2	2	0	0	2	1	0	0	0	1	1	0	1	1	0	0	2	1	0	0	0	1	1	0	1	1	0	0	2	1	0	0	0	1	1	0	1	1	2021-04-09	2021-04-09
Q6P2E9	Q6P2E9	7	7	7	Enhancer of mRNA-decapping protein 4	EDC4		1	7	7	7	5	5	6	6	6	6	2	6	5	5	4	6	5	5	6	6	6	6	2	6	5	5	4	6	5	5	6	6	6	6	2	6	5	5	4	6	2021-09-09	2021-09-09
Q6P2Q9	Q6P2Q9	14	14	14	Pre-mRNA-processing-splicing factor 8	PRPF8		1	14	14	14	9	12	7	11	12	12	8	13	11	13	14	9	9	12	7	11	12	12	8	13	11	13	14	9	9	12	7	11	12	12	8	13	11	13	14	9	2021-02-09	2021-02-09
Q6P587	Q6P587	2	2	2	Acylpyruvase FAHD1, mitochondrial	FAHD1		1	2	2	2	1	1	1	2	1	1	1	2	1	2	1	1	1	1	1	2	1	1	1	2	1	2	1	1	1	1	1	2	1	1	1	2	1	2	1	1	21	21
Q6P589	Q6P589	2	2	2	Tumor necrosis factor alpha-induced protein 8-like protein 2	TNFAIP8L2		1	2	2	2	2	2	1	1	1	2	2	1	2	2	2	2	2	2	1	1	1	2	2	1	2	2	2	2	2	2	1	1	1	2	2	1	2	2	2	2	2021-05-18	2021-05-18
Q6P996	Q6P996	3	3	3	Pyridoxal-dependent decarboxylase domain-containing protein 1	PDXDC1		1	3	3	3	1	1	1	2	1	1	2	3	2	3	3	0	1	1	1	2	1	1	2	3	2	3	3	0	1	1	1	2	1	1	2	3	2	3	3	0	2021-09-04	2021-09-04
Q6PCB7	Q6PCB7	2	2	2	Long-chain fatty acid transport protein 1	SLC27A1		1	2	2	2	2	2	1	0	1	1	2	1	0	1	1	2	2	2	1	0	1	1	2	1	0	1	1	2	2	2	1	0	1	1	2	1	0	1	1	2	2021-08-04	2021-08-04
Q6PD62	Q6PD62	1	1	1	RNA polymerase-associated protein CTR9 homolog	CTR9		1	1	1	1	0	0	0	1	1	1	1	0	1	0	1	1	0	0	0	1	1	1	1	0	1	0	1	1	0	0	0	1	1	1	1	0	1	0	1	1	2021-06-01	2021-06-01
Q6PGP7	Q6PGP7	4	4	4	Tetratricopeptide repeat protein 37	TTC37		1	4	4	4	2	4	3	3	3	3	4	4	3	4	2	4	2	4	3	3	3	3	4	4	3	4	2	4	2	4	3	3	3	3	4	4	3	4	2	4	2021-07-04	2021-07-04
Q6PHR2	Q6PHR2	1	1	1	Serine/threonine-protein kinase ULK3	ULK3		1	1	1	1	1	1	1	1	1	1	0	1	1	1	1	0	1	1	1	1	1	1	0	1	1	1	1	0	1	1	1	1	1	1	0	1	1	1	1	0	2021-05-02	2021-05-02
Q6PI48	Q6PI48	1	1	1	Aspartate--tRNA ligase, mitochondrial	DARS2		1	1	1	1	1	1	1	1	1	1	1	1	0	1	1	1	1	1	1	1	1	1	1	1	0	1	1	1	1	1	1	1	1	1	1	1	0	1	1	1	2021-04-01	2021-04-01
Q6PIU2	Q6PIU2	3	3	3	Neutral cholesterol ester hydrolase 1	NCEH1		1	3	3	3	2	3	2	3	2	2	3	2	2	3	3	2	2	3	2	3	2	2	3	2	2	3	3	2	2	3	2	3	2	2	3	2	2	3	3	2	2021-08-09	2021-08-09
Q6PJT7	Q6PJT7	4	4	4	Zinc finger CCCH domain-containing protein 14	ZC3H14		1	4	4	4	1	3	3	3	3	2	2	2	3	2	4	3	1	3	3	3	3	2	2	2	3	2	4	3	1	3	3	3	3	2	2	2	3	2	4	3	2021-08-06	2021-08-06
Q6PJW8	Q6PJW8	2	2	2	Consortin	CNST		1	2	2	2	1	2	1	2	1	0	2	1	2	1	2	2	1	2	1	2	1	0	2	1	2	1	2	2	1	2	1	2	1	0	2	1	2	1	2	2	4	4
Q6PKG0	Q6PKG0	6	6	6	La-related protein 1	LARP1		1	6	6	6	4	3	3	4	3	5	2	3	5	5	6	5	4	3	3	4	3	5	2	3	5	5	6	5	4	3	3	4	3	5	2	3	5	5	6	5	2021-09-08	2021-09-08
Q6RW13	Q6RW13	1	1	1	Type-1 angiotensin II receptor-associated protein	AGTRAP		1	1	1	1	1	1	1	1	1	1	1	1	1	1	1	1	1	1	1	1	1	1	1	1	1	1	1	1	1	1	1	1	1	1	1	1	1	1	1	1	2021-07-10	2021-07-10
Q6UB35	Q6UB35	3	3	3	Monofunctional C1-tetrahydrofolate synthase, mitochondrial	MTHFD1L		1	3	3	3	3	3	3	3	3	3	3	3	3	3	3	3	3	3	3	3	3	3	3	3	3	3	3	3	3	3	3	3	3	3	3	3	3	3	3	3	2021-05-04	2021-05-04
Q6UN15	Q6UN15	3	3	3	Pre-mRNA 3-end-processing factor FIP1	FIP1L1		1	3	3	3	2	2	2	3	1	2	1	2	1	3	3	2	2	2	2	3	1	2	1	2	1	3	3	2	2	2	2	3	1	2	1	2	1	3	3	2	2021-02-08	2021-02-08
Q6UW02	Q6UW02	1	1	1	Cytochrome P450 20A1	CYP20A1		1	1	1	1	1	1	0	1	1	1	0	1	1	1	1	1	1	1	0	1	1	1	0	1	1	1	1	1	1	1	0	1	1	1	0	1	1	1	1	1	2021-05-03	2021-05-03
Q6UW68	Q6UW68	2	2	2	Transmembrane protein 205	TMEM205		1	2	2	2	1	2	1	2	2	2	2	2	2	1	2	2	1	2	1	2	2	2	2	2	2	1	2	2	1	2	1	2	2	2	2	2	2	1	2	2	2021-09-16	2021-09-16
Q6UX53	Q6UX53	8	8	8	Methyltransferase-like protein 7B	METTL7B		1	8	8	8	8	8	8	8	8	8	6	8	8	8	8	8	8	8	8	8	8	8	6	8	8	8	8	8	8	8	8	8	8	8	6	8	8	8	8	8	42.2	42.2
Q6UX71	Q6UX71	3	3	3	Plexin domain-containing protein 2	PLXDC2		1	3	3	3	3	3	2	3	3	3	3	3	3	3	3	2	3	3	2	3	3	3	3	3	3	3	3	2	3	3	2	3	3	3	3	3	3	3	3	2	7	7
Q6UXH1	Q6UXH1	2	2	2	Cysteine-rich with EGF-like domain protein 2	CRELD2		1	2	2	2	1	2	2	2	1	2	0	2	2	1	1	1	1	2	2	2	1	2	0	2	2	1	1	1	1	2	2	2	1	2	0	2	2	1	1	1	2021-09-07	2021-09-07
Q6UXN9	Q6UXN9	4	4	4	WD repeat-containing protein 82	WDR82		1	4	4	4	2	3	2	4	3	3	1	4	3	4	4	2	2	3	2	4	3	3	1	4	3	4	4	2	2	3	2	4	3	3	1	4	3	4	4	2	2021-05-27	2021-05-27
Q6UXV4	Q6UXV4	3	3	3	MICOS complex subunit MIC27	APOOL		1	3	3	3	3	3	3	2	3	3	1	3	3	3	3	3	3	3	3	2	3	3	1	3	3	3	3	3	3	3	3	2	3	3	1	3	3	3	3	3	2021-04-19	2021-04-19
Q6WKZ4;Q7L804	Q6WKZ4	4;1	4;1	4;1	Rab11 family-interacting protein 1	RAB11FIP1		2	4	4	4	4	4	3	4	4	4	4	4	4	4	4	4	4	4	3	4	4	4	4	4	4	4	4	4	4	4	3	4	4	4	4	4	4	4	4	4	2021-03-04	2021-03-04
Q6XQN6	Q6XQN6	21	21	21	Nicotinate phosphoribosyltransferase	NAPRT		1	21	21	21	19	20	13	17	19	18	18	20	16	20	20	19	19	20	13	17	19	18	18	20	16	20	20	19	19	20	13	17	19	18	18	20	16	20	20	19	55.8	55.8
Q6Y7W6	Q6Y7W6	2	2	2	PERQ amino acid-rich with GYF domain-containing protein 2	GIGYF2		1	2	2	2	1	1	2	2	2	1	1	1	1	2	1	2	1	1	2	2	2	1	1	1	1	2	1	2	1	1	2	2	2	1	1	1	1	2	1	2	2021-09-02	2021-09-02
Q6YHK3	Q6YHK3	3	3	3	CD109 antigen	CD109		1	3	3	3	2	2	2	2	2	3	3	3	2	2	2	2	2	2	2	2	2	3	3	3	2	2	2	2	2	2	2	2	2	3	3	3	2	2	2	2	2021-02-04	2021-02-04
Q6YN16	Q6YN16	7	7	7	Hydroxysteroid dehydrogenase-like protein 2	HSDL2		1	7	7	7	6	6	6	7	7	7	5	7	6	7	7	6	6	6	6	7	7	7	5	7	6	7	7	6	6	6	6	7	7	7	5	7	6	7	7	6	2021-02-28	2021-02-28
Q6YP21	Q6YP21	3	3	3	Kynurenine--oxoglutarate transaminase 3	CCBL2		1	3	3	3	2	1	3	2	2	3	2	3	3	3	3	3	2	1	3	2	2	3	2	3	3	3	3	3	2	1	3	2	2	3	2	3	3	3	3	3	2021-09-11	2021-09-11
Q6ZMI0	Q6ZMI0	2	2	2	Protein phosphatase 1 regulatory subunit 21	PPP1R21		1	2	2	2	2	2	2	2	2	2	1	2	2	2	1	2	2	2	2	2	2	2	1	2	2	2	1	2	2	2	2	2	2	2	1	2	2	2	1	2	2021-01-04	2021-01-04
Q6ZMZ3	Q6ZMZ3	1	1	1	Nesprin-3	SYNE3		1	1	1	1	0	1	0	1	0	1	0	1	0	0	1	0	0	1	0	1	0	1	0	1	0	0	1	0	0	1	0	1	0	1	0	1	0	0	1	0	2021-08-02	2021-08-02
Q6ZSR9	Q6ZSR9	2	2	2	Uncharacterized protein FLJ45252			1	2	2	2	1	1	2	2	2	2	0	2	2	1	2	1	1	1	2	2	2	2	0	2	2	1	2	1	1	1	2	2	2	2	0	2	2	1	2	1	11	11
Q6ZT21	Q6ZT21	2	2	2	Transmembrane protein with metallophosphoesterase domain	TMPPE		1	2	2	2	2	2	2	2	2	1	2	2	2	1	1	1	2	2	2	2	2	1	2	2	2	1	1	1	2	2	2	2	2	1	2	2	2	1	1	1	2021-05-05	2021-05-05
Q6ZTQ4	Q6ZTQ4	2	2	2	Cadherin-related family member 3	CDHR3		1	2	2	2	1	1	0	1	0	0	1	0	1	0	1	0	1	1	0	1	0	0	1	0	1	0	1	0	1	1	0	1	0	0	1	0	1	0	1	0	2021-06-02	2021-06-02
Q6ZUT6	Q6ZUT6	1	1	1	Uncharacterized protein C15orf52	C15orf52		1	1	1	1	1	1	0	0	1	1	1	1	1	1	1	0	1	1	0	0	1	1	1	1	1	1	1	0	1	1	0	0	1	1	1	1	1	1	1	0	2021-09-01	2021-09-01
Q6ZVK8	Q6ZVK8	1	1	1	8-oxo-dGDP phosphatase NUDT18	NUDT18		1	1	1	1	0	1	0	1	1	1	0	1	1	1	1	1	0	1	0	1	1	1	0	1	1	1	1	1	0	1	0	1	1	1	0	1	1	1	1	1	2021-01-11	2021-01-11
Q709C8	Q709C8	7	7	7	Vacuolar protein sorting-associated protein 13C	VPS13C		1	7	7	7	4	4	6	6	5	4	3	6	6	4	7	6	4	4	6	6	5	4	3	6	6	4	7	6	4	4	6	6	5	4	3	6	6	4	7	6	2021-09-02	2021-09-02
Q70J99	Q70J99	1	1	1	Protein unc-13 homolog D	UNC13D		1	1	1	1	1	1	1	1	0	1	1	1	1	1	1	1	1	1	1	1	0	1	1	1	1	1	1	1	1	1	1	1	0	1	1	1	1	1	1	1	2021-03-01	2021-03-01
Q71DI3	Q71DI3	13	13	1	Histone H3.2	HIST2H3A		1	13	13	1	11	13	13	12	12	12	12	12	12	12	13	13	11	13	13	12	12	12	12	12	12	12	13	13	1	1	1	1	1	1	1	1	1	1	1	1	64	64
Q71U36;P0DPH8;P0DPH7;Q6PEY2	Q71U36;P0DPH8;P0DPH7;Q6PEY2	23;20;20;15	3;3;3;3	1;1;1;1	Tubulin alpha-1A chain;Tubulin alpha-3E chain	TUBA1A;TUBA3E	;;;	4	23	3	1	21	21	20	21	20	20	21	22	20	22	23	20	3	3	3	3	3	3	3	3	3	3	3	3	1	1	1	1	1	1	1	1	1	1	1	1	63.9	2021-02-12
Q76KD6	Q76KD6	2	2	2	Speriolin	SPATC1		1	2	2	2	1	0	0	1	0	0	0	0	0	0	0	0	1	0	0	1	0	0	0	0	0	0	0	0	1	0	0	1	0	0	0	0	0	0	0	0	2021-04-03	2021-04-03
Q7KZF4	Q7KZF4	44	44	44	Staphylococcal nuclease domain-containing protein 1	SND1		1	44	44	44	39	37	30	37	36	40	38	36	38	38	36	35	39	37	30	37	36	40	38	36	38	38	36	35	39	37	30	37	36	40	38	36	38	38	36	35	58.7	58.7
Q7L014	Q7L014	15	15	15	Probable ATP-dependent RNA helicase DDX46	DDX46		1	15	15	15	10	14	14	12	14	14	7	13	14	13	15	13	10	14	14	12	14	14	7	13	14	13	15	13	10	14	14	12	14	14	7	13	14	13	15	13	2021-08-16	2021-08-16
Q7L0Y3	Q7L0Y3	4	4	4	Mitochondrial ribonuclease P protein 1	TRMT10C		1	4	4	4	3	1	2	2	3	4	2	3	2	3	4	2	3	1	2	2	3	4	2	3	2	3	4	2	3	1	2	2	3	4	2	3	2	3	4	2	2021-04-14	2021-04-14
Q7L1Q6	Q7L1Q6	2	2	2	Basic leucine zipper and W2 domain-containing protein 1	BZW1		1	2	2	2	1	1	1	0	0	0	1	2	2	1	2	1	1	1	1	0	0	0	1	2	2	1	2	1	1	1	1	0	0	0	1	2	2	1	2	1	2021-01-08	2021-01-08
Q7L1W4	Q7L1W4	2	2	2	Volume-regulated anion channel subunit LRRC8D	LRRC8D		1	2	2	2	1	2	2	2	1	2	1	2	1	2	2	1	1	2	2	2	1	2	1	2	1	2	2	1	1	2	2	2	1	2	1	2	1	2	2	1	2021-07-03	2021-07-03
Q7L2E3	Q7L2E3	5	5	5	Putative ATP-dependent RNA helicase DHX30	DHX30		1	5	5	5	4	3	2	4	5	5	2	3	3	4	4	4	4	3	2	4	5	5	2	3	3	4	4	4	4	3	2	4	5	5	2	3	3	4	4	4	8	8
Q7L2H7	Q7L2H7	2	2	2	Eukaryotic translation initiation factor 3 subunit M	EIF3M		1	2	2	2	1	2	1	1	1	2	1	2	2	2	2	1	1	2	1	1	1	2	1	2	2	2	2	1	1	2	1	1	1	2	1	2	2	2	2	1	2021-03-08	2021-03-08
Q7L576;Q96F07	Q7L576;Q96F07	13;7	13;7	13;7	Cytoplasmic FMR1-interacting protein 1;Cytoplasmic FMR1-interacting protein 2	CYFIP1;CYFIP2	;	2	13	13	13	9	11	9	11	12	11	8	11	10	11	12	11	9	11	9	11	12	11	8	11	10	11	12	11	9	11	9	11	12	11	8	11	10	11	12	11	2021-01-12	2021-01-12
Q7L591	Q7L591	8	8	8	Docking protein 3	DOK3		1	8	8	8	5	8	7	6	8	7	5	7	6	6	8	7	5	8	7	6	8	7	5	7	6	6	8	7	5	8	7	6	8	7	5	7	6	6	8	7	2021-02-22	2021-02-22
Q7L5N7	Q7L5N7	4	4	4	Lysophosphatidylcholine acyltransferase 2	LPCAT2		1	4	4	4	4	4	3	4	4	4	4	4	4	4	4	3	4	4	3	4	4	4	4	4	4	4	4	3	4	4	3	4	4	4	4	4	4	4	4	3	2021-04-13	2021-04-13
Q9H8S9;Q7L9L4	Q9H8S9;Q7L9L4	4;4	4;4	4;4	MOB kinase activator 1A;MOB kinase activator 1B	MOB1A;MOB1B	;	2	4	4	4	3	3	4	3	3	2	2	4	3	2	4	4	3	3	4	3	3	2	2	4	3	2	4	4	3	3	4	3	3	2	2	4	3	2	4	4	2021-01-17	2021-01-17
Q7LBC6	Q7LBC6	3	3	3	Lysine-specific demethylase 3B	KDM3B		1	3	3	3	1	2	3	2	3	3	0	2	2	2	3	2	1	2	3	2	3	3	0	2	2	2	3	2	1	2	3	2	3	3	0	2	2	2	3	2	2021-01-04	2021-01-04
Q7LBR1	Q7LBR1	1	1	1	Charged multivesicular body protein 1b	CHMP1B		1	1	1	1	1	1	1	1	1	1	1	1	1	1	1	0	1	1	1	1	1	1	1	1	1	1	1	0	1	1	1	1	1	1	1	1	1	1	1	0	2021-05-04	2021-05-04
Q7LGA3	Q7LGA3	2	2	2	Heparan sulfate 2-O-sulfotransferase 1	HS2ST1		1	2	2	2	2	2	2	1	1	1	2	1	2	2	1	2	2	2	2	1	1	1	2	1	2	2	1	2	2	2	2	1	1	1	2	1	2	2	1	2	2021-09-07	2021-09-07
Q7RTV0	Q7RTV0	3	3	3	PHD finger-like domain-containing protein 5A	PHF5A		1	3	3	3	1	3	2	3	3	3	1	2	2	2	3	2	1	3	2	3	3	3	1	2	2	2	3	2	1	3	2	3	3	3	1	2	2	2	3	2	2021-05-25	2021-05-25
Q7Z2K6	Q7Z2K6	10	10	10	Endoplasmic reticulum metallopeptidase 1	ERMP1		1	10	10	10	8	9	7	9	9	10	10	9	10	9	10	9	8	9	7	9	9	10	10	9	10	9	10	9	8	9	7	9	9	10	10	9	10	9	10	9	2021-01-13	2021-01-13
Q7Z2W4	Q7Z2W4	10	10	10	Zinc finger CCCH-type antiviral protein 1	ZC3HAV1		1	10	10	10	8	9	6	6	7	7	5	7	8	7	7	8	8	9	6	6	7	7	5	7	8	7	7	8	8	9	6	6	7	7	5	7	8	7	7	8	2021-05-16	2021-05-16
Q7Z2W9	Q7Z2W9	2	2	2	39S ribosomal protein L21, mitochondrial	MRPL21		1	2	2	2	2	2	2	2	2	2	2	2	2	2	2	2	2	2	2	2	2	2	2	2	2	2	2	2	2	2	2	2	2	2	2	2	2	2	2	2	2021-06-14	2021-06-14
Q7Z3B4	Q7Z3B4	2	2	2	Nucleoporin p54	NUP54		1	2	2	2	1	1	0	0	0	0	1	1	0	1	2	1	1	1	0	0	0	0	1	1	0	1	2	1	1	1	0	0	0	0	1	1	0	1	2	1	2021-03-04	2021-03-04
Q7Z3D6	Q7Z3D6	5	5	5	UPF0317 protein C14orf159, mitochondrial	C14orf159		1	5	5	5	3	2	5	4	3	4	2	4	3	4	4	4	3	2	5	4	3	4	2	4	3	4	4	4	3	2	5	4	3	4	2	4	3	4	4	4	2021-08-13	2021-08-13
Q7Z3E5	Q7Z3E5	1	1	1	LisH domain-containing protein ARMC9	ARMC9		1	1	1	1	0	0	1	1	0	0	0	0	0	0	0	0	0	0	1	1	0	0	0	0	0	0	0	0	0	0	1	1	0	0	0	0	0	0	0	0	2021-08-01	2021-08-01
Q7Z3J2	Q7Z3J2	1	1	1	UPF0505 protein C16orf62	C16orf62		1	1	1	1	1	1	1	1	1	1	1	1	1	1	0	1	1	1	1	1	1	1	1	1	1	1	0	1	1	1	1	1	1	1	1	1	1	1	0	1	2021-04-02	2021-04-02
Q7Z3Z4	Q7Z3Z4	1	1	1	Piwi-like protein 4	PIWIL4		1	1	1	1	1	0	0	0	0	0	1	0	0	0	0	0	1	0	0	0	0	0	1	0	0	0	0	0	1	0	0	0	0	0	1	0	0	0	0	0	2021-08-01	2021-08-01
Q7Z417	Q7Z417	2	2	2	Nuclear fragile X mental retardation-interacting protein 2	NUFIP2		1	2	2	2	1	2	2	2	2	2	1	2	2	2	2	2	1	2	2	2	2	2	1	2	2	2	2	2	1	2	2	2	2	2	1	2	2	2	2	2	2021-05-03	2021-05-03
Q7Z478	Q7Z478	4	4	4	ATP-dependent RNA helicase DHX29	DHX29		1	4	4	4	2	4	2	1	3	3	1	0	1	2	3	1	2	4	2	1	3	3	1	0	1	2	3	1	2	4	2	1	3	3	1	0	1	2	3	1	2021-07-05	2021-07-05
Q7Z4H3	Q7Z4H3	1	1	1	HD domain-containing protein 2	HDDC2		1	1	1	1	0	0	0	1	0	0	0	0	1	0	0	0	0	0	0	1	0	0	0	0	1	0	0	0	0	0	0	1	0	0	0	0	1	0	0	0	2021-04-06	2021-04-06
Q7Z4H8	Q7Z4H8	3	3	3	KDEL motif-containing protein 2	KDELC2		1	3	3	3	1	2	2	2	2	1	1	2	3	1	2	2	1	2	2	2	2	1	1	2	3	1	2	2	1	2	2	2	2	1	1	2	3	1	2	2	2021-01-09	2021-01-09
Q7Z4Q2	Q7Z4Q2	4	4	4	HEAT repeat-containing protein 3	HEATR3		1	4	4	4	2	3	3	4	3	3	2	3	3	4	4	3	2	3	3	4	3	3	2	3	3	4	4	3	2	3	3	4	3	3	2	3	3	4	4	3	2021-09-05	2021-09-05
Q7Z4W1	Q7Z4W1	7	7	7	L-xylulose reductase	DCXR		1	7	7	7	5	5	4	7	7	5	3	5	6	6	6	6	5	5	4	7	7	5	3	5	6	6	6	6	5	5	4	7	7	5	3	5	6	6	6	6	36.5	36.5
Q7Z589	Q7Z589	2	2	2	Protein EMSY	EMSY		1	2	2	2	0	1	0	0	0	0	0	0	1	1	0	0	0	1	0	0	0	0	0	0	1	1	0	0	0	1	0	0	0	0	0	0	1	1	0	0	2021-04-01	2021-04-01
Q7Z5L9	Q7Z5L9	1	1	1	Interferon regulatory factor 2-binding protein 2	IRF2BP2		1	1	1	1	0	1	1	1	1	1	0	0	0	1	1	0	0	1	1	1	1	1	0	0	0	1	1	0	0	1	1	1	1	1	0	0	0	1	1	0	2021-04-03	2021-04-03
Q7Z5R6	Q7Z5R6	11	11	11	Amyloid beta A4 precursor protein-binding family B member 1-interacting protein	APBB1IP		1	11	11	11	8	11	8	11	11	10	9	11	9	11	11	11	8	11	8	11	11	10	9	11	9	11	11	11	8	11	8	11	11	10	9	11	9	11	11	11	2021-07-20	2021-07-20
Q7Z6Z7	Q7Z6Z7	12	12	12	E3 ubiquitin-protein ligase HUWE1	HUWE1		1	12	12	12	10	12	8	10	10	9	5	10	10	10	11	9	10	12	8	10	10	9	5	10	10	10	11	9	10	12	8	10	10	9	5	10	10	10	11	9	2021-04-05	2021-04-05
Q7Z7H5	Q7Z7H5	2	1	1	Transmembrane emp24 domain-containing protein 4	TMED4		1	2	1	1	1	1	2	2	2	1	1	2	2	1	2	1	1	1	1	1	1	1	1	1	1	1	1	1	1	1	1	1	1	1	1	1	1	1	1	1	15	2021-05-07
Q7Z7H8	Q7Z7H8	1	1	1	39S ribosomal protein L10, mitochondrial	MRPL10		1	1	1	1	1	1	0	1	1	1	1	1	1	1	1	1	1	1	0	1	1	1	1	1	1	1	1	1	1	1	0	1	1	1	1	1	1	1	1	1	2021-03-07	2021-03-07
Q7Z7K0	Q7Z7K0	2	2	2	COX assembly mitochondrial protein homolog	CMC1		1	2	2	2	1	1	2	2	2	2	1	2	2	2	2	0	1	1	2	2	2	2	1	2	2	2	2	0	1	1	2	2	2	2	1	2	2	2	2	0	2021-09-17	2021-09-17
Q7Z7K6	Q7Z7K6	1	1	1	Centromere protein V	CENPV		1	1	1	1	0	1	1	0	0	0	0	0	0	1	0	1	0	1	1	0	0	0	0	0	0	1	0	1	0	1	1	0	0	0	0	0	0	1	0	1	2021-09-06	2021-09-06
Q7Z7L1	Q7Z7L1	1	1	1	Schlafen family member 11	SLFN11		1	1	1	1	0	0	0	0	1	0	0	0	0	0	0	0	0	0	0	0	1	0	0	0	0	0	0	0	0	0	0	0	1	0	0	0	0	0	0	0	2021-06-01	2021-06-01
Q86SQ4	Q86SQ4	2	2	2	G-protein coupled receptor 126	GPR126		1	2	2	2	0	0	1	2	1	1	0	1	1	1	1	2	0	0	1	2	1	1	0	1	1	1	1	2	0	0	1	2	1	1	0	1	1	1	1	2	2021-06-02	2021-06-02
Q86TU7	Q86TU7	2	2	2	Histone-lysine N-methyltransferase setd3	SETD3		1	2	2	2	1	1	2	2	2	1	1	1	1	2	2	2	1	1	2	2	2	1	1	1	1	2	2	2	1	1	2	2	2	1	1	1	1	2	2	2	2021-09-05	2021-09-05
Q86TX2;P49753	Q86TX2;P49753	4;3	4;3	4;3	Acyl-coenzyme A thioesterase 1;Acyl-coenzyme A thioesterase 2, mitochondrial	ACOT1;ACOT2	;	2	4	4	4	4	4	2	4	4	4	4	4	4	4	4	4	4	4	2	4	4	4	4	4	4	4	4	4	4	4	2	4	4	4	4	4	4	4	4	4	2021-05-18	2021-05-18
Q86U42	Q86U42	3	3	3	Polyadenylate-binding protein 2	PABPN1		1	3	3	3	2	2	2	2	2	3	2	3	2	3	2	2	2	2	2	2	2	3	2	3	2	3	2	2	2	2	2	2	2	3	2	3	2	3	2	2	2021-04-13	2021-04-13
Q86UE4	Q86UE4	17	17	17	Protein LYRIC	MTDH		1	17	17	17	15	17	12	16	16	15	13	16	16	17	17	17	15	17	12	16	16	15	13	16	16	17	17	17	15	17	12	16	16	15	13	16	16	17	17	17	42.8	42.8
Q86UP2	Q86UP2	25	25	25	Kinectin	KTN1		1	25	25	25	19	21	21	22	22	20	17	18	22	23	24	20	19	21	21	22	22	20	17	18	22	23	24	20	19	21	21	22	22	20	17	18	22	23	24	20	25	25
Q86UT6	Q86UT6	4	4	4	NLR family member X1	NLRX1		1	4	4	4	1	3	3	3	2	4	0	0	1	3	3	2	1	3	3	3	2	4	0	0	1	3	3	2	1	3	3	3	2	4	0	0	1	3	3	2	2021-06-05	2021-06-05
Q86UW6	Q86UW6	1	1	1	NEDD4-binding protein 2	N4BP2		1	1	1	1	0	1	0	1	0	0	1	0	0	1	1	0	0	1	0	1	0	0	1	0	0	1	1	0	0	1	0	1	0	0	1	0	0	1	1	0	0.7	0.7
Q86UX7	Q86UX7	26	26	26	Fermitin family homolog 3	FERMT3		1	26	26	26	19	23	22	23	25	24	20	23	23	24	21	23	19	23	22	23	25	24	20	23	23	24	21	23	19	23	22	23	25	24	20	23	23	24	21	23	54.4	54.4
Q86V81	Q86V81	4	4	4	THO complex subunit 4	ALYREF		1	4	4	4	3	2	2	4	4	4	2	4	4	4	4	4	3	2	2	4	4	4	2	4	4	4	4	4	3	2	2	4	4	4	2	4	4	4	4	4	2021-08-26	2021-08-26
Q86VN1	Q86VN1	2	2	2	Vacuolar protein-sorting-associated protein 36	VPS36		1	2	2	2	1	2	1	2	2	2	1	1	1	2	2	1	1	2	1	2	2	2	1	1	1	2	2	1	1	2	1	2	2	2	1	1	1	2	2	1	2021-03-07	2021-03-07
Q86VP6	Q86VP6	14	14	14	Cullin-associated NEDD8-dissociated protein 1	CAND1		1	14	14	14	11	12	11	13	14	12	13	14	13	14	13	13	11	12	11	13	14	12	13	14	13	14	13	13	11	12	11	13	14	12	13	14	13	14	13	13	2021-01-17	2021-01-17
Q86W42	Q86W42	4	4	4	THO complex subunit 6 homolog	THOC6		1	4	4	4	1	4	3	3	1	3	2	2	2	2	3	4	1	4	3	3	1	3	2	2	2	2	3	4	1	4	3	3	1	3	2	2	2	2	3	4	2021-07-21	2021-07-21
Q86WA8	Q86WA8	1	1	1	Lon protease homolog 2, peroxisomal	LONP2		1	1	1	1	1	1	1	1	1	1	0	1	0	0	1	1	1	1	1	1	1	1	0	1	0	0	1	1	1	1	1	1	1	1	0	1	0	0	1	1	2021-02-02	2021-02-02
Q86WN1	Q86WN1	1	1	1	F-BAR and double SH3 domains protein 1	FCHSD1		1	1	1	1	0	1	0	0	1	1	1	0	1	0	1	1	0	1	0	0	1	1	1	0	1	0	1	1	0	1	0	0	1	1	1	0	1	0	1	1	2021-09-01	2021-09-01
Q86WV6	Q86WV6	5	5	5	Stimulator of interferon genes protein	TMEM173		1	5	5	5	3	5	3	5	4	4	1	3	1	4	5	5	3	5	3	5	4	4	1	3	1	4	5	5	3	5	3	5	4	4	1	3	1	4	5	5	29	29
Q86X55	Q86X55	2	2	2	Histone-arginine methyltransferase CARM1	CARM1		1	2	2	2	2	1	2	1	1	1	2	1	1	1	2	1	2	1	2	1	1	1	2	1	1	1	2	1	2	1	2	1	1	1	2	1	1	1	2	1	2021-01-05	2021-01-05
Q86X76	Q86X76	4	4	4	Nitrilase homolog 1	NIT1		1	4	4	4	3	3	2	4	4	3	4	4	4	3	3	3	3	3	2	4	4	3	4	4	4	3	3	3	3	3	2	4	4	3	4	4	4	3	3	3	19	19
Q86XP3	Q86XP3	8	8	8	ATP-dependent RNA helicase DDX42	DDX42		1	8	8	8	4	7	6	6	7	8	5	5	5	7	6	6	4	7	6	6	7	8	5	5	5	7	6	6	4	7	6	6	7	8	5	5	5	7	6	6	2021-03-11	2021-03-11
Q86XS8	Q86XS8	1	1	1	E3 ubiquitin-protein ligase RNF130	RNF130		1	1	1	1	0	0	1	0	1	1	0	1	1	0	0	0	0	0	1	0	1	1	0	1	1	0	0	0	0	0	1	0	1	1	0	1	1	0	0	0	2021-03-04	2021-03-04
Q86Y82	Q86Y82	5	5	5	Syntaxin-12	STX12		1	5	5	5	3	2	4	4	4	4	3	4	4	3	4	4	3	2	4	4	4	4	3	4	4	3	4	4	3	2	4	4	4	4	3	4	4	3	4	4	2021-06-23	2021-06-23
Q86YV0	Q86YV0	3	3	3	RAS protein activator like-3	RASAL3		1	3	3	3	1	2	2	2	2	2	0	2	2	1	3	2	1	2	2	2	2	2	0	2	2	1	3	2	1	2	2	2	2	2	0	2	2	1	3	2	2021-05-04	2021-05-04
Q8IUE6	Q8IUE6	4	2	2	Histone H2A type 2-B	HIST2H2AB		1	4	2	2	4	4	4	4	4	4	4	4	4	4	4	4	2	2	2	2	2	2	2	2	2	2	2	2	2	2	2	2	2	2	2	2	2	2	2	2	40	2021-08-10
Q8IUR7	Q8IUR7	1	1	1	Armadillo repeat-containing protein 8	ARMC8		1	1	1	1	1	0	1	0	0	0	0	1	0	1	1	0	1	0	1	0	0	0	0	1	0	1	1	0	1	0	1	0	0	0	0	1	0	1	1	0	2021-03-01	2021-03-01
Q8IV08	Q8IV08	6	6	6	Phospholipase D3	PLD3		1	6	6	6	4	5	4	5	5	4	5	5	5	4	5	5	4	5	4	5	5	4	5	5	5	4	5	5	4	5	4	5	5	4	5	5	5	4	5	5	2021-02-18	2021-02-18
Q8IV20	Q8IV20	4	4	4	Laccase domain-containing protein 1	LACC1		1	4	4	4	4	1	2	2	4	4	4	4	4	0	1	2	4	1	2	2	4	4	4	4	4	0	1	2	4	1	2	2	4	4	4	4	4	0	1	2	2021-04-14	2021-04-14
Q8IVS2	Q8IVS2	1	1	1	Malonyl-CoA-acyl carrier protein transacylase, mitochondrial	MCAT		1	1	1	1	1	1	1	0	1	1	1	1	1	0	1	1	1	1	1	0	1	1	1	1	1	0	1	1	1	1	1	0	1	1	1	1	1	0	1	1	2021-09-05	2021-09-05
Q8IWB7	Q8IWB7	2	2	2	WD repeat and FYVE domain-containing protein 1	WDFY1		1	2	2	2	1	2	1	2	1	1	0	1	2	2	2	2	1	2	1	2	1	1	0	1	2	2	2	2	1	2	1	2	1	1	0	1	2	2	2	2	11	11
Q8IWT6	Q8IWT6	3	3	3	Volume-regulated anion channel subunit LRRC8A	LRRC8A		1	3	3	3	1	2	2	3	2	2	1	2	2	2	2	2	1	2	2	3	2	2	1	2	2	2	2	2	1	2	2	3	2	2	1	2	2	2	2	2	2021-07-04	2021-07-04
Q8IX12	Q8IX12	10	10	10	Cell division cycle and apoptosis regulator protein 1	CCAR1		1	10	10	10	6	9	6	7	9	9	7	7	10	9	9	9	6	9	6	7	9	9	7	7	10	9	9	9	6	9	6	7	9	9	7	7	10	9	9	9	2021-01-11	2021-01-11
Q8IX19	Q8IX19	2	2	2	Mast cell-expressed membrane protein 1	MCEMP1		1	2	2	2	1	2	1	1	1	2	1	1	1	1	1	2	1	2	1	1	1	2	1	1	1	1	1	2	1	2	1	1	1	2	1	1	1	1	1	2	2021-08-12	2021-08-12
Q8IXB1	Q8IXB1	4	4	4	DnaJ homolog subfamily C member 10	DNAJC10		1	4	4	4	3	4	4	4	4	4	4	4	3	4	2	4	3	4	4	4	4	4	4	4	3	4	2	4	3	4	4	4	4	4	4	4	3	4	2	4	2021-04-04	2021-04-04
Q8IXI1;Q8IXI2	Q8IXI1	6;1	6;1	6;1	Mitochondrial Rho GTPase 2	RHOT2		2	6	6	6	5	5	4	5	6	4	4	5	5	3	4	5	5	5	4	5	6	4	4	5	5	3	4	5	5	5	4	5	6	4	4	5	5	3	4	5	2021-08-17	2021-08-17
Q8IXJ6	Q8IXJ6	1	1	1	NAD-dependent protein deacetylase sirtuin-2	SIRT2		1	1	1	1	1	1	1	1	1	1	1	0	1	1	1	1	1	1	1	1	1	1	1	0	1	1	1	1	1	1	1	1	1	1	1	0	1	1	1	1	2021-01-03	2021-01-03
Q8IXT5	Q8IXT5	1	1	1	RNA-binding protein 12B	RBM12B		1	1	1	1	1	1	1	1	0	1	0	0	0	1	1	1	1	1	1	1	0	1	0	0	0	1	1	1	1	1	1	1	0	1	0	0	0	1	1	1	2021-04-01	2021-04-01
[truncated: 998 more rows]
[truncated: 82 more columns]
