# Supplementary material for: Chlamydia pneumoniae Interferes with Macrophage Differentiation and Cell Cycle Regulation to Promote Its Replication
Source: Hindawi journal article supplement (doi:10.1155/2022/9854449), 2022-04-11
Supplement: f1 [file 9854449.f1.zip › Supplementary_Table_3_revised.docx]

| **48 h** |  |  |  |  | **72 h** |  |  |  |
| --- | --- | --- | --- | --- | --- | --- | --- | --- |
| **Protein** | **Accession no.** | **Student's T-test q-value** | **Fold change** |  | **Protein** | **Accession no.** | **Student's T-test q-value** | **Fold change** |
| S100A9 | P06702 | 0,000 | 3,360 |  | S100A9 | P06702 | 0,000 | 4,092 |
| AMPD3 | Q01432 | 0,009 | 2,576 |  | S100A8 | P05109 | 0,000 | 3,049 |
| LACC1 | Q8IV20 | 0,000 | 2,417 |  | LACC1 | Q8IV20 | 0,005 | 2,787 |
| NFKB2 | Q00653 | 0,000 | 2,259 |  | AMPD3 | Q01432 | 0,005 | 2,713 |
| S100A8 | P05109 | 0,000 | 2,221 |  | ACAD10 | Q6JQN1 | 0,007 | 2,673 |
| SPP1 | P10451 | 0,000 | 2,168 |  | IDI1 | Q13907 | 0,007 | 2,470 |
| CD14 | P08571 | 0,000 | 2,158 |  | CD14 | P08571 | 0,000 | 2,101 |
| PTPN1 | P18031 | 0,000 | 2,070 |  | ICAM1 | P05362 | 0,000 | 1,846 |
| ICAM1 | P05362 | 0,000 | 2,026 |  | RTN1 | Q16799 | 0,018 | 1,787 |
| RTN1 | Q16799 | 0,000 | 2,020 |  | TDO2 | P48775 | 0,004 | 1,762 |
| DDX24 | Q9GZR7 | 0,000 | 1,769 |  | ALOX5AP | P20292 | 0,008 | 1,757 |
| CTNND1 | O60716 | 0,016 | 1,685 |  | EXOSC5 | Q9NQT4 | 0,005 | 1,578 |
| MARCKSL1 | P49006 | 0,017 | 1,647 |  | CHCHD2 | Q9Y6H1 | 0,061 | 1,539 |
| TMPPE | Q6ZT21 | 0,009 | 1,579 |  | CUX1 | Q13948 | 0,003 | 1,538 |
| SH3PXD2B | A1X283 | 0,000 | 1,413 |  | SELO | Q9BVL4 | 0,000 | 1,482 |
| IL4I1 | Q96RQ9 | 0,000 | 1,286 |  | SH3PXD2B | A1X283 | 0,000 | 1,463 |
| HK2 | P52789 | 0,011 | 1,227 |  | MARCKSL1 | P49006 | 0,005 | 1,462 |
| NCF1 | P14598 | 0,000 | 1,221 |  | HK2 | P52789 | 0,015 | 1,453 |
| NAMPT | P43490 | 0,000 | 1,183 |  | NCF1 | P14598 | 0,000 | 1,434 |
| TLR2 | O60603 | 0,010 | 1,154 |  | TYMP | P19971 | 0,000 | 1,414 |
| TDO2 | P48775 | 0,050 | 1,143 |  | NFKB2 | Q00653 | 0,006 | 1,385 |
| TGFBI | Q15582 | 0,000 | 1,125 |  | KYNU | Q16719 | 0,004 | 1,293 |
| HMOX1 | P09601 | 0,009 | 1,097 |  | SPP1 | P10451 | 0,014 | 1,176 |
| MRPS17 | Q9Y2R5 | 0,016 | 1,032 |  | MX1 | P20591 | 0,004 | 1,089 |
| MX1 | P20591 | 0,010 | 1,013 |  | NRP1 | O14786 | 0,005 | 1,089 |
| CD44 | P16070 | 0,000 | 1,007 |  | EHD1 | Q9H4M9 | 0,010 | 0,994 |
| ALOX5AP | P20292 | 0,025 | 1,002 |  | ZFR | Q96KR1 | 0,018 | 0,946 |
| CD36 | P16671 | 0,005 | 0,992 |  | COL6A1 | P12109 | 0,006 | 0,931 |
| KYNU | Q16719 | 0,000 | 0,969 |  | NAMPT | P43490 | 0,000 | 0,931 |
| EHD1 | Q9H4M9 | 0,000 | 0,907 |  | DENND3 | A2RUS2 | 0,006 | 0,925 |
| NRP1 | O14786 | 0,002 | 0,889 |  | HMOX1 | P09601 | 0,013 | 0,892 |
| TYMP | P19971 | 0,000 | 0,864 |  | IL4I1 | Q96RQ9 | 0,007 | 0,850 |
| COL6A1 | P12109 | 0,000 | 0,842 |  | OAT | P04181 | 0,004 | 0,832 |
| PPIF | P30405 | 0,000 | 0,803 |  | PTPN1 | P18031 | 0,106 | 0,806 |
| NQO1 | P15559 | 0,000 | 0,782 |  | TGFBI | Q15582 | 0,005 | 0,716 |
| ERGIC1 | Q969X5 | 0,000 | 0,768 |  | OAS3 | Q9Y6K5 | 0,006 | 0,697 |
| ACSL4 | O60488 | 0,000 | 0,684 |  | ATG7 | O95352 | 0,007 | 0,640 |
| SELO | Q9BVL4 | 0,053 | 0,672 |  | NQO1 | P15559 | 0,006 | 0,632 |
| SLC3A2 | P08195 | 0,010 | 0,628 |  | FAM129B | Q96TA1 | 0,007 | 0,603 |
| CTSD | P07339 | 0,000 | 0,612 |  | PLEKHO2 | Q8TD55 | 0,004 | 0,596 |
| PLEKHO2 | Q8TD55 | 0,000 | 0,604 |  | CD44 | P16070 | 0,018 | 0,595 |
| DENND3 | A2RUS2 | 0,020 | 0,595 |  | HMGB3 | O15347 | 0,009 | 0,585 |
| CSF1R | P07333 | 0,009 | 0,587 |  | PPIF | P30405 | 0,000 | 0,572 |
| PTPRJ | Q12913 | 0,000 | 0,586 |  | ATOX1 | O00244 | 0,007 | 0,563 |
| PLEC | Q15149 | 0,000 | 0,563 |  | LAP3 | P28838 | 0,000 | 0,560 |
| PLAUR | Q03405 | 0,000 | 0,558 |  | MAP1S | Q66K74 | 0,005 | 0,549 |
| TM9SF4 | Q92544 | 0,005 | 0,541 |  | CD36 | P16671 | 0,032 | 0,533 |
| **48 h** |  |  |  |  | **72 h** |  |  |  |
| **Protein** | **Accession no.** | **Student's T-test q-value** | **Fold change** |  | **Protein** | **Accession no.** | **Student's T-test q-value** | **Fold change** |
| ACSL1 | P33121 | 0,000 | 0,515 |  | ACSL1 | P33121 | 0,007 | 0,531 |
| FMNL1 | O95466 | 0,005 | 0,510 |  | ACSL4 | O60488 | 0,005 | 0,529 |
| FAM129B | Q96TA1 | 0,000 | 0,501 |  | CASP1 | P29466 | 0,004 | 0,519 |
| IFI16 | Q16666 | 0,010 | 0,484 |  | ERGIC1 | Q969X5 | 0,017 | 0,503 |
| ALCAM | Q13740 | 0,000 | 0,481 |  | PGD | P52209 | 0,004 | 0,452 |
| ATOX1 | O00244 | 0,016 | 0,479 |  | GMIP | Q9P107 | 0,003 | 0,448 |
| VIM | P086702 | 0,000 | 0,476 |  | PLEC | Q15149 | 0,004 | 0,442 |
| ANPEP | P15144 | 0,000 | 0,473 |  | PTPRJ | Q12913 | 0,003 | 0,435 |
| CTSB | P07858 | 0,000 | 0,427 |  | HSP90AB2P | Q58FF8 | 0,003 | 0,424 |
| APMAP | Q9HDC9 | 0,044 | 0,410 |  | TLR2 | O60603 | 0,007 | 0,417 |
| STAT1 | P42224 | 0,006 | 0,405 |  | S100A11 | P31949 | 0,005 | 0,413 |
| S100A10 | P60903 | 0,016 | 0,388 |  | IFI16 | Q16666 | 0,014 | 0,406 |
| PSAP | P07602 | 0,000 | 0,374 |  | TM9SF4 | Q92544 | 0,006 | 0,405 |
| PML | P29590 | 0,013 | 0,372 |  | CTNND1 | O60716 | 0,003 | 0,404 |
| PGD | P52209 | 0,000 | 0,340 |  | FMNL1 | O95466 | 0,020 | 0,403 |
| ASAH1 | Q13510 | 0,000 | 0,339 |  | SLC3A2 | P08195 | 0,004 | 0,382 |
| LAMTOR3 | Q9UHA4 | 0,002 | 0,332 |  | PLAUR | Q03405 | 0,006 | 0,373 |
| MAN2B1 | O00754 | 0,009 | 0,322 |  | TNS3 | Q68CZ2 | 0,006 | 0,366 |
| LAP3 | P28838 | 0,016 | 0,308 |  | ANXA6 | P08133 | 0,007 | 0,337 |
| GLA | P06280 | 0,005 | 0,305 |  | DOK3 | Q7L591 | 0,007 | 0,330 |
| SQRDL | Q9Y6N5 | 0,000 | 0,299 |  | STAT1 | P42224 | 0,005 | 0,329 |
| CYBB | P04839 | 0,008 | 0,295 |  | CSF1R | P07333 | 0,026 | 0,321 |
| HSP90AB2P | Q58FF8 | 0,019 | 0,293 |  | CTSD | P07339 | 0,006 | 0,315 |
| OAS3 | Q9Y6K5 | 0,010 | 0,292 |  | PKM | P14618 | 0,000 | 0,310 |
| RAB27A | P51159 | 0,010 | 0,289 |  | FLII | Q13045 | 0,003 | 0,266 |
| HMGB3 | O15347 | 0,162 | 0,267 |  | GLA | P06280 | 0,018 | 0,254 |
| PPIB | P23284 | 0,000 | 0,265 |  | ALCAM | Q13740 | 0,006 | 0,243 |
| MAP1S | Q66K74 | 0,011 | 0,261 |  | CYBB | P04839 | 0,004 | 0,243 |
| CUX1 | Q13948 | 0,594 | 0,226 |  | MAN2B1 | O00754 | 0,004 | 0,225 |
| HYOU1 | Q9Y4L1 | 0,000 | 0,220 |  | PSAP | P07602 | 0,008 | 0,223 |
| DOK3 | Q7L591 | 0,082 | 0,219 |  | PML | P29590 | 0,029 | 0,215 |
| OAT | P04181 | 0,108 | 0,216 |  | TMPPE | Q6ZT21 | 0,028 | 0,202 |
| ANXA2 | P07355 | 0,000 | 0,200 |  | HK1 | P19367 | 0,009 | 0,201 |
| HK1 | P19367 | 0,011 | 0,190 |  | S100A10 | P60903 | 0,013 | 0,197 |
| TNS3 | Q68CZ2 | 0,031 | 0,181 |  | VIM | P08670 | 0,047 | 0,192 |
| ATG7 | O95352 | 0,027 | 0,175 |  | SSBP1 | Q04837 | 0,755 | 0,162 |
| CASP1 | P29466 | 0,242 | 0,174 |  | NAP1L1 | P55209 | 0,006 | 0,148 |
| PSPC1 | Q8WXF1 | 0,022 | 0,173 |  | ANXA2 | P07355 | 0,003 | 0,146 |
| CTSZ | Q9UBR2 | 0,027 | 0,171 |  | CTSB | P07858 | 0,018 | 0,146 |
| KPNA6 | O60684 | 0,176 | 0,168 |  | CTSZ | Q9UBR2 | 0,270 | 0,138 |
| ATP2A2 | P16615 | 0,016 | 0,165 |  | ANPEP | P15144 | 0,155 | 0,132 |
| PDHA1 | P08559 | 0,005 | 0,162 |  | ASAH1 | Q13510 | 0,146 | 0,125 |
| RAB1A | P62820 | 0,008 | 0,161 |  | CMPK1 | P30085 | 0,000 | 0,110 |
| S100A6 | P06703 | 0,051 | 0,129 |  | FABP5 | Q01469 | 0,018 | 0,104 |
| GLUD1 | P00367 | 0,013 | 0,126 |  | HDLBP | Q00341 | 0,005 | 0,094 |
| GMIP | Q9P107 | 0,172 | 0,121 |  | DCAF8 | Q5TAQ9 | 0,853 | 0,076 |
| NAP1L1 | P55209 | 0,122 | 0,118 |  | HYOU1 | Q9Y4L1 | 0,056 | 0,028 |
| **48 h** |  |  |  |  | **72 h** |  |  |  |
| **Protein** | **Accession no.** | **Student's T-test q-value** | **Fold change** |  | **Protein** | **Accession no.** | **Student's T-test q-value** | **Fold change** |
| PKM | P14618 | 0,199 | 0,115 |  | SQRDL | Q9Y6N5 | 0,762 | 0,027 |
| FUBP1 | Q96AE4 | 0,066 | 0,115 |  | RAB1A | P62820 | 0,355 | 0,025 |
| HDLBP | Q00341 | 0,055 | 0,110 |  | KPNA6 | O60684 | 1,000 | 0,000 |
| CTSC | P53634 | 0,286 | 0,104 |  | RAB27A | P51159 | 0,963 | -0,004 |
| CTSS | P25774 | 0,126 | 0,096 |  | FUCA1 | P04066 | 0,821 | -0,009 |
| LAMP1 | P11279 | 0,205 | 0,096 |  | CTSS | P25774 | 0,691 | -0,058 |
| XRCC6 | P12956 | 0,123 | 0,094 |  | PPIB | P23284 | 0,184 | -0,061 |
| PLD3 | Q8IV08 | 0,376 | 0,083 |  | GAA | P10253 | 0,180 | -0,063 |
| FLII | Q13045 | 0,205 | 0,071 |  | PFKP | Q01813 | 0,185 | -0,068 |
| TPP1 | O14773 | 0,218 | 0,069 |  | S100A6 | P06703 | 0,631 | -0,085 |
| NDUFA10 | O95299 | 0,762 | 0,044 |  | ATP2A2 | P16615 | 0,017 | -0,095 |
| FUCA1 | P04066 | 0,775 | 0,042 |  | CTSC | P53634 | 0,274 | -0,095 |
| ANXA6 | P08133 | 0,779 | 0,037 |  | XRCC6 | P12956 | 0,014 | -0,098 |
| TPR | P12270 | 0,689 | 0,019 |  | DDX24 | Q9GZR7 | 0,873 | -0,100 |
| GNS | P15586 | 0,835 | 0,013 |  | CPNE1 | Q99829 | 0,015 | -0,125 |
| ATP5B | P06576 | 0,872 | 0,010 |  | VCL | P18206 | 0,039 | -0,131 |
| P4HB | P07237 | 0,861 | 0,006 |  | LAMTOR3 | Q9UHA4 | 0,018 | -0,132 |
| IDI1 | Q13907 | 1,000 | 0,000 |  | MBNL1 | Q9NR56 | 0,071 | -0,137 |
| PARP10 | Q53GL7 | 1,000 | 0,000 |  | PSPC1 | Q8WXF1 | 0,017 | -0,152 |
| ACAD10 | Q6JQN1 | 1,000 | 0,000 |  | ACTB | P60709 | 0,007 | -0,162 |
| EXOSC5 | Q9NQT4 | 1,000 | 0,000 |  | ACAA1 | P09110 | 0,057 | -0,164 |
| HNRNPU | Q00839 | 0,879 | -0,011 |  | GNS | P15586 | 0,028 | -0,174 |
| HEXB | P07686 | 0,871 | -0,022 |  | TPP1 | O14773 | 0,005 | -0,174 |
| METTL7B | Q6UX53 | 0,678 | -0,033 |  | GLUD1 | P00367 | 0,005 | -0,179 |
| HNRNPM | P52272 | 0,536 | -0,035 |  | ARHGDIB | P52566 | 0,007 | -0,182 |
| ATP5H | O75947 | 0,286 | -0,040 |  | SAMHD1 | Q9Y3Z3 | 0,006 | -0,202 |
| GAA | P10253 | 0,663 | -0,042 |  | PGM2 | Q96G03 | 0,007 | -0,204 |
| DLD | P09622 | 0,126 | -0,053 |  | P4HB | P07237 | 0,007 | -0,208 |
| DECR1 | Q16698 | 0,203 | -0,057 |  | TUBB4B | P68371 | 0,005 | -0,209 |
| CMPK1 | P30085 | 0,128 | -0,061 |  | NAPRT | Q6XQN6 | 0,037 | -0,214 |
| ACAA1 | P09110 | 0,419 | -0,063 |  | TUBB6 | Q9BUF5 | 0,004 | -0,217 |
| CPNE3 | O75131 | 0,761 | -0,067 |  | ATP5B | P06576 | 0,000 | -0,219 |
| NNT | Q13423 | 0,123 | -0,068 |  | PDHA1 | P08559 | 0,003 | -0,227 |
| SAMHD1 | Q9Y3Z3 | 0,092 | -0,068 |  | PLD3 | Q8IV08 | 0,036 | -0,234 |
| HMGB1 | P09429 | 0,328 | -0,069 |  | LAMP1 | P11279 | 0,018 | -0,248 |
| CBX5 | P45973 | 0,633 | -0,069 |  | PYCARD | Q9ULZ3 | 0,007 | -0,250 |
| HEXA | P06865 | 0,383 | -0,070 |  | SLC25A5 | P05141 | 0,010 | -0,250 |
| CPVL | Q9H3G5 | 0,366 | -0,072 |  | HNRNPU | Q00839 | 0,006 | -0,254 |
| DDX17 | Q92841 | 0,187 | -0,073 |  | HCFC1 | P51610 | 0,005 | -0,264 |
| ACAT1 | P24752 | 0,066 | -0,084 |  | ITGAL | P20701 | 0,004 | -0,270 |
| IDH2 | P48735 | 0,047 | -0,085 |  | ESYT1 | Q9BSJ8 | 0,003 | -0,271 |
| AK2 | P54819 | 0,159 | -0,087 |  | PPIH | O43447 | 0,003 | -0,272 |
| ZFR | Q96KR1 | 0,565 | -0,090 |  | IVD | P26440 | 0,018 | -0,284 |
| PTBP1 | P26599 | 0,019 | -0,092 |  | DECR1 | Q16698 | 0,006 | -0,286 |
| SRP9 | P49458 | 0,455 | -0,098 |  | ATP5H | O75947 | 0,005 | -0,287 |
| PBXIP1 | Q96AQ6 | 0,568 | -0,100 |  | CHI3L1 | P36222 | 0,005 | -0,292 |
| HNRNPL | P14866 | 0,077 | -0,107 |  | DLD | P09622 | 0,005 | -0,294 |
| **48 h** |  |  |  |  | **72 h** |  |  |  |
| **Protein** | **Accession no.** | **Student's T-test q-value** | **Fold change** |  | **Protein** | **Accession no.** | **Student's T-test q-value** | **Fold change** |
| MRPL16 | Q9NX20 | 0,697 | -0,110 |  | SCIN | Q9Y6U3 | 0,004 | -0,307 |
| SCAMP2 | O15127 | 0,084 | -0,115 |  | TPR | P12270 | 0,007 | -0,307 |
| ERP29 | P30040 | 0,019 | -0,119 |  | CAP1 | Q01518 | 0,003 | -0,308 |
| RBBP7 | Q16576 | 0,027 | -0,122 |  | ANXA11 | P50995 | 0,004 | -0,312 |
| PARP1 | P09874 | 0,031 | -0,124 |  | PTBP1 | P26599 | 0,003 | -0,314 |
| NUCB2 | P80303 | 0,107 | -0,133 |  | HEXB | P07686 | 0,007 | -0,315 |
| NPM1 | P06748 | 0,009 | -0,143 |  | DDX17 | Q92841 | 0,005 | -0,325 |
| ADAM10 | O14672 | 0,296 | -0,145 |  | VBP1 | P61758 | 0,006 | -0,331 |
| IVD | P26440 | 0,017 | -0,145 |  | HEXA | P06865 | 0,007 | -0,332 |
| VAMP8 | Q9BV40 | 0,055 | -0,145 |  | IDH2 | P48735 | 0,000 | -0,335 |
| AHNAK | Q09666 | 0,050 | -0,146 |  | NUCB2 | P80303 | 0,007 | -0,338 |
| ESYT1 | Q9BSJ8 | 0,009 | -0,159 |  | CPNE3 | O75131 | 0,006 | -0,341 |
| PGM2 | Q96G03 | 0,005 | -0,163 |  | PPIE | Q9UNP9 | 0,006 | -0,343 |
| HIST1H2BM | Q99879 | 0,044 | -0,166 |  | NNT | Q13423 | 0,007 | -0,348 |
| HNRNPUL2 | Q1KMD3 | 0,050 | -0,171 |  | AK2 | P54819 | 0,005 | -0,356 |
| SLC25A5 | P05141 | 0,060 | -0,171 |  | PBXIP1 | Q96AQ6 | 0,005 | -0,381 |
| GOT2 | P00505 | 0,005 | -0,176 |  | ACAT1 | P24752 | 0,006 | -0,389 |
| PTGS1 | P23219 | 0,040 | -0,180 |  | PARP1 | P09874 | 0,006 | -0,389 |
| ACO2 | Q99798 | 0,013 | -0,190 |  | HNRNPA2B1 | P22626 | 0,005 | -0,391 |
| S100A11 | P31949 | 0,025 | -0,191 |  | HMGB1 | P09429 | 0,006 | -0,391 |
| CES1 | P23141 | 0,004 | -0,215 |  | METTL7B | Q6UX53 | 0,005 | -0,392 |
| ACTB | P60709 | 0,025 | -0,216 |  | NDUFA10 | O95299 | 0,005 | -0,395 |
| ESYT2 | A0FGR8 | 0,017 | -0,218 |  | FUBP1 | Q96AE4 | 0,005 | -0,406 |
| ECH1 | Q13011 | 0,019 | -0,220 |  | NDUFA9 | Q16795 | 0,006 | -0,408 |
| CBX3 | Q13185 | 0,000 | -0,231 |  | GOT2 | P00505 | 0,004 | -0,409 |
| NDUFA9 | Q16795 | 0,017 | -0,232 |  | NASP | P49321 | 0,006 | -0,412 |
| GLIPR2 | Q9H4G4 | 0,024 | -0,234 |  | HNRNPM | P52272 | 0,003 | -0,413 |
| NASP | P49321 | 0,008 | -0,236 |  | AHNAK | Q09666 | 0,005 | -0,415 |
| CHCHD2 | Q9Y6H1 | 0,419 | -0,238 |  | HINT2 | Q9BX68 | 0,003 | -0,421 |
| VBP1 | P61758 | 0,027 | -0,239 |  | HNRNPUL2 | Q1KMD3 | 0,006 | -0,434 |
| HNRNPA2B1 | P22626 | 0,002 | -0,244 |  | SCAMP2 | O15127 | 0,003 | -0,436 |
| FABP5 | Q01469 | 0,000 | -0,250 |  | ACO2 | Q99798 | 0,006 | -0,438 |
| CPNE1 | Q99829 | 0,007 | -0,258 |  | ERP29 | P30040 | 0,005 | -0,447 |
| TUBB6 | Q9BUF5 | 0,019 | -0,259 |  | CPVL | Q9H3G5 | 0,005 | -0,449 |
| VCL | P18206 | 0,007 | -0,265 |  | DAK | Q3LXA3 | 0,007 | -0,455 |
| ACADM | P11310 | 0,000 | -0,272 |  | HNRNPL | P14866 | 0,005 | -0,464 |
| CHI3L1 | P36222 | 0,005 | -0,281 |  | GMFG | O60234 | 0,005 | -0,476 |
| HCFC1 | P51610 | 0,000 | -0,281 |  | CDK6 | Q00534 | 0,007 | -0,482 |
| HINT2 | Q9BX68 | 0,010 | -0,294 |  | RBBP7 | Q16576 | 0,005 | -0,484 |
| SUN2 | Q9UH99 | 0,017 | -0,298 |  | HIST1H2BM | Q99879 | 0,006 | -0,501 |
| PPIH | O43447 | 0,017 | -0,306 |  | PLAC8 | Q9NZF1 | 0,003 | -0,502 |
| ITGAM | P11215 | 0,000 | -0,313 |  | NPM1 | P06748 | 0,003 | -0,506 |
| SPTBN1 | Q01082 | 0,007 | -0,319 |  | ACADM | P11310 | 0,000 | -0,506 |
| ARHGDIB | P52566 | 0,010 | -0,320 |  | PTGS1 | P23219 | 0,000 | -0,521 |
| CAP1 | Q01518 | 0,005 | -0,324 |  | SPTBN1 | Q01082 | 0,006 | -0,522 |
| ITGAL | P20701 | 0,008 | -0,326 |  | ESYT2 | A0FGR8 | 0,006 | -0,540 |
| DNASE2 | O00115 | 0,060 | -0,327 |  | ECH1 | Q13011 | 0,000 | -0,554 |
| **48 h** |  |  |  |  | **72 h** |  |  |  |
| **Protein** | **Accession no.** | **Student's T-test q-value** | **Fold change** |  | **Protein** | **Accession no.** | **Student's T-test q-value** | **Fold change** |
| TUBB4B | P68371 | 0,009 | -0,327 |  | HMGB2 | P26583 | 0,005 | -0,555 |
| ANXA11 | P50995 | 0,015 | -0,330 |  | CES1 | P23141 | 0,009 | -0,558 |
| SCIN | Q9Y6U3 | 0,000 | -0,346 |  | ADAM10 | O14672 | 0,005 | -0,563 |
| NAPRT | Q6XQN6 | 0,005 | -0,348 |  | CBX3 | Q13185 | 0,003 | -0,565 |
| PFKP | Q01813 | 0,000 | -0,359 |  | GLIPR2 | Q9H4G4 | 0,003 | -0,566 |
| MBNL1 | Q9NR56 | 0,010 | -0,362 |  | ITGAM | P11215 | 0,005 | -0,575 |
| RPA1 | P27694 | 0,026 | -0,378 |  | CBX5 | P45973 | 0,006 | -0,577 |
| MCM7 | P33993 | 0,000 | -0,411 |  | MCM7 | P33993 | 0,005 | -0,578 |
| HMGB2 | P26583 | 0,022 | -0,414 |  | RPA1 | P27694 | 0,000 | -0,610 |
| PPIE | Q9UNP9 | 0,000 | -0,441 |  | STMN1 | P16949 | 0,003 | -0,651 |
| PLAC8 | Q9NZF1 | 0,022 | -0,446 |  | SRP9 | P49458 | 0,003 | -0,695 |
| STMN1 | P16949 | 0,003 | -0,492 |  | CA2 | P00918 | 0,009 | -0,697 |
| CDK6 | Q00534 | 0,002 | -0,504 |  | APMAP | Q9HDC9 | 0,005 | -0,735 |
| PYCARD | Q9ULZ3 | 0,000 | -0,533 |  | FABP4 | P15090 | 0,008 | -0,741 |
| DAK | Q3LXA3 | 0,005 | -0,545 |  | DNASE2 | O00115 | 0,008 | -0,751 |
| GMFG | O60234 | 0,000 | -0,559 |  | SUN2 | Q9UH99 | 0,003 | -0,755 |
| CA2 | P00918 | 0,000 | -0,582 |  | MCM2 | P49736 | 0,000 | -0,762 |
| MCM2 | P49736 | 0,002 | -0,602 |  | MCM3 | P25205 | 0,006 | -0,777 |
| MCM5 | P33992 | 0,000 | -0,663 |  | VAMP8 | Q9BV40 | 0,007 | -0,802 |
| MCM4 | P33991 | 0,017 | -0,667 |  | MCM6 | Q14566 | 0,005 | -0,916 |
| MCM3 | P25205 | 0,000 | -0,865 |  | MRPL16 | Q9NX20 | 0,006 | -1,006 |
| FABP4 | P15090 | 0,000 | -0,960 |  | MCM4 | P33991 | 0,000 | -1,102 |
| MCM6 | Q14566 | 0,008 | -1,033 |  | MRPS17 | Q9Y2R5 | 0,005 | -1,157 |
| DCAF8 | Q5TAQ9 | 0,003 | -1,655 |  | MCM5 | P33992 | 0,004 | -1,223 |
| SSBP1 | Q04837 | 0,009 | -1,789 |  | PARP10 | Q53GL7 | 0,003 | -1,418 |
| GGT1 | P19440 | 0,000 | -3,287 |  | GGT1 | P19440 | 0,104 | -1,577 |
