# Supplementary figures and images for: Chlamydia pneumoniae Interferes with Macrophage Differentiation and Cell Cycle Regulation to Promote Its Replication
Source: Hindawi journal article supplement (doi:10.1155/2022/9854449), 2022-04-11

Supplementary figure 1


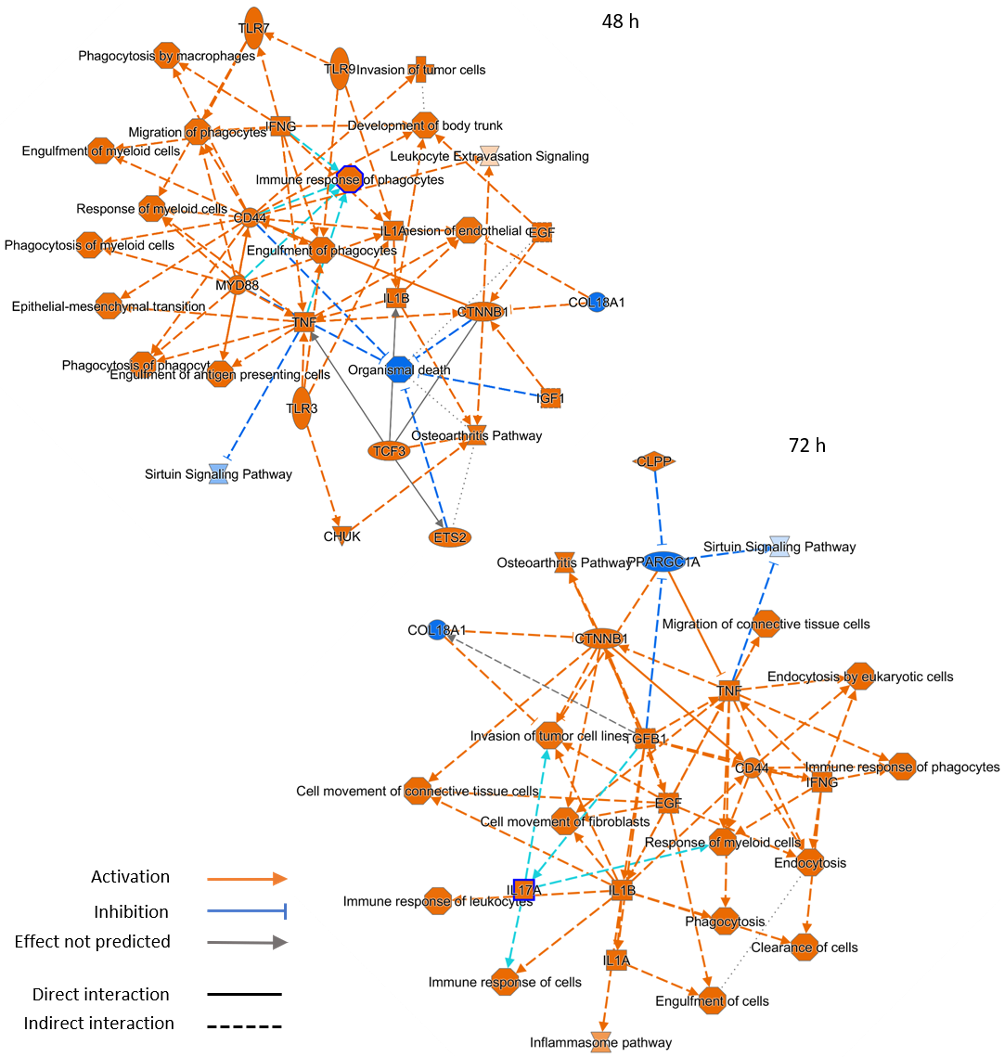


Supplementary figure 2


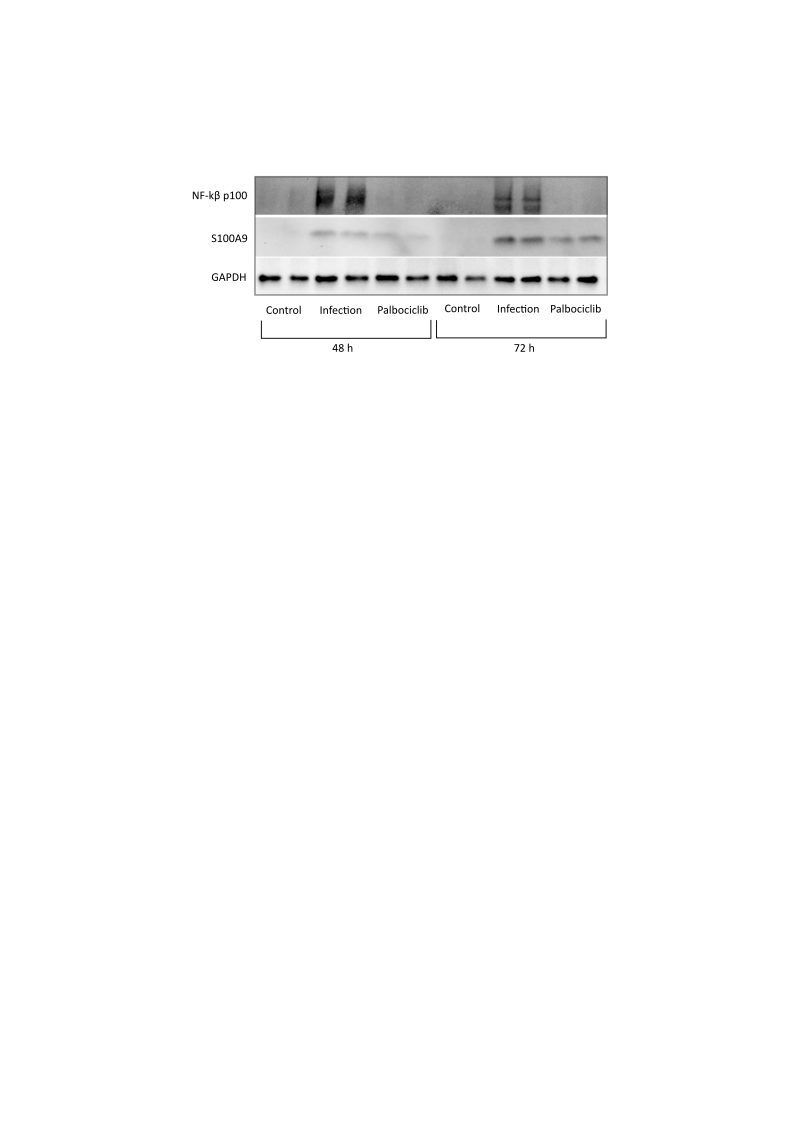

Supplement: f1 [file 9854449.f1.zip › Supplementary_figure_1_and_2.docx]
